# Supplementary material for: CRISPRpred: A flexible and efficient tool for sgRNAs on-target activity prediction in CRISPR/Cas9 systems
Source: PLoS One. 2017 Aug 2;12(8):e0181943. doi: 10.1371/journal.pone.0181943 (PMC5540555; doi:10.1371/journal.pone.0181943)
Supplement: S1 File — A public dataset that contains 5310 guide sgRNAs. (CSV) [file pone.0181943.s001.csv]

	30mer	Target gene	Percent Peptide	Amino Acid Cut position	score_drug_gene_rank	score_drug_gene_threshold	drug	predictions
0	CAGAAAAAAAAACACTGCAACAAGAGGGTA	CD5	72.87	360.0	0.083682008	0	nodrug	0.544411858399077
1	TTTTAAAAAACCTACCGTAAACTCGGGTCA	NF1	65.8	1868.0	0.868206522	1	PLX_2uM	0.6175122137988865
2	TCAGAAAAAGCAGCGTCAGTGGATTGGCCC	CD5	84.21	416.0	0.18410041800000002	0	nodrug	0.47623183469474284
3	AATAAAAAATAGGATTCCCAGCTTTGGAAG	NF1	56.39	1601.0	0.43206521700000006	0	PLX_2uM	0.45988200093404785
4	GATGAAAAATATGTAAACAGCATTTGGGAC	CUL3	4.3	33.0	0.149350649	0	PLX_2uM	0.2908406196776585
5	TTCCAAAAATTCTAACGTGAGGTGTGGCTC	NF1	67.7	1922.0	0.239130435	0	PLX_2uM	0.570407965512794
6	CCAGAAAACAACGGCCCAGGAGGGCGGCCA	CD5	52.23	258.0	0.18828451899999998	0	nodrug	0.5924848939845893
7	TTAGAAAACATGTTCCAGAGCAGTTGGTAG	NF1	44.24	1256.0	0.533967391	0	PLX_2uM	0.619402316314524
8	GCCAAAAACCAGGGGCCGGTGCTGAGGGCA	MED12	16.31	355.0	0.579004329	0	AZD_200nM	0.49474304315991835
9	GCCAAAAACCAGGGGCCGGTGCTGAGGGCA	MED12	16.31	355.0	0.612554113	0	PLX_2uM	0.49474304315991835
10	AACAAAAACCTAGCCGGCTCCAAACGGGGA	TADA2B	78.1	328.0	0.084210526	0	AZD_200nM	0.37522693131138174
11	CGTCAAAACTGGAAGGAATGTTTAGGGATA	CUL3	61.72	474.0	0.188311688	0	PLX_2uM	0.41434369434043977
12	TTCAAAAAGATCGTACATGTTCACCGGAGG	TADA1	82.39	276.0	0.71559633	0	AZD_200nM	0.5607602116665414
13	ATACAAAAGGAAGATTGCTGATGAGGGCAG	CD45	41.95	474.0	0.581227437	0	nodrug	0.6174712870877812
14	GGTGAAAAGGACCCCACGAAGTGTTGGATA	HPRT1	78.44	171.0	0.34375	0	6TG_2ug/mL	0.500409190116154
15	TCCTAAAAGGCAAGAAATGGAATCAGGGAT	NF1	90.17	2560.0	0.282608696	0	PLX_2uM	0.2402105197477595
16	CAATAAAAGTATCAGTGTGTATAGAGGTGA	THY1	76.54	124.0	0.677419355	0	nodrug	0.5123059644513027
17	ATGAAAAATATGTAAACAGCATTTGGGACC	CUL3	4.3	33.0	0.24675324699999998	0	PLX_2uM	0.40986192606716154
18	TGATAAAATCTACAGTCATAGGAATGGATC	HPRT1	43.12	94.0	0.5625	0	6TG_2ug/mL	0.5861378368861838
19	GTGCAAAATTAAAACGACTCCTGAAGGGTA	NF1	6.83	194.0	0.100543478	0	PLX_2uM	0.5083450384103347
20	CACCAAACACAAGTGGGAGCAGGCTGGTGA	H2-K	46.07	170.0	0.692307692	0	nodrug	0.642402241716234
21	TTTAAAACAGACTTTCTCTCTAAGTGGTTT	NF1	58.51	1661.0	0.975543478	1	PLX_2uM	0.5916098640442418
22	AAGAAAACAGGGGCCCGAAACCCAAGGCAG	NF1	18.25	518.0	0.44293478299999994	0	PLX_2uM	0.6313676905098193
23	AACGAAACAGTGACGTTCCGTCTCTGGAAT	CD28	45.87	100.0	0.013513513999999999	0	nodrug	0.4439004530287398
24	TGGAAAACAGTGTGCAGTTCCAGTTGGAGG	CD5	12.55	62.0	0.715481172	0	nodrug	0.6305218551122606
25	TGAGAAACATAAGGAGTATAGCCCTGGAGG	MED12	89.25	1943.0	0.198051948	0	AZD_200nM	0.3551152316511869
26	TGAGAAACATAAGGAGTATAGCCCTGGAGG	MED12	89.25	1943.0	0.1504329	0	PLX_2uM	0.3551152316511869
27	TCCGAAACATCTCGTACAGTGACAAGGAGG	NF2	45.04	268.0	0.632286996	0	PLX_2uM	0.6712923253532699
28	AAAAAAACATGATATCTAAGTTAAAGGTAA	CUL3	59.64	458.0	0.071428571	0	PLX_2uM	0.3396189215594716
29	CCAAAAACCAGGGGCCGGTGCTGAGGGCAC	MED12	16.26	354.0	0.477272727	0	AZD_200nM	0.5546447059757476
30	CCAAAAACCAGGGGCCGGTGCTGAGGGCAC	MED12	16.26	354.0	0.533549784	0	PLX_2uM	0.5546447059757476
31	ACAAAAACCTAGCCGGCTCCAAACGGGGAA	TADA2B	78.1	328.0	0.126315789	0	AZD_200nM	0.3835387749328504
32	CCAGAAACGCCTAAGCCTAGTTGTGGGGAT	CD45	19.56	221.0	0.657039711	0	nodrug	0.5713270026541496
33	ACAGAAACTGATGGGCTGGCATTCTGGGCT	CD43	11.14	44.0	0.007246376999999999	0	nodrug	0.19189369407064918
34	TGCTAAACTGCCCACCTCAGTCCAGGGACA	MED12	66.1	1439.0	0.8365800870000001	1	AZD_200nM	0.7059911675473216
35	TGCTAAACTGCCCACCTCAGTCCAGGGACA	MED12	66.1	1439.0	0.851731602	1	PLX_2uM	0.7059911675473216
36	CTTCAAAGAAGGCCACTCGGGACTTGGCGC	NF2	98.66	587.0	0.139013453	0	PLX_2uM	0.22604443085192696
37	TGACAAAGACTTCTGTGTCCAGAAGGGCAA	CD45	1.5	17.0	0.996389892	1	nodrug	0.6728217154459321
38	CCCCAAAGAGGAGGAGAAGGTGCAAGGCCA	CD43	1.01	4.0	0.644927536	0	nodrug	0.5940822656150905
39	CAGAAAAGAGTGATGGCACTGCTGAGGCGC	NF1	26.88	763.0	0.6902173909999999	0	PLX_2uM	0.6298749852388108
40	ATGAAAAGATCTACTGCCCTCCTGAGGCTT	NF2	22.69	135.0	0.9372197309999999	1	PLX_2uM	0.7471390018736193
41	AAGGAAAGCAGACTTATGGAGACATGGAAG	CD45	80.62	911.0	0.725631769	0	nodrug	0.5854654184578774
42	GAGGAAAGCAGCCAGGACAGCAGTGGGCAG	CD33	80.49	293.0	0.26406926399999997	0	nodrug	0.5403754540040818
43	TGGTAAAGCAGTCGCCCCTGCTTGTGGTAG	CD28	13.76	30.0	0.405405405	0	nodrug	0.5893242228362328
44	CTCAAAAGCATGTCTTGGTGCTGGTGGGAT	CUL3	68.62	527.0	0.279220779	0	PLX_2uM	0.4613847191572748
45	ATGCAAAGCCATATGAAATTGTAGTGGACC	NF1	57.84	1642.0	0.9646739129999999	1	PLX_2uM	0.7199002459027667
46	ACGAAAAGCTCTTGCTGGCCATGGAGGAAG	NF1	10.92	310.0	0.36956521700000006	0	PLX_2uM	0.6781406532931712
47	AGGTAAAGCTCTTGTTTCTGAAGAAGGAGA	CUL3	43.1	331.0	0.62987013	0	PLX_2uM	0.49966718918634156
48	AAGGAAAGCTTATCGGTTACGAGATGGTCA	TADA1	59.7	200.0	0.568807339	0	AZD_200nM	0.6154171378893125
49	CCTCAAAGCTTCGTGTTAATAAGCTGGTAA	NF2	49.41	294.0	0.439461883	0	PLX_2uM	0.5705774338363366
50	ATCAAAAGGAGATACTTACACAACAGGAAA	NF1	93.59	2657.0	0.669836957	0	PLX_2uM	0.23175509522180537
51	ATTGAAAGGATCATCACGAAACTCTGGCAT	TADA1	91.94	308.0	0.23853211	0	AZD_200nM	0.4406354963902275
52	CCTAAAAGGCAAGAAATGGAATCAGGGATC	NF1	90.21	2561.0	0.266304348	0	PLX_2uM	0.38904290029634647
53	AGCAAAAGGCCACAGTTATTGTCATGGTCA	CD45	50.88	575.0	0.653429603	0	nodrug	0.6741945739866068
54	CTGAAAAGGCCCAGATCACCGAGGAGGAGG	NF2	65.88	392.0	0.6008968610000001	0	PLX_2uM	0.7274310081298514
55	CCGGAAAGGCCCGGATCCGCATCTTGGTGT	CUL3	2.08	16.0	0.506493506	0	PLX_2uM	0.484396171965372
56	TGTTAAAGGCTGCTGGGGAAGAATTGGAGA	MED12	66.61	1450.0	0.6536796539999999	0	AZD_200nM	0.4336739339986081
57	TGTTAAAGGCTGCTGGGGAAGAATTGGAGA	MED12	66.61	1450.0	0.7629870129999999	0	PLX_2uM	0.4336739339986081
58	CCGCAAAGGGACAGCAGAAACTGGTGGGTT	MED12	36.29	790.0	0.6991341990000001	0	AZD_200nM	0.6403670819449289
59	CCGCAAAGGGACAGCAGAAACTGGTGGGTT	MED12	36.29	790.0	0.6829004329999999	0	PLX_2uM	0.6403670819449289
60	AAAAAAAGTAATTCACTTACAGTCTGGCTT	HPRT1	81.65	178.0	0.375	0	6TG_2ug/mL	0.42952609950621534
61	CACAAAAGTAGTCGCCCTCATCCTTGGTGG	THY1	61.11	99.0	0.612903226	0	nodrug	0.5468501975621566
62	CTGCAAAGTCTCTGGCAGGGGCGTAGGGCT	CD28	95.41	208.0	0.5	0	nodrug	0.3304016683981944
63	GATGAAAGTGCGCAAACAGGTGGCAGGAAA	NF1	39.77	1129.0	0.22826087	0	PLX_2uM	0.5710475192012436
64	TCAGAAATAATACCAACAACTGGAGGGAGA	CD13	76.53	740.0	0.752747253	0	nodrug	0.5760529153812876
65	GTGGAAATACCAGTCAAATGTCCATGGATC	NF1	22.68	644.0	0.39673913	0	PLX_2uM	0.6243503475095715
66	ACCCAAATCAAAGGAAATAGAAAATGGTCA	CUL3	85.16	654.0	0.75974026	0	PLX_2uM	0.3776143351358685
67	GAGTAAATCCACTTACCTATAGGAAGGGTC	NF1	87.53	2485.0	0.546195652	0	PLX_2uM	0.5140931709299936
68	CAGGAAATCCATGAGCCTGGACATGGGGCA	NF1	88.94	2525.0	0.710597826	0	PLX_2uM	0.4453548165549907
69	CCAAAAATCCCCGCTTGTGAACACTGGGGT	NF2	26.39	157.0	0.502242152	0	PLX_2uM	0.5168211871016367
70	TTCCAAATCCTCAGCATAATGATTAGGTAT	HPRT1	12.39	27.0	0.3125	0	6TG_2ug/mL	0.5035094465707799
71	TAATAAATCTGTATCAGATGACTCCGGAAA	NF2	30.25	180.0	0.34529148	0	PLX_2uM	0.6508489780667635
72	TTCTAAATGACATTTATTATGCTTCGGAAA	NF1	62.87	1785.0	0.22554347800000002	0	PLX_2uM	0.4310209889317773
73	CCAGAAATGATGATTGCTGCTCAGGGGCCA	CD45	76.28	862.0	0.931407942	1	nodrug	0.6296470119577849
74	CGATAAATGCCAGGAAGCTACTGCAGGTAT	MED12	20.58	448.0	0.8019480520000001	1	AZD_200nM	0.6203210170059139
75	CGATAAATGCCAGGAAGCTACTGCAGGTAT	MED12	20.58	448.0	0.8906926409999999	1	PLX_2uM	0.6203210170059139
76	TCCAAAATGCTAAGTGTGGAAATGAGGATT	CD45	6.55	74.0	0.38628158799999995	0	nodrug	0.5747327852961114
77	TGCAAAATTAAAACGACTCCTGAAGGGTAA	NF1	6.83	194.0	0.900815217	1	PLX_2uM	0.6817258650647677
78	TCATAAATTCCTCAAACTTTGAACTGGTAA	NF1	55.2	1567.0	0.75951087	0	PLX_2uM	0.44579538219453557
79	ATCCAAATTTCTGGCTGCAAGTGCAGGAGT	CD33	6.87	25.0	0.20129870100000002	0	nodrug	0.5120353802369727
80	GATAAAATTTGGCCAAGAAGTGAAAGGTGA	NF2	15.97	95.0	0.677130045	0	PLX_2uM	0.6506766709482937
81	TTCCAACAAAATGTCAGAATGGATTGGCTC	CD45	40.71	460.0	0.288808664	0	nodrug	0.48605022058244024
82	GATGAACAACAGGAACTCGTTGAAAGGGGT	CD45	39.47	446.0	0.458483755	0	nodrug	0.48164401285237457
83	AGACAACAAGAGCTCTTGGTTGCAGGGATG	NF1	79.08	2245.0	0.61548913	0	PLX_2uM	0.45545032164644444
84	TAGAAACAATATTGGATAAAGCAATGGTCC	CUL3	54.04	415.0	0.28571428600000004	0	PLX_2uM	0.5916450040521954
85	AAGCAACAATGGCCAACGAAGCACTGGTGA	NF2	62.69	373.0	0.874439462	1	PLX_2uM	0.5487629833590951
86	TCAAAACACTCAAGCACCCAGGTCAGGAAC	MED12	11.76	256.0	0.861471861	1	AZD_200nM	0.5617918932915468
87	TCAAAACACTCAAGCACCCAGGTCAGGAAC	MED12	11.76	256.0	0.811688312	1	PLX_2uM	0.5617918932915468
88	TGGTAACACTGAGACAGCTTCTCCTGGGCA	CD5	69.64	344.0	0.468619247	0	nodrug	0.4556350806528465
89	GAGGAACAGAAGAACTTCCAGAGGAGGAGG	MED12	57.46	1251.0	0.795454545	0	AZD_200nM	0.6694770670686006
90	GAGGAACAGAAGAACTTCCAGAGGAGGAGG	MED12	57.46	1251.0	0.8560606059999999	1	PLX_2uM	0.6694770670686006
91	CAGCAACAGACAGCAGCTTTGGTCCGGCAA	MED12	98.99	2155.0	0.00974026	0	AZD_200nM	0.1708750175128909
92	CAGCAACAGACAGCAGCTTTGGTCCGGCAA	MED12	98.99	2155.0	0.03030303	0	PLX_2uM	0.1708750175128909
93	CCAGAACAGCAACGGTCGCCATGTTGGAGA	H2-K	82.66	305.0	0.426035503	0	nodrug	0.5072004451839539
94	CGCCAACAGCAGGAGCAGCGTGCACGGTAC	H2-K	1.36	5.0	0.7692307690000001	0	nodrug	0.6002272872934398
95	GTCAAACAGCTCACTGATCTGGGCCGGCGT	CD13	48.29	467.0	0.685714286	0	nodrug	0.5450770952809036
96	AGACAACAGCTGAAACAGCCTCCTCGGTGA	TADA1	50.75	170.0	0.834862385	1	AZD_200nM	0.5568530268936819
97	TGGAAACAGTCACAGAAGCTTTGTTGGAGA	NF1	77.81	2209.0	0.523097826	0	PLX_2uM	0.3545229735068057
98	CTGTAACAGTGGACGAACTCGCCACGGATC	NF1	99.12	2814.0	0.044836957000000004	0	PLX_2uM	0.24139256904600198
99	CATGAACATGACTCCCCGGAGGCCTGGGCT	CD28	89.91	196.0	0.054054054000000004	0	nodrug	0.24308282606995213
100	GGTCAACATGTCTCTTCTTAACCTTGGTCT	MED12	8.04	175.0	0.594155844	0	AZD_200nM	0.5011373614015928
101	GGTCAACATGTCTCTTCTTAACCTTGGTCT	MED12	8.04	175.0	0.6980519479999999	0	PLX_2uM	0.5011373614015928
102	TTATAACCAAAGAAAACTTGTATTTGGAAA	NF1	1.73	49.0	0.09239130400000001	0	PLX_2uM	0.1603345104847015
103	ATAGAACCAGGGTTTGGGTGGTGCAGGAGG	MED12	83.69	1822.0	0.386363636	0	AZD_200nM	0.3820730348122858
104	ATAGAACCAGGGTTTGGGTGGTGCAGGAGG	MED12	83.69	1822.0	0.37337662299999996	0	PLX_2uM	0.3820730348122858
105	TCAAAACCAGTGCAACAGGTGGCTTGGGAT	NF1	71.22	2022.0	0.214673913	0	PLX_2uM	0.3700717773941638
106	AAGCAACCCAAGACGTTCACCGTGAGGATC	NF2	4.03	24.0	0.892376682	1	PLX_2uM	0.685805422262064
107	CCCAAACCCAGCGGGCCTGGCCCCAGGCAC	CD5	75.91	375.0	0.054393305	0	nodrug	0.3809323068780741
108	CAGGAACCCCATGGTCTGGCCAGCTGGTGA	CD45	57.08	645.0	0.108303249	0	nodrug	0.45935474365282714
109	CTTCAACCCCTCAAAAAGATCCCAGGGCGA	MED12	77.58	1689.0	0.8008658009999999	1	AZD_200nM	0.5668920028610501
110	CTTCAACCCCTCAAAAAGATCCCAGGGCGA	MED12	77.58	1689.0	0.768398268	0	PLX_2uM	0.5668920028610501
111	ACACAACCGCCAAGGCCGATGCAGAGGCTG	CCDC101	23.89	70.0	0.932885906	1	AZD_200nM	0.5723678862250695
112	CATGAACCGCTGGACCCTGCAGATGGGCTT	CD13	56.46	546.0	0.363736264	0	nodrug	0.5852724436823862
113	CAAAAACCTAGCCGGCTCCAAACGGGGAAA	TADA2B	78.1	328.0	0.542105263	0	AZD_200nM	0.5919002076179043
114	CATAAACCTGATGTCTCTAGTAACTGGCCC	NF1	66.64	1892.0	0.50951087	0	PLX_2uM	0.3886417224629452
115	CACAAACCTGTGGCAGATACACACTGGTCC	NF1	54.88	1558.0	0.857336957	1	PLX_2uM	0.7121848839556527
116	CCAGAACGATCTCTTCAGCACATCAGGCAA	CD13	63.5	614.0	0.07802197799999999	0	nodrug	0.4119677088408929
117	CGGTAACGATTCCACGCTTTACTTTGGTCC	CD13	7.03	68.0	0.150549451	0	nodrug	0.3998991238503122
118	TTCGAACGCACCTCCTTCTGTTTGGGGTCC	MED12	1.38	30.0	0.15259740300000002	0	AZD_200nM	0.39933864592233476
119	TTCGAACGCACCTCCTTCTGTTTGGGGTCC	MED12	1.38	30.0	0.21645021600000003	0	PLX_2uM	0.39933864592233476
120	CAGAAACGCCTAAGCCTAGTTGTGGGGATC	CD45	19.56	221.0	0.83032491	1	nodrug	0.708602249072967
121	CGGGAACGCGACGCTGCTGCGCACAGGTGC	H2-K	54.74	202.0	0.526627219	0	nodrug	0.5197948337113282
122	TGACAACGCGTGAGAATGGCCAGGAGGAAA	TADA1	19.1	64.0	0.9724770640000001	1	AZD_200nM	0.6950101635564532
123	AATCAACGGAAGAACCAATTGTAAAGGTGG	CUL3	33.98	261.0	0.558441558	0	PLX_2uM	0.5783741794995475
124	AAACAACGGCCCAGGAGGGCGGCCAGGCGC	CD5	52.63	260.0	0.21338912100000001	0	nodrug	0.400783194637463
125	TAAAAACGTACAGGCCCCTGTCATTGGGGG	CD13	10.03	97.0	0.279120879	0	nodrug	0.40262694120436376
126	TGAAAACGTGGACGGCGGCGGACATGGCGG	H2-K	42.82	158.0	0.473372781	0	nodrug	0.4851404289145021
127	CCTTAACTACAGGCAAGGCTCCATAGGCCT	MED12	84.43	1838.0	0.296536797	0	AZD_200nM	0.46791802862334353
128	CCTTAACTACAGGCAAGGCTCCATAGGCCT	MED12	84.43	1838.0	0.32683982699999997	0	PLX_2uM	0.46791802862334353
129	TGGAAACTACTGAATTGTCTTCTTTGGAGA	CD43	21.27	84.0	0.065217391	0	nodrug	0.24326173260147355
130	TTTTAACTAGAATGACCAGTCAACAGGGGA	HPRT1	50.46	110.0	0.40625	0	6TG_2ug/mL	0.398066122908845
131	GTGGAACTCAGTGACATTCCAGTTGGGGTC	CD13	27.3	264.0	0.403296703	0	nodrug	0.47234880070959284
132	CAGAAACTGATGGGCTGGCATTCTGGGCTT	CD43	11.14	44.0	0.057971014	0	nodrug	0.321747486079785
133	GATGAACTGCACATGCTGCACCAGAGGCAA	MED12	39.96	870.0	0.49891774899999997	0	AZD_200nM	0.609625418351504
134	GATGAACTGCACATGCTGCACCAGAGGCAA	MED12	39.96	870.0	0.7218614720000001	0	PLX_2uM	0.609625418351504
135	ACAGAACTGGTTGCTGTGGTAGCAGGGAGT	CD43	51.9	205.0	0.8623188409999999	1	nodrug	0.5929168435215941
136	TTTCAACTGTCCCCTCAGGTGGGGAGGATG	MED12	37.16	809.0	0.067099567	0	AZD_200nM	0.47746205808227665
137	TTTCAACTGTCCCCTCAGGTGGGGAGGATG	MED12	37.16	809.0	0.06385281400000001	0	PLX_2uM	0.47746205808227665
138	AGCCAACTTCACCACCAAGGATGAGGGCGA	THY1	61.11	99.0	0.870967742	1	nodrug	0.616933131267643
139	GCTGAACTTCGGAATTCTGCCTCTGGGGTT	NF1	4.9	139.0	0.44701087	0	PLX_2uM	0.4328516959575935
140	CTCTAACTTTAACTTTGCATTGGTTGGACA	NF1	84.18	2390.0	0.20108695699999998	0	PLX_2uM	0.3360758786132965
141	CAAGAAGAAAATAAGAAGAAGAACAGGAAT	CD45	70.62	798.0	0.259927798	0	nodrug	0.39139742326759847
142	CTAAAAGAAACGATCGGTGACTTTTGGCAG	CD45	77.17	872.0	0.306859206	0	nodrug	0.3196097604646042
143	CAAGAAGAACTTAAGCGAGGCCCTGGGGGA	TADA1	5.37	18.0	0.944954128	1	AZD_200nM	0.567163101426208
144	TCGAAAGACAGGCTGTCACCAATGAGGTTG	NF2	84.2	501.0	0.587443946	0	PLX_2uM	0.632692758977932
145	AAGGAAGACTGGCGCATGGTCCACTGGTCC	MED12	62.2	1354.0	0.9837662340000001	1	AZD_200nM	0.5816193303149652
146	AAGGAAGACTGGCGCATGGTCCACTGGTCC	MED12	62.2	1354.0	0.993506494	1	PLX_2uM	0.5816193303149652
147	ATTGAAGAGAGACAGTACATGCCCTGGGAG	CD13	71.77	694.0	0.992307692	1	nodrug	0.5857518339310746
148	AGCGAAGAGCCAAGCAGAAGCTCCTGGAGA	NF2	79.33	472.0	0.340807175	0	PLX_2uM	0.3924092307469042
149	TAGGAAGAGCTGGGAGTCATCTGATGGACA	MED12	88.61	1929.0	0.29978355	0	AZD_200nM	0.45261782652197247
150	TAGGAAGAGCTGGGAGTCATCTGATGGACA	MED12	88.61	1929.0	0.449134199	0	PLX_2uM	0.45261782652197247
151	AGAGAAGAGGAAGCACGTGCTCTCAGGCAC	THY1	39.51	64.0	0.20967741899999998	0	nodrug	0.5048226135269286
152	GCCCAAGAGGAATTGCTTCCAAAAAGGGTA	NF2	28.74	171.0	0.21973094199999998	0	PLX_2uM	0.35351821972290276
153	GATGAAGATGAGAAGGAGAAACACAGGTAG	H2-K	90.51	334.0	0.165680473	0	nodrug	0.4769984452586012
154	AGGGAAGATGAGCTGCCACATCAAGGGAAT	NF1	73.79	2095.0	0.36820652200000004	0	PLX_2uM	0.5276122654962044
155	AGGTAAGATGTTTGGTATTGTGGTGGGGAT	NF1	94.96	2696.0	0.262228261	0	PLX_2uM	0.34982759142769204
156	TGTAAAGCAAGTACTTACATCAATTGGGAA	NF1	11.8	335.0	0.14945652199999998	0	PLX_2uM	0.34156284807548537
157	GGAAAAGCAGGTACGAGGCCAGGGAGGAGG	CD15	88.3	468.0	0.5970695970000001	0	nodrug	0.5413139521509915
158	CTGGAAGCAGTGCTGATGTCTTGCTGGAAA	CD43	27.59	109.0	0.384057971	0	nodrug	0.4585157290903393
159	GGCCAAGCATGGAGGAAGGCACTCGGGCTT	CD45	53.01	599.0	0.566787004	0	nodrug	0.6248557972715859
160	TCAAAAGCATGTCTTGGTGCTGGTGGGATG	CUL3	68.49	526.0	0.974025974	1	PLX_2uM	0.6333755611504969
161	TCGAAAGCCAGGTAGAACTTGTAGCGGGCC	CD15	76.79	407.0	0.6886446890000001	0	nodrug	0.6558550538464056
162	GCTGAAGCCCCTGGCGCTGGAACTGGGTGG	MED12	98.16	2137.0	0.051948052	0	AZD_200nM	0.048047398015562647
163	GCTGAAGCCCCTGGCGCTGGAACTGGGTGG	MED12	98.16	2137.0	0.023809524	0	PLX_2uM	0.048047398015562647
164	CTTCAAGCCCCTTTCGATTCTAGGTGGTGG	NF1	50.51	1434.0	0.9415760870000001	1	PLX_2uM	0.6760602397663041
165	CCAAAAGCCGCCTTCCTAGCTACCTGGACA	TADA2B	94.29	396.0	0.24210526300000001	0	AZD_200nM	0.4099898997233438
166	GTTGAAGCGCAGCCGGCAGTCAGGGGGCGG	CD15	39.62	210.0	0.582417582	0	nodrug	0.584514994931369
167	TTGTAAGCTACTACACTATTCTTCAGGTAT	TADA1	65.37	219.0	0.19266055	0	AZD_200nM	0.39476045267989474
168	AGAAAAGCTATTTGACTTGGTGGATGGTTT	NF1	8.91	253.0	0.774456522	0	PLX_2uM	0.6063964890124454
169	TGATAAGCTGAAAAAGGGAGTCAAAGGGGT	CUL3	52.08	400.0	0.324675325	0	PLX_2uM	0.5089672141907191
170	TACCAAGCTGGGACTTCCAAAGCTGGGAAT	NF1	56.39	1601.0	0.532608696	0	PLX_2uM	0.6759203760590436
171	CTCCAAGGACAACCAGAACAGCAACGGTCG	H2-K	83.74	309.0	0.591715976	0	nodrug	0.5836526308093724
172	GGCCAAGGACAGGCCCCTGGGCCTGGGGAA	CD5	39.47	195.0	0.025104603	0	nodrug	0.35472536797338716
173	GAGGAAGGAGAACAAAAACCTAGCCGGCTC	TADA2B	77.14	324.0	0.294736842	0	AZD_200nM	0.5454067862209092
174	CTCGAAGGAGACCATCAGCCCCTGGGGGCA	CD43	16.2	64.0	0.5579710139999999	0	nodrug	0.6331357199248662
175	GGGTAAGGAGATGTGGGAGTCAGGAGGGAT	NF1	97.08	2756.0	0.15625	0	PLX_2uM	0.17540148308600584
176	AAGCAAGGATACAGCGCTCTGCAGAGGAGC	MED12	44.42	967.0	0.756493506	0	AZD_200nM	0.6451792268201865
177	AAGCAAGGATACAGCGCTCTGCAGAGGAGC	MED12	44.42	967.0	0.8939393940000001	1	PLX_2uM	0.6451792268201865
178	ACTGAAGGCAGCTCTGAACATCTAGGGCAA	NF1	34.62	983.0	0.489130435	0	PLX_2uM	0.6157268994024162
179	CTACAAGGCCAAGGACAGGCCCCTGGGCCT	CD5	39.07	193.0	0.6861924690000001	0	nodrug	0.5850487977561747
180	AGCTAAGGCGACAGAGGTGTCTGATGGTGC	CD45	63.72	720.0	0.8953068590000001	1	nodrug	0.6464816007807989
181	TGGTAAGGCTGGCTGGAGTAGCTGGGGGGC	MED12	90.35	1967.0	0.226190476	0	AZD_200nM	0.2097459696263743
182	TGGTAAGGCTGGCTGGAGTAGCTGGGGGGC	MED12	90.35	1967.0	0.192640693	0	PLX_2uM	0.2097459696263743
183	CGCAAAGGGACAGCAGAAACTGGTGGGTTT	MED12	36.33	791.0	0.943722944	1	AZD_200nM	0.6590486916404167
184	CGCAAAGGGACAGCAGAAACTGGTGGGTTT	MED12	36.33	791.0	0.9188311690000001	1	PLX_2uM	0.6590486916404167
185	TAAAAAGGGCACAGAGCTGCTGCTTGGAGT	NF2	39.16	233.0	0.995515695	1	PLX_2uM	0.5779059576168712
186	CTGCAAGGTATCCTTCAGAACCTTTGGGAG	NF1	88.02	2499.0	0.332880435	0	PLX_2uM	0.34315695505067706
187	TGAAAAGGTGAAGGAGGATGCGGCAGGTAA	MED12	53.93	1174.0	0.961038961	1	AZD_200nM	0.6216470922681534
188	TGAAAAGGTGAAGGAGGATGCGGCAGGTAA	MED12	53.93	1174.0	0.9978354979999999	1	PLX_2uM	0.6216470922681534
189	AAACAAGGTGAATCCGACCCAGAGAGGAAA	CUL3	89.45	687.0	0.857142857	1	PLX_2uM	0.6193446209835572
190	GCCCAAGGTTCAGAGCCGCCTGGTCGGGGG	CD5	56.28	278.0	0.644351464	0	nodrug	0.5257021314355648
191	GCACAAGTAACTGGCTCTAATACACGGAAG	CUL3	76.43	587.0	0.883116883	1	PLX_2uM	0.6182077555144192
192	GTGGAAGTAGCGGCGATAGACCGCGGGGTT	CD15	90.75	481.0	0.564102564	0	nodrug	0.4579991598395823
193	TGCAAAGTCTCTGGCAGGGGCGTAGGGCTG	CD28	95.41	208.0	0.635135135	0	nodrug	0.4704458165622717
194	TGGAAAGTGCAGAAACAGAAGATGTGGTTG	CD45	90.09	1018.0	0.750902527	0	nodrug	0.5495129605147889
195	GCTGAAGTGCGCCAGAGATCACAGTGGGAG	CD5	59.92	296.0	0.669456067	0	nodrug	0.8238284330067072
196	TGAGAAGTTCTGCAATGCGGGAATCGGCAG	CCDC101	2.73	8.0	0.543624161	0	AZD_200nM	0.4500164909666838
197	TTCGAAGTTGAGGGGGGAATTCTGAGGAGG	NF1	47.76	1356.0	0.88451087	1	PLX_2uM	0.6218540638066491
198	CCAGAAGTTTGAGCCACAAACCCATGGTCA	CD45	0.35	4.0	0.841155235	1	nodrug	0.6837122272778907
199	GCAAAATAAATCAAGGTCATAACCTGGTTC	HPRT1	7.8	17.0	0.6875	0	6TG_2ug/mL	0.6225657192719443
200	TTTCAATAACCAGCCTGCTGTCTCTGGGGA	MED12	2.34	51.0	0.44696969700000005	0	AZD_200nM	0.39564516358222346
201	TTTCAATAACCAGCCTGCTGTCTCTGGGGA	MED12	2.34	51.0	0.41341991299999997	0	PLX_2uM	0.39564516358222346
202	GTAAAATAATGACATTCTGTTTCAAGGTTT	NF1	45.4	1289.0	0.014945652	0	PLX_2uM	0.3986052220658777
203	GCCAAATACACAGTGCCTGTGATGCGGGCT	MED12	7.07	154.0	0.958874459	1	AZD_200nM	0.6408428599686422
204	GCCAAATACACAGTGCCTGTGATGCGGGCT	MED12	7.07	154.0	0.9675324679999999	1	PLX_2uM	0.6408428599686422
205	GTTAAATAGCATTGGATACAGAGCAGGACT	NF1	32.72	929.0	0.9361413040000001	1	PLX_2uM	0.6034715730909512
206	AGACAATAGTATAAATGTTACATGTGGTCC	CD45	29.2	330.0	0.819494585	1	nodrug	0.7471209869028365
207	CTGCAATAGTCACTGGAGCTGTGGTGGCTT	H2-K	87.53	323.0	0.568047337	0	nodrug	0.5179235075068376
208	TGGAAATATAGAAGCCCTTGGCCATGGTGA	CD13	0.21	2.0	0.597802198	0	nodrug	0.567084079333408
209	GGCCAATATCCTGTCGTGAGCACCCGGACT	CUL3	66.02	507.0	0.961038961	1	PLX_2uM	0.5802073390867513
210	GCTCAATATCGCATTACTTAATTTAGGCAG	NF1	65.55	1861.0	0.932065217	1	PLX_2uM	0.3996393253822647
211	TCTGAATATCTCAAAAGCATGTCTTGGTGC	CUL3	69.01	530.0	0.298701299	0	PLX_2uM	0.5362805726075719
212	CAAAAATATGGGGAAGCCTTGGGCAGGTAT	NF1	70.48	2001.0	0.505434783	0	PLX_2uM	0.49128485638251984
213	TCCAAATATGTTGGTACTGGGCTGTGGCTG	MED12	99.63	2169.0	0.272727273	0	AZD_200nM	0.2098561542783104
214	TCCAAATATGTTGGTACTGGGCTGTGGCTG	MED12	99.63	2169.0	0.245670996	0	PLX_2uM	0.2098561542783104
215	AGAAAATCACCAAGGATATCTTGAAGGTTC	MED12	35.78	779.0	0.685064935	0	AZD_200nM	0.5480806149474501
216	AGAAAATCACCAAGGATATCTTGAAGGTTC	MED12	35.78	779.0	0.569264069	0	PLX_2uM	0.5480806149474501
217	CCTGAATCATAGACACCAGGTCTTTGGGTT	CD45	85.13	962.0	0.11552346599999999	0	nodrug	0.2792008946456548
218	AGTAAATCCACTTACCTATAGGAAGGGTCA	NF1	87.5	2484.0	0.951086957	1	PLX_2uM	0.5568610023084773
219	AGGAAATCCATGAGCCTGGACATGGGGCAA	NF1	88.97	2526.0	0.43070652200000004	0	PLX_2uM	0.45623915188569664
220	CTGCAATCCCACATGAGAAACATAAGGAGT	MED12	89.48	1948.0	0.25649350600000004	0	AZD_200nM	0.40898823792040256
221	CTGCAATCCCACATGAGAAACATAAGGAGT	MED12	89.48	1948.0	0.20129870100000002	0	PLX_2uM	0.40898823792040256
222	ATGAAATCCCAGTGCCTTACCCGCAGGATC	MED12	95.96	2089.0	0.003246753	0	AZD_200nM	0.24612752365505974
223	ATGAAATCCCAGTGCCTTACCCGCAGGATC	MED12	95.96	2089.0	0.004329004	0	PLX_2uM	0.24612752365505974
224	CAAAAATCCCCGCTTGTGAACACTGGGGTC	NF2	26.39	157.0	0.641255605	0	PLX_2uM	0.5246322273988262
225	TAGGAATCGGGTTTCAGCGTGTTGGGGAGG	CD13	8.07	78.0	0.6241758239999999	0	nodrug	0.6115119523419034
226	TGGCAATCTCCAGGAGCTTCTGCTTGGCTC	NF2	78.99	470.0	0.524663677	0	PLX_2uM	0.41326320894224294
227	CCAAAATCTGACAACGCGTGAGAATGGCCA	TADA1	20.0	67.0	0.926605505	1	AZD_200nM	0.5318701128579246
228	CTACAATCTGGTGCCAGCCTTCCTGGGGAA	TADA2B	55.24	232.0	0.136842105	0	AZD_200nM	0.49320085085265275
229	TTTGAATCTTGACTCTGTGTAGTTTGGATG	CUL3	87.11	669.0	0.123376623	0	PLX_2uM	0.31823340934572325
230	TGACAATGAAGGCCAGCAAGTACGTGGACA	CD13	28.75	278.0	0.817582418	1	nodrug	0.674729589119917
231	CAGGAATGACACCCACCCTACCACAGGGTC	CD33	82.97	302.0	0.235930736	0	nodrug	0.5400431623263491
232	TCATAATGACCAGCAAAGAAGTTAAGGATG	CD13	33.71	326.0	0.506593407	0	nodrug	0.4749053952747937
233	GTGGAATGACCTGTGGCTGAACGAGGGCTT	CD13	42.4	410.0	0.972527473	1	nodrug	0.7028734546024371
234	GCACAATGAGAACTCCGACAGGGGTGGCAG	NF2	95.46	568.0	0.09865470900000001	0	PLX_2uM	0.3315135794477191
235	CTCCAATGAGTGCCCAGGGCGTCCAGGCAG	MED12	93.62	2038.0	0.061688312	0	AZD_200nM	0.16313009324917457
236	CTCCAATGAGTGCCCAGGGCGTCCAGGCAG	MED12	93.62	2038.0	0.07359307400000001	0	PLX_2uM	0.16313009324917457
237	AAACAATGCAGACTTTGCTTTCCTTGGTCA	HPRT1	67.89	148.0	0.234375	0	6TG_2ug/mL	0.4229003851662691
238	CATTAATGCATCCTTTGTGATGGTAGGTAC	CD45	75.22	850.0	0.823104693	1	nodrug	0.5470504323363841
239	CTCGAATGCCGAGTTCAACTGCGACGGGGA	CD28	39.91	87.0	0.581081081	0	nodrug	0.5566997885638093
240	TTTTAATGGCTTGTGGCGGTTTGCAGGACC	NF1	95.6	2714.0	0.024456522	0	PLX_2uM	0.07631198817383045
241	TGTCAATGGGAAGATTCAAAGAAATGGGAC	CD45	26.11	295.0	0.223826715	0	nodrug	0.42517874466396083
242	CATCAATGTAGCTGGCATTTATGTAGGTGG	CD45	47.26	534.0	0.9386281590000001	1	nodrug	0.5928112452789396
243	TTGGAATGTCTCAGCTCAAAAGTTCGGAGA	CD45	82.21	929.0	0.927797834	1	nodrug	0.5565319564591609
244	CCAAAATGTTTCTACAGGAGCATCAGGATT	NF1	19.9	565.0	0.304347826	0	PLX_2uM	0.4750408552467292
245	AATTAATTACAGGGCTCGTCCAACTGGTCC	NF1	18.7	531.0	0.278532609	0	PLX_2uM	0.4888270601346906
246	TTTGAATTCTGTAGAAGTTATTTCTGGACA	NF1	10.53	299.0	0.23097826100000002	0	PLX_2uM	0.1884472719966013
247	CACAAATTGCTGGGCTCCTGAGAGAGGATT	TADA1	35.82	120.0	0.5504587160000001	0	AZD_200nM	0.6332125156658635
248	CCGAAATTGGGCTCCTGCACACAGTGGCCC	CD15	76.04	403.0	0.791208791	0	nodrug	0.6996437256889853
249	AACCAATTGTAAAGGTGGTTGAAAGGGAAC	CUL3	34.51	265.0	0.6038961039999999	0	PLX_2uM	0.5158039794178231
250	TCCAAATTTGTTAAATCCAATCCATGGAAT	NF1	94.43	2681.0	0.319293478	0	PLX_2uM	0.3401924289245903
251	GCAGACAAAGCTGTAGCGGTTAGCAGGGTT	MED12	48.19	1049.0	0.03030303	0	AZD_200nM	0.45511922744186595
252	GCAGACAAAGCTGTAGCGGTTAGCAGGGTT	MED12	48.19	1049.0	0.058441558	0	PLX_2uM	0.45511922744186595
253	AAGAACAAATTTGGGGAGCTCTTCAGGTAA	MED12	45.61	993.0	0.10173160199999999	0	AZD_200nM	0.2612863358388832
254	AAGAACAAATTTGGGGAGCTCTTCAGGTAA	MED12	45.61	993.0	0.094155844	0	PLX_2uM	0.2612863358388832
255	CGCCACAACAGCAGTAGCGCCACGAGGGCC	CD43	67.09	265.0	0.9637681159999999	1	nodrug	0.711198094464772
256	ATGAACAACAGGAACTCGTTGAAAGGGGTG	CD45	39.47	446.0	0.25631769	0	nodrug	0.5175943195661966
257	TCACACAACATTTATTCTTCTTACAGGTAC	NF2	20.17	120.0	0.10762331800000001	0	PLX_2uM	0.2873356144381009
258	GCCCACAACCATGACTGGCGTCATGGGTTT	MED12	86.59	1885.0	0.28030303	0	AZD_200nM	0.403630113502134
259	GCCCACAACCATGACTGGCGTCATGGGTTT	MED12	86.59	1885.0	0.279220779	0	PLX_2uM	0.403630113502134
260	CAGAACAAGAAGTAGAAACAATATTGGATA	CUL3	53.52	411.0	0.25974026	0	PLX_2uM	0.45213335028564394
261	GGAAACAAGAGACCAGAGCAGGAGTGGTTC	CD33	70.33	256.0	0.25108225100000003	0	nodrug	0.5308261980044098
262	ATCTACAAGAGTAGGATTGGTAGAAGGGTG	MED12	90.95	1980.0	0.13636363599999998	0	AZD_200nM	0.30538336435652125
263	ATCTACAAGAGTAGGATTGGTAGAAGGGTG	MED12	90.95	1980.0	0.12770562800000002	0	PLX_2uM	0.30538336435652125
264	GACAACAAGCTCTAACGAGACCAGTGGACC	CD43	42.78	169.0	0.7173913040000001	0	nodrug	0.7390069439779832
265	CTTAACAATAAGCTCAGCATAGTCTGGAAT	NF1	96.05	2727.0	0.42119565200000003	0	PLX_2uM	0.17287531117296218
266	CTCTACAATGACTCGGAGCCACCCCGGAAG	CCDC101	37.54	110.0	0.912751678	1	AZD_200nM	0.7470366691474717
267	CCACACAATGATGCTTCCCACTCGAGGCCA	TADA1	43.88	147.0	0.52293578	0	AZD_200nM	0.6840848385927725
268	GAAGACAATTCAGTAGTTTCCAAGGGGGTC	CD43	19.49	77.0	0.9492753620000001	1	nodrug	0.7210738524929549
269	TCAAACACAACGATGGATGAATTCAGGCAA	CUL3	63.41	487.0	0.88961039	1	PLX_2uM	0.3728315515163587
270	TATAACACACCTTAACTACAGGCAAGGCTC	MED12	84.29	1835.0	0.641774892	0	AZD_200nM	0.6175922600800373
271	TATAACACACCTTAACTACAGGCAAGGCTC	MED12	84.29	1835.0	0.576839827	0	PLX_2uM	0.6175922600800373
272	TCACACACACTGCTGCCCCCGACCAGGCGG	CD5	56.48	279.0	0.556485356	0	nodrug	0.565605697558185
273	TGGCACACACTTCGAAGTTGAGGGGGGAAT	NF1	47.87	1359.0	0.991847826	1	PLX_2uM	0.7291693015236465
274	TCTGACACAGACTCCCTACAGGAATGGATC	NF1	29.45	836.0	0.551630435	0	PLX_2uM	0.6357226762879846
275	CGGTACACATCATTCAGCACCATGAGGTCT	CD13	44.98	435.0	0.61978022	0	nodrug	0.7696596429970249
276	AGTCACACATGCCAGAGATTGCTCAGGAAG	NF1	19.09	542.0	0.804347826	1	PLX_2uM	0.6357840734485138
277	CAGAACACCATCTACCTGAACCTGTGGGAC	CD13	53.46	517.0	0.416483516	0	nodrug	0.6413991686765734
278	AACTACACCCTCAGCCAGGGGCACAGGGTG	CD13	13.96	135.0	0.571428571	0	nodrug	0.47722725134307464
279	CCTCACACCTTGCAGATCCGGATCTGGGCC	CD13	31.23	302.0	0.292307692	0	nodrug	0.34151836532853946
280	GCAAACACGGCTCCATCCACGATGCGGTTC	MED12	55.81	1215.0	0.825757576	1	AZD_200nM	0.7274687430954726
281	GCAAACACGGCTCCATCCACGATGCGGTTC	MED12	55.81	1215.0	0.730519481	0	PLX_2uM	0.7274687430954726
282	GTGCACACGGCTGCCACGCCCAGGAGGATC	CD13	1.86	18.0	0.542857143	0	nodrug	0.6666796006818949
283	CCGAACACGTCCACGGTCACATGTTGGCTC	CD15	71.7	380.0	0.725274725	0	nodrug	0.6518811446906055
284	GGAGACACTCACGGGTTATTATTGGGGTTC	CD13	81.08	784.0	0.47802197799999996	0	nodrug	0.5364060109555147
285	AGGCACACTCCCCCAAGGGCACAAAGGAAG	NF1	29.76	845.0	0.682065217	0	PLX_2uM	0.6433797751530765
286	GGTAACACTGAGACAGCTTCTCCTGGGCAC	CD5	69.64	344.0	0.623430962	0	nodrug	0.6077374337832094
287	GCAAACACTGCCGAGCGATGAGGATGGCAA	MED12	52.14	1135.0	0.9989177490000001	1	AZD_200nM	0.7039051622782082
288	GCAAACACTGCCGAGCGATGAGGATGGCAA	MED12	52.14	1135.0	0.9989177490000001	1	PLX_2uM	0.7039051622782082
289	GGATACACTGGAAAAATGTCTTGCTGGGGT	NF1	3.31	94.0	0.082880435	0	PLX_2uM	0.3316709805090226
290	TGAAACACTTCATAAAGCAGTGCAAGGTTG	NF1	15.89	451.0	0.614130435	0	PLX_2uM	0.6676819457455775
291	ACTGACACTTCATCCACCCCACACCGGATA	NF1	25.4	721.0	0.346467391	0	PLX_2uM	0.720833882199213
292	AGGCACAGAACAACCCTGTCTGCTGGGATC	CD45	88.5	1000.0	0.5595667870000001	0	nodrug	0.5148935777112406
293	AAGTACAGAAGAAGCTGACCATAGAGGAGT	NF1	23.49	667.0	0.273097826	0	PLX_2uM	0.5829872046019974
294	GTGTACAGAAGTAGGCAAGCCGGCGGGACA	MED12	13.6	296.0	0.924242424	1	AZD_200nM	0.6921197065801304
295	GTGTACAGAAGTAGGCAAGCCGGCGGGACA	MED12	13.6	296.0	0.87012987	1	PLX_2uM	0.6921197065801304
296	ATCCACAGACAAGCTGGTCAAGTGTGGCGG	THY1	80.25	130.0	0.629032258	0	nodrug	0.6191257045890104
297	CTGGACAGACATGAGTTCCTGACCTGGGTG	MED12	11.76	256.0	0.896103896	1	AZD_200nM	0.6429209303373902
298	CTGGACAGACATGAGTTCCTGACCTGGGTG	MED12	11.76	256.0	0.885281385	1	PLX_2uM	0.6429209303373902
299	CGTGACAGACCACACCTGTCCCAGCGGAGG	TADA2B	32.86	138.0	0.9684210529999999	1	AZD_200nM	0.7388738417648991
300	GTACACAGAGGTCTTATAAGAGGAGGGTTC	MED12	86.91	1892.0	0.7012987009999999	0	AZD_200nM	0.5811041625224554
301	GTACACAGAGGTCTTATAAGAGGAGGGTTC	MED12	86.91	1892.0	0.581168831	0	PLX_2uM	0.5811041625224554
302	GTGTACAGATCATAGAGATAAGCAAGGATA	MED12	44.69	973.0	0.906926407	1	AZD_200nM	0.7289615539580673
303	GTGTACAGATCATAGAGATAAGCAAGGATA	MED12	44.69	973.0	0.86038961	1	PLX_2uM	0.7289615539580673
304	CCCCACAGCCCCAGGATGACTACTCGGTCC	CCDC101	88.74	260.0	0.66442953	0	AZD_200nM	0.5449344733824664
305	GGATACAGCTGAGGCCAAAAACCAGGGGCC	MED12	16.49	359.0	0.873376623	1	AZD_200nM	0.6504606956368192
306	GGATACAGCTGAGGCCAAAAACCAGGGGCC	MED12	16.49	359.0	0.9556277059999999	1	PLX_2uM	0.6504606956368192
307	TGAGACAGCTTCTCCTGGGCACAGAGGAAC	CD5	69.03	341.0	0.769874477	0	nodrug	0.6958696087008137
308	TCAAACAGGACCGAGTAGTCATCCTGGGGC	CCDC101	88.05	258.0	0.684563758	0	AZD_200nM	0.5602754690847437
309	TCACACAGGACTATGGAATGGGCCCGGGTC	MED12	82.91	1805.0	0.624458874	0	AZD_200nM	0.4768840646394549
310	TCACACAGGACTATGGAATGGGCCCGGGTC	MED12	82.91	1805.0	0.667748918	0	PLX_2uM	0.4768840646394549
311	TCTGACAGGAGCTCGAAGCCTGGAAGGTTC	TADA2B	82.38	346.0	0.557894737	0	AZD_200nM	0.5744039112359147
312	TGTCACAGGATTGGCTGCAGTGACAGGAGG	CD43	32.15	127.0	0.355072464	0	nodrug	0.49307505351716074
313	GCTCACAGGCCCAGGACACAGAGCAGGTCA	CD33	45.05	164.0	0.484848485	0	nodrug	0.5940261973036423
314	ACTCACAGGCCCCCACCCCTCTGTGGGGCC	CCDC101	49.49	145.0	0.08724832199999999	0	AZD_200nM	0.43588395666767654
315	AGAGACAGGCGGAGATTGAGGCTGAGGTTA	MED12	24.71	538.0	0.25865800899999997	0	AZD_200nM	0.5162533672673856
316	AGAGACAGGCGGAGATTGAGGCTGAGGTTA	MED12	24.71	538.0	0.19047619	0	PLX_2uM	0.5162533672673856
317	AGTGACAGGGACCTTATGGGCACTGGGAAT	CD13	69.39	671.0	0.6879120879999999	0	nodrug	0.5930566028507467
318	TTGGACAGGGCTGTCAGGTCCTTGGGGTGG	CD13	24.92	241.0	0.796703297	0	nodrug	0.60537457444322
319	GTCAACAGGGGACATAAAAGTAATTGGTGG	HPRT1	53.21	116.0	0.203125	0	6TG_2ug/mL	0.40333140302986503
320	AACCACAGGGGATGCGGAACTGAAAGGTTC	MED12	56.73	1235.0	0.613636364	0	AZD_200nM	0.638846371784219
321	AACCACAGGGGATGCGGAACTGAAAGGTTC	MED12	56.73	1235.0	0.621212121	0	PLX_2uM	0.638846371784219
322	GGAAACAGGGGCTGGTGGCATGGGTGGTGA	CD15	67.74	359.0	0.37728937700000004	0	nodrug	0.46459885877713303
323	AGGCACAGGTCATCTTAATGAGCCAGGCAG	MED12	7.3	159.0	0.8787878790000001	1	AZD_200nM	0.6060346615538299
324	AGGCACAGGTCATCTTAATGAGCCAGGCAG	MED12	7.3	159.0	0.8712121209999999	1	PLX_2uM	0.6060346615538299
325	ACTTACAGGTGACGTTGAGCTGGATGGTTC	CD33	62.64	228.0	0.7510822509999999	0	nodrug	0.5828453036215752
326	TACAACAGTAAGCTCCAAGACCAGTGGTCC	CD43	46.08	182.0	0.615942029	0	nodrug	0.7414279087385268
327	AGGCACAGTATATCCTGATTCATCAGGCTT	CD45	64.78	732.0	0.23465704	0	nodrug	0.5076730395405603
328	TCTTACAGTCCGGGTGCTCACGACAGGATA	CUL3	66.28	509.0	0.922077922	1	PLX_2uM	0.5800066861558795
329	GGAGACAGTGGATGGAGGAGGCTCTGGGAA	H2-K	80.49	297.0	0.029585799	0	nodrug	0.2875153504775556
330	AGTTACAGTTATAGATATAGACTGCGGAGA	NF1	59.07	1677.0	0.976902174	1	PLX_2uM	0.7548446954810789
331	TGTGACAGTTCTGCAGCCAGGGGCCGGGGA	CD5	62.35	308.0	0.380753138	0	nodrug	0.423392884543256
332	TGACACATACCTGCAGTAGCTTCCTGGCAT	MED12	20.49	446.0	0.46645021600000003	0	AZD_200nM	0.45833270305195095
333	TGACACATACCTGCAGTAGCTTCCTGGCAT	MED12	20.49	446.0	0.40043290000000004	0	PLX_2uM	0.45833270305195095
334	TGCCACATACCTGCTGGGAACGCTGGGTGA	CD5	3.24	16.0	0.728033473	0	nodrug	0.5941336609338248
335	ACTTACATAGCTGCACACCACCCCAGGCCG	CD45	91.68	1036.0	0.870036101	1	nodrug	0.5470082830005383
336	GTGAACATCCAGAAGACCCATGAGCGGATG	CCDC101	14.68	43.0	0.5838926170000001	0	AZD_200nM	0.7301182991524469
337	ATCCACATCGACTGCTGGACAATGAGGATG	MED12	61.23	1333.0	0.754329004	0	AZD_200nM	0.6749685240767169
338	ATCCACATCGACTGCTGGACAATGAGGATG	MED12	61.23	1333.0	0.739177489	0	PLX_2uM	0.6749685240767169
339	GTAAACATCGGGAGGCCCCAGCCGCGGCCG	MED12	0.87	19.0	0.48376623399999996	0	AZD_200nM	0.6007981595716417
340	GTAAACATCGGGAGGCCCCAGCCGCGGCCG	MED12	0.87	19.0	0.411255411	0	PLX_2uM	0.6007981595716417
341	CTCGACATCTGGCTTCTCAGGGGATGGACT	MED12	32.2	701.0	0.581168831	0	AZD_200nM	0.5369569983716291
342	CTCGACATCTGGCTTCTCAGGGGATGGACT	MED12	32.2	701.0	0.613636364	0	PLX_2uM	0.5369569983716291
343	AGGTACATGAAAAAGAAGAATTCAAGGCTT	NF1	55.79	1584.0	0.917119565	1	PLX_2uM	0.542828871726444
344	GACTACATGAACATGACTCCCCGGAGGCCT	CD28	89.45	195.0	0.8243243240000001	1	nodrug	0.6465818079457488
345	ATGAACATGACTCCCCGGAGGCCTGGGCTC	CD28	90.37	197.0	0.10810810800000001	0	nodrug	0.34927741118107514
346	TTACACATGCCATGTGTACCATCAGGGGCT	H2-K	76.96	284.0	0.639053254	0	nodrug	0.5993645492119234
347	TGGAACATGCCTCCTTCTTGAAGATGGAAT	MED12	76.8	1672.0	0.156926407	0	AZD_200nM	0.43519452533165487
348	TGGAACATGCCTCCTTCTTGAAGATGGAAT	MED12	76.8	1672.0	0.173160173	0	PLX_2uM	0.43519452533165487
349	CAGGACATGGAGCTTGTGGAGACCAGGCCT	H2-K	68.83	254.0	0.047337277999999997	0	nodrug	0.45204347376385146
350	CCACACATGGCCAGCAGCACCACCAGGAGT	CD5	78.95	390.0	0.661087866	0	nodrug	0.5622325235383449
351	TAACACATGTCCCTGGACTGAGGTGGGCAG	MED12	66.05	1438.0	0.7370129870000001	0	AZD_200nM	0.6683284222191603
352	TAACACATGTCCCTGGACTGAGGTGGGCAG	MED12	66.05	1438.0	0.672077922	0	PLX_2uM	0.6683284222191603
353	AGGGACATGTGTTAAAGGCTGCTGGGGAAG	MED12	66.47	1447.0	0.39718614700000004	0	AZD_200nM	0.642757257665213
354	AGGGACATGTGTTAAAGGCTGCTGGGGAAG	MED12	66.47	1447.0	0.39285714299999996	0	PLX_2uM	0.642757257665213
355	AGTGACATTCCAGTTGGGGTCTTCTGGAAG	CD13	26.99	261.0	0.064835165	0	nodrug	0.21488534517497765
356	TGTAACATTTATACTATTGTCTGTCGGCCG	CD45	28.67	324.0	0.971119134	1	nodrug	0.6341377210637386
357	GCAAACCAAAGCAGCTTATGCATGAGGCAC	MED12	70.28	1530.0	0.742424242	0	AZD_200nM	0.6383139085048366
358	GCAAACCAAAGCAGCTTATGCATGAGGCAC	MED12	70.28	1530.0	0.645021645	0	PLX_2uM	0.6383139085048366
359	ACTAACCAAGCAACTTCTTAGTGTTGGCCT	NF1	89.26	2534.0	0.277173913	0	PLX_2uM	0.39049762550725775
360	CGATACCAAGGGCAACAAGATTGCTGGCTT	MED12	76.48	1665.0	0.35714285700000004	0	AZD_200nM	0.40555726826091526
361	CGATACCAAGGGCAACAAGATTGCTGGCTT	MED12	76.48	1665.0	0.414502165	0	PLX_2uM	0.40555726826091526
362	GTGAACCAAGTGTTAATGGCACTCTGGGAT	MED12	5.1	111.0	0.5476190479999999	0	AZD_200nM	0.5170486449182069
363	GTGAACCAAGTGTTAATGGCACTCTGGGAT	MED12	5.1	111.0	0.548701299	0	PLX_2uM	0.5170486449182069
364	ACGGACCAATGTTAAGGATCTGGTGGGTCT	NF1	32.41	920.0	0.864130435	1	PLX_2uM	0.6716086478751937
365	AGCTACCACAACGAAGCAAACATGTGGTAA	CD45	3.45	39.0	0.231046931	0	nodrug	0.7171882258150823
366	TGAAACCACAAGTGCCATTGTTAGAGGAGC	MED12	50.71	1104.0	0.688311688	0	AZD_200nM	0.5039623026761908
367	TGAAACCACAAGTGCCATTGTTAGAGGAGC	MED12	50.71	1104.0	0.624458874	0	PLX_2uM	0.5039623026761908
368	CTCTACCACACACACCTGAGGCCCCGGCCC	MED12	79.56	1732.0	0.516233766	0	AZD_200nM	0.5181585620291467
369	CTCTACCACACACACCTGAGGCCCCGGCCC	MED12	79.56	1732.0	0.518398268	0	PLX_2uM	0.5181585620291467
370	TGTCACCACAGCTACTGGGTCTCTGGGGCC	CD43	48.86	193.0	0.492753623	0	nodrug	0.46712157277568994
371	GTTTACCACAGGCGAGGGACTGTAGGGCTC	CUL3	82.29	632.0	0.87012987	1	PLX_2uM	0.5279474357351279
372	ACTTACCACATGTTTGCTTCGTTGTGGTAG	CD45	3.19	36.0	0.20938628199999998	0	nodrug	0.5754600376293323
373	AACCACCACCAAGGCAATAAGCATGGGCAC	CD43	64.56	255.0	0.710144928	0	nodrug	0.6448940507886904
374	TTCCACCACCGCGACCTCGTGAAGGGGCCC	CD15	46.04	244.0	0.736263736	0	nodrug	0.6358113640852395
375	ACCCACCACCGTGCCGGAGCCCACAGGTAA	CD5	30.97	153.0	0.6276150629999999	0	nodrug	0.6163996220887914
376	CCCTACCACTGGCCACTGTAACAGTGGACG	NF1	98.94	2809.0	0.118206522	0	PLX_2uM	0.1814834991795189
377	GGCAACCAGAACAGCTTCAGTGTCAGGGTT	NF1	24.66	700.0	0.33423913	0	PLX_2uM	0.3980617625669606
378	AGAGACCAGAGCAGGAGTGGTTCATGGGGC	CD33	70.88	258.0	0.463203463	0	nodrug	0.4237995913616226
379	ATACACCAGAGCGCTCTAGAGAGCTGGAGA	MED12	65.18	1419.0	0.680735931	0	AZD_200nM	0.5743392360737407
380	ATACACCAGAGCGCTCTAGAGAGCTGGAGA	MED12	65.18	1419.0	0.5844155839999999	0	PLX_2uM	0.5743392360737407
381	AATGACCAGCAAAGAAGTTAAGGATGGGGC	CD13	33.61	325.0	0.686813187	0	nodrug	0.5676757691348076
382	GGAAACCAGCATGCAGCTGAACTTCGGAAT	NF1	4.72	134.0	0.658967391	0	PLX_2uM	0.529494869099205
383	GGACACCAGCTCCTGCAGAGCTGAGGGACC	CD5	45.95	227.0	0.117154812	0	nodrug	0.5566816145181257
384	CTTCACCAGCTTCTTGTAGACCAGAGGACC	CD5	80.97	400.0	0.820083682	1	nodrug	0.6000693366740667
385	CCCGACCAGGCGGCTCTGAACCTTGGGCTG	CD5	55.47	274.0	0.5230125520000001	0	nodrug	0.39063495736462134
386	TGTCACCAGGCTTCCCGATCCACAGGGGCA	CCDC101	45.39	133.0	0.55704698	0	AZD_200nM	0.6129706452433696
387	AGACACCAGGTCTTTGGGTTCTGCAGGCAG	CD45	84.87	959.0	0.436823105	0	nodrug	0.41517029721182197
388	GTGTACCAGTACCAGTGTACCACATGGAAA	CD45	84.07	950.0	0.620938628	0	nodrug	0.6280335572781546
389	AAGAACCAGTCACCTTTCACTTCTTGGCCA	NF2	16.13	96.0	0.053811659000000005	0	PLX_2uM	0.19214783621663215
390	CAAAACCAGTGCAACAGGTGGCTTGGGATC	NF1	71.22	2022.0	0.23233695699999998	0	PLX_2uM	0.31881124251351306
391	CACGACCAGTGCCCAAAACAGCTTAGGAGA	CD28	68.81	150.0	0.837837838	1	nodrug	0.5349834829576534
392	CAGTACCAGTGTACCACATGGAAAGGGGAA	CD45	84.25	952.0	0.584837545	0	nodrug	0.45236729266247777
393	GAGCACCATGTCGAATCTGAGCAAAGGCAC	CUL3	0.65	5.0	0.12987013	0	PLX_2uM	0.5269383177792875
394	CTCCACCATTCTATAGGAATAAGATGGTAG	NF1	36.63	1040.0	0.311141304	0	PLX_2uM	0.5282556896784714
395	CTCCACCCACAGGCTGTGAACAACCGGTCC	CD13	54.5	527.0	0.254945055	0	nodrug	0.43521656152754973
396	CTAGACCCACCAGATCCTTAACATTGGTCC	NF1	32.3	917.0	0.7785326090000001	0	PLX_2uM	0.6390102850915433
397	TCCGACCCAGAGAGGAAAGAAACAAGGCAG	CUL3	89.97	691.0	0.74025974	0	PLX_2uM	0.5281654561814806
398	CAGCACCCAGGTACTCCACGTAGGAGGCGA	CD13	43.02	416.0	0.832967033	1	nodrug	0.6610576087819988
399	AGAGACCCAGTAGCTGTGGTGACAGGGGGA	CD43	47.34	187.0	0.608695652	0	nodrug	0.5535652871675782
400	ATCCACCCAGTGACCCCTCCCCTCTGGAGG	CD45	68.05	769.0	0.483754513	0	nodrug	0.4406618778485561
401	AATCACCCCACGGCCCCAGGACCACGGCAC	CD33	56.32	205.0	0.5173160170000001	0	nodrug	0.5665236980540884
402	TTCCACCCGCTCACTCTCACTTCGAGGGTC	MED12	26.92	586.0	0.151515152	0	AZD_200nM	0.5012500047942448
403	TTCCACCCGCTCACTCTCACTTCGAGGGTC	MED12	26.92	586.0	0.145021645	0	PLX_2uM	0.5012500047942448
404	GCGGACCCTCGAAGTGAGAGTGAGCGGGTG	MED12	27.06	589.0	0.67965368	0	AZD_200nM	0.6106955471510941
405	GCGGACCCTCGAAGTGAGAGTGAGCGGGTG	MED12	27.06	589.0	0.692640693	0	PLX_2uM	0.6106955471510941
406	TGTTACCCTCTGGCATGGGCAGGTTGGACG	MED12	18.56	404.0	0.946969697	1	AZD_200nM	0.6279195442197293
407	TGTTACCCTCTGGCATGGGCAGGTTGGACG	MED12	18.56	404.0	0.9523809520000001	1	PLX_2uM	0.6279195442197293
408	GAGCACCCTCTTACCTGTGGGCTCCGGCAC	CD5	30.97	153.0	0.30125523	0	nodrug	0.4942743544627995
409	CATCACCCTGACCTGGCAGTTGAATGGGGA	H2-K	65.04	240.0	0.284023669	0	nodrug	0.4193716689604394
410	AGTCACCCTGAGGTGCTGGGCCCTGGGCTT	H2-K	61.25	226.0	0.15976331400000002	0	nodrug	0.42849178870131527
411	GATGACCCTGTCTCTGCTGACTGTTGGAAA	MED12	63.94	1392.0	0.024891775	0	AZD_200nM	0.3671209813445843
412	GATGACCCTGTCTCTGCTGACTGTTGGAAA	MED12	63.94	1392.0	0.020562771	0	PLX_2uM	0.3671209813445843
413	GAGCACCGAGGAGTGAGTAGTCCTGGGGCC	CD33	52.47	191.0	0.614718615	0	nodrug	0.5454269938872068
414	GAACACCGGCCCCTGAAGCGGCCGCGGCTG	MED12	0.78	17.0	0.071428571	0	AZD_200nM	0.40919404595141234
415	GAACACCGGCCCCTGAAGCGGCCGCGGCTG	MED12	0.78	17.0	0.031385281	0	PLX_2uM	0.40919404595141234
416	TCTTACCGGTGCCATTCGTATTGCTGGGTG	NF1	16.2	460.0	0.046195652000000004	0	PLX_2uM	0.27534779994290265
417	TGTGACCGTGGACGTGTTCGGCCGGGGCGG	CD15	73.02	387.0	0.882783883	1	nodrug	0.4943614490378044
418	GGGCACCGTGGGGCTCGCCGACGGCGGCGG	CD15	25.28	134.0	0.406593407	0	nodrug	0.4986283307544793
419	TGGGACCTAGCAAGGATGGGCATGAGGTAA	MED12	22.69	494.0	0.793290043	0	AZD_200nM	0.6438603549062363
420	TGGGACCTAGCAAGGATGGGCATGAGGTAA	MED12	22.69	494.0	0.788961039	0	PLX_2uM	0.6438603549062363
421	AAATACCTCAGCGAGTGTGGGCCTGGGGGC	H2-K	5.96	22.0	0.059171598	0	nodrug	0.4824440287828346
422	GCATACCTCAGTGTTTCCTGCAGTGGGATG	NF1	27.16	771.0	0.16576087	0	PLX_2uM	0.5480140898739
423	GCTTACCTCATGCCCATCCTTGCTAGGTCC	MED12	22.55	491.0	0.755411255	0	AZD_200nM	0.5504078272415819
424	GCTTACCTCATGCCCATCCTTGCTAGGTCC	MED12	22.55	491.0	0.795454545	0	PLX_2uM	0.5504078272415819
425	GGCGACCTCCAGCCCCAGGCCCCCGGGCCA	CD15	54.15	287.0	0.487179487	0	nodrug	0.46017664349175363
426	TGCCACCTCTACATCATGGGGCAAGGGCCC	MED12	10.24	223.0	0.803030303	1	AZD_200nM	0.5764398700233591
427	TGCCACCTCTACATCATGGGGCAAGGGCCC	MED12	10.24	223.0	0.877705628	1	PLX_2uM	0.5764398700233591
428	AAGGACCTCTTTGATTTGGTGTGCCGGACT	NF2	8.57	51.0	0.65470852	0	PLX_2uM	0.4782534137113885
429	AAAAACCTGACCTGCTCTGTGTCCTGGGCC	CD33	45.6	166.0	0.454545455	0	nodrug	0.43337289043681454
430	CTGTACCTGAGCCTACTGCCTCTCAGGAAG	CD43	26.08	103.0	0.579710145	0	nodrug	0.49668202097048236
431	CCTCACCTGCTCCTCAAACTTCGACGGAGA	CD45	58.5	661.0	0.16967509	0	nodrug	0.5932952016961683
432	TGCTACCTGGTATTCAGCCTCCAGAGGGGA	CD45	68.23	771.0	0.7797833940000001	0	nodrug	0.568917324687608
433	GGGAACCTGGTGACCATAGAGTGGTGGAAT	CD13	41.68	403.0	0.9714285709999999	1	nodrug	0.7040988189344703
434	GGTGACCTGGTGGTTATGGGATCTTGGGTA	CD43	59.49	235.0	0.18840579699999999	0	nodrug	0.2855362323447146
435	CCTGACCTGTCAGGTGAAGTTCGCTGGAGC	CD33	59.34	216.0	0.346320346	0	nodrug	0.4342608342522555
436	AATGACCTGTCCCGGTAACTGGAACGGAAG	NF1	76.79	2180.0	0.645380435	0	PLX_2uM	0.526273852809413
437	TCTTACCTGTGGGCTCCGGCACGGTGGTGG	CD5	30.36	150.0	0.37656903799999997	0	nodrug	0.5973732154701076
438	GTTCACCTTAACCATTGCAAACCAGGGCAC	NF1	63.58	1805.0	0.70923913	0	PLX_2uM	0.6874430180105672
439	TCACACCTTCACCTACACGGGGCTAGGCAA	MED12	47.68	1038.0	0.761904762	0	AZD_200nM	0.5923423637777174
440	TCACACCTTCACCTACACGGGGCTAGGCAA	MED12	47.68	1038.0	0.651515152	0	PLX_2uM	0.5923423637777174
441	TACAACCTTCTCGCAAAGGAATTCCGGGCA	CD28	23.85	52.0	0.175675676	0	nodrug	0.31351083999060203
442	TTGTACCTTTAATTTAAAAATCGAGGGCCA	NF1	66.5	1888.0	0.252717391	0	PLX_2uM	0.4585876410855135
443	GGTGACGAAATACCTCAGCGAGTGTGGGCC	H2-K	6.78	25.0	0.34911242600000003	0	nodrug	0.5105636564035856
444	AGCTACGAACACCGGCCCCTGAAGCGGCCG	MED12	0.69	15.0	0.520562771	0	AZD_200nM	0.6362856157676328
445	AGCTACGAACACCGGCCCCTGAAGCGGCCG	MED12	0.69	15.0	0.42965368	0	PLX_2uM	0.6362856157676328
446	GACTACGACCCCAGTGTTCACAAGCGGGGA	NF2	26.72	159.0	0.99103139	1	PLX_2uM	0.6961492872194798
447	GAGTACGAGGCAGCGCGGCATAAACGGGAG	TADA2B	74.76	314.0	0.052631579000000005	0	AZD_200nM	0.32038813938163935
448	AGCAACGAGGTCAGCCTCAGCTGCAGGTAT	CD28	18.81	41.0	0.567567568	0	nodrug	0.5627434064846929
449	TCACACGATGTGAAGAAGGAAACAGGGTAA	CD45	51.68	584.0	0.884476534	1	nodrug	0.7177750723489711
450	CTCTACGCAAAGCACGGCCTGGGGTGGTGT	CD45	91.59	1035.0	0.545126354	0	nodrug	0.5056658268189637
451	AGGAACGCAAGAAGAAGTCCACCAAGGGCA	MED12	82.09	1787.0	0.635281385	0	AZD_200nM	0.626482828849642
452	AGGAACGCAAGAAGAAGTCCACCAAGGGCA	MED12	82.09	1787.0	0.7716450220000001	0	PLX_2uM	0.626482828849642
453	GGCCACGCAGCTTTGTCCGGTAATAGGGAG	CCDC101	18.77	55.0	0.127516779	0	AZD_200nM	0.307841831971238
454	TTCAACGCCGGCGCCATGGAGAACTGGGGA	CD13	36.81	356.0	0.3	0	nodrug	0.34300969169875
455	TAGGACGCGCGGTCGGTGAGCAGGCGGCAG	CD15	41.89	222.0	0.908424908	1	nodrug	0.6723832948612684
456	TGTCACGCGGTTGGGGATGGTGTCGGGGAT	TADA2B	30.24	127.0	0.226315789	0	AZD_200nM	0.29008555301433653
457	CGGTACGCTGCAAAGTCTCTGGCAGGGGCG	CD28	96.33	210.0	0.621621622	0	nodrug	0.4986931769474364
458	AAATACGGACCAATGTTAAGGATCTGGTGG	NF1	32.37	919.0	0.6875	0	PLX_2uM	0.5075903633759566
459	GTACACGGAGACTGGCCCTGCAGCTGGATG	MED12	14.15	308.0	0.20995671	0	AZD_200nM	0.5191266081570962
460	GTACACGGAGACTGGCCCTGCAGCTGGATG	MED12	14.15	308.0	0.35173160200000003	0	PLX_2uM	0.5191266081570962
461	GACCACGGCCTGGACCCATTCCACCGGCCT	NF1	0.28	8.0	0.366847826	0	PLX_2uM	0.594446038893725
462	ACTGACGGCCTTGAATGTAAAACAAGGTTT	MED12	1.93	42.0	0.865800866	1	AZD_200nM	0.6712142502980631
463	ACTGACGGCCTTGAATGTAAAACAAGGTTT	MED12	1.93	42.0	0.82034632	1	PLX_2uM	0.6712142502980631
464	GTGGACGGCGGGCGCTTCACGCTCTGGGGG	TADA2B	14.52	61.0	0.626315789	0	AZD_200nM	0.3091922924668343
465	GCGGACGGGGTGGTGGAGGCCACGGGGGAG	CD13	4.76	46.0	0.585714286	0	nodrug	0.4875423456895451
466	GGGGACGGTGGGAAGAGCTATGTCGGGAGC	CD5	63.97	316.0	0.7907949790000001	0	nodrug	0.6112476412896809
467	AAAAACGTACAGGCCCCTGTCATTGGGGGT	CD13	10.03	97.0	0.20439560399999998	0	nodrug	0.3966389341642597
468	CATTACGTGAGCATGTACATCCACGGGAAC	TADA2B	27.62	116.0	0.9526315790000001	1	AZD_200nM	0.6412142445331532
469	AAGCACGTGCTCTCAGGCACCCTTGGGATA	THY1	41.98	68.0	0.387096774	0	nodrug	0.5570274192136324
470	GTCCACGTGGATGAAGGCGCCGCGGGGCAC	CD15	85.66	454.0	0.9963369959999999	1	nodrug	0.6432331853653754
471	GGAAACGTGGCATGTCTCGGAGGCTGGCAT	NF1	40.05	1137.0	0.567934783	0	PLX_2uM	0.5084971983822911
472	CGGTACGTGTGCTCGGGTATCCCAAGGGTG	THY1	42.59	69.0	0.419354839	0	nodrug	0.5367764276534638
473	TTGAACGTTATTATAAACAACACTTGGCAA	CUL3	56.64	435.0	0.5129870129999999	0	PLX_2uM	0.55287724203212
474	CCTTACGTTCACTGACTGGACCCATGGGTG	NF1	30.57	868.0	0.224184783	0	PLX_2uM	0.5429823237571325
475	TTCAACGTTCTCCTTGTCGATTCCTGGAGA	NF1	98.41	2794.0	0.010869565	0	PLX_2uM	0.044583354882620864
476	GGAGACGTTGTCGTAAGCAAAGCCAGGAAA	NF1	58.79	1669.0	0.331521739	0	PLX_2uM	0.6399845946447528
477	TCTTACTAATAGAGACAATAAAGAGGGTGT	NF1	67.17	1907.0	0.595108696	0	PLX_2uM	0.6206029466860098
478	AGCTACTACACTATTCTTCAGGTATGGCTG	TADA1	65.07	218.0	0.651376147	0	AZD_200nM	0.5712885770491039
479	AGTGACTACATGAACATGACTCCCCGGAGG	CD28	88.99	194.0	0.7027027029999999	0	nodrug	0.5737588942318009
480	GTGAACTACGACGAAGAGAACTGGAGGAAG	CD13	66.08	639.0	0.97032967	1	nodrug	0.7272135241956276
481	TTTAACTAGAATGACCAGTCAACAGGGGAC	HPRT1	50.92	111.0	0.734375	0	6TG_2ug/mL	0.6290571309487075
482	AGGCACTAGGACAGCACAGGAGGATGGTCT	MED12	17.0	370.0	0.42965368	0	AZD_200nM	0.6650307885783202
483	AGGCACTAGGACAGCACAGGAGGATGGTCT	MED12	17.0	370.0	0.436147186	0	PLX_2uM	0.6650307885783202
484	CCCTACTATGCCCTGTGAGGGGAAGGGCAG	MED12	31.92	695.0	0.637445887	0	AZD_200nM	0.6051069751117087
485	CCCTACTATGCCCTGTGAGGGGAAGGGCAG	MED12	31.92	695.0	0.571428571	0	PLX_2uM	0.6051069751117087
486	CAGGACTATGGAATGGGCCCGGGTCGGAGC	MED12	83.0	1807.0	0.331168831	0	AZD_200nM	0.5189940781462598
487	CAGGACTATGGAATGGGCCCGGGTCGGAGC	MED12	83.0	1807.0	0.378787879	0	PLX_2uM	0.5189940781462598
488	TTATACTATTGTCTGTCGGCCGGGAGGTTT	CD45	28.41	321.0	0.548736462	0	nodrug	0.631030811438622
489	AGGCACTCAAACTGCGGCTCAACCTGGTGA	MED12	70.65	1538.0	0.738095238	0	AZD_200nM	0.5951705145347408
490	AGGCACTCAAACTGCGGCTCAACCTGGTGA	MED12	70.65	1538.0	0.670995671	0	PLX_2uM	0.5951705145347408
491	TGCCACTCACACAGGACTATGGAATGGGCC	MED12	82.82	1803.0	0.61038961	0	AZD_200nM	0.5393413168072981
492	TGCCACTCACACAGGACTATGGAATGGGCC	MED12	82.82	1803.0	0.587662338	0	PLX_2uM	0.5393413168072981
493	AGAGACTCACCCAGCGTTCCCAGCAGGTAT	CD5	2.83	14.0	0.615062762	0	nodrug	0.5866371251678562
494	TGGCACTCACCTGCAGGTAGTGGCTGGTTC	MED12	84.84	1847.0	0.62012987	0	AZD_200nM	0.4535225551843571
495	TGGCACTCACCTGCAGGTAGTGGCTGGTTC	MED12	84.84	1847.0	0.822510823	1	PLX_2uM	0.4535225551843571
496	AGCCACTCACGCAACTAGCCAAAAAGGTAA	MED12	6.02	131.0	0.215367965	0	AZD_200nM	0.3875667635692026
497	AGCCACTCACGCAACTAGCCAAAAAGGTAA	MED12	6.02	131.0	0.305194805	0	PLX_2uM	0.3875667635692026
498	TGGAACTCAGTGACATTCCAGTTGGGGTCT	CD13	27.2	263.0	0.817582418	1	nodrug	0.6527396528865389
499	CTGCACTCAGTGACTTGCAATAGCCGGTCA	MED12	49.79	1084.0	0.837662338	1	AZD_200nM	0.629255500426035
500	CTGCACTCAGTGACTTGCAATAGCCGGTCA	MED12	49.79	1084.0	0.774891775	0	PLX_2uM	0.629255500426035
501	AGCCACTCCACGCACGTGCCCTCCAGGTAG	H2-K	49.32	182.0	0.514792899	0	nodrug	0.5322902044424271
502	AAGAACTCCCCAGTTCATGGTTACTGGTTC	CD33	16.21	59.0	0.6038961039999999	0	nodrug	0.3222077334266438
503	GAGAACTCCCTATAGCGATGGCTCTGGCCA	NF1	43.18	1226.0	0.7486413040000001	0	PLX_2uM	0.5982898998362283
504	CTATACTCCTTATGTTTCTCATGTGGGATT	MED12	89.57	1950.0	0.345238095	0	AZD_200nM	0.38598251197448163
505	CTATACTCCTTATGTTTCTCATGTGGGATT	MED12	89.57	1950.0	0.46428571399999996	0	PLX_2uM	0.38598251197448163
506	TCAAACTCCTTGCATGACATGAACTGGTAC	TADA2B	63.1	265.0	0.010526316	0	AZD_200nM	0.47479408414289886
507	TCGAACTCGCTGTCCATCTCATACTGGCTG	CD13	18.2	176.0	0.356043956	0	nodrug	0.532449904169311
508	TTGAACTCGGCATTCGAGCGAAACTGGGGC	CD28	36.24	79.0	0.135135135	0	nodrug	0.27509777010011216
509	TAAGACTCTTGCCTAGCCCCGTGTAGGTGA	MED12	47.63	1037.0	0.811688312	1	AZD_200nM	0.6873314711282803
510	TAAGACTCTTGCCTAGCCCCGTGTAGGTGA	MED12	47.63	1037.0	0.8311688309999999	1	PLX_2uM	0.6873314711282803
511	AGACACTGAAACTTTACGTAAATGTGGGTG	NF1	91.33	2593.0	0.29076087	0	PLX_2uM	0.3490902392183468
512	ACCAACTGAGCCAACATGTGACCGTGGACG	CD15	72.08	382.0	0.963369963	1	nodrug	0.7220038703906978
513	TCAGACTGAGTCTCAAAACTTGCTTGGTCT	NF1	75.63	2147.0	0.059782609	0	PLX_2uM	0.4664253277823545
514	ACTGACTGATAGCAGAATTAAGACCGGCTC	MED12	17.87	389.0	0.71969697	0	AZD_200nM	0.6644273913244809
515	ACTGACTGATAGCAGAATTAAGACCGGCTC	MED12	17.87	389.0	0.676406926	0	PLX_2uM	0.6644273913244809
516	TCCTACTGCACCGATGCTGTTCTGAGGGAA	NF1	49.31	1400.0	0.820652174	1	PLX_2uM	0.6394450119114709
517	CCACACTGCAGAGACTTACAGATGAGGTTC	CD5	40.49	200.0	0.815899582	1	nodrug	0.6932374193369631
518	TCCCACTGCCCTTATCAGGTCTCCCGGAAT	MED12	39.0	849.0	0.846320346	1	AZD_200nM	0.5655624094705088
519	TCCCACTGCCCTTATCAGGTCTCCCGGAAT	MED12	39.0	849.0	0.883116883	1	PLX_2uM	0.5655624094705088
520	ATCGACTGCTGGACAATGAGGATGGGGAAA	MED12	61.32	1335.0	0.507575758	0	AZD_200nM	0.5968651057496605
521	ATCGACTGCTGGACAATGAGGATGGGGAAA	MED12	61.32	1335.0	0.534632035	0	PLX_2uM	0.5968651057496605
522	AGATACTGCTGTAGCTTTGGCTTCTGGAAA	NF1	71.82	2039.0	0.13451087	0	PLX_2uM	0.21554420739074653
523	ATACACTGGAAAAATGTCTTGCTGGGGTAA	NF1	3.35	95.0	0.801630435	1	PLX_2uM	0.6755188750389846
524	CCACACTGGAACTCTCCACAGAACTGGTTG	CD43	53.42	211.0	0.442028986	0	nodrug	0.5037433107383693
525	AGGTACTGGATCATGATGTTTCAAAGGAAG	NF2	14.62	87.0	0.955156951	1	PLX_2uM	0.6243285618769422
526	CATGACTGGCTTCCTTTGTGCCCTTGGGGG	NF1	29.8	846.0	0.03125	0	PLX_2uM	0.269618915215415
527	AGCCACTGGGACGAGCGCCAGGCCCGGGTC	CD15	69.62	369.0	0.509157509	0	nodrug	0.4062038063482209
528	AGATACTGGGCTAACCTAAAGCTGTGGTTC	TADA1	9.55	32.0	0.917431193	1	AZD_200nM	0.7178624595786972
529	GAGAACTGGGGACTGGTGACCTACCGGGAG	CD13	37.44	362.0	0.43956044	0	nodrug	0.5162090170698281
530	TTCCACTGGGGCAGCGGGATGACACGGCGC	CCDC101	71.67	210.0	0.7449664429999999	0	AZD_200nM	0.5420960625168542
531	TCGCACTGTCAGTGGTGTACTCCCAGGAGA	CD13	3.52	34.0	0.843956044	1	nodrug	0.6655728196170334
532	CGCCACTGTCCAGGAAACAGGGGCTGGTGG	CD15	66.98	355.0	0.868131868	1	nodrug	0.5530637049808119
533	GCAGACTGTTCCTGGCTGAATTTCAGGTAT	CD45	42.74	483.0	0.180505415	0	nodrug	0.19718415990241206
534	ACTTACTGTTCTGGTTCACTCCTGTGGGGC	CD5	85.22	421.0	0.21757322199999998	0	nodrug	0.4151420909903758
535	TCTGACTGTTCTTGCAACAATAGCAGGTGA	NF1	84.71	2405.0	0.18614130399999998	0	PLX_2uM	0.4857107762715668
536	TCTTACTGTTTCACGTTGTCCCCCAGGGCC	TADA1	5.97	20.0	0.80733945	1	AZD_200nM	0.5021972528993512
537	AGAGACTTACAGATGAGGTTCCCCAGGCCC	CD5	39.88	197.0	0.878661088	1	nodrug	0.6181836871047122
538	CAGCACTTACAGGTGACGTTGAGCTGGATG	CD33	62.91	229.0	0.543290043	0	nodrug	0.5428164640497144
539	AAGTACTTACTGATCCGAAGATCCAGGCGC	NF1	92.11	2615.0	0.41576087	0	PLX_2uM	0.3395889314050448
540	TGGAACTTACTTTAATAGAAACTTTGGTGT	NF1	61.75	1753.0	0.403532609	0	PLX_2uM	0.43849654819490685
541	AGATACTTATAGCTTCTTGTCTCCAGGTCT	NF1	17.08	485.0	0.974184783	1	PLX_2uM	0.5347766406692409
542	AAGGACTTATTGAGAGAGAATATTTGGCAC	CUL3	98.05	753.0	0.16883116899999998	0	PLX_2uM	0.10721962480396696
543	GGGTACTTCATACTTTGGAAGTGCTGGACA	MED12	21.22	462.0	0.467532468	0	AZD_200nM	0.5026878103235484
544	GGGTACTTCATACTTTGGAAGTGCTGGACA	MED12	21.22	462.0	0.607142857	0	PLX_2uM	0.5026878103235484
545	CTGAACTTCGGAATTCTGCCTCTGGGGTTT	NF1	4.9	139.0	0.9103260870000001	1	PLX_2uM	0.6165433109163212
546	CAGAACTTGACTGTTGTAAGTGTCAGGTCC	NF1	80.45	2284.0	0.39130434799999997	0	PLX_2uM	0.4543491976925942
547	GTATACTTGCACTCTCATCTCCCGAGGGGA	MED12	28.48	620.0	0.9329004329999999	1	AZD_200nM	0.6662841907846236
548	GTATACTTGCACTCTCATCTCCCGAGGGGA	MED12	28.48	620.0	0.891774892	1	PLX_2uM	0.6662841907846236
549	AGGTACTTGGAGCTGTGATATGTGGGGTAG	CD43	8.35	33.0	0.7826086959999999	0	nodrug	0.7600831415682819
550	TAACACTTGGTTCACTGACTTGGCTGGCAC	MED12	5.51	120.0	0.472943723	0	AZD_200nM	0.5239116912231668
551	TAACACTTGGTTCACTGACTTGGCTGGCAC	MED12	5.51	120.0	0.457792208	0	PLX_2uM	0.5239116912231668
552	CTGCACTTTCCAAGAGATTGAACAAGGCAC	CD45	89.2	1008.0	0.924187726	1	nodrug	0.5598786854855194
553	TCAAACTTTGAACTGGTAAGGTTAAGGCTG	NF1	55.05	1563.0	0.555706522	0	PLX_2uM	0.48104094452287605
554	GTGCAGAAAAGCTATTTGACTTGGTGGATG	NF1	8.88	252.0	0.7160326090000001	0	PLX_2uM	0.5569975719570149
555	TCACAGAAAGCGGCTGGATCTCCAGGGACG	TADA2B	99.05	416.0	0.23157894699999998	0	AZD_200nM	0.31212272490395204
556	GAGCAGAAAGGGAGCCAGAGGCGATGGAAC	MED12	25.45	554.0	0.443722944	0	AZD_200nM	0.5073876822779798
557	GAGCAGAAAGGGAGCCAGAGGCGATGGAAC	MED12	25.45	554.0	0.529220779	0	PLX_2uM	0.5073876822779798
558	ACTAAGAAAGTAACAACGTGGAAGAGGTAG	NF1	74.11	2104.0	0.97826087	1	PLX_2uM	0.5479022976996916
559	CATGAGAAAGTGGGACTTCAAATACGGACC	NF1	32.16	913.0	0.3125	0	PLX_2uM	0.5559766445901502
560	CCTCAGAAATCACCAGTGCTTCGTTGGCCA	NF2	62.52	372.0	0.596412556	0	PLX_2uM	0.5482999117924319
561	AACCAGAAATGATGATTGCTGCTCAGGGGC	CD45	76.19	861.0	0.314079422	0	nodrug	0.3805168695360439
562	GCACAGAAATTCTCAAGTGGTTGCGGGAAA	NF1	21.13	600.0	0.339673913	0	PLX_2uM	0.4293981999696106
563	AGAGAGAAATTGACATTCACCTGGTGGTAC	CD45	10.0	113.0	0.592057762	0	nodrug	0.7084276289224746
564	AGCCAGAAATTTGGATCCATAGCCAGGGCC	CD33	4.4	16.0	0.015151515	0	nodrug	0.3997502560613228
565	CTGTAGAACAAGTGCGCAGAATACTGGCCA	CD45	52.3	591.0	0.422382671	0	nodrug	0.47597134676058594
566	TAAGAGAACACTTTACCTGTCCTTGGGAGT	NF1	33.43	949.0	0.638586957	0	PLX_2uM	0.540986793950432
567	GGTTAGAACCATCAGAGAGCCTTGAGGAAA	NF1	46.92	1332.0	0.894021739	1	PLX_2uM	0.7632527678880929
568	AAGAAGAACTTAAGCGAGGCCCTGGGGGAC	TADA1	5.67	19.0	0.935779817	1	AZD_200nM	0.6390994153187355
569	GAACAGAAGAACTTCCAGAGGAGGAGGGAG	MED12	57.51	1252.0	0.514069264	0	AZD_200nM	0.5202848543102698
570	GAACAGAAGAACTTCCAGAGGAGGAGGGAG	MED12	57.51	1252.0	0.53030303	0	PLX_2uM	0.5202848543102698
571	TTACAGAAGATGGCTGAATACTACCGGCCA	MED12	9.42	205.0	0.577922078	0	AZD_200nM	0.6258895562285625
572	TTACAGAAGATGGCTGAATACTACCGGCCA	MED12	9.42	205.0	0.595238095	0	PLX_2uM	0.6258895562285625
573	AAGGAGAAGATTGAAGGGACCCTTGGGGTT	MED12	33.16	722.0	0.622294372	0	AZD_200nM	0.4205442444525362
574	AAGGAGAAGATTGAAGGGACCCTTGGGGTT	MED12	33.16	722.0	0.575757576	0	PLX_2uM	0.4205442444525362
575	AGTAAGAAGCAGCGCCTGGATCTTCGGATC	NF1	92.11	2615.0	0.585597826	0	PLX_2uM	0.27288647979536856
576	TACAAGAAGCTGGTGAAGAAATGTAGGTAC	CD5	82.59	408.0	0.765690377	0	nodrug	0.5409172532261283
577	TCACAGAAGCTTTGTTGGAGATCATGGAGG	NF1	77.91	2212.0	0.130434783	0	PLX_2uM	0.32633176353159404
578	GATAAGAAGGGCTGCTGGCTCAATAGGGAC	MED12	67.8	1476.0	0.042207792	0	AZD_200nM	0.2672868315560423
579	GATAAGAAGGGCTGCTGGCTCAATAGGGAC	MED12	67.8	1476.0	0.09199134199999999	0	PLX_2uM	0.2672868315560423
580	ATCAAGAAGTACAGGAGGAGACTCAGGGCA	CD33	23.63	86.0	0.612554113	0	nodrug	0.5075116463111974
581	GCGCAGAATACTGGCCAAGCATGGAGGAAG	CD45	52.65	595.0	0.9061371840000001	1	nodrug	0.7216399259556077
582	GCCAAGAATCAAGTGGCATGTTACTGGTGC	CD43	63.29	250.0	0.268115942	0	nodrug	0.41908403249560033
583	GCGGAGAATCCGAGATATGAGCCGCGGGCG	H2-K	18.43	68.0	0.875739645	1	nodrug	0.6794619713927196
584	GTGCAGAATGGCTAGGAGTGCTTAAGGCCT	MED12	50.34	1096.0	0.9058441559999999	1	AZD_200nM	0.6187933707621068
585	GTGCAGAATGGCTAGGAGTGCTTAAGGCCT	MED12	50.34	1096.0	0.94047619	1	PLX_2uM	0.6187933707621068
586	AAGAAGACAATTCAGTAGTTTCCAAGGGGG	CD43	19.75	78.0	0.826086957	1	nodrug	0.6079657354895138
587	GGGGAGACACTCACGGGTTATTATTGGGGT	CD13	81.18	785.0	0.032967033	0	nodrug	0.2046957297007308
588	GATGAGACAGTTGATGACTTCTGGAGGATG	CD45	49.82	563.0	0.989169675	1	nodrug	0.7242266381943905
589	GAAGAGACATGTTGACCCTTTCATGGGTGA	MED12	8.41	183.0	0.851731602	1	AZD_200nM	0.5879332047386917
590	GAAGAGACATGTTGACCCTTTCATGGGTGA	MED12	8.41	183.0	0.853896104	1	PLX_2uM	0.5879332047386917
591	GCCAAGACCCAAACCCAGCGGGCCTGGCCC	CD5	75.51	373.0	0.062761506	0	nodrug	0.321362066574392
592	CGATAGACCGCGGGGTTGCGGTCGAGGAAA	CD15	89.81	476.0	0.054945055	0	nodrug	0.3636035349198148
593	ACGAAGACCTGAAAACGTGGACGGCGGCGG	H2-K	42.01	155.0	0.355029586	0	nodrug	0.7052477673489355
594	CCAAAGACCTGGTGTCTATGATTCAGGACC	CD45	85.58	967.0	0.19133574	0	nodrug	0.3177153612039501
595	TCAAAGACCTGTGCCATCTGGTCCTGGTTG	MED12	43.27	942.0	0.522727273	0	AZD_200nM	0.5122899741942928
596	TCAAAGACCTGTGCCATCTGGTCCTGGTTG	MED12	43.27	942.0	0.487012987	0	PLX_2uM	0.5122899741942928
597	ACACAGACGGTCCATGGCAGCCCCCGGCCT	CD15	27.92	148.0	0.435897436	0	nodrug	0.5967951224991908
598	CAGTAGACGGTGGACCGCAGGTTGGGGTGG	CD13	81.8	791.0	0.44285714299999995	0	nodrug	0.4475330398007965
599	AGAGAGACTCAGGGCCTACCTGGAGGGCAC	H2-K	49.05	181.0	0.704142012	0	nodrug	0.6737584651196868
600	ACGGAGACTGGCCCTGCAGCTGGATGGTGT	MED12	14.19	309.0	0.882034632	1	AZD_200nM	0.6537347122620026
601	ACGGAGACTGGCCCTGCAGCTGGATGGTGT	MED12	14.19	309.0	0.937229437	1	PLX_2uM	0.6537347122620026
602	TGCCAGACTTCAACGCCGGCGCCATGGAGA	CD13	36.5	353.0	0.605494505	0	nodrug	0.5546737522073658
603	TCATAGACTTCTCACACAGGATAATGGTAA	TADA1	16.12	54.0	0.7064220179999999	0	AZD_200nM	0.441472754497852
604	ATGCAGACTTTGCTTTCCTTGGTCAGGCAG	HPRT1	68.81	150.0	0.53125	0	6TG_2ug/mL	0.39334432813846154
605	GAGGAGAGACTCACCGGAAAGGCCCGGATC	CUL3	2.6	20.0	0.636363636	0	PLX_2uM	0.5109215355494083
606	TTGAAGAGAGACAGTACATGCCCTGGGAGG	CD13	71.77	694.0	0.946153846	1	nodrug	0.6358253705390626
607	AAGCAGAGAGACTCAGGGCCTACCTGGAGG	H2-K	48.78	180.0	0.828402367	1	nodrug	0.5418126833223745
608	TGACAGAGATGGATCCCAGCAGACAGGGTT	CD45	88.5	1000.0	0.7364620940000001	0	nodrug	0.5121376028246657
609	TGCCAGAGATTGCTCAGGAAGCAATGGAGG	NF1	19.2	545.0	0.888586957	1	PLX_2uM	0.607293863055369
610	GTTAAGAGCATAGACAGTATGTGTAGGGAT	TADA1	87.76	294.0	0.816513761	1	AZD_200nM	0.5573816031753548
611	TTAAAGAGCATTAATATGGTCATCTGGAAA	CUL3	77.99	599.0	0.5324675320000001	0	PLX_2uM	0.4584024943315294
612	TCAGAGAGCCTTGAGGAAAACCAGCGGAAC	NF1	47.06	1336.0	0.961956522	1	PLX_2uM	0.7599819042010141
613	CTCTAGAGCGCTCTGGTGTATGGCTGGTGG	MED12	65.5	1426.0	0.7326839829999999	0	AZD_200nM	0.577943960681523
614	CTCTAGAGCGCTCTGGTGTATGGCTGGTGG	MED12	65.5	1426.0	0.70021645	0	PLX_2uM	0.577943960681523
615	AACAAGAGCTCTTGGTTGCAGGGATGGATT	NF1	79.04	2244.0	0.36005434799999997	0	PLX_2uM	0.42038724117427095
616	CTAGAGAGCTGTTGTTGAAGTTGCCGGACC	MED12	99.08	2157.0	0.082251082	0	AZD_200nM	0.10711250771862857
617	CTAGAGAGCTGTTGTTGAAGTTGCCGGACC	MED12	99.08	2157.0	0.14177489199999999	0	PLX_2uM	0.10711250771862857
618	CGTTAGAGCTTGTTGTCACAGTGGTGGGGG	CD43	40.76	161.0	0.347826087	0	nodrug	0.5861035518371583
619	TCATAGAGGAACTGGTATTGCTCCTGGTGA	CD45	92.12	1041.0	0.707581227	0	nodrug	0.4563142106601447
620	CCCAAGAGGAATTGCTTCCAAAAAGGGTAA	NF2	28.74	171.0	0.215246637	0	PLX_2uM	0.5084282240785446
621	CGCCAGAGGCAAAAGCGGAGGACTGGGGCC	CD43	70.63	279.0	0.7463768120000001	0	nodrug	0.4525486218163258
622	CCAAAGAGGCAGATCAGCTGAAGCAGGACC	NF2	76.47	455.0	0.376681614	0	PLX_2uM	0.48854592836023575
623	GTGTAGAGGCCACGCAGCTTTGTCCGGTAA	CCDC101	19.45	57.0	0.637583893	0	AZD_200nM	0.581105964850032
624	AGGGAGAGGGAGGCCGGGGACCAGGGGCTC	MED12	28.94	630.0	0.27380952399999997	0	AZD_200nM	0.45027209642169647
625	AGGGAGAGGGAGGCCGGGGACCAGGGGCTC	MED12	28.94	630.0	0.345238095	0	PLX_2uM	0.45027209642169647
626	CTCCAGAGGGGAGGGGTCACTGGGTGGATC	CD45	67.7	765.0	0.296028881	0	nodrug	0.49431239502688074
627	ATGTAGAGGTGGCAATCCGGCAGTGGGATT	MED12	10.66	232.0	0.726190476	0	AZD_200nM	0.6853606644910734
628	ATGTAGAGGTGGCAATCCGGCAGTGGGATT	MED12	10.66	232.0	0.664502165	0	PLX_2uM	0.6853606644910734
629	CTCTAGAGTGTCGATCATGAACTCAGGTGC	MED12	46.9	1021.0	0.647186147	0	AZD_200nM	0.6366789952378156
630	CTCTAGAGTGTCGATCATGAACTCAGGTGC	MED12	46.9	1021.0	0.643939394	0	PLX_2uM	0.6366789952378156
631	TGACAGAGTTAGTGAATGGAGACCAGGTTT	CD45	79.12	894.0	0.6895306859999999	0	nodrug	0.5826642480517696
632	GAGCAGAGTTTCCGAGTGGACCTGAGGACC	H2-K	26.83	99.0	0.710059172	0	nodrug	0.6538654459402696
633	CATGAGATAGAAGCTGCTATAGTGCGGATA	CUL3	92.19	708.0	0.7857142859999999	0	PLX_2uM	0.5571031781677506
634	ACTCAGATCATCACCAAGTACTTATGGGAG	MED12	8.91	194.0	0.235930736	0	AZD_200nM	0.2916166779707911
635	ACTCAGATCATCACCAAGTACTTATGGGAG	MED12	8.91	194.0	0.24783549800000002	0	PLX_2uM	0.2916166779707911
636	GTGGAGATCCAGATGGAAAACAAGTGGAAA	CD5	10.93	54.0	0.807531381	1	nodrug	0.7080825955059099
637	CTGGAGATCCAGCCGCTTTCTGTGAGGAAA	TADA2B	97.62	410.0	0.931578947	1	AZD_200nM	0.488715681354712
638	AAAAAGATCGTACATGTTCACCGGAGGCAA	TADA1	82.09	275.0	0.7247706420000001	0	AZD_200nM	0.6515511821935571
639	CCAGAGATCTGTACCTGGTGCACCTGGCTG	MED12	69.22	1507.0	0.18939393899999998	0	AZD_200nM	0.4755693161538872
640	CCAGAGATCTGTACCTGGTGCACCTGGCTG	MED12	69.22	1507.0	0.221861472	0	PLX_2uM	0.4755693161538872
641	TTACAGATGAGGTTCCCCAGGCCCAGGGGC	CD5	39.47	195.0	0.372384937	0	nodrug	0.4759634863696512
642	TTACAGATGATGAAAAGCAGCTGATGGATG	CD45	40.09	453.0	0.42599278	0	nodrug	0.6017902460490654
643	ACACAGATGCAGGCTGCAGATGCCCGGAAG	CD13	22.44	217.0	0.315384615	0	nodrug	0.5367359624115754
644	GCAAAGATGCAGGTAGAGTGTCTCCGGAGC	TADA1	79.4	266.0	0.201834862	0	AZD_200nM	0.4951334895656387
645	TATGAGATGGACAGCGAGTTCGAGGGGGAG	CD13	18.92	183.0	0.453846154	0	nodrug	0.6055492511911513
646	GACCAGATGGCACAGGTCTTTGAGGGGTAA	MED12	43.59	949.0	0.993506494	1	AZD_200nM	0.7437718960647818
647	GACCAGATGGCACAGGTCTTTGAGGGGTAA	MED12	43.59	949.0	0.9859307359999999	1	PLX_2uM	0.7437718960647818
648	CTGAAGATGGCTGAGGAGTCAGAGAGGAGG	NF2	74.79	445.0	0.48878923799999996	0	PLX_2uM	0.6297343090177756
649	ACAGAGATGTCCAGCGGGGGCAGCGGGGTG	TADA2B	35.95	151.0	0.32631578899999997	0	AZD_200nM	0.33956074695176247
650	GGTAAGATGTTTGGTATTGTGGTGGGGATT	NF1	94.96	2696.0	0.18070652199999998	0	PLX_2uM	0.3833065165329386
651	CAGAAGATTATAGGCAGCTGACCTAGGAGA	NF1	65.9	1871.0	0.732336957	0	PLX_2uM	0.603987247276124
652	CCACAGATTCTCCAGCTATGTATCGGGAAC	NF2	50.59	301.0	0.869955157	1	PLX_2uM	0.5883621446032402
653	TCAGAGATTTGGACCAGGCAAGCATGGAAG	NF1	37.76	1072.0	0.559782609	0	PLX_2uM	0.5455354124997214
654	CCGCAGCAAAACCTGGAAAACCCAAGGGAA	TADA1	28.66	96.0	0.642201835	0	AZD_200nM	0.5485001201893008
655	TCAAAGCAAAAGTCTCTCTCTCATAGGAGC	NF1	77.25	2193.0	0.524456522	0	PLX_2uM	0.4251612073731052
656	ACTTAGCAAAGATATCTTCAGCAGTGGGGA	MED12	37.94	826.0	0.279220779	0	AZD_200nM	0.5430561196750195
657	ACTTAGCAAAGATATCTTCAGCAGTGGGGA	MED12	37.94	826.0	0.316017316	0	PLX_2uM	0.5430561196750195
658	GGCCAGCAAGTACGTGGACATCTTGGGCGT	CD13	28.44	275.0	0.364835165	0	nodrug	0.4767249672991095
659	GTAAAGCAAGTACTTACATCAATTGGGAAG	NF1	11.8	335.0	0.40625	0	PLX_2uM	0.49452313359134714
660	GTGGAGCACACCCAGCAATACGAATGGCAC	NF1	16.24	461.0	0.46875	0	PLX_2uM	0.7117249235057395
661	TACCAGCACATAGTGAAATGTAGAAGGTGA	NF1	14.27	405.0	0.957880435	1	PLX_2uM	0.5420625153355191
662	AGTCAGCACCCAGGTACTCCACGTAGGAGG	CD13	43.12	417.0	0.9043956040000001	1	nodrug	0.7967689979848542
663	CAGCAGCACGCCCACCGGTCGCGACGGGGT	CD15	35.28	187.0	0.47619047600000003	0	nodrug	0.4994467617903585
664	GAGCAGCACTTCAGAAAAGAGTGATGGCAC	NF1	26.73	759.0	0.869565217	1	PLX_2uM	0.6537107199730807
665	GAGTAGCAGAAACTGATTATGAAATGGGTG	NF1	90.81	2578.0	0.08423913	0	PLX_2uM	0.20633353714664368
666	AGGAAGCAGATATCCGGTGTGGGGTGGATG	NF1	25.43	722.0	0.654891304	0	PLX_2uM	0.626972957126174
667	GTTCAGCAGATGAAAGCCCAGGCCAGGGAG	NF2	54.62	325.0	0.941704036	1	PLX_2uM	0.45367597850959523
668	CCAGAGCAGATGACGGTGAGCGCCTGGCCG	CD5	53.04	262.0	0.259414226	0	nodrug	0.43442479392210026
669	CAGCAGCAGCAGCAGCAGATCCTGCGGGTA	MED12	95.91	2088.0	0.046536797000000005	0	AZD_200nM	0.18153102766874865
670	CAGCAGCAGCAGCAGCAGATCCTGCGGGTA	MED12	95.91	2088.0	0.064935065	0	PLX_2uM	0.18153102766874865
671	CAGCAGCAGCAGCAGTACCACATCCGGCAG	MED12	95.5	2079.0	0.06385281400000001	0	AZD_200nM	0.1378754766394972
672	CAGCAGCAGCAGCAGTACCACATCCGGCAG	MED12	95.5	2079.0	0.103896104	0	PLX_2uM	0.1378754766394972
673	ATGGAGCAGGAGGGGCCCGAGTATTGGGAG	H2-K	21.68	80.0	0.7928994079999999	0	nodrug	0.3812112778929845
674	TAGAAGCAGGTAGTCTGGGGATACAGGGCC	CCDC101	81.23	238.0	0.7852348990000001	0	AZD_200nM	0.3614381939374029
675	GAATAGCAGTAACTCTTTGTCGTTTGGCAT	NF1	69.32	1968.0	0.286684783	0	PLX_2uM	0.35730499250202086
676	ATCGAGCAGTTCGGCTTCGGAAACTGGGTG	TADA2B	21.19	89.0	0.27894736800000003	0	AZD_200nM	0.23750003122546642
677	TGTAAGCATACCTGGTATAAACAGTGGCAC	NF1	48.15	1367.0	0.695652174	0	PLX_2uM	0.7639251761141083
678	CACCAGCATTAAGGAGTGAAGGGATGGCAG	MED12	52.96	1153.0	0.992424242	1	AZD_200nM	0.6784987704254429
679	CACCAGCATTAAGGAGTGAAGGGATGGCAG	MED12	52.96	1153.0	0.965367965	1	PLX_2uM	0.6784987704254429
680	CTTCAGCATTCTCAGGATAAAATTTGGCCA	NF2	16.81	100.0	0.01793722	0	PLX_2uM	0.26827704382432865
681	CAAAAGCCAAAATGGAAGATGGCCAGGTAA	NF1	28.25	802.0	0.885869565	1	PLX_2uM	0.5153465768645958
682	GCTCAGCCACAGAGATGTCCAGCGGGGGCA	TADA2B	36.67	154.0	0.957894737	1	AZD_200nM	0.7173923497754522
683	GCACAGCCACAGCTACCCAAAAGAGGGCTT	NF1	81.58	2316.0	0.574728261	0	PLX_2uM	0.5799734092664787
684	CCTCAGCCACCACCAACCCCGCCTCGGCCA	CD13	6.2	60.0	0.096703297	0	nodrug	0.5568994027686827
685	AAAAAGCCACCACCTAGAATCGAAAGGGGC	NF1	50.58	1436.0	0.923913043	1	PLX_2uM	0.6294067360446168
686	GGGCAGCCACCTTGTCTCCAGGTCTGGCCA	CCDC101	53.92	158.0	0.42281879200000005	0	AZD_200nM	0.3811501626207228
687	ACATAGCCACTGGGCCGCTGTTGCAGGTGG	MED12	91.5	1992.0	0.12770562800000002	0	AZD_200nM	0.1383935072814286
688	ACATAGCCACTGGGCCGCTGTTGCAGGTGG	MED12	91.5	1992.0	0.012987013	0	PLX_2uM	0.1383935072814286
689	AGGCAGCCAGCAGGTGGCGGTCGCAGGAGG	MED12	55.31	1204.0	0.26082251100000003	0	AZD_200nM	0.45679845111548545
690	AGGCAGCCAGCAGGTGGCGGTCGCAGGAGG	MED12	55.31	1204.0	0.226190476	0	PLX_2uM	0.45679845111548545
691	CCCGAGCCAGGAAATCCATGAGCCTGGACA	NF1	88.87	2523.0	0.39945652200000004	0	PLX_2uM	0.37675704492276113
692	AATGAGCCAGGCAGCCCGCATCACAGGCAC	MED12	7.07	154.0	0.9686147190000001	1	AZD_200nM	0.5640578318188273
693	AATGAGCCAGGCAGCCCGCATCACAGGCAC	MED12	7.07	154.0	0.99025974	1	PLX_2uM	0.5640578318188273
694	CTGCAGCCAGGGGCCGGGGACGGTGGGAAG	CD5	62.96	311.0	0.79916318	0	nodrug	0.5088160732603096
695	CGAAAGCCAGGTAGAACTTGTAGCGGGCCA	CD15	76.79	407.0	0.333333333	0	nodrug	0.562596855256616
696	CTGTAGCCATTTAAAGAACAAATTTGGGGA	MED12	45.38	988.0	0.021645022000000003	0	AZD_200nM	0.17469666125821603
697	CTGTAGCCATTTAAAGAACAAATTTGGGGA	MED12	45.38	988.0	0.037878788	0	PLX_2uM	0.17469666125821603
698	GACAAGCCCAGACCAAACTAGAAGTGGCCC	NF1	24.23	688.0	0.46195652200000004	0	PLX_2uM	0.6181083997303642
699	CAGGAGCCCAGCAATTTGTGGCAAAGGATC	TADA1	37.91	127.0	0.24770642199999998	0	AZD_200nM	0.48805543781163263
700	TGAAAGCCCAGGCCAGGGAGGAGAAGGCTA	NF2	55.13	328.0	0.367713004	0	PLX_2uM	0.5219837321738531
701	TAGAAGCCCAGGGCCCAGCACCTCAGGGTG	H2-K	60.43	223.0	0.218934911	0	nodrug	0.35028472010845885
702	GGGAAGCCCATCTGCAGGGTCCAGCGGTTC	CD13	56.15	543.0	0.906593407	1	nodrug	0.5943680071072928
703	TTATAGCCCCCCTTGAGCACACAGAGGGCT	HPRT1	30.28	66.0	0.828125	1	6TG_2ug/mL	0.7433749142037764
704	GAGCAGCCCCCGGTTTGTCAGTTTTGGGGG	MED12	81.26	1769.0	0.04978355	0	AZD_200nM	0.12916911358049246
705	GAGCAGCCCCCGGTTTGTCAGTTTTGGGGG	MED12	81.26	1769.0	0.095238095	0	PLX_2uM	0.12916911358049246
706	CACCAGCCCCTGTTTCCTGGACAGTGGCGG	CD15	66.23	351.0	0.923076923	1	nodrug	0.6494957627020873
707	TTGTAGCCCTCTGTGTGCTCAAGGGGGGCT	HPRT1	31.65	69.0	0.8125	1	6TG_2ug/mL	0.6220820463352632
708	AGGGAGCCCTTGAGGTGCACCACCAGGTAC	CD13	16.86	163.0	0.52967033	0	nodrug	0.5934264416723093
709	ACCTAGCCGGCTCCAAACGGGGAAAGGAGG	TADA2B	78.57	330.0	0.115789474	0	AZD_200nM	0.45838698667384586
710	CAATAGCCGGTCAGCTCTGCACACAGGATT	MED12	49.52	1078.0	0.96969697	1	AZD_200nM	0.6960548613175304
711	CAATAGCCGGTCAGCTCTGCACACAGGATT	MED12	49.52	1078.0	0.962121212	1	PLX_2uM	0.6960548613175304
712	TTGAAGCCGTCAGCACCACTCTCTTGGGGC	MED12	78.14	1701.0	0.346320346	0	AZD_200nM	0.32900312736628085
713	TTGAAGCCGTCAGCACCACTCTCTTGGGGC	MED12	78.14	1701.0	0.363636364	0	PLX_2uM	0.32900312736628085
714	TCGCAGCCGTCGTAGGCGTACTGCTGGTAC	H2-K	36.86	136.0	0.50887574	0	nodrug	0.516007479636129
715	TGGTAGCCGTGGTAGCGGCGGTGGTGGCCG	TADA2B	10.71	45.0	0.336842105	0	AZD_200nM	0.4700098695179987
716	ATGGAGCCGTGTTTGCTGTTCTCAAGGCTG	MED12	56.22	1224.0	0.980519481	1	AZD_200nM	0.5792809435048902
717	ATGGAGCCGTGTTTGCTGTTCTCAAGGCTG	MED12	56.22	1224.0	0.9664502159999999	1	PLX_2uM	0.5792809435048902
718	ACTCAGCCTCTGCATCGGCCTTGGCGGTTG	CCDC101	22.87	67.0	0.8456375840000001	1	AZD_200nM	0.510896567928305
719	CACCAGCCTGCTCCCACTTGTGTTTGGTGA	H2-K	44.99	166.0	0.8994082840000001	1	nodrug	0.38414853575939895
720	TCCAAGCCTTACTCGGAGAAGCAGAGGCAG	MED12	12.86	280.0	0.730519481	0	AZD_200nM	0.6338897749892306
721	TCCAAGCCTTACTCGGAGAAGCAGAGGCAG	MED12	12.86	280.0	0.754329004	0	PLX_2uM	0.6338897749892306
722	TTCTAGCCTTCTCCTCCCTGGCCTGGGCTT	NF2	54.62	325.0	0.802690583	1	PLX_2uM	0.41607572645910806
723	ACACAGCCTTGAGAACAGCAAACACGGCTC	MED12	56.09	1221.0	0.975108225	1	AZD_200nM	0.6691425411560156
724	ACACAGCCTTGAGAACAGCAAACACGGCTC	MED12	56.09	1221.0	0.9480519479999999	1	PLX_2uM	0.6691425411560156
725	GAACAGCGACGTGGAAGTCTGTGTCGGGAA	CD28	30.73	67.0	0.540540541	0	nodrug	0.5821685211558474
726	CTATAGCGATGGCTCTGGCCAATGTGGTTC	NF1	43.29	1229.0	0.698369565	0	PLX_2uM	0.6447032787442583
727	TTAAAGCGATTGCTAGGCCCGGTATGGGTA	NF1	58.05	1648.0	0.229619565	0	PLX_2uM	0.48058929639674447
728	GTGAAGCGCCCGCCGTCCACCAGCTGGTAG	TADA2B	12.62	53.0	0.43157894700000005	0	AZD_200nM	0.5559720532582934
729	ACCCAGCGCTGGCCCGGGGGCCTGGGGCTG	CD15	53.96	286.0	0.575091575	0	nodrug	0.4546143902145976
730	CGCCAGCGCTTGGCAGCCAAGGAGGGGCTT	TADA1	98.51	330.0	0.128440367	0	AZD_200nM	0.2699210349530914
731	AGGCAGCGGAGCACTCACCTGGCCAGGTTG	CD13	69.18	669.0	0.048351648	0	nodrug	0.44292432486482924
732	AGGCAGCGGCGGCGGCAGAAGCCCTGGCGA	CD15	52.64	279.0	0.43956044	0	nodrug	0.4460145081512959
733	GAGGAGCGGGCTGCACCTTGCTGTAGGAGA	CD13	49.43	478.0	0.6087912089999999	0	nodrug	0.6329857965108676
734	AACCAGCGGTTGGTCGTACTGTTTGGGGTG	MED12	34.82	758.0	0.21969697	0	AZD_200nM	0.2716746018486799
735	AACCAGCGGTTGGTCGTACTGTTTGGGGTG	MED12	34.82	758.0	0.214285714	0	PLX_2uM	0.2716746018486799
736	TCTCAGCGTCACCCGGTAGGAATCGGGTTT	CD13	8.69	84.0	0.46263736299999997	0	nodrug	0.514938951347919
737	CATCAGCGTCGCTCTCCTGCTCTCAGGTAC	THY1	6.79	11.0	0.129032258	0	nodrug	0.5177163814260561
738	ATAAAGCTACAGTAAAAGAAAAAAAGGAAA	NF1	48.78	1385.0	0.09782608699999999	0	PLX_2uM	0.29652599394274665
739	CAGCAGCTACCTGGGGCTGGGACTGGGGCT	MED12	97.98	2133.0	0.004329004	0	AZD_200nM	0.03693925699235429
740	CAGCAGCTACCTGGGGCTGGGACTGGGGCT	MED12	97.98	2133.0	0.019480518999999998	0	PLX_2uM	0.03693925699235429
741	CTGCAGCTCACACCTTCACCTACACGGGGC	MED12	47.59	1036.0	0.593073593	0	AZD_200nM	0.5748682815249019
742	CTGCAGCTCACACCTTCACCTACACGGGGC	MED12	47.59	1036.0	0.7056277059999999	0	PLX_2uM	0.5748682815249019
743	CACCAGCTCAGTCTTGTCAATGTCGGGGGG	CD13	15.51	150.0	0.303296703	0	nodrug	0.39890632083318345
744	TTGAAGCTCATAGACTTCTCACACAGGATA	TADA1	15.52	52.0	0.76146789	0	AZD_200nM	0.7011953786543369
745	CTCCAGCTCCTCCCAGATTGCAGCTGGTGC	CD5	32.39	160.0	0.175732218	0	nodrug	0.43182376966183067
746	AACCAGCTCCTCTTCAGCATTCTCAGGATA	NF2	17.48	104.0	0.33632287	0	PLX_2uM	0.5474669853066069
747	GATAAGCTGAAAAAGGGAGTCAAAGGGGTA	CUL3	52.21	401.0	0.876623377	1	PLX_2uM	0.5683908485790609
748	CGGAAGCTGAAAGAGAGACAGCGGCGGAAG	TADA2B	51.9	218.0	0.847368421	1	AZD_200nM	0.6626071367484706
749	AGACAGCTGACCTGTTGGCTGAAAAGGCCC	NF2	64.87	386.0	0.058295964000000006	0	PLX_2uM	0.3900224092546803
750	CACCAGCTGCAATCTGGGAGGAGCTGGAGA	CD5	31.58	156.0	0.48117154799999995	0	nodrug	0.3934952994019594
751	GCCGAGCTGCTCACCACGACGCCAGGGCTG	HPRT1	3.21	7.0	0.921875	1	6TG_2ug/mL	0.5960217841386422
752	GAGAAGCTGGATTCTGACCAGCACAGGGAG	TADA1	71.64	240.0	0.293577982	0	AZD_200nM	0.43276609468267196
753	ACTAAGCTGGCTCTGCAGTGCAGGAGGGTA	NF1	97.39	2765.0	0.07472826099999999	0	PLX_2uM	0.17195443217997589
754	CAGCAGCTGGGCTACATGCCGCTGCGGGAT	TADA2B	40.24	169.0	0.40526315799999996	0	AZD_200nM	0.5703074910604163
755	TTTCAGCTGTTGTCTATGCTGTGGAGGTTG	TADA1	53.43	179.0	0.963302752	1	AZD_200nM	0.6861862419877333
756	GTTCAGCTTCTGAATGATGTAATCAGGACA	CD45	54.69	618.0	0.238267148	0	nodrug	0.42934474521021193
757	ACAAAGCTTCTGTGACTGTTTCCAAGGATG	NF1	77.6	2203.0	0.5896739129999999	0	PLX_2uM	0.4868057024028353
758	TTAGAGCTTGTTGTCACAGTGGTGGGGGGT	CD43	40.51	160.0	0.289855072	0	nodrug	0.48857020535554957
759	CAGAAGCTTTGTTGGAGATCATGGAGGTAT	NF1	77.95	2213.0	0.610054348	0	PLX_2uM	0.6103459536009576
760	ACCCAGGAAATACATTGCTGCACAAGGTAA	CD45	48.76	551.0	0.59566787	0	nodrug	0.625428999973995
761	CAGGAGGAACAGAAGAACTTCCAGAGGAGG	MED12	57.42	1250.0	0.7142857140000001	0	AZD_200nM	0.7207611080677261
762	CAGGAGGAACAGAAGAACTTCCAGAGGAGG	MED12	57.42	1250.0	0.625541126	0	PLX_2uM	0.7207611080677261
763	CCAGAGGAAGTATTTATGGCAATCCGGAAT	NF1	83.23	2363.0	0.425271739	0	PLX_2uM	0.41573414600863307
764	ATCTAGGAAGTCTGTGCTCAGTACTGGGGC	CD45	79.73	901.0	0.465703971	0	nodrug	0.3485593849997684
765	CGGAAGGACACCAAGATGCGGATCCGGGCC	CUL3	2.34	18.0	0.253246753	0	PLX_2uM	0.3423492588890411
766	GCCAAGGACAGGCCCCTGGGCCTGGGGAAC	CD5	39.68	196.0	0.10878661099999999	0	nodrug	0.5575637876289471
767	GAGGAGGACAGGGGGTCGAACAGCAGGGAG	CD13	38.06	368.0	0.181318681	0	nodrug	0.35782139262452545
768	AAACAGGACCGAGTAGTCATCCTGGGGCTG	CCDC101	88.05	258.0	0.919463087	1	AZD_200nM	0.6582314458573523
769	CCGTAGGACGCGCGGTCGGTGAGCAGGCGG	CD15	42.08	223.0	0.534798535	0	nodrug	0.469079483144103
770	GAACAGGACTCTGAGCCAGGGGCCCGGCTT	MED12	53.7	1169.0	0.606060606	0	AZD_200nM	0.525035732800456
771	GAACAGGACTCTGAGCCAGGGGCCCGGCTT	MED12	53.7	1169.0	0.430735931	0	PLX_2uM	0.525035732800456
772	CTTTAGGACTTTGTCCAGGTAGCTAGGAAG	TADA2B	94.29	396.0	0.015789473999999998	0	AZD_200nM	0.32212299076081635
773	ATCAAGGAGAACTCCCTATAGCGATGGCTC	NF1	43.11	1224.0	0.528532609	0	PLX_2uM	0.6662115867470277
774	TCGAAGGAGACCATCAGCCCCTGGGGGCAG	CD43	16.46	65.0	0.666666667	0	nodrug	0.7108760306262775
775	GAGCAGGAGAGCGACGCTGATGGCTGGGTT	THY1	3.09	5.0	0.048387097000000004	0	nodrug	0.4131095302960259
776	CGGTAGGAGAGCGTCCAGTTGAAGAGGTTA	CD15	59.25	314.0	0.919413919	1	nodrug	0.6849791600145527
777	AAGAAGGAGATGGTGTGGAATTGATGGAAG	NF1	38.57	1095.0	0.5353260870000001	0	PLX_2uM	0.4527933254728977
778	GGTAAGGAGATGTGGGAGTCAGGAGGGATT	NF1	97.08	2756.0	0.035326087	0	PLX_2uM	0.2206900072633734
779	AGCCAGGAGCACAGAAGCCTCAGGAGGGCA	NF2	22.86	136.0	0.399103139	0	PLX_2uM	0.5787539442205584
780	TTTGAGGAGCAGGTGAGGGTCTTCAGGAAC	CD45	57.79	653.0	0.028880866	0	nodrug	0.3181331511011454
781	GTGCAGGAGCCCAATTTCGGGCACCGGCTG	CD15	74.72	396.0	0.11355311400000001	0	nodrug	0.45282520074589533
782	GAGAAGGAGCTGCGCCTGAAGCTGAGGCCG	TADA2B	61.67	259.0	0.39473684200000003	0	AZD_200nM	0.5838660500614352
783	TCTGAGGAGGAACTGATGATGGCATGGAAG	NF1	47.52	1349.0	0.9972826090000001	1	PLX_2uM	0.6587130320792101
784	CTGCAGGAGGACATCCTGGAAAATGGGAGC	MED12	26.0	566.0	0.245670996	0	AZD_200nM	0.513342190804169
785	CTGCAGGAGGACATCCTGGAAAATGGGAGC	MED12	26.0	566.0	0.267316017	0	PLX_2uM	0.513342190804169
786	TGTTAGGAGTTACTCACCCATGAAAGGGTC	MED12	8.45	184.0	0.9090909090000001	1	AZD_200nM	0.592017582877745
787	TGTTAGGAGTTACTCACCCATGAAAGGGTC	MED12	8.45	184.0	0.95995671	1	PLX_2uM	0.592017582877745
788	GGGTAGGATCTACAAGAGTAGGATTGGTAG	MED12	91.04	1982.0	0.21103896100000002	0	AZD_200nM	0.33447926726242166
789	GGGTAGGATCTACAAGAGTAGGATTGGTAG	MED12	91.04	1982.0	0.15584415599999998	0	PLX_2uM	0.33447926726242166
790	AATGAGGATGGGGAAAACCCCCAGCGGCAG	MED12	61.55	1340.0	0.872294372	1	AZD_200nM	0.7715263144260204
791	AATGAGGATGGGGAAAACCCCCAGCGGCAG	MED12	61.55	1340.0	0.8008658009999999	1	PLX_2uM	0.7715263144260204
792	ATCCAGGATGTGTTCTGAACCAGCAGGCTT	THY1	84.57	137.0	0.7580645159999999	0	nodrug	0.5824832404685815
793	TGGCAGGATTGAAGCTGACGTTCTTGGCAC	MED12	2.8	61.0	0.448051948	0	AZD_200nM	0.3720158775003454
794	TGGCAGGATTGAAGCTGACGTTCTTGGCAC	MED12	2.8	61.0	0.390692641	0	PLX_2uM	0.3720158775003454
795	ATTCAGGCAACATCTACAGGCAACTGGTGT	CUL3	64.19	493.0	0.47402597399999996	0	PLX_2uM	0.5529725825559471
796	GTCCAGGCACTACTCACATTGTTAGGGGTC	MED12	63.02	1372.0	0.31168831199999997	0	AZD_200nM	0.5053259689536033
797	GTCCAGGCACTACTCACATTGTTAGGGGTC	MED12	63.02	1372.0	0.41666666700000005	0	PLX_2uM	0.5053259689536033
798	ACCAAGGCACTAGGACAGCACAGGAGGATG	MED12	17.04	371.0	0.895021645	1	AZD_200nM	0.693778461950588
799	ACCAAGGCACTAGGACAGCACAGGAGGATG	MED12	17.04	371.0	0.8863636359999999	1	PLX_2uM	0.693778461950588
800	CTGAAGGCAGCAGCAGCAGCAAGCTGGAAG	MED12	30.13	656.0	0.612554113	0	AZD_200nM	0.5712007492414639
801	CTGAAGGCAGCAGCAGCAGCAAGCTGGAAG	MED12	30.13	656.0	0.867965368	1	PLX_2uM	0.5712007492414639
802	TTCCAGGCAGGTACGTGTCAATCAAGGCAT	NF1	96.48	2739.0	0.14266304300000002	0	PLX_2uM	0.2757650124367019
803	TGAGAGGCAGTAGGCTCAGGTACAGGGGTG	CD43	24.56	97.0	0.36956521700000006	0	nodrug	0.5603146290872834
804	CAAGAGGCAGTCAGCCTGCAGATGTGGATC	NF1	13.1	372.0	0.362771739	0	PLX_2uM	0.5387304965367965
805	ATCCAGGCCAAGACCCAAACCCAGCGGGCC	CD5	75.1	371.0	0.970711297	1	nodrug	0.6300807581827935
806	TACGAGGCCAGGGAGGAGGCACTTGGGAAG	CD15	87.55	464.0	0.6117216120000001	0	nodrug	0.46874708851054003
807	TTCTAGGCCATCCCTGTCATCAATCGGGCA	CD13	67.94	657.0	0.038461537999999997	0	nodrug	0.4320247746104852
808	CCACAGGCCCAAAATCCTCATCCCTGGCAC	CD33	40.93	149.0	0.696969697	0	nodrug	0.6085752521637059
809	GGCCAGGCCTGAGGGCGGGTCGCCGGGGTG	CD15	64.34	341.0	0.029304029	0	nodrug	0.17412277894379416
810	ACGAAGGCCTGAGGTGCACAGGTGTGGTGG	CD5	34.82	172.0	0.60251046	0	nodrug	0.6303982751956246
811	ATGCAGGCCTTCCCCAGGTTCCCGTGGATG	TADA2B	27.86	117.0	0.594736842	0	AZD_200nM	0.6297622696203036
812	ATCGAGGCCTTGAAACTGAAAGAGAGGGAG	NF2	92.94	553.0	0.085201794	0	PLX_2uM	0.4126253601468619
813	TAAGAGGCGAATGTCCCATGTGAGTGGAGG	NF1	28.88	820.0	0.264945652	0	PLX_2uM	0.6532396269676592
814	TAATAGGCGCGGGGCCGGGGCCTCAGGTGT	MED12	79.51	1731.0	0.005411255	0	AZD_200nM	0.20073402182656275
815	TAATAGGCGCGGGGCCGGGGCCTCAGGTGT	MED12	79.51	1731.0	0.016233766	0	PLX_2uM	0.20073402182656275
816	GAGCAGGCGGCTCCTCATCTTCTGGGGGCA	MED12	80.25	1747.0	0.225108225	0	AZD_200nM	0.46315286491149654
817	GAGCAGGCGGCTCCTCATCTTCTGGGGGCA	MED12	80.25	1747.0	0.231601732	0	PLX_2uM	0.46315286491149654
818	TCCGAGGCGGGTGTGGACAGCGGGTGGGAG	CD13	46.95	454.0	0.41758241799999996	0	nodrug	0.5080526962568858
819	TCGTAGGCGTACTGCTGGTACCCGCGGAGG	H2-K	36.04	133.0	0.822485207	1	nodrug	0.6499636948898155
820	GGGGAGGCTGACCCTGTGGTAGGGTGGGTG	CD33	82.69	301.0	0.064935065	0	nodrug	0.3580407678372211
821	CTGGAGGCTGCTTTACCCGCTGTGGGGGCG	CCDC101	86.69	254.0	0.926174497	1	AZD_200nM	0.5663675820425244
822	GGTAAGGCTGGCTGGAGTAGCTGGGGGGCA	MED12	90.35	1967.0	0.222943723	0	AZD_200nM	0.2845325519759335
823	GGTAAGGCTGGCTGGAGTAGCTGGGGGGCA	MED12	90.35	1967.0	0.19913419899999998	0	PLX_2uM	0.2845325519759335
824	GCACAGGCTTGGTCTTGCTGCTGCTGGGCA	MED12	64.77	1410.0	0.047619048	0	AZD_200nM	0.24772174609197398
825	GCACAGGCTTGGTCTTGCTGCTGCTGGGCA	MED12	64.77	1410.0	0.07034632	0	PLX_2uM	0.24772174609197398
826	ATGAAGGGAAAGGACCAAGGGCCAAGGGGT	CD5	18.22	90.0	0.242677824	0	nodrug	0.5074294231716109
827	TCACAGGGAAGAATGTCAACATAACGGTTT	CD45	45.04	509.0	0.40433213	0	nodrug	0.6088850103682549
828	GGAAAGGGAAGGACCTCTTTGATTTGGTGT	NF2	8.07	48.0	0.174887892	0	PLX_2uM	0.4004999376949552
829	GCACAGGGAGCAGTAAAAGCTGGAGGGCTG	TADA1	69.55	233.0	0.660550459	0	AZD_200nM	0.6513411228773306
830	GCTCAGGGAGCAGTTGTTCCTACTGGGATC	CD33	26.92	98.0	0.329004329	0	nodrug	0.5374603705468542
831	ACTCAGGGCAGATTCCGCCTCCTTGGGGAT	CD33	25.55	93.0	0.33982684	0	nodrug	0.361211257976748
832	TGAAAGGGCAGGATGAACAACGCGAGGGAC	MED12	68.72	1496.0	0.616883117	0	AZD_200nM	0.6276142841765717
833	TGAAAGGGCAGGATGAACAACGCGAGGGAC	MED12	68.72	1496.0	0.62987013	0	PLX_2uM	0.6276142841765717
834	CGCCAGGGCTGCGGGTCGCCATAACGGAGC	HPRT1	0.46	1.0	0.65625	0	6TG_2ug/mL	0.5579480459607934
835	GGGGAGGGGAATAGCCATCTGCATAGGAGG	CCDC101	92.15	270.0	0.751677852	0	AZD_200nM	0.47351401535172716
836	TTGGAGGGGATTCCTTGCCGCTTCTGGAGG	TADA2B	91.19	383.0	0.110526316	0	AZD_200nM	0.1415343051455079
837	CAGCAGGGGCAGCAGTAGCAGCAGCGGCAT	CD33	1.1	4.0	0.322510823	0	nodrug	0.6141230232693938
838	CAGGAGGGGCCCGAGTATTGGGAGCGGGAG	H2-K	22.22	82.0	0.881656805	1	nodrug	0.6310936648524353
839	GGCTAGGGTAAGGACCTTGATATAGGGCTG	THY1	53.7	87.0	0.709677419	0	nodrug	0.5309982607149175
840	GCCCAGGGTGCAGTACTCACCGCCAGGCCC	CD13	51.81	501.0	0.596703297	0	nodrug	0.5677884989775293
841	GCACAGGGTGGTCCTGCGTGGTGTGGGAGG	CD13	14.58	141.0	0.6032967029999999	0	nodrug	0.49573604424398426
842	TTGCAGGTAAGATGTTTGGTATTGTGGTGG	NF1	95.03	2698.0	0.41304347799999996	0	PLX_2uM	0.2975329074727773
843	CTCCAGGTAATAGGCGCGGGGCCGGGGCCT	MED12	79.65	1734.0	0.04437229400000001	0	AZD_200nM	0.30061385887850145
844	CTCCAGGTAATAGGCGCGGGGCCGGGGCCT	MED12	79.65	1734.0	0.11038961	0	PLX_2uM	0.30061385887850145
845	GCTCAGGTACAGGGGTGCTCATGCTGGCAC	CD43	23.54	93.0	0.41304347799999996	0	nodrug	0.5547144628933474
846	TGCAAGGTATCCTTCAGAACCTTTGGGAGA	NF1	88.02	2499.0	0.19565217399999998	0	PLX_2uM	0.39088241317812206
847	AAGCAGGTCACTAAAGGGAGTCGAGGGTGT	MED12	15.8	344.0	0.41774891799999997	0	AZD_200nM	0.7166857486470837
848	AAGCAGGTCACTAAAGGGAGTCGAGGGTGT	MED12	15.8	344.0	0.66017316	0	PLX_2uM	0.7166857486470837
849	TGCCAGGTCAGGGTGATGTCAGCAGGGTAG	H2-K	62.87	232.0	0.366863905	0	nodrug	0.7038988769323454
850	GGTAAGGTCCACTACAATTTCATATGGCTT	NF1	57.77	1640.0	0.649456522	0	PLX_2uM	0.4794647792768601
851	CTGCAGGTCCGTCTGTCACAGGATTGGCTG	CD43	33.16	131.0	0.789855072	0	nodrug	0.5271289899012501
852	GTGTAGGTGAAGGTGTGAGCTGCAGGGTTC	MED12	47.31	1030.0	0.7662337659999999	0	AZD_200nM	0.6825814211311306
853	GTGTAGGTGAAGGTGTGAGCTGCAGGGTTC	MED12	47.31	1030.0	0.757575758	0	PLX_2uM	0.6825814211311306
854	ACTGAGGTGGGCAGTTTAGCAATGAGGGGG	MED12	65.78	1432.0	0.86038961	1	AZD_200nM	0.6566815574280458
855	ACTGAGGTGGGCAGTTTAGCAATGAGGGGG	MED12	65.78	1432.0	0.722943723	0	PLX_2uM	0.6566815574280458
856	ACAAAGGTGTTTCAATTCAATACCTGGAAA	NF1	68.3	1939.0	0.563858696	0	PLX_2uM	0.501377414145063
857	CCCAAGGTTCAGAGCCGCCTGGTCGGGGGC	CD5	56.48	279.0	0.368200837	0	nodrug	0.3137631617650043
858	AATGAGGTTGAAGCTTGGTATGTCAGGAGG	NF2	83.19	495.0	0.390134529	0	PLX_2uM	0.4378272844632475
859	GGTCAGGTTGGTGCCGTGGTCCTGGGGCCG	CD33	56.32	205.0	0.69047619	0	nodrug	0.5837156814576901
860	AGAAAGTAACAACGTGGAAGAGGTAGGGAA	NF1	74.08	2103.0	0.892663043	1	PLX_2uM	0.5764320316679415
861	TTTCAGTAAGAAGGAAGAGGTGTTTGGGTA	MED12	6.52	142.0	0.617965368	0	AZD_200nM	0.4195007170802417
862	TTTCAGTAAGAAGGAAGAGGTGTTTGGGTA	MED12	6.52	142.0	0.6114718610000001	0	PLX_2uM	0.4195007170802417
863	AGGGAGTACACCAAGTATCATGAGCGGCTG	NF1	59.67	1694.0	0.736413043	0	PLX_2uM	0.7588218513410385
864	AGGCAGTACAGCAGAATTAATTACAGGGCT	NF1	18.53	526.0	0.429347826	0	PLX_2uM	0.4454682410759096
865	TTGTAGTAGCCGAGCAGGGTCCTCAGGTCC	H2-K	27.1	100.0	0.378698225	0	nodrug	0.5247937397448914
866	TGGAAGTAGCGGCGATAGACCGCGGGGTTG	CD15	90.57	480.0	0.7435897440000001	0	nodrug	0.6140251824409116
867	CAAGAGTAGGATTGGTAGAAGGGTGGGTGC	MED12	90.86	1978.0	0.207792208	0	AZD_200nM	0.3567085482759957
868	CAAGAGTAGGATTGGTAGAAGGGTGGGTGC	MED12	90.86	1978.0	0.177489177	0	PLX_2uM	0.3567085482759957
869	CAGAAGTAGGCAAGCCGGCGGGACAGGTAT	MED12	13.5	294.0	0.66991342	0	AZD_200nM	0.48491248548092597
870	CAGAAGTAGGCAAGCCGGCGGGACAGGTAT	MED12	13.5	294.0	0.673160173	0	PLX_2uM	0.48491248548092597
871	AGTGAGTAGTCCTGGGGCCCAGGGAGGTGG	CD33	51.37	187.0	0.45021645	0	nodrug	0.6306266223328888
872	CCAAAGTATGAAGTACCCGTCCAATGGTGA	MED12	20.85	454.0	0.962121212	1	AZD_200nM	0.6870265720778596
873	CCAAAGTATGAAGTACCCGTCCAATGGTGA	MED12	20.85	454.0	0.9686147190000001	1	PLX_2uM	0.6870265720778596
874	CTGAAGTCAGAGCGTTCAAAACTATGGCTG	MED12	21.45	467.0	0.675324675	0	AZD_200nM	0.4776971216352388
875	CTGAAGTCAGAGCGTTCAAAACTATGGCTG	MED12	21.45	467.0	0.626623377	0	PLX_2uM	0.4776971216352388
876	TGGGAGTCAGGAGGGATTCTTCACTGGTTT	NF1	96.94	2752.0	0.08831521699999999	0	PLX_2uM	0.08517726811466177
877	CCAAAGTCAGTACTGAGCACAACAAGGAAT	NF1	1.37	39.0	0.8423913040000001	1	PLX_2uM	0.7141832144407542
878	CAGAAGTCATCAACTGTCTCATCCCGGGGC	CD45	49.2	556.0	0.501805054	0	nodrug	0.5778178243744366
879	ACTCAGTCATCTCCTAAGCTGTTTTGGGCA	CD28	69.27	151.0	0.121621622	0	nodrug	0.19266166465126772
880	CCTCAGTCCAGGGACATGTGTTAAAGGCTG	MED12	66.33	1444.0	0.17099567100000002	0	AZD_200nM	0.316131491774446
881	CCTCAGTCCAGGGACATGTGTTAAAGGCTG	MED12	66.33	1444.0	0.11904761900000001	0	PLX_2uM	0.316131491774446
882	AGGGAGTCCATGCATCTCACTCGAGGGCCC	CD43	50.13	198.0	0.5	0	nodrug	0.6564518595428418
883	GAACAGTCCGAGTGGACCGGCGAGTGGCTC	MED12	78.69	1713.0	0.304112554	0	AZD_200nM	0.5410191473259695
884	GAACAGTCCGAGTGGACCGGCGAGTGGCTC	MED12	78.69	1713.0	0.28571428600000004	0	PLX_2uM	0.5410191473259695
885	GGGGAGTCCGGGAAGCACCAACGTGGGCAG	TADA2B	23.1	97.0	0.836842105	1	AZD_200nM	0.6888348364465157
886	GAGTAGTCCTGGGGCCCAGGGAGGTGGGGG	CD33	51.1	186.0	0.03030303	0	nodrug	0.2368818315447904
887	TTCGAGTCGCCCTCGCACTCCCCGGGGCTG	CD15	57.36	304.0	0.827838828	1	nodrug	0.6857128665926424
888	TGGAAGTCGGCTACGTGGACGACACGGAGT	H2-K	13.82	51.0	0.733727811	0	nodrug	0.6879206657142035
889	GGCCAGTCGGGGGGCCCCTTCACGAGGTCG	CD15	45.85	243.0	0.5787545789999999	0	nodrug	0.5703576558130664
890	GGACAGTCTACGAAAAGCTCTTGCTGGCCA	NF1	10.81	307.0	0.92798913	1	PLX_2uM	0.49698195479298607
891	ATCAAGTCTCTGTTGGAAGAGAGGCGGATT	CCDC101	32.08	94.0	0.8053691279999999	1	AZD_200nM	0.6637780530801786
892	TAAAAGTCTGATTACTAGATTCATAGGTGT	CD45	4.78	54.0	0.332129964	0	nodrug	0.45369995235496513
893	GTTCAGTCTGCATACCTGTCCCGCCGGCTT	MED12	13.55	295.0	0.991341991	1	AZD_200nM	0.6729889294407227
894	GTTCAGTCTGCATACCTGTCCCGCCGGCTT	MED12	13.55	295.0	0.953463203	1	PLX_2uM	0.6729889294407227
895	TAATAGTCTTCACAGTCACGTAGCGGGCTG	TADA2B	87.86	369.0	0.8105263159999999	1	AZD_200nM	0.5584668209797633
896	TCATAGTCTTTCCTTCATAAGTGACGGCAA	NF1	52.84	1500.0	0.22010869600000002	0	PLX_2uM	0.628560244573473
897	TTGTAGTGAACAGGACTCTGAGCCAGGGGC	MED12	53.56	1166.0	0.20887445899999998	0	AZD_200nM	0.4924725576772733
898	TTGTAGTGAACAGGACTCTGAGCCAGGGGC	MED12	53.56	1166.0	0.21969697	0	PLX_2uM	0.4924725576772733
899	CTGTAGTGAGACACAGCTCCCGTTCGGGGC	CD5	48.99	242.0	0.89958159	1	nodrug	0.5289132886118578
900	GAGGAGTGAGTAGTCCTGGGGCCCAGGGAG	CD33	51.65	188.0	0.21645021600000003	0	nodrug	0.4604504908799441
901	TGAGAGTGCAAGTATACATGTTGTGGGAGA	MED12	28.11	612.0	0.853896104	1	AZD_200nM	0.6702469948002658
902	TGAGAGTGCAAGTATACATGTTGTGGGAGA	MED12	28.11	612.0	0.7662337659999999	0	PLX_2uM	0.6702469948002658
903	TTGCAGTGCCACTCCAGAGGATTCCGGATT	NF1	83.3	2365.0	0.9959239129999999	1	PLX_2uM	0.5164418935140241
904	ACAGAGTGCCACTTAAGCATGAACTGGAGA	CD45	72.21	816.0	0.418772563	0	nodrug	0.4274102215907772
905	CTAGAGTGCCAGGGATGAGGATTTTGGGCC	CD33	40.38	147.0	0.028138528	0	nodrug	0.1692940542389569
906	GCCCAGTGCCATTGCGGCGGGCCACGGCGA	CD13	32.26	312.0	0.020879121	0	nodrug	0.37291250806381193
907	AATGAGTGCCCAGGGCGTCCAGGCAGGCGT	MED12	93.66	2039.0	0.107142857	0	AZD_200nM	0.1796384656580562
908	AATGAGTGCCCAGGGCGTCCAGGCAGGCGT	MED12	93.66	2039.0	0.08008658	0	PLX_2uM	0.1796384656580562
909	CTGAAGTGCGCCAGAGATCACAGTGGGAGG	CD5	59.92	296.0	0.640167364	0	nodrug	0.6617259904277054
910	CCTTAGTGCTGGTGTTGGGCGTACAGGTAC	CD45	60.62	685.0	0.888086643	1	nodrug	0.5258813804040163
911	GACCAGTGGACAGAACTAGCTCAAAGGTAT	NF1	78.69	2234.0	0.875	1	PLX_2uM	0.6002393270915811
912	GGACAGTGGCGGGGCCAGGCCTGAGGGCGG	CD15	65.09	345.0	0.512820513	0	nodrug	0.5192965206846993
913	TGACAGTGGCTCTTTGTGTTATCTGGGTAA	CD28	80.28	175.0	0.324324324	0	nodrug	0.451989500995824
914	TCCTAGTGGCTGGCACTCACCTGCAGGTAG	MED12	85.03	1851.0	0.314935065	0	AZD_200nM	0.455000456339087
915	TCCTAGTGGCTGGCACTCACCTGCAGGTAG	MED12	85.03	1851.0	0.24242424199999998	0	PLX_2uM	0.455000456339087
916	CTCGAGTGGGAAGCATCATTGTGTGGGAAC	TADA1	42.39	142.0	0.541284404	0	AZD_200nM	0.6330170212721231
917	AGACAGTGGTCTCATGCACTCCATAGGTGA	NF1	41.0	1164.0	0.42255434799999997	0	PLX_2uM	0.6089174850780051
918	TGTGAGTGTATGAGTTCCTATTTGAGGGAG	CUL3	41.8	321.0	0.7792207790000001	0	PLX_2uM	0.5832454915244883
919	GAGCAGTGTCCCAGGGACATCTTTTGGCCG	NF1	65.13	1849.0	0.55298913	0	PLX_2uM	0.46480306615731115
920	CGGCAGTGTGCGCCTGGATGCCCCAGGGCG	CD15	47.92	254.0	0.527472527	0	nodrug	0.4645288321544569
921	AAGAAGTGTTGCCATCTTATCAAAAGGTCG	NF1	54.14	1537.0	0.45923913	0	PLX_2uM	0.509084957249647
922	CATCAGTTAGATAGCATTGATTTGTGGAAT	NF1	19.73	560.0	0.788043478	0	PLX_2uM	0.5371471724857826
923	TAGCAGTTATAAATAGCCTGGAAAAGGTAA	NF1	7.64	217.0	0.775815217	0	PLX_2uM	0.5292417443997036
924	CAGAAGTTATCCTTCTGGTTCACTTGGGGC	MED12	4.41	96.0	0.29220779199999997	0	AZD_200nM	0.45874463420974004
925	CAGAAGTTATCCTTCTGGTTCACTTGGGGC	MED12	4.41	96.0	0.313852814	0	PLX_2uM	0.45874463420974004
926	AAGTAGTTCACACCGTACATCTCCAGGTCC	NF2	36.13	215.0	0.695067265	0	PLX_2uM	0.5531385334642388
927	TGGAAGTTCAGCAGATGAAAGCCCAGGCCA	NF2	54.29	323.0	0.533632287	0	PLX_2uM	0.5964276943352097
928	TCGAAGTTCATCCAAACCCAGCGCTGGCCC	CD15	54.91	291.0	0.703296703	0	nodrug	0.5809946425627637
929	CCCCAGTTCATGGTTACTGGTTCCGGGAAG	CD33	16.76	61.0	0.374458874	0	nodrug	0.4289056033825061
930	ACGGAGTTCCAGAGTGTGAGGAGATGGTCT	CD13	79.63	770.0	0.786813187	0	nodrug	0.5023909210929864
931	CTGCAGTTCCGTCTGTCACAGGATTGGCTG	CD43	35.44	140.0	0.905797101	1	nodrug	0.5541999362116988
932	TATGAGTTCCTATTTGAGGGAGCAAGGTAA	CUL3	42.06	323.0	0.707792208	0	PLX_2uM	0.6068998739383736
933	CAAAAGTTCGGAGAGTGTAGGCTGAGGCTC	CD45	81.77	924.0	0.606498195	0	nodrug	0.5537392283666357
934	TGACAGTTCTGCAGCCAGGGGCCGGGGACG	CD5	62.35	308.0	0.121338912	0	nodrug	0.47131775862711617
935	GTCCAGTTGAAGAGGTTACTTGCCAGGCTT	CD15	58.49	310.0	0.24908424899999998	0	nodrug	0.49599625845943546
936	CAGGAGTTGGAGGACACAGCACATTGGAAA	CD45	69.65	787.0	0.631768953	0	nodrug	0.6336778136709508
937	TGCTAGTTGGGGGCTGAGGAGCAGGGGTGG	MED12	15.3	333.0	0.338744589	0	AZD_200nM	0.4636551078532865
938	TGCTAGTTGGGGGCTGAGGAGCAGGGGTGG	MED12	15.3	333.0	0.41233766200000005	0	PLX_2uM	0.4636551078532865
939	TTCCAGTTGGGGTCTTCTGGAAGTGGGGTG	CD13	26.68	258.0	0.42967033	0	nodrug	0.43370851278311723
940	TCAAAGTTTGAGGAATTTATGACTAGGTAA	NF1	55.44	1574.0	0.913043478	1	PLX_2uM	0.6151010782343683
941	GACAATAAAGAGGGTGTTGTTGGCAGGGAT	NF1	67.03	1903.0	0.5040760870000001	0	PLX_2uM	0.48640893068690133
942	GCGCATAAAGCGCATTCTCCAGGTAGGCCA	MED12	61.97	1349.0	0.9707792209999999	1	AZD_200nM	0.7535811263865378
943	GCGCATAAAGCGCATTCTCCAGGTAGGCCA	MED12	61.97	1349.0	0.9642857140000001	1	PLX_2uM	0.7535811263865378
944	GAAGATAAAGTCACCCTGAGGTGCTGGGCC	H2-K	60.7	224.0	0.562130178	0	nodrug	0.39711106049905626
945	ATCAATAAATAATGAGAGGTATTCAGGAGA	CUL3	50.39	387.0	0.07792207799999999	0	PLX_2uM	0.29764240902494354
946	TGTTATAAATGTGCAGACAGATTTGGGGAG	CD45	18.58	210.0	0.205776173	0	nodrug	0.3184134319569101
947	TTCAATAACCAGCCTGCTGTCTCTGGGGAT	MED12	2.39	52.0	0.40800865799999997	0	AZD_200nM	0.49017220093263886
948	TTCAATAACCAGCCTGCTGTCTCTGGGGAT	MED12	2.39	52.0	0.46645021600000003	0	PLX_2uM	0.49017220093263886
949	ATCTATAACTGTAACTCCTGGGTCAGGGAG	NF1	59.39	1686.0	0.517663043	0	PLX_2uM	0.4731254046646703
950	CTAAATAACTTGTACATGCAACCAAGGTCT	CUL3	38.67	297.0	0.9285714290000001	1	PLX_2uM	0.6807799554777051
951	CCACATAAGATGTTGTTCTAAAGTAGGAGT	NF1	72.88	2069.0	0.543478261	0	PLX_2uM	0.49061862419180013
952	CAAGATAAGGAGAATGATTTGTAGTGGCCA	NF1	9.51	270.0	0.851902174	1	PLX_2uM	0.674587105846636
953	AGGGATAATGGTTCATACTTCTTTCGGATG	CD33	32.42	118.0	0.329004329	0	nodrug	0.32656311509975156
954	CCAAATACACAGTGCCTGTGATGCGGGCTG	MED12	7.07	154.0	0.908008658	1	AZD_200nM	0.5947270810916739
955	CCAAATACACAGTGCCTGTGATGCGGGCTG	MED12	7.07	154.0	0.846320346	1	PLX_2uM	0.5947270810916739
956	TGACATACCAAGCTTCAACCTCATTGGTGA	NF2	84.03	500.0	0.264573991	0	PLX_2uM	0.4872668015155427
957	TTCAATACGTTTCTTAATAACAACTGGACT	CUL3	96.35	740.0	0.15584415599999998	0	PLX_2uM	0.07216301916555222
958	TCTCATACTGGCTGTCCTTCACCAGGGAGC	CD13	17.68	171.0	0.9164835159999999	1	nodrug	0.7705754465964413
959	GCTAATACTTCAATTTGTTTGGAGTGGAAA	CD45	11.95	135.0	0.454873646	0	nodrug	0.558304390311663
960	AACTATAGATTTATATGTACCACCAGGTGA	CD45	9.82	111.0	0.960288809	1	nodrug	0.6785906687720702
961	TCTTATAGCATAAAACATATCCATGGGGTT	CD45	21.95	248.0	0.981949458	1	nodrug	0.5933200617444353
962	CGACATAGCTCTTCCCACCGTCCCCGGCCC	CD5	62.75	310.0	0.39748954	0	nodrug	0.5522240106047713
963	CTGGATAGGGGTCCCTGTCAGGGGCGGTAC	CD28	100.0	218.0	0.72972973	0	nodrug	0.46816286828811277
964	CTATATAGGTATGTTCGTGTGCTTGGGAAT	NF1	35.29	1002.0	0.377717391	0	PLX_2uM	0.450190732949486
965	TTTGATAGGTCCGGACAAGGTCAATGGAAT	CD45	27.79	314.0	0.942238267	1	nodrug	0.5383865671685278
966	GACTATAGTAGAAATGGAGAATTCTGGGCT	CUL3	36.59	281.0	0.22077922100000003	0	PLX_2uM	0.29832579740771914
967	AATGATAGTGACTGCTTATGAGCATGGGCT	TADA1	48.06	161.0	0.871559633	1	AZD_200nM	0.6398812008399053
968	TTGGATATAGACCACGGAGATCCTTGGCAG	CD5	21.86	108.0	0.9330543929999999	1	nodrug	0.6224446541307
969	GTCTATATCTATAACTGTAACTCCTGGGTC	NF1	59.32	1684.0	0.702445652	0	PLX_2uM	0.5271195856144144
970	GAGAATATTTGGCACGAACACCTGAGGATC	CUL3	98.7	758.0	0.727272727	0	PLX_2uM	0.4470930336403093
971	TTTCATCAAAACCAGTGCAACAGGTGGCTT	NF1	71.15	2020.0	0.5584239129999999	0	PLX_2uM	0.60485809019152
972	GATCATCAAAGGGAGAGGGAGGCCGGGGAC	MED12	29.08	633.0	0.203463203	0	AZD_200nM	0.4011479081633147
973	GATCATCAAAGGGAGAGGGAGGCCGGGGAC	MED12	29.08	633.0	0.234848485	0	PLX_2uM	0.4011479081633147
974	TGGGATCAATAAAAGCTGAGGTGATGGCAG	NF1	71.5	2030.0	0.33831521700000006	0	PLX_2uM	0.417049404245492
975	CATTATCACCCACCTAGGCAGATCAGGCTC	CD5	26.52	131.0	0.577405858	0	nodrug	0.4871156047452608
976	GGTCATCACGGTGGATACCAGCACGGGGAC	CD13	57.6	557.0	0.9241758240000001	1	nodrug	0.5216945772949447
977	GTCGATCACGTTCTTTGCGTGAAGAGGAAC	MED12	67.11	1461.0	0.072510823	0	AZD_200nM	0.43665030037332564
978	GTCGATCACGTTCTTTGCGTGAAGAGGAAC	MED12	67.11	1461.0	0.087662338	0	PLX_2uM	0.43665030037332564
979	GAGAATCAGAAGCCGCAGATGAGAAGGGTT	MED12	25.22	549.0	0.519480519	0	AZD_200nM	0.49862429279466286
980	GAGAATCAGAAGCCGCAGATGAGAAGGGTT	MED12	25.22	549.0	0.475108225	0	PLX_2uM	0.49862429279466286
981	CTGTATCAGATGACTCCGGAAATGTGGGAG	NF2	30.76	183.0	0.762331839	0	PLX_2uM	0.551528189477732
982	TTTAATCAGATGATTATAACCGTGTGGAAC	CD45	45.93	519.0	0.898916968	1	nodrug	0.6817481611017507
983	TGCCATCAGCACCGCCTGCTCCAACGGAGT	CD13	78.8	762.0	0.542857143	0	nodrug	0.46552650438225524
984	CCCCATCAGCTTCCTAACCTGCAGTGGACG	CD45	87.96	994.0	0.462093863	0	nodrug	0.5742792981989597
985	TTTGATCAGGGCTTCAAGGAACCCAGGAAA	CD45	48.23	545.0	0.8592057759999999	1	nodrug	0.5996319239138669
986	CTGAATCATAGACACCAGGTCTTTGGGTTC	CD45	85.13	962.0	0.133574007	0	nodrug	0.31037334161658786
987	ATTCATCATGGTGACCCTTCCTATAGGTAA	NF1	87.53	2485.0	0.744565217	0	PLX_2uM	0.40935617595861884
988	GTCAATCATTAGATCCACATCTGCAGGCTG	NF1	13.1	372.0	0.630434783	0	PLX_2uM	0.5508468388911147
989	GTTCATCCAAACCCAGCGCTGGCCCGGGGG	CD15	54.72	290.0	0.065934066	0	nodrug	0.3477026842422722
990	CCCAATCCAAAGATTCGGTTACAAAGGGAG	MED12	22.09	481.0	0.57034632	0	AZD_200nM	0.5760783327962096
991	CCCAATCCAAAGATTCGGTTACAAAGGGAG	MED12	22.09	481.0	0.609307359	0	PLX_2uM	0.5760783327962096
992	CTCCATCCACGATGCGGTTCTGGGAGGCAG	MED12	55.67	1212.0	0.848484848	1	AZD_200nM	0.6853803650002938
993	CTCCATCCACGATGCGGTTCTGGGAGGCAG	MED12	55.67	1212.0	0.7867965370000001	0	PLX_2uM	0.6853803650002938
994	AGAAATCCAGCGTAAGAATAACAGTGGTCT	CUL3	6.38	49.0	0.5844155839999999	0	PLX_2uM	0.716180545257024
995	CCAGATCCCACAGACTGATATGGCTGGTAA	NF1	8.52	242.0	0.8165760870000001	1	PLX_2uM	0.6136041951770818
996	AAAAATCCCCGCTTGTGAACACTGGGGTCG	NF2	26.22	156.0	0.986547085	1	PLX_2uM	0.7921876193402057
997	CGAAATCCCCGTCGCAGTTGAACTCGGCAT	CD28	38.99	85.0	0.37837837799999996	0	nodrug	0.5631504595282614
998	CCTCATCCCTGGCACTCTAGAACCCGGCCA	CD33	42.31	154.0	0.9480519479999999	1	nodrug	0.6407031533657543
999	TGCCATCCCTTCACTCCTTAATGCTGGTGA	MED12	53.15	1157.0	0.79978355	0	AZD_200nM	0.523377960444315
1000	TGCCATCCCTTCACTCCTTAATGCTGGTGA	MED12	53.15	1157.0	0.787878788	0	PLX_2uM	0.523377960444315
1001	CTTCATCCCTTCTGGGGAAGCCTTGGGAAG	CD45	86.46	977.0	0.010830325	0	nodrug	0.27142404216110805
1002	TTCTATCCGACCTGAGCACAGGCTTGGTCT	MED12	65.0	1415.0	0.424242424	0	AZD_200nM	0.5613708919080488
1003	TTCTATCCGACCTGAGCACAGGCTTGGTCT	MED12	65.0	1415.0	0.5519480520000001	0	PLX_2uM	0.5613708919080488
1004	GACGATCCTCACGGTGAACGTCTTGGGTTG	NF2	3.53	21.0	0.860986547	1	PLX_2uM	0.4434347916717629
1005	GGACATCCTGGAAAATGGGAGCACTGGGAG	MED12	25.86	563.0	0.25108225100000003	0	AZD_200nM	0.42200583163124045
1006	GGACATCCTGGAAAATGGGAGCACTGGGAG	MED12	25.86	563.0	0.25432900399999997	0	PLX_2uM	0.42200583163124045
1007	CGCAATCCTGTGTGCAGAGCTGACCGGCTA	MED12	49.66	1081.0	0.9188311690000001	1	AZD_200nM	0.6542040080217855
1008	CGCAATCCTGTGTGCAGAGCTGACCGGCTA	MED12	49.66	1081.0	0.903679654	1	PLX_2uM	0.6542040080217855
1009	GGGGATCCTTTGCCACAAATTGCTGGGCTC	TADA1	37.01	124.0	0.110091743	0	AZD_200nM	0.42845920671429133
1010	TCCCATCGAATTGGCAAGGGCCTGGGGTCC	CD5	46.76	231.0	0.255230126	0	nodrug	0.5524880077514792
1011	CCTCATCGACTTTGCCATTCAGGTGGGGAA	MED12	41.11	895.0	0.6309523810000001	0	AZD_200nM	0.600447442218644
1012	CCTCATCGACTTTGCCATTCAGGTGGGGAA	MED12	41.11	895.0	0.6861471859999999	0	PLX_2uM	0.600447442218644
1013	CATAATCGCCGTGGCCCGCCGCAATGGCAC	CD13	32.06	310.0	0.796703297	0	nodrug	0.5626298078666024
1014	TGGCATCGCCTCCCCAGACCAGATTGGCCT	CD13	35.47	343.0	0.22747252699999998	0	nodrug	0.5155860941175865
1015	AGCCATCGGAATCAAATATGCGCTGGGCAC	MED12	46.67	1016.0	0.471861472	0	AZD_200nM	0.6104932287838146
1016	AGCCATCGGAATCAAATATGCGCTGGGCAC	MED12	46.67	1016.0	0.418831169	0	PLX_2uM	0.6104932287838146
1017	ACCCATCTATTCAAGCAAAAATATGGGGAA	NF1	70.31	1996.0	0.17391304300000002	0	PLX_2uM	0.41689481891137853
1018	GCTCATCTCCAGTTCATGCTTAAGTGGCAC	CD45	72.04	814.0	0.487364621	0	nodrug	0.4700505782535361
1019	CCTAATCTCCCAAAATGTTTCTACAGGAGC	NF1	20.01	568.0	0.176630435	0	PLX_2uM	0.4906925481703558
1020	CTCGATCTCGTAATCATCCCGCAGCGGCAT	TADA2B	40.48	170.0	0.7526315790000001	0	AZD_200nM	0.7121262092729059
1021	AGCAATCTCTGGCATGTGTGACTGAGGGAC	NF1	18.88	536.0	0.925271739	1	PLX_2uM	0.6147420376306918
1022	TATGATCTGCGCAAGAAAAGATCCAGGTAA	CD45	38.5	435.0	0.74368231	0	nodrug	0.5998088605274164
1023	CCCCATCTGCTCACTTGAATTCTGAGGGGC	CD13	59.88	579.0	0.126373626	0	nodrug	0.47119213868095133
1024	TACAATCTGGTGCCAGCCTTCCTGGGGAAG	TADA2B	55.48	233.0	0.673684211	0	AZD_200nM	0.6459051174284873
1025	CCTCATCTGTAAGTCTCTGCAGTGTGGCTC	CD5	41.5	205.0	0.753138075	0	nodrug	0.685885506905953
1026	AATGATCTGTGCCCGATTGATGACAGGGAT	CD13	67.84	656.0	0.416483516	0	nodrug	0.45134453675071207
1027	CTTTATCTTCAGGTCTGCTGTGATGGGTCA	H2-K	57.72	213.0	0.609467456	0	nodrug	0.46464022134001454
1028	CCCTATCTTGCTGCAGAAACTCAGAGGATT	NF1	90.95	2582.0	0.557065217	0	PLX_2uM	0.44655220670313417
1029	TTGGATCTTGGCACAATGATAACAGGGTGT	NF1	94.01	2669.0	0.315217391	0	PLX_2uM	0.40246181562046324
1030	GGATATGAATGATAGACTGGACAATGGCTT	NF1	64.14	1821.0	0.90625	1	PLX_2uM	0.6778636115435924
1031	AGGAATGACACCCACCCTACCACAGGGTCA	CD33	83.24	303.0	0.255411255	0	nodrug	0.6600367461503142
1032	CGTGATGACATCTCGGGTCTGCTTGGGCAG	MED12	75.52	1644.0	0.515151515	0	AZD_200nM	0.34698364137655047
1033	CGTGATGACATCTCGGGTCTGCTTGGGCAG	MED12	75.52	1644.0	0.452380952	0	PLX_2uM	0.34698364137655047
1034	GGCCATGACCCTGCCCCTGTGGATCGGGAA	CCDC101	45.39	133.0	0.55033557	0	AZD_200nM	0.4565275926200402
1035	ACCCATGACGCCAGTCATGGTTGTGGGCAG	MED12	86.4	1881.0	0.46428571399999996	0	AZD_200nM	0.4805338587427236
1036	ACCCATGACGCCAGTCATGGTTGTGGGCAG	MED12	86.4	1881.0	0.439393939	0	PLX_2uM	0.4805338587427236
1037	ATTAATGACGCCTTCAACCTGGCCAGGTGA	CD13	69.18	669.0	0.062637363	0	nodrug	0.4960640621023452
1038	TACCATGACTCCAATGAGTGCCCAGGGCGT	MED12	93.48	2035.0	0.177489177	0	AZD_200nM	0.373203724272459
1039	TACCATGACTCCAATGAGTGCCCAGGGCGT	MED12	93.48	2035.0	0.116883117	0	PLX_2uM	0.373203724272459
1040	TCAGATGACTCCCAGCTCTTCCTACGGTTT	MED12	88.88	1935.0	0.39177489200000004	0	AZD_200nM	0.4522696124242114
1041	TCAGATGACTCCCAGCTCTTCCTACGGTTT	MED12	88.88	1935.0	0.34199134200000003	0	PLX_2uM	0.4522696124242114
1042	GTTGATGACTTCTGGAGGATGATCTGGGAG	CD45	50.09	566.0	0.57400722	0	nodrug	0.39836601581672576
1043	CGGGATGAGACAGTTGATGACTTCTGGAGG	CD45	49.73	562.0	0.270758123	0	nodrug	0.31790747236998923
1044	ACAGATGAGGTTCCCCAGGCCCAGGGGCCT	CD5	39.47	195.0	0.853556485	1	nodrug	0.6347452748156547
1045	CTTCATGATCCATGGACATTTGACTGGTAT	NF1	22.61	642.0	0.383152174	0	PLX_2uM	0.5434610898356038
1046	AACCATGATCTATTTATGAGGAGAAGGAAA	NF2	52.1	310.0	0.7399103140000001	0	PLX_2uM	0.5652450165142353
1047	CAGGATGATGCTTGCCACAGTGCCTGGGGC	CD5	76.52	378.0	0.12552301300000002	0	nodrug	0.2624487892334776
1048	GATGATGATGTAAAATGTCTTACAAGGTAA	NF1	37.51	1065.0	0.455163043	0	PLX_2uM	0.6046985343390431
1049	CCCCATGATGTAGAGGTGGCAATCCGGCAG	MED12	10.56	230.0	0.9004329	1	AZD_200nM	0.5824992204767009
1050	CCCCATGATGTAGAGGTGGCAATCCGGCAG	MED12	10.56	230.0	0.848484848	1	PLX_2uM	0.5824992204767009
1051	GTTCATGATGTCCCGCACGGTGGTGGGGAG	CD13	55.33	535.0	0.661538462	0	nodrug	0.4621635740853465
1052	GGATATGATTGCAAGAGAGCGGAAAGGAGA	CUL3	22.53	173.0	0.448051948	0	PLX_2uM	0.7070802772102365
1053	TACCATGCACCTCCGTACCTTCATGGGGCC	CD13	74.35	719.0	0.094505495	0	nodrug	0.4260515098965985
1054	TAACATGCCACTTGATTCTTGGCTTGGTGA	CD43	61.77	244.0	0.231884058	0	nodrug	0.5420307684897898
1055	CAGCATGCCCCAAAGAGGAGGAGAAGGTGC	CD43	1.52	6.0	0.630434783	0	nodrug	0.5996691559616082
1056	TCGAATGCCGAGTTCAACTGCGACGGGGAT	CD28	40.37	88.0	0.067567568	0	nodrug	0.5010035278189452
1057	GAAAATGCTCACATGAAGAAGATGAGGCAG	CD33	76.37	278.0	0.359307359	0	nodrug	0.5894505661121127
1058	CCTGATGCTCCTGTAGAAACATTTTGGGAG	NF1	20.08	570.0	0.061141304	0	PLX_2uM	0.18791687319456551
1059	ACCAATGCTCTCACCTTAAAGTGTTGGTTG	NF1	13.84	393.0	0.823369565	1	PLX_2uM	0.6296591421736918
1060	GTGGATGCTGACAAAACCTCCCCCGGGTTC	CD5	68.22	337.0	0.694560669	0	nodrug	0.6929396151011782
1061	GGACATGCTGAGCGTGCTCATCAATGGGAC	MED12	73.04	1590.0	0.233766234	0	AZD_200nM	0.4682540216150422
1062	GGACATGCTGAGCGTGCTCATCAATGGGAC	MED12	73.04	1590.0	0.27056277100000004	0	PLX_2uM	0.4682540216150422
1063	ACTCATGCTGGATGGAGTTATCCTTGGTGT	THY1	28.4	46.0	0.24193548399999998	0	nodrug	0.5548670245785357
1064	GGGAATGCTGGGAAGTTGCAAGTGAGGTCA	NF1	98.1	2785.0	0.086956522	0	PLX_2uM	0.2017696874150029
1065	CTGCATGCTGGTTTCCTTCACGACAGGTGT	NF1	4.4	125.0	0.436141304	0	PLX_2uM	0.5184045338435078
1066	TGCCATGGACCGTCTGTGTGCTGGCGGCCG	CD15	29.43	156.0	0.49816849799999996	0	nodrug	0.6154117052073463
1067	GGACATGGACTGACCTCCACTCAAAGGTAC	MED12	92.51	2014.0	0.575757576	0	AZD_200nM	0.4602676786968943
1068	GGACATGGACTGACCTCCACTCAAAGGTAC	MED12	92.51	2014.0	0.535714286	0	PLX_2uM	0.4602676786968943
1069	AGGGATGGCCCCACAGAGGGGTGGGGGCCT	CCDC101	48.81	143.0	0.09395973199999999	0	AZD_200nM	0.36915483914599645
1070	CTTCATGGCCGGCTCATCGAAGCATGGGAA	CD13	23.16	224.0	0.68021978	0	nodrug	0.589795434492412
1071	CTCCATGGCGCCGGCGTTGAAGTCTGGCAG	CD13	36.09	349.0	0.325274725	0	nodrug	0.4193577248186095
1072	GAAGATGGCTGAATACTACCGGCCAGGGCC	MED12	9.46	206.0	0.518398268	0	AZD_200nM	0.5304641581906757
1073	GAAGATGGCTGAATACTACCGGCCAGGGCC	MED12	9.46	206.0	0.668831169	0	PLX_2uM	0.5304641581906757
1074	TGGCATGGCTGTAACTGACCACCTCGGCCA	CCDC101	61.43	180.0	0.9530201340000001	1	AZD_200nM	0.7101392237353621
1075	GTCAATGGGAAGATTCAAAGAAATGGGACT	CD45	26.19	296.0	0.38267148	0	nodrug	0.5034451650236782
1076	ACTTATGGGAGCAGTTACAGAAGATGGCTG	MED12	9.19	200.0	0.506493506	0	AZD_200nM	0.55031220038182
1077	ACTTATGGGAGCAGTTACAGAAGATGGCTG	MED12	9.19	200.0	0.478354978	0	PLX_2uM	0.55031220038182
1078	GGGTATGGGATGGAAGAAAGTGCAGGGCAC	CD33	11.54	42.0	0.9134199129999999	1	nodrug	0.7230442177233077
1079	CATCATGGGGCAAGGGCCCTATCGTGGAAC	MED12	10.06	219.0	0.048701299	0	AZD_200nM	0.6370482513979419
1080	CATCATGGGGCAAGGGCCCTATCGTGGAAC	MED12	10.06	219.0	0.060606060999999996	0	PLX_2uM	0.6370482513979419
1081	TGTGATGGGTCACATGGGCCTTTGGGGAAT	H2-K	56.1	207.0	0.44970414200000003	0	nodrug	0.4557883661367575
1082	TGTCATGGTCACACGATGTGAAGAAGGAAA	CD45	51.42	581.0	0.40794223799999996	0	nodrug	0.5619996169345053
1083	CTAGATGGTGCTGGATCTTTGCCTTGGCCA	TADA1	25.07	84.0	0.321100917	0	AZD_200nM	0.521822776714473
1084	GTCTATGGTTATGTTGTCAAGCTAAGGCGA	CD45	63.19	714.0	0.505415162	0	nodrug	0.5922612022636219
1085	AGTCATGGTTGTGGGCAGCACTCCAGGGTA	MED12	86.22	1877.0	0.436147186	0	AZD_200nM	0.3690536725988104
1086	AGTCATGGTTGTGGGCAGCACTCCAGGGTA	MED12	86.22	1877.0	0.37662337700000004	0	PLX_2uM	0.3690536725988104
1087	GAGCATGTACATCCACGGGAACCTGGGGAA	TADA2B	28.1	118.0	0.505263158	0	AZD_200nM	0.5196671297941835
1088	TGGTATGTCAGGAGGCAACGGTGCTGGAAT	NF2	82.35	490.0	0.32735426	0	PLX_2uM	0.4294600656802742
1089	GTGGATGTCAGTTCACGTCAAAACTGGAAG	CUL3	61.07	469.0	0.272727273	0	PLX_2uM	0.4021551635049422
1090	GCGAATGTCCCATGTGAGTGGAGGAGGATC	NF1	28.95	822.0	0.17934782600000002	0	PLX_2uM	0.5299583563374846
1091	CTCTATGTGCTCAGCCAGTTTCCCAGGACA	NF1	60.37	1714.0	0.739130435	0	PLX_2uM	0.5800154621091032
1092	CCTGATGTGCTGAAGAGATCGTTCTGGGCT	CD13	62.98	609.0	0.298901099	0	nodrug	0.41252076039451313
1093	GTAAATGTGGGTGCTGTTGTGATGAGGAAA	NF1	91.12	2587.0	0.23777173899999998	0	PLX_2uM	0.42287349421416337
1094	GCCAATGTGGTTCCTTGTTCTCAGTGGGTA	NF1	43.5	1235.0	0.773097826	0	PLX_2uM	0.5982877124721546
1095	ATGAATGTGTTATAGTTGGGCAAGAGGTTA	NF1	25.78	732.0	0.487771739	0	PLX_2uM	0.6618760127436211
1096	AGTAATGTTCCCAAACATGGCAGCTGGAAA	CD45	3.72	42.0	0.018050542	0	nodrug	0.5539688937864367
1097	TGTGATGTTGACAGAGTTAGTGAATGGAGA	CD45	78.85	891.0	0.772563177	0	nodrug	0.5503531856026312
1098	CGCCATGTTGGAGACAGTGGATGGAGGAGG	H2-K	81.3	300.0	0.455621302	0	nodrug	0.6109343623135401
1099	CGAGATGTTTCGGATTTCATTCCACGGGAA	NF2	43.53	259.0	0.829596413	1	PLX_2uM	0.5692806237842667
1100	CCTTATTAAGAAGTGGCTGTAATTTGGTTA	NF1	81.05	2301.0	0.150815217	0	PLX_2uM	0.2158134356922573
1101	TGATATTAATGACCAGTCCATGTGTGGAAG	NF1	74.78	2123.0	0.952445652	1	PLX_2uM	0.5651721108848946
1102	CCAAATTACAGCCACTTCTTAATAAGGTAA	NF1	81.23	2306.0	0.020380435	0	PLX_2uM	0.30671111574445004
1103	ATACATTACTTACATCAATGTAGCTGGCAT	CD45	47.61	538.0	0.184115523	0	nodrug	0.559801241721859
1104	GTGTATTAGCAAACGAGTGTCTCATGGGCA	NF1	79.61	2260.0	0.66576087	0	PLX_2uM	0.47833469540437423
1105	CCACATTAGGCTTAGGTTACCACAAGGATC	NF1	41.21	1170.0	0.8396739129999999	1	PLX_2uM	0.7323507333882964
1106	CGTTATTATAAACAACACTTGGCAAGGAGA	CUL3	56.9	437.0	0.350649351	0	PLX_2uM	0.5709612174624977
1107	AATCATTATGCTGAGGATTTGGAAAGGGTG	HPRT1	15.14	33.0	0.859375	1	6TG_2ug/mL	0.6743210980680404
1108	CTCTATTATTAAAGAGCATTAATATGGTCA	CUL3	78.39	602.0	0.545454545	0	PLX_2uM	0.33802304307058206
1109	TGGTATTCAGCCTCCAGAGGGGAGGGGTCA	CD45	67.96	768.0	0.33574007200000006	0	nodrug	0.5484591554032793
1110	AGGTATTCAGGAGACCTGGAGTTGAGGTTG	CUL3	49.61	381.0	0.564935065	0	PLX_2uM	0.5775533420994939
1111	TTTCATTCCACGGGAAGGAGATCTTGGGGG	NF2	42.69	254.0	0.515695067	0	PLX_2uM	0.3537094941437964
1112	TGAAATTCCAGACAAGTTTGTTGTAGGATA	HPRT1	86.24	188.0	0.171875	0	6TG_2ug/mL	0.43680749829838095
1113	AGGAATTCCGGGCATCCCTGTACAAGGGCG	CD28	26.15	57.0	0.662162162	0	nodrug	0.5522416128816711
1114	GCGGATTCCTACTGTAGGCTTGTCTGGGGA	MED12	54.85	1194.0	0.6114718610000001	0	AZD_200nM	0.32601369878980685
1115	GCGGATTCCTACTGTAGGCTTGTCTGGGGA	MED12	54.85	1194.0	0.6341991339999999	0	PLX_2uM	0.32601369878980685
1116	TGTCATTCCTGCCCACTGCTGTCCTGGCTG	CD33	80.22	292.0	0.11038961	0	nodrug	0.3301134972208946
1117	GCCAATTCGATGGGAGGCCCCGAACGGGAG	CD5	48.58	240.0	0.912133891	1	nodrug	0.5795030126207154
1118	CAAGATTCGGCCAAAAGATGTCCCTGGGAC	NF1	65.16	1850.0	0.8084239129999999	1	PLX_2uM	0.55765654217645
1119	AGTAATTCTCTCCTCCCACATTTCCGGAGT	NF2	30.76	183.0	0.188340807	0	PLX_2uM	0.252336166250036
1120	TTTTATTCTGATTGTGGGGCTTTCGGGCAT	CD45	44.25	500.0	0.046931408	0	nodrug	0.21745379036112306
1121	CACTATTCTTCAGGTATGGCTGCGGGGTCA	TADA1	64.18	215.0	0.752293578	0	AZD_200nM	0.6753773462743157
1122	CTTCATTGAACAGACCCCAGAACCAGGTCT	CD5	20.65	102.0	0.682008368	0	nodrug	0.6130329796483343
1123	CAGGATTGAACTTACTGAGAAATCAGGCTT	MED12	31.42	684.0	0.17424242399999998	0	AZD_200nM	0.39555911931808985
1124	CAGGATTGAACTTACTGAGAAATCAGGCTT	MED12	31.42	684.0	0.159090909	0	PLX_2uM	0.39555911931808985
1125	CAGGATTGATAAATCTGAGGAACATGGCAC	NF1	49.67	1410.0	0.926630435	1	PLX_2uM	0.6717399763748461
1126	ATTTATTGATGATAAGCTGAAAAAGGGAGT	CUL3	51.69	397.0	0.26623376600000004	0	PLX_2uM	0.48222561419785653
1127	CCGGATTGCCACCTCTACATCATGGGGCAA	MED12	10.34	225.0	0.706709957	0	AZD_200nM	0.6957652259248008
1128	CCGGATTGCCACCTCTACATCATGGGGCAA	MED12	10.34	225.0	0.63961039	0	PLX_2uM	0.6957652259248008
1129	CCGGATTGCCATAAATACTTCCTCTGGACT	NF1	83.06	2358.0	0.577445652	0	PLX_2uM	0.46829717293439377
1130	CAGGATTGCGATGTCATTCACCCTAGGGAA	MED12	49.2	1071.0	0.83008658	1	AZD_200nM	0.5962667821339702
1131	CAGGATTGCGATGTCATTCACCCTAGGGAA	MED12	49.2	1071.0	0.880952381	1	PLX_2uM	0.5962667821339702
1132	CTCCATTGCTTCCTGAGCAATCTCTGGCAT	NF1	19.06	541.0	0.850543478	1	PLX_2uM	0.4751159052053789
1133	AAGAATTGGAGAAGGGTCAGCACCTGGGTT	MED12	66.88	1456.0	0.322510823	0	AZD_200nM	0.476390863088713
1134	AAGAATTGGAGAAGGGTCAGCACCTGGGTT	MED12	66.88	1456.0	0.461038961	0	PLX_2uM	0.476390863088713
1135	TCTTATTGGATCCACAGAATAAAAAGGGCA	NF2	38.15	227.0	0.228699552	0	PLX_2uM	0.3188919332680448
1136	AGTCATTGTAGAGACCGGCAATCTTGGCCG	CCDC101	34.13	100.0	0.302013423	0	AZD_200nM	0.4692707534131521
1137	TGCCATTGTCTCACCGTATGAAGCAGGGAT	NF1	50.12	1423.0	0.46331521700000006	0	PLX_2uM	0.5502116517538086
1138	TGGTATTGTGGTGGGGATTCTTCATGGTAC	NF1	94.82	2692.0	0.247282609	0	PLX_2uM	0.2682561012088097
1139	TAGAATTGTTACAGTATATCAATGTGGATT	NF1	6.48	184.0	0.82201087	1	PLX_2uM	0.6984606470790589
1140	TGCCATTGTTAGAGGAGCAGCACAAGGCCT	MED12	50.53	1100.0	0.953463203	1	AZD_200nM	0.6908369861988491
1141	TGCCATTGTTAGAGGAGCAGCACAAGGCCT	MED12	50.53	1100.0	0.946969697	1	PLX_2uM	0.6908369861988491
1142	CGGCATTTACTCTACCAACTGCTCTGGAAC	NF1	44.28	1257.0	0.7173913040000001	0	PLX_2uM	0.5928429446501906
1143	TATGATTTCAGTGATGTCTTCAGAGGGAAA	NF1	31.1	883.0	0.49320652200000004	0	PLX_2uM	0.6166870388368089
1144	TTGAATTTCCTCACAGAAAGCGGCTGGATC	TADA2B	98.33	413.0	0.310526316	0	AZD_200nM	0.3039844436601564
1145	CCCAATTTCGGGCACCGGCTGCCCCGGCCC	CD15	74.15	393.0	0.10989011	0	nodrug	0.40281230105646226
1146	AGGTATTTCGTCACCGCCGTGTCCCGGCCC	H2-K	9.21	34.0	0.43195266299999996	0	nodrug	0.49721320448057704
1147	TATTATTTCTGAAGTGAATGAAGAGGGGTG	CD13	75.49	730.0	0.321978022	0	nodrug	0.48769385234214846
1148	TAAAATTTGATTTGTTGCAGGTTTTGGTTT	NF1	95.28	2705.0	0.414402174	0	PLX_2uM	0.09343888361633626
1149	TTTGATTTGGTGTGCCGGACTCTGGGGCTC	NF2	9.08	54.0	0.883408072	1	PLX_2uM	0.6646030661870346
1150	CAAGCAAAAATATGGGGAAGCCTTGGGCAG	NF1	70.45	2000.0	0.316576087	0	PLX_2uM	0.41369801891893154
1151	ACGTCAAAACTGGAAGGAATGTTTAGGGAT	CUL3	61.72	474.0	0.13636363599999998	0	PLX_2uM	0.26685672655425363
1152	TACCCAAAAGAGGGCTTTGTGCAGAGGCGA	NF1	81.44	2312.0	0.345108696	0	PLX_2uM	0.49923681532905495
1153	CATACAAAAGGAAGATTGCTGATGAGGGCA	CD45	41.95	474.0	0.530685921	0	nodrug	0.533336022814408
1154	CCACCAAACAGAAGATCTCGCCCTGGGATC	MED12	77.49	1687.0	0.847402597	1	AZD_200nM	0.6023779401543341
1155	CCACCAAACAGAAGATCTCGCCCTGGGATC	MED12	77.49	1687.0	0.79004329	0	PLX_2uM	0.6023779401543341
1156	TGCGCAAACAGGTGGCAGGAAACGTGGCAT	NF1	39.84	1131.0	0.23641304300000002	0	PLX_2uM	0.679096903877268
1157	ACCCCAAACAGTACGACCAACCGCTGGTTG	MED12	34.59	753.0	0.942640693	1	AZD_200nM	0.6823224285750074
1158	ACCCCAAACAGTACGACCAACCGCTGGTTG	MED12	34.59	753.0	0.926406926	1	PLX_2uM	0.6823224285750074
1159	CATCCAAACCCAGCGCTGGCCCGGGGGCCT	CD15	54.53	289.0	0.9670329670000001	1	nodrug	0.6484942741945913
1160	GGCACAAAGACGTCCGAGTCCGCCCGGTAG	CD15	60.75	322.0	0.89010989	1	nodrug	0.5829691996131041
1161	GTGACAAAGACTTCTGTGTCCAGAAGGGCA	CD45	1.5	17.0	0.519855596	0	nodrug	0.5515987862787236
1162	TCCTCAAAGAGAACACTGGAACTAGGGTCA	MED12	30.82	671.0	0.18614718600000002	0	AZD_200nM	0.5018587581209524
1163	TCCTCAAAGAGAACACTGGAACTAGGGTCA	MED12	30.82	671.0	0.213203463	0	PLX_2uM	0.5018587581209524
1164	TTAGCAAAGATATCTTCAGCAGTGGGGAAG	MED12	37.9	825.0	0.774891775	0	AZD_200nM	0.7022739254902254
1165	TTAGCAAAGATATCTTCAGCAGTGGGGAAG	MED12	37.9	825.0	0.972943723	1	PLX_2uM	0.7022739254902254
1166	AATCCAAAGATGGTCAAGGTCGCAAGGTAT	HPRT1	73.85	161.0	0.390625	0	6TG_2ug/mL	0.5743570778031855
1167	GGCACAAAGCGCTCGTAGTTGGCACGGTCT	CD15	83.96	445.0	0.490842491	0	nodrug	0.5667942394953541
1168	CAGACAAAGCTGTAGCGGTTAGCAGGGTTC	MED12	48.14	1048.0	0.674242424	0	AZD_200nM	0.6524785365686732
1169	CAGACAAAGCTGTAGCGGTTAGCAGGGTTC	MED12	48.14	1048.0	0.685064935	0	PLX_2uM	0.6524785365686732
1170	TGAGCAAAGGCACGGGCAGCCGGAAGGACA	CUL3	1.43	11.0	0.363636364	0	PLX_2uM	0.5885063317509068
1171	AAGACAAAGTTCACCGCCAGCGCTTGGCAG	TADA1	97.01	325.0	0.091743119	0	AZD_200nM	0.22367641081690612
1172	GTGTCAAATTCTGTGCCTTGTTGAAGGATT	NF1	41.85	1188.0	0.065217391	0	PLX_2uM	0.3877388290149582
1173	AAGACAACAAGAGCTCTTGGTTGCAGGGAT	NF1	79.08	2245.0	0.20652173899999998	0	PLX_2uM	0.33338913216768035
1174	GCCACAACAGCAGTAGCGCCACGAGGGCCA	CD43	67.09	265.0	0.601449275	0	nodrug	0.681092302495382
1175	TGAACAACAGGAACTCGTTGAAAGGGGTGA	CD45	39.47	446.0	0.78700361	0	nodrug	0.6923905085729659
1176	TCCTCAACCAGGACCAGATGGCACAGGTCT	MED12	43.41	945.0	0.7673160170000001	0	AZD_200nM	0.6711528670343254
1177	TCCTCAACCAGGACCAGATGGCACAGGTCT	MED12	43.41	945.0	0.6536796539999999	0	PLX_2uM	0.6711528670343254
1178	GCTTCAACCCCTCAAAAAGATCCCAGGGCG	MED12	77.58	1689.0	0.819264069	1	AZD_200nM	0.49929371023476943
1179	GCTTCAACCCCTCAAAAAGATCCCAGGGCG	MED12	77.58	1689.0	0.7283549779999999	0	PLX_2uM	0.49929371023476943
1180	GGCGCAACGCGTTGCTCGCTGGGGCGGTGC	CD15	81.89	434.0	0.516483516	0	nodrug	0.5221618972489893
1181	ACTGCAACGCTATCGCCCAGGGCGGGGAGG	CD13	83.14	804.0	0.049450549	0	nodrug	0.4737162717747144
1182	GCTCCAACGGAGTTCCAGAGTGTGAGGAGA	CD13	79.42	768.0	0.525274725	0	nodrug	0.5812728969345824
1183	CCCACAACTAGGCTTAGGCGTTTCTGGAAC	CD45	19.12	216.0	0.119133574	0	nodrug	0.09773410798824143
1184	CTGTCAACTATGATGACGACGACGTGGAGA	TADA2B	46.67	196.0	0.263157895	0	AZD_200nM	0.663469691310173
1185	TCTTCAACTGGACGCTCTCCTACCGGGCGG	CD15	60.38	320.0	0.934065934	1	nodrug	0.549257945927717
1186	TAGCCAACTTCACCACCAAGGATGAGGGCG	THY1	61.11	99.0	0.774193548	0	nodrug	0.5414528946879633
1187	GCTGCAAGAAAAACGTTAGTCTCTTGGCCT	CD45	20.53	232.0	0.061371840999999996	0	nodrug	0.490600949602325
1188	CAACCAAGAGCTCTTGTTGTCTTTGGGTGT	NF1	79.32	2252.0	0.11548913	0	PLX_2uM	0.2597961133566884
1189	TCTCCAAGAGGGAGTTCATCTCCTGGGGAG	MED12	63.11	1374.0	0.587662338	0	AZD_200nM	0.5562787945222492
1190	TCTCCAAGAGGGAGTTCATCTCCTGGGGAG	MED12	63.11	1374.0	0.504329004	0	PLX_2uM	0.5562787945222492
1191	TCTACAAGAGTAGGATTGGTAGAAGGGTGG	MED12	90.9	1979.0	0.1504329	0	AZD_200nM	0.3185575468400209
1192	TCTACAAGAGTAGGATTGGTAGAAGGGTGG	MED12	90.9	1979.0	0.13961039	0	PLX_2uM	0.3185575468400209
1193	AGCGCAAGATCACCAAGGAGGAGAAGGAGC	TADA2B	60.0	252.0	0.173684211	0	AZD_200nM	0.49892908819129145
1194	GCAGCAAGCACAATACCATTAAAAAGGTAC	NF2	97.14	578.0	0.062780269	0	PLX_2uM	0.08563873661800041
1195	GGTTCAAGCAGAAGATCAGCAAAGAGGAGT	TADA1	11.94	40.0	0.853211009	1	AZD_200nM	0.7203753119153733
1196	TGGCCAAGCATGGAGGAAGGCACTCGGGCT	CD45	53.01	599.0	0.61732852	0	nodrug	0.5170881596130992
1197	AAAACAAGCGTGCATACATGAACCTGGCGA	MED12	74.18	1615.0	0.291125541	0	AZD_200nM	0.5478280355952828
1198	AAAACAAGCGTGCATACATGAACCTGGCGA	MED12	74.18	1615.0	0.361471861	0	PLX_2uM	0.5478280355952828
1199	CAAACAAGCTAGATCAAGAAGTACAGGAGG	CD33	22.53	82.0	0.7056277059999999	0	nodrug	0.5468596963897172
1200	CTACCAAGCTGGGACTTCCAAAGCTGGGAA	NF1	56.36	1600.0	0.956521739	1	PLX_2uM	0.5826440183990881
1201	GTTTCAAGCTTTCCACCTCAAAACTGGTCA	CD45	23.89	270.0	0.47292418799999997	0	nodrug	0.33548718014664536
1202	AGGCCAAGGACAGGCCCCTGGGCCTGGGGA	CD5	39.47	195.0	0.071129707	0	nodrug	0.3153703449393545
1203	TCTACAAGGCCAAGGACAGGCCCCTGGGCC	CD5	39.07	193.0	0.393305439	0	nodrug	0.5046175105406869
1204	GCATCAAGGCCACAGCGATTCGCACGGAGG	NF2	70.25	418.0	0.304932735	0	PLX_2uM	0.6107568593980874
1205	TGTACAAGGGCGTGAACAGCGACGTGGAAG	CD28	28.9	63.0	0.716216216	0	nodrug	0.7253199143771605
1206	GAGACAAGGTGGCTGCCCGGGTGAAGGCCG	CCDC101	56.66	166.0	0.281879195	0	AZD_200nM	0.5015839906672964
1207	GAGGCAAGTGGTATGACATGCCAAGGGCAA	MED12	39.6	862.0	0.8863636359999999	1	AZD_200nM	0.7204567259167042
1208	GAGGCAAGTGGTATGACATGCCAAGGGCAA	MED12	39.6	862.0	0.845238095	1	PLX_2uM	0.7204567259167042
1209	TAGGCAAGTGGTCAAGTGGTGAGCCGGTCT	MED12	18.01	392.0	0.8290043290000001	1	AZD_200nM	0.6075655185062555
1210	TAGGCAAGTGGTCAAGTGGTGAGCCGGTCT	MED12	18.01	392.0	0.825757576	1	PLX_2uM	0.6075655185062555
1211	CTAGCAAGTTCTTCATTATAGCTATGGTTT	NF1	34.03	966.0	0.6834239129999999	0	PLX_2uM	0.48266332287943986
1212	GTGACAATACACAGCATCAATCTTAGGCCA	NF1	15.11	429.0	0.9334239129999999	1	PLX_2uM	0.5551289989494783
1213	CCCGCAATAGTTTGTTTAAAGAGACGGTCA	CUL3	47.53	365.0	0.42207792200000005	0	PLX_2uM	0.6198976532252279
1214	TACACAATCAAGGACACAGTGGCCTGGCTC	NF2	12.27	73.0	0.430493274	0	PLX_2uM	0.5998691342974466
1215	ATGGCAATCCGGAATCCTCTGGAGTGGCAC	NF1	83.41	2368.0	0.591032609	0	PLX_2uM	0.5512726282614986
1216	ACTACAATCTGGTGCCAGCCTTCCTGGGGA	TADA2B	55.24	232.0	0.005263158	0	AZD_200nM	0.26634430461645325
1217	TGTTCAATGAAGGGAAAGGACCAAGGGCCA	CD5	18.62	92.0	0.9916317990000001	1	nodrug	0.6647060288199289
1218	AGGGCAATGAGCAGAGTTTCCGAGTGGACC	H2-K	26.02	96.0	0.976331361	1	nodrug	0.7120392424494197
1219	GAAACAATGATGTTAAATCTGGTCAGGTAA	NF1	35.08	996.0	0.419836957	0	PLX_2uM	0.5011002659522427
1220	ACCTCAATGTGACGGGCTATTACCGGGTGA	CD13	65.15	630.0	0.584615385	0	nodrug	0.5776256224259638
1221	CCCTCAATGTGGCTCAGAGATACGTGGTGG	CCDC101	96.59	283.0	0.11409396	0	AZD_200nM	0.46596672319477317
1222	AAGACAATTCAGTAGTTTCCAAGGGGGTCA	CD43	19.49	77.0	0.804347826	1	nodrug	0.76590311728773
1223	ATCACAATTCGTAATAAAGGATCCAGGAGT	NF1	45.86	1302.0	0.672554348	0	PLX_2uM	0.5892986698293234
1224	GAACCAATTGTAAAGGTGGTTGAAAGGGAA	CUL3	34.51	265.0	1.0	1	PLX_2uM	0.545815315676851
1225	TGCCCACAACCATGACTGGCGTCATGGGTT	MED12	86.59	1885.0	0.294372294	0	AZD_200nM	0.43481388456620157
1226	TGCCCACAACCATGACTGGCGTCATGGGTT	MED12	86.59	1885.0	0.29978355	0	PLX_2uM	0.43481388456620157
1227	TGTGCACAATCATCGCACTGTCAGTGGTGT	CD13	3.1	30.0	0.337362637	0	nodrug	0.5554027096375569
1228	TCTGCACAATGAGAACTCCGACAGGGGTGG	NF2	95.29	567.0	0.022421525	0	PLX_2uM	0.3244642731159863
1229	GTGGCACACACTTCGAAGTTGAGGGGGGAA	NF1	47.9	1360.0	0.7826086959999999	0	PLX_2uM	0.6365059166854194
1230	CTCTCACACTATTCAGGTGATCTCTGGCTG	H2-K	32.25	119.0	0.437869822	0	nodrug	0.3653312254846694
1231	TTGACACACTTGCAGAAACAGTATTGGCTG	NF1	42.27	1200.0	0.622282609	0	PLX_2uM	0.5011575477662752
1232	AAGGCACAGAACAACCCTGTCTGCTGGGAT	CD45	88.5	1000.0	0.375451264	0	nodrug	0.43182702071446555
1233	AGGGCACAGAGCTGCTGCTTGGAGTGGATG	NF2	39.5	235.0	0.7354260090000001	0	PLX_2uM	0.5435340188143651
1234	AGCACACAGAGGGCTACAATGTGATGGCCT	HPRT1	27.98	61.0	0.765625	0	6TG_2ug/mL	0.6536820750021627
1235	GGTACACAGAGGTCTTATAAGAGGAGGGTT	MED12	86.91	1892.0	0.5519480520000001	0	AZD_200nM	0.5051175255113753
1236	GGTACACAGAGGTCTTATAAGAGGAGGGTT	MED12	86.91	1892.0	0.438311688	0	PLX_2uM	0.5051175255113753
1237	ACTACACAGAGTCAAGATTCAAACAGGTAT	CUL3	87.89	675.0	0.233766234	0	PLX_2uM	0.36102278556857925
1238	CCACCACAGATGCCCACTTCTGGAAGGTTC	H2-K	71.27	263.0	0.911242604	1	nodrug	0.627826327039868
1239	GCAGCACAGCGAATCAGATCTTCCAGGAGC	MED12	52.55	1144.0	0.8636363640000001	1	AZD_200nM	0.5417941737200566
1240	GCAGCACAGCGAATCAGATCTTCCAGGAGC	MED12	52.55	1144.0	0.908008658	1	PLX_2uM	0.5417941737200566
1241	AGGCCACAGCGATTCGCACGGAGGAGGAGA	NF2	70.59	420.0	0.914798206	1	PLX_2uM	0.5167754840447933
1242	AATTCACAGTAATGTTCCCAAACATGGCAG	CD45	3.89	44.0	0.292418773	0	nodrug	0.4989792358320349
1243	AGGACACAGTGGCCTGGCTCAAAATGGACA	NF2	12.77	76.0	0.20179372199999998	0	PLX_2uM	0.3385770570907991
1244	TTGTCACAGTGGTGGGGGGTGCACTGGTTC	CD43	39.75	157.0	0.19565217399999998	0	nodrug	0.3392844939932278
1245	AGGGCACATAAGCAGGTCACTAAAGGGAGT	MED12	15.94	347.0	0.33658008700000003	0	AZD_200nM	0.47630428795419893
1246	AGGGCACATAAGCAGGTCACTAAAGGGAGT	MED12	15.94	347.0	0.338744589	0	PLX_2uM	0.47630428795419893
1247	CTGCCACATACCTGCTGGGAACGCTGGGTG	CD5	3.24	16.0	0.569037657	0	nodrug	0.4833373566540028
1248	CTGCCACATCAAGGGAATTGTTGAAGGACA	NF1	73.65	2091.0	0.9089673909999999	1	PLX_2uM	0.49940773977196024
1249	ATATCACATCCTACCCCGTAAAAAAGGAGA	NF1	22.09	627.0	0.157608696	0	PLX_2uM	0.25914640133399713
1250	ATTACACATGCCATGTGTACCATCAGGGGC	H2-K	76.96	284.0	0.289940828	0	nodrug	0.40845360887556414
1251	TTAACACATGTCCCTGGACTGAGGTGGGCA	MED12	66.05	1438.0	0.667748918	0	AZD_200nM	0.621797100397793
1252	TTAACACATGTCCCTGGACTGAGGTGGGCA	MED12	66.05	1438.0	0.8290043290000001	1	PLX_2uM	0.621797100397793
1253	CAAGCACATTGCCGTCACTTATGAAGGAAA	NF1	52.8	1499.0	0.02173913	0	PLX_2uM	0.4968257474530409
1254	TGATCACCAAACACAAGTGGGAGCAGGCTG	H2-K	45.8	169.0	0.8579881659999999	1	nodrug	0.5242830834345676
1255	CTCCCACCACAGCAGCACGCCCACCGGTCG	CD15	35.85	190.0	0.893772894	1	nodrug	0.6366351693010318
1256	ATGACACCACAGCATCATCATCTGAGGAGA	MED12	22.92	499.0	0.7867965370000001	0	AZD_200nM	0.6933072016376097
1257	ATGACACCACAGCATCATCATCTGAGGAGA	MED12	22.92	499.0	0.758658009	0	PLX_2uM	0.6933072016376097
1258	CTGTCACCACAGCTACTGGGTCTCTGGGGC	CD43	48.86	193.0	0.166666667	0	nodrug	0.25847744631259595
1259	AAACCACCACCAAGGCAATAAGCATGGGCA	CD43	64.56	255.0	0.768115942	0	nodrug	0.5908237141823098
1260	GCCTCACCACCCCGCTGCCCCCGCTGGACA	TADA2B	36.43	153.0	0.30526315800000003	0	AZD_200nM	0.43361333954364645
1261	TTTCCACCACCGCGACCTCGTGAAGGGGCC	CD15	45.85	243.0	0.721611722	0	nodrug	0.5046570435087128
1262	TGCTCACCACGACGCCAGGGCTGCGGGTCG	HPRT1	2.29	5.0	0.609375	0	6TG_2ug/mL	0.43974034860123407
1263	TGTGCACCAGCAGGCCCCCACCTATGGACA	MED12	92.1	2005.0	0.298701299	0	AZD_200nM	0.32913800729700665
1264	TGTGCACCAGCAGGCCCCCACCTATGGACA	MED12	92.1	2005.0	0.287878788	0	PLX_2uM	0.32913800729700665
1265	AGTTCACCAGCATTAAGGAGTGAAGGGATG	MED12	53.01	1154.0	0.9491341990000001	1	AZD_200nM	0.641010010434644
1266	AGTTCACCAGCATTAAGGAGTGAAGGGATG	MED12	53.01	1154.0	0.916666667	1	PLX_2uM	0.641010010434644
1267	GGGACACCAGCTCCTGCAGAGCTGAGGGAC	CD5	45.95	227.0	0.20502092100000002	0	nodrug	0.5261339776695648
1268	AATTCACCAGCTGGCCAGACCATGGGGTTC	CD45	57.35	648.0	0.790613718	0	nodrug	0.6226808362732105
1269	GGTTCACCAGGCAGGCTGTCAGGCTGGTCA	THY1	15.43	25.0	0.290322581	0	nodrug	0.5327998740083851
1270	TTGTCACCAGGCTTCCCGATCCACAGGGGC	CCDC101	45.39	133.0	0.308724832	0	AZD_200nM	0.4434145604452008
1271	AGGTCACCAGTCCCCAGTTCTCCATGGCGC	CD13	36.71	355.0	0.7813186809999999	0	nodrug	0.5529296013999785
1272	GTGGCACCATCCTCTACAAGGCCAAGGACA	CD5	38.26	189.0	0.464435146	0	nodrug	0.6283287028635427
1273	AGAACACCATCTACCTGAACCTGTGGGACC	CD13	53.46	517.0	0.479120879	0	nodrug	0.6765046945803447
1274	CCCCCACCCAAGGAGAAGATTGAAGGGACC	MED12	33.03	719.0	0.478354978	0	AZD_200nM	0.6027571120171871
1275	CCCCCACCCAAGGAGAAGATTGAAGGGACC	MED12	33.03	719.0	0.472943723	0	PLX_2uM	0.6027571120171871
1276	GCAGCACCCAGCAGACCACGGAGTGGGCCA	MED12	71.47	1556.0	0.696969697	0	AZD_200nM	0.5593321174090994
1277	GCAGCACCCAGCAGACCACGGAGTGGGCCA	MED12	71.47	1556.0	0.69047619	0	PLX_2uM	0.5593321174090994
1278	CAACCACCCCACCCACCACCGTGCCGGAGC	CD5	30.36	150.0	0.238493724	0	nodrug	0.5305445826155897
1279	AAGCCACCCCGGCGACCCGCCCTCAGGCCT	CD15	64.72	343.0	0.58974359	0	nodrug	0.4960525015300145
1280	AGGCCACCCCTTCCAGACTGTCCGAGGCAG	CD5	4.66	23.0	0.8242677820000001	1	nodrug	0.6131023117413477
1281	TGACCACCCGCTCCTTGTTGCTGCTGGAGG	CD13	38.99	377.0	0.074725275	0	nodrug	0.35185354596919666
1282	ACTACACCCTCAGCCAGGGGCACAGGGTGG	CD13	13.96	135.0	0.645054945	0	nodrug	0.6110157078506789
1283	AAGTCACCCTGAGGTGCTGGGCCCTGGGCT	H2-K	61.25	226.0	0.065088757	0	nodrug	0.215399230844711
1284	GGACCACCCTGTGCCCCTGGCTGAGGGTGT	CD13	13.65	132.0	0.567032967	0	nodrug	0.489365307770196
1285	TGAGCACCGAGGAGTGAGTAGTCCTGGGGC	CD33	52.47	191.0	0.582251082	0	nodrug	0.47046991350559697
1286	CACTCACCGGGGAGGCTGACCCTGTGGTAG	CD33	83.52	304.0	0.134199134	0	nodrug	0.5610578503266392
1287	GGCTCACCGGGTACGTGGGCTTGGTGGCAA	NF2	80.34	478.0	1.0	1	PLX_2uM	0.5350422349096835
1288	CCAGCACCGTCCGTTTCACCTGCAAGGAGG	CD13	11.69	113.0	0.598901099	0	nodrug	0.560723969159633
1289	CGTTCACCGTGAGGATCGTCACCATGGACG	NF2	4.71	28.0	0.816143498	1	PLX_2uM	0.6141462452498088
1290	TGTGCACCTCAGGCCTTCGTGTCCTGGCAC	CD5	33.4	165.0	0.355648536	0	nodrug	0.3905551655281849
1291	TTGCCACCTCTACATCATGGGGCAAGGGCC	MED12	10.24	223.0	0.823593074	1	AZD_200nM	0.5595391952472099
1292	TTGCCACCTCTACATCATGGGGCAAGGGCC	MED12	10.24	223.0	0.8019480520000001	1	PLX_2uM	0.5595391952472099
1293	CCGCCACCTGCAACAGCGGCCCAGTGGCTA	MED12	91.64	1995.0	0.30194805199999997	0	AZD_200nM	0.3656673986773969
1294	CCGCCACCTGCAACAGCGGCCCAGTGGCTA	MED12	91.64	1995.0	0.26623376600000004	0	PLX_2uM	0.3656673986773969
1295	AGTTCACCTTAACCATTGCAAACCAGGGCA	NF1	63.58	1805.0	0.692934783	0	PLX_2uM	0.5002787574140359
1296	CTCACACCTTGCAGATCCGGATCTGGGCCC	CD13	31.23	302.0	0.276923077	0	nodrug	0.4674675523224119
1297	AGGACACGAAGGCCTGAGGTGCACAGGTGT	CD5	34.41	170.0	0.70292887	0	nodrug	0.5102398131534863
1298	CCTTCACGACAGGTGTGAAGAAAATGGCAG	NF1	4.23	120.0	0.294836957	0	PLX_2uM	0.34869139508007385
1299	GTCACACGATGTGAAGAAGGAAACAGGGTA	CD45	51.68	584.0	0.30324909699999997	0	nodrug	0.3874087393208146
1300	ACTCCACGCACGTGCCCTCCAGGTAGGCCC	H2-K	49.05	181.0	0.48520710100000003	0	nodrug	0.6592537038502475
1301	GCAGCACGCCCACCGGTCGCGACGGGGTTG	CD15	35.09	186.0	0.384615385	0	nodrug	0.582624893242238
1302	CCAACACGCGCAGATCCACCTCCTCGGCAG	CD15	49.43	262.0	0.256410256	0	nodrug	0.6011684692717117
1303	CTGTCACGCGGTTGGGGATGGTGTCGGGGA	TADA2B	30.24	127.0	0.247368421	0	AZD_200nM	0.3851175406316291
1304	CGTGCACGCTGCTCCTGCTGTTGGCGGCCG	H2-K	2.71	10.0	0.579881657	0	nodrug	0.49819737143532383
1305	AAAGCACGGCCTGAGCCTCTCCGTAGGACG	CD15	43.4	230.0	0.875457875	1	nodrug	0.7121703539442156
1306	CTACCACGGCTACCAGCTGGTGGACGGCGG	TADA2B	12.86	54.0	0.736842105	0	AZD_200nM	0.576515832556258
1307	CCCGCACGGTGGTGGGGAGTTGGATGGACC	CD13	54.91	531.0	0.5527472529999999	0	nodrug	0.4877426330416329
1308	GAAGCACGTGCTCTCAGGCACCCTTGGGAT	THY1	41.36	67.0	0.225806452	0	nodrug	0.4187911458728649
1309	AGAGCACGTGCTTCCTCTTCTCTCGGGTCA	THY1	35.8	58.0	0.306451613	0	nodrug	0.517372863189382
1310	CGTCCACGTGGATGAAGGCGCCGCGGGGCA	CD15	85.66	454.0	0.747252747	0	nodrug	0.4492216260173073
1311	AGGACACTAAAGGAGACTCAGCCATGGTCC	NF1	87.81	2493.0	0.408967391	0	PLX_2uM	0.5711596163279067
1312	CAGCCACTCACCTGCCCACAGCAGGGGCAG	CD33	2.75	10.0	0.571428571	0	nodrug	0.6347711073255119
1313	GGAGCACTCACCTGGCCAGGTTGAAGGCGT	CD13	68.98	667.0	0.45274725299999996	0	nodrug	0.4124725968902331
1314	GCAGCACTCCAGGGTAAGTTGGTCGGGTGG	MED12	85.99	1872.0	0.43722943700000005	0	AZD_200nM	0.4296908887990336
1315	GCAGCACTCCAGGGTAAGTTGGTCGGGTGG	MED12	85.99	1872.0	0.48376623399999996	0	PLX_2uM	0.4296908887990336
1316	CCCACACTCTCCTTACCCCATCTCAGGGTG	H2-K	79.67	294.0	0.124260355	0	nodrug	0.33764319342898425
1317	CACACACTGCTGCCCCCGACCAGGCGGCTC	CD5	56.28	278.0	0.920502092	1	nodrug	0.6605866280656736
1318	AAGGCACTGCTGTGCCAGTCTTGCAGGTGT	THY1	8.64	14.0	0.016129031999999998	0	nodrug	0.2834255054866802
1319	GATACACTGGAAAAATGTCTTGCTGGGGTA	NF1	3.35	95.0	0.657608696	0	PLX_2uM	0.48249266628006193
1320	TAGCCACTGGGCCGCTGTTGCAGGTGGCGG	MED12	91.46	1991.0	0.21645021600000003	0	AZD_200nM	0.3019067158806132
1321	TAGCCACTGGGCCGCTGTTGCAGGTGGCGG	MED12	91.46	1991.0	0.123376623	0	PLX_2uM	0.3019067158806132
1322	ATGGCACTGGGCCGGGCCCAGATCCGGATC	CD13	31.23	302.0	0.14285714300000002	0	nodrug	0.35956327952450173
1323	TGGTCACTGTGATTGCTCATGAGCTGGCCC	CD13	40.23	389.0	0.091208791	0	nodrug	0.39663389264883075
1324	ACCCCACTTCCAGAAGACCCCAACTGGAAT	CD13	27.2	263.0	0.057142857000000005	0	nodrug	0.3829593059646108
1325	CCCCCACTTCCTGCAGGCCCTGGCCGGTAG	MED12	9.51	207.0	0.41017316	0	AZD_200nM	0.43815883115325405
1326	CCCCCACTTCCTGCAGGCCCTGGCCGGTAG	MED12	9.51	207.0	0.451298701	0	PLX_2uM	0.43815883115325405
1327	GAGGCACTTGGGAAGTCGTCCACGTGGATG	CD15	86.6	459.0	0.9487179490000001	1	nodrug	0.6170791697122726
1328	CTTCCAGAAAACAACGGCCCAGGAGGGCGG	CD5	52.02	257.0	0.774058577	0	nodrug	0.6568502895292823
1329	CTTGCAGAAACAGTATTGGCTGATCGGTTT	NF1	42.37	1203.0	0.308423913	0	PLX_2uM	0.5724775123788899
1330	CTCACAGAAAGCGGCTGGATCTCCAGGGAC	TADA2B	99.05	416.0	0.205263158	0	AZD_200nM	0.13672870596732142
1331	AGCACAGAAATTCTCAAGTGGTTGCGGGAA	NF1	21.13	600.0	0.148097826	0	PLX_2uM	0.39574592059170116
1332	CCCTCAGAACAGCATCGGTGCAGTAGGAAG	NF1	49.45	1404.0	0.625	0	PLX_2uM	0.6350493664274147
1333	CACCCAGAACCAGCCACTACCTGCAGGTGA	MED12	84.93	1849.0	0.7976190479999999	0	AZD_200nM	0.5736707754233185
1334	CACCCAGAACCAGCCACTACCTGCAGGTGA	MED12	84.93	1849.0	0.819264069	1	PLX_2uM	0.5736707754233185
1335	ACCCCAGAACCAGGTCTTCTGCCAAGGATC	CD5	21.46	106.0	0.31380753100000003	0	nodrug	0.6076190139819487
1336	GGTTCAGAACCTTCAAGATATCCTTGGTGA	MED12	35.69	777.0	0.480519481	0	AZD_200nM	0.5062272608167058
1337	GGTTCAGAACCTTCAAGATATCCTTGGTGA	MED12	35.69	777.0	0.5173160170000001	0	PLX_2uM	0.5062272608167058
1338	AGGCCAGAATTGCTTCTCTGCTGGAGGCAC	NF1	30.05	853.0	0.301630435	0	PLX_2uM	0.5985343951856418
1339	ATATCAGACACAAAGGCTCCTAAAAGGCAA	NF1	90.0	2555.0	0.45380434799999997	0	PLX_2uM	0.2495320804176137
1340	TGGTCAGACATACCTGCTGAGTGAAGGCAC	MED12	19.02	414.0	0.956709957	1	AZD_200nM	0.6903622582719724
1341	TGGTCAGACATACCTGCTGAGTGAAGGCAC	MED12	19.02	414.0	0.92965368	1	PLX_2uM	0.6903622582719724
1342	TGGACAGACATGAGTTCCTGACCTGGGTGC	MED12	11.76	256.0	0.945887446	1	AZD_200nM	0.6906347125033477
1343	TGGACAGACATGAGTTCCTGACCTGGGTGC	MED12	11.76	256.0	0.88961039	1	PLX_2uM	0.6906347125033477
1344	CCATCAGAGATGGCAGACAGCAGCAGGACT	CD13	61.74	597.0	0.431868132	0	nodrug	0.5232967538694323
1345	TACGCAGAGCACCGAGGCCGAGCCAGGTGA	NF2	33.45	199.0	0.183856502	0	PLX_2uM	0.4801438338427459
1346	AGACCAGAGCAGGAGTGGTTCATGGGGCCA	CD33	71.15	259.0	0.7510822509999999	0	nodrug	0.6267679725279843
1347	TCAGCAGAGCGAACAAAAGTCCTAGGGCAA	NF1	62.45	1773.0	0.733695652	0	PLX_2uM	0.6887478036339806
1348	TACACAGAGCGTGGCCTACTTAGCAGGTAA	NF1	85.91	2439.0	0.145380435	0	PLX_2uM	0.46342200991068455
1349	GCGCCAGAGGCAAAAGCGGAGGACTGGGGC	CD43	70.38	278.0	0.224637681	0	nodrug	0.3523334602943933
1350	GCGCCAGAGTGACAGGGACCTTATGGGCAC	CD13	69.6	673.0	0.134065934	0	nodrug	0.4490339236484997
1351	CTGGCAGAGTTGTCTCACCTTGGCAGGATT	MED12	3.12	68.0	0.255411255	0	AZD_200nM	0.42405825146072385
1352	CTGGCAGAGTTGTCTCACCTTGGCAGGATT	MED12	3.12	68.0	0.257575758	0	PLX_2uM	0.42405825146072385
1353	TCTCCAGATATGACCATGGGTTTGTGGCTC	CD45	0.44	5.0	0.6714801440000001	0	nodrug	0.42054891275176015
1354	GGAGCAGATCACGAGCTTTGCCCTTGGCAT	MED12	39.5	860.0	0.626623377	0	AZD_200nM	0.557890739199223
1355	GGAGCAGATCACGAGCTTTGCCCTTGGCAT	MED12	39.5	860.0	0.7207792209999999	0	PLX_2uM	0.557890739199223
1356	GGACCAGATGGCACAGGTCTTTGAGGGGTA	MED12	43.55	948.0	0.670995671	0	AZD_200nM	0.5854354026476677
1357	GGACCAGATGGCACAGGTCTTTGAGGGGTA	MED12	43.55	948.0	0.623376623	0	PLX_2uM	0.5854354026476677
1358	TTTTCAGATTAGTGATGATGAACCAGGTTA	HPRT1	6.42	14.0	0.515625	0	6TG_2ug/mL	0.5309841568161493
1359	GCCACAGATTCTCCAGCTATGTATCGGGAA	NF2	50.42	300.0	0.793721973	0	PLX_2uM	0.5541807408457639
1360	TGACCAGCAAAGAAGTTAAGGATGGGGCCC	CD13	33.51	324.0	0.771428571	0	nodrug	0.6069951234932531
1361	ATTGCAGCAACACACAGGCCCTGCAGGTAC	MED12	89.99	1959.0	0.25974026	0	AZD_200nM	0.33674501795139805
1362	ATTGCAGCAACACACAGGCCCTGCAGGTAC	MED12	89.99	1959.0	0.255411255	0	PLX_2uM	0.33674501795139805
1363	GCAGCAGCAACCTGCGGTGCCCCAAGGACA	MED12	87.55	1906.0	0.673160173	0	AZD_200nM	0.5006231879437798
1364	GCAGCAGCAACCTGCGGTGCCCCAAGGACA	MED12	87.55	1906.0	0.696969697	0	PLX_2uM	0.5006231879437798
1365	AGGCCAGCAAGTACGTGGACATCTTGGGCG	CD13	28.44	275.0	0.24065934100000003	0	nodrug	0.41875757490913634
1366	TTCACAGCAATTTAGATGAACAACAGGAAC	CD45	39.03	441.0	0.227436823	0	nodrug	0.38813709105120686
1367	TCTTCAGCACATCAGGCAATGAGTGGGTCC	CD13	63.91	618.0	0.950549451	1	nodrug	0.6849451300206325
1368	CCAGCAGCACCACCAGGAGTACAAGGGTCA	CD5	78.34	387.0	0.8368200840000001	1	nodrug	0.6792052708569737
1369	CCGTCAGCACCACTCTCTTGGGGCTGGTTT	MED12	78.23	1703.0	0.44047619	0	AZD_200nM	0.40107114057484544
1370	CCGTCAGCACCACTCTCTTGGGGCTGGTTT	MED12	78.23	1703.0	0.46861471899999996	0	PLX_2uM	0.40107114057484544
1371	ATACCAGCACGGGGACCCTTTCCCAGGAGC	CD13	58.12	562.0	0.556043956	0	nodrug	0.5134211611306465
1372	CCAGCAGCACTTCGTGGGAGTCCATGGATA	CD5	0.4	2.0	0.251046025	0	nodrug	0.4753182374159859
1373	CCTCCAGCAGCAACAAGGAGCGGGTGGTCA	CD13	39.4	381.0	0.7109890109999999	0	nodrug	0.6984376452122599
1374	CAGTCAGCAGCCGCTCATGATACTTGGTGT	NF1	59.6	1692.0	0.663043478	0	PLX_2uM	0.48652192266040395
1375	CCAGCAGCAGCTGCTCCTCGCGACTGGTCC	TADA2B	17.38	73.0	0.7473684209999999	0	AZD_200nM	0.47608532505333273
1376	CGAACAGCAGGGAGTTCTCCCGGTAGGTCA	CD13	37.54	363.0	0.643956044	0	nodrug	0.7042629318731324
1377	CAGCCAGCAGGTGGCGGTCGCAGGAGGAGC	MED12	55.26	1203.0	0.525974026	0	AZD_200nM	0.6083979777696932
1378	CAGCCAGCAGGTGGCGGTCGCAGGAGGAGC	MED12	55.26	1203.0	0.49350649399999996	0	PLX_2uM	0.6083979777696932
1379	CCCTCAGCATCCTTCGGAAAGCTCTGGACA	CCDC101	27.3	80.0	0.9865771809999999	1	AZD_200nM	0.5258954611816465
1380	TGCTCAGCCACAGAGATGTCCAGCGGGGGC	TADA2B	36.67	154.0	0.842105263	1	AZD_200nM	0.5599428829658033
1381	AGCACAGCCACAGCTACCCAAAAGAGGGCT	NF1	81.58	2316.0	0.792119565	0	PLX_2uM	0.5522387543807151
1382	AGGACAGCCACGATGCACAGGCACAGGCTA	MED12	42.4	923.0	0.488095238	0	AZD_200nM	0.6413480838573791
1383	AGGACAGCCACGATGCACAGGCACAGGCTA	MED12	42.4	923.0	0.590909091	0	PLX_2uM	0.6413480838573791
1384	AAAGCAGCCAGGACAGCAGTGGGCAGGAAT	CD33	81.04	295.0	0.25974026	0	nodrug	0.4683114672983838
1385	TCTGCAGCCAGGGGCCGGGGACGGTGGGAA	CD5	62.96	311.0	0.133891213	0	nodrug	0.36078325008891243
1386	GACTCAGCCATGGTCCTCTCCCAAAGGTTC	NF1	87.95	2497.0	0.426630435	0	PLX_2uM	0.5227843400556539
1387	GCCACAGCCCAGTACCAACATATTTGGACG	MED12	99.82	2173.0	0.090909091	0	AZD_200nM	0.0929109466382314
1388	GCCACAGCCCAGTACCAACATATTTGGACG	MED12	99.82	2173.0	0.100649351	0	PLX_2uM	0.0929109466382314
1389	ATTCCAGCCTCAAAATCCTCTCTCAGGAGC	TADA1	35.52	119.0	0.605504587	0	AZD_200nM	0.5530772221718968
1390	CCAGCAGCCTTTAACACATGTCCCTGGACT	MED12	66.19	1441.0	0.604978355	0	AZD_200nM	0.6131539673679266
1391	CCAGCAGCCTTTAACACATGTCCCTGGACT	MED12	66.19	1441.0	0.47943722899999996	0	PLX_2uM	0.6131539673679266
1392	TGGACAGCGAGTTCGAGGGGGAGTTGGCAG	CD13	19.13	185.0	0.7109890109999999	0	nodrug	0.5395319999661671
1393	TGCCCAGCGCATATTTGATTCCGATGGCTC	MED12	46.49	1012.0	0.277056277	0	AZD_200nM	0.5287808359730537
1394	TGCCCAGCGCATATTTGATTCCGATGGCTC	MED12	46.49	1012.0	0.298701299	0	PLX_2uM	0.5287808359730537
1395	TGATCAGCGCCGTACACGTCAAGCCGGCGG	CD15	30.38	161.0	0.395604396	0	nodrug	0.5943863225837345
1396	AACCCAGCGCTGGCCCGGGGGCCTGGGGCT	CD15	54.15	287.0	0.025641026	0	nodrug	0.1617317734431619
1397	CCGCCAGCGCTTGGCAGCCAAGGAGGGGCT	TADA1	98.21	329.0	0.376146789	0	AZD_200nM	0.28924367891711744
1398	CAACCAGCGGTTGGTCGTACTGTTTGGGGT	MED12	34.77	757.0	0.340909091	0	AZD_200nM	0.31642867633274663
1399	CAACCAGCGGTTGGTCGTACTGTTTGGGGT	MED12	34.77	757.0	0.291125541	0	PLX_2uM	0.31642867633274663
1400	TGGACAGCGTAGCTCCGGCGCCAGTGGAAG	CD15	92.08	488.0	0.274725275	0	nodrug	0.42915910049813966
1401	GTCTCAGCGTCACCCGGTAGGAATCGGGTT	CD13	8.69	84.0	0.302197802	0	nodrug	0.4482065937272441
1402	CACCCAGCGTTCCCAGCAGGTATGTGGCAG	CD5	2.43	12.0	0.9414225940000001	1	nodrug	0.6454799010693402
1403	CCAGCAGCTACCTGGGGCTGGGACTGGGGC	MED12	97.98	2133.0	0.10281385300000001	0	AZD_200nM	-0.016217465146224214
1404	CCAGCAGCTACCTGGGGCTGGGACTGGGGC	MED12	97.98	2133.0	0.038961038999999996	0	PLX_2uM	-0.016217465146224214
1405	CCACCAGCTCAGTCTTGTCAATGTCGGGGG	CD13	15.51	150.0	0.5043956039999999	0	nodrug	0.5786273506303355
1406	GGCACAGCTCGATGTCCTGGCACTCGGTGC	TADA2B	6.19	26.0	0.6315789470000001	0	AZD_200nM	0.5092849674389768
1407	TCCCCAGCTCTCTGTGCATGTGACAGGTGA	CD33	37.91	138.0	0.38311688299999996	0	nodrug	0.4565212821006466
1408	CAGGCAGCTCTTCCCCTTTCCATGTGGTAC	CD45	84.16	951.0	0.9025270759999999	1	nodrug	0.553070329559291
1409	GATACAGCTGAGGCCAAAAACCAGGGGCCG	MED12	16.49	359.0	0.927489177	1	AZD_200nM	0.7499605874009088
1410	GATACAGCTGAGGCCAAAAACCAGGGGCCG	MED12	16.49	359.0	0.943722944	1	PLX_2uM	0.7499605874009088
1411	GCGGCAGCTGCCCCCAGCAAGCGTAGGTGA	CD15	32.08	170.0	0.7692307690000001	0	nodrug	0.6165344097883546
1412	TGGGCAGCTGGCTTACCAAGTTCCAGGTGG	CD13	44.47	430.0	0.349450549	0	nodrug	0.41401805977339523
1413	ATTGCAGCTGGTGCCAGGACACGAAGGCCT	CD5	33.4	165.0	0.80334728	1	nodrug	0.6858751303882463
1414	ATCTCAGCTGTTTGCACACTGCAGAGGCCT	CD5	15.79	78.0	0.6736401670000001	0	nodrug	0.6342438162187013
1415	AGTCCAGCTTACCAGAGCAGATGACGGTGA	CD5	53.85	266.0	0.7824267779999999	0	nodrug	0.7047437785550966
1416	TTGTCAGCTTCCTCAGGAATGGGTAGGAGA	MED12	59.3	1291.0	0.5995670999999999	0	AZD_200nM	0.6660998239030218
1417	TTGTCAGCTTCCTCAGGAATGGGTAGGAGA	MED12	59.3	1291.0	0.54004329	0	PLX_2uM	0.6660998239030218
1418	TTCCCAGCTTTGGAAGTCCCAGCTTGGTAG	NF1	56.22	1596.0	0.729619565	0	PLX_2uM	0.5928596681946989
1419	GAAACAGGAAGATGGATCTGAAGTTGGTGT	CUL3	74.74	574.0	0.824675325	1	PLX_2uM	0.5739958768426772
1420	CCTACAGGAATGGATCAACATGACTGGCTT	NF1	29.59	840.0	0.881793478	1	PLX_2uM	0.5767886862969934
1421	CAAACAGGACCGAGTAGTCATCCTGGGGCT	CCDC101	88.05	258.0	0.852348993	1	AZD_200nM	0.5225236836571212
1422	CACACAGGACTATGGAATGGGCCCGGGTCG	MED12	82.91	1805.0	0.50974026	0	AZD_200nM	0.578516779544059
1423	CACACAGGACTATGGAATGGGCCCGGGTCG	MED12	82.91	1805.0	0.568181818	0	PLX_2uM	0.578516779544059
1424	GAGCCAGGAGAGAATGACCTGTCCCGGTAA	NF1	76.93	2184.0	0.472826087	0	PLX_2uM	0.47037758051593154
1425	ACTGCAGGAGGACATCCTGGAAAATGGGAG	MED12	26.0	566.0	0.24025974	0	AZD_200nM	0.28390879133081154
1426	ACTGCAGGAGGACATCCTGGAAAATGGGAG	MED12	26.0	566.0	0.212121212	0	PLX_2uM	0.28390879133081154
1427	GGTCCAGGCACTACTCACATTGTTAGGGGT	MED12	63.07	1373.0	0.188311688	0	AZD_200nM	0.3192471906322427
1428	GGTCCAGGCACTACTCACATTGTTAGGGGT	MED12	63.07	1373.0	0.140692641	0	PLX_2uM	0.3192471906322427
1429	TGGTCAGGCAGTATAATCCAAAGATGGTCA	HPRT1	71.56	156.0	0.90625	1	6TG_2ug/mL	0.5721870160140159
1430	TCCCCAGGCCCAGGGGCCTGTCCTTGGCCT	CD5	38.66	191.0	0.046025105	0	nodrug	0.3631712538784573
1431	CTCACAGGCCCCCACCCCTCTGTGGGGCCA	CCDC101	49.49	145.0	0.577181208	0	AZD_200nM	0.6359203231108551
1432	CCAGCAGGCCCCCACCTATGGACATGGACT	MED12	92.19	2007.0	0.23051948100000003	0	AZD_200nM	0.3356828093076941
1433	CCAGCAGGCCCCCACCTATGGACATGGACT	MED12	92.19	2007.0	0.243506494	0	PLX_2uM	0.3356828093076941
1434	GCCCCAGGCCCCCGGGCCAGCGCTGGGTTT	CD15	54.91	291.0	0.117216117	0	nodrug	0.35142364044041374
1435	ACCCCAGGCCCTTGCCAATTCGATGGGAGG	CD5	47.77	236.0	0.44351464399999996	0	nodrug	0.5532937544464847
1436	CGCACAGGCCGGTGGAATGGGTCCAGGCCG	NF1	0.35	10.0	0.8410326090000001	1	PLX_2uM	0.5096887862734244
1437	GGGCCAGGCCTGAGGGCGGGTCGCCGGGGT	CD15	64.34	341.0	0.296703297	0	nodrug	0.26447569579568975
1438	GGAGCAGGCGGCTCCTCATCTTCTGGGGGC	MED12	80.25	1747.0	0.11255411300000001	0	AZD_200nM	0.262036701383514
1439	GGAGCAGGCGGCTCCTCATCTTCTGGGGGC	MED12	80.25	1747.0	0.185064935	0	PLX_2uM	0.262036701383514
1440	GGGTCAGGCTGAACTCATGCTGGATGGAGT	THY1	30.86	50.0	0.33870967700000004	0	nodrug	0.5725472549801596
1441	AGCACAGGGAGCAGTAAAAGCTGGAGGGCT	TADA1	69.85	234.0	0.7431192659999999	0	AZD_200nM	0.6280657371170987
1442	TGCTCAGGGAGCAGTTGTTCCTACTGGGAT	CD33	26.92	98.0	0.279220779	0	nodrug	0.3868611803549753
1443	GACTCAGGGCAGATTCCGCCTCCTTGGGGA	CD33	25.27	92.0	0.11904761900000001	0	nodrug	0.4144011073999269
1444	GCCCCAGGGCGGGGGCCAGTCGGGGGGCCC	CD15	46.79	248.0	0.223443223	0	nodrug	0.3993508212177314
1445	GGCACAGGGTGGTCCTGCGTGGTGTGGGAG	CD13	14.58	141.0	0.196703297	0	nodrug	0.4010020030830219
1446	GAACCAGGGTTTGGGTGGTGCAGGAGGTCC	MED12	83.65	1821.0	0.37770562799999996	0	AZD_200nM	0.41780418337914454
1447	GAACCAGGGTTTGGGTGGTGCAGGAGGTCC	MED12	83.65	1821.0	0.333333333	0	PLX_2uM	0.41780418337914454
1448	GCTCCAGGTAATAGGCGCGGGGCCGGGGCC	MED12	79.65	1734.0	0.166666667	0	AZD_200nM	0.23757896350642602
1449	GCTCCAGGTAATAGGCGCGGGGCCGGGGCC	MED12	79.65	1734.0	0.17424242399999998	0	PLX_2uM	0.23757896350642602
1450	GGAACAGGTACCTTGCTAAGAATACGGATT	NF1	79.96	2270.0	0.611413043	0	PLX_2uM	0.47457938487270956
1451	AAAGCAGGTACGAGGCCAGGGAGGAGGCAC	CD15	88.11	467.0	0.388278388	0	nodrug	0.4751580471469082
1452	GGTTCAGGTAGATGGTGTTCTGGTAGGCAA	CD13	52.74	510.0	0.7384615379999999	0	nodrug	0.6574984457872481
1453	TGCTCAGGTAGGATGGCTGTTGAACGGACG	MED12	93.89	2044.0	0.20129870100000002	0	AZD_200nM	0.3255287022449201
1454	TGCTCAGGTAGGATGGCTGTTGAACGGACG	MED12	93.89	2044.0	0.18939393899999998	0	PLX_2uM	0.3255287022449201
1455	TAAGCAGGTCACTAAAGGGAGTCGAGGGTG	MED12	15.8	344.0	0.494588745	0	AZD_200nM	0.6322984999504778
1456	TAAGCAGGTCACTAAAGGGAGTCGAGGGTG	MED12	15.8	344.0	0.46969697	0	PLX_2uM	0.6322984999504778
1457	CTGCCAGGTCAGGGTGATGTCAGCAGGGTA	H2-K	63.14	233.0	0.130177515	0	nodrug	0.48315514562748335
1458	GCCACAGGTCATTCCACCACTCTATGGTCA	CD13	41.57	402.0	0.7010989009999999	0	nodrug	0.5097116816858855
1459	CCTTCAGGTCCTCTTCTAAAGCCAAGGTGG	NF1	61.01	1732.0	0.796195652	0	PLX_2uM	0.6190713246497409
1460	CTGTCAGGTGAAGTTCGCTGGAGCTGGTGT	CD33	59.89	218.0	0.149350649	0	nodrug	0.44570690164538507
1461	AGGTCAGGTTGGTGCCGTGGTCCTGGGGCC	CD33	56.32	205.0	0.37012987	0	nodrug	0.3312706976092796
1462	CACTCAGTACACCCCATACCTATCGGGATC	MED12	49.15	1070.0	0.745670996	0	AZD_200nM	0.5763080881193606
1463	CACTCAGTACACCCCATACCTATCGGGATC	MED12	49.15	1070.0	0.7175324679999999	0	PLX_2uM	0.5763080881193606
1464	AGGTCAGTCCATGTCCATAGGTGGGGGCCT	MED12	92.1	2005.0	0.34848484799999996	0	AZD_200nM	0.30453717098367794
1465	AGGTCAGTCCATGTCCATAGGTGGGGGCCT	MED12	92.1	2005.0	0.30735930699999997	0	PLX_2uM	0.30453717098367794
1466	GGGCCAGTCTCCGTGTACAGAAGTAGGCAA	MED12	13.78	300.0	0.7056277059999999	0	AZD_200nM	0.5970098764868151
1467	GGGCCAGTCTCCGTGTACAGAAGTAGGCAA	MED12	13.78	300.0	0.808441558	1	PLX_2uM	0.5970098764868151
1468	CGGACAGTCTGGAAGGGGTGGCCTAGGTAA	CD5	5.87	29.0	0.033472802999999995	0	nodrug	0.4763106197015533
1469	GTGCCAGTCTTGCAGGTGTCCCGAGGGCAG	THY1	11.11	18.0	0.806451613	1	nodrug	0.6506187140132156
1470	CACCCAGTGACCCCTCCCCTCTGGAGGCTG	CD45	68.14	770.0	0.498194946	0	nodrug	0.5657282270692736
1471	GCTCCAGTGACTATTGCAGCTCCAAGGACA	H2-K	85.37	315.0	0.686390533	0	nodrug	0.5627430458145214
1472	CAGTCAGTGAGTAGTGCCAAACCAAGGCAC	MED12	17.36	378.0	0.9209956709999999	1	AZD_200nM	0.7414532742311715
1473	CAGTCAGTGAGTAGTGCCAAACCAAGGCAC	MED12	17.36	378.0	0.837662338	1	PLX_2uM	0.7414532742311715
1474	CTGACAGTGCGATGATTGTGCACACGGCTG	CD13	2.48	24.0	0.298901099	0	nodrug	0.5672978932012129
1475	GAGACAGTGGATGGAGGAGGCTCTGGGAAG	H2-K	80.22	296.0	0.278106509	0	nodrug	0.4731117710464026
1476	TGGACAGTGGCGGGGCCAGGCCTGAGGGCG	CD15	65.09	345.0	0.35164835200000005	0	nodrug	0.49183293024300273
1477	GGCCCAGTGGCTATGTGCACCAGCAGGCCC	MED12	91.92	2001.0	0.162337662	0	AZD_200nM	0.2365700665481322
1478	GGCCCAGTGGCTATGTGCACCAGCAGGCCC	MED12	91.92	2001.0	0.206709957	0	PLX_2uM	0.2365700665481322
1479	GTGACAGTGGCTCTTTGTGTTATCTGGGTA	CD28	80.28	175.0	0.040540541	0	nodrug	0.1640325769164654
1480	TCAGCAGTGGGGAAGGCTTCAGGCCGGTTG	MED12	37.67	820.0	0.9134199129999999	1	AZD_200nM	0.5942496583730806
1481	TCAGCAGTGGGGAAGGCTTCAGGCCGGTTG	MED12	37.67	820.0	0.873376623	1	PLX_2uM	0.5942496583730806
1482	AAAACAGTGTGCAGTTCCAGTTGGAGGCTG	CD5	12.75	63.0	0.8702928870000001	1	nodrug	0.6139188379524851
1483	GTTCCAGTGTTCTCTTTGAGGACATGGAGA	MED12	31.14	678.0	0.023809524	0	AZD_200nM	0.43439059203134484
1484	GTTCCAGTGTTCTCTTTGAGGACATGGAGA	MED12	31.14	678.0	0.011904762	0	PLX_2uM	0.43439059203134484
1485	ATGTCAGTTCACGTCAAAACTGGAAGGAAT	CUL3	61.2	470.0	0.681818182	0	PLX_2uM	0.6676589217534702
1486	TCCCCAGTTCATGGTTACTGGTTCCGGGAA	CD33	16.76	61.0	0.082251082	0	nodrug	0.29690978135195467
1487	GTGACAGTTCTGCAGCCAGGGGCCGGGGAC	CD5	62.35	308.0	0.15899581599999998	0	nodrug	0.436065152139708
1488	CGCACAGTTGCTGTGTGGCTTCGATGGAAA	CD5	87.04	430.0	0.17991631800000002	0	nodrug	0.4327816603342805
1489	CCGACAGTTGGATAGGTGGCTGCAAGGTAT	NF1	88.24	2505.0	0.7540760870000001	0	PLX_2uM	0.5325982006576241
1490	ATTCCAGTTGGGGTCTTCTGGAAGTGGGGT	CD13	26.78	259.0	0.375824176	0	nodrug	0.38072219763081266
1491	CCACCAGTTTCTGCTGTCCCTTTGCGGTTC	MED12	36.06	785.0	0.084415584	0	AZD_200nM	0.40456493606777966
1492	CCACCAGTTTCTGCTGTCCCTTTGCGGTTC	MED12	36.06	785.0	0.09307359300000001	0	PLX_2uM	0.40456493606777966
1493	ACTTCATAAAGCAGTGCAAGGTTGTGGAGC	NF1	15.96	453.0	0.605978261	0	PLX_2uM	0.5239624213218677
1494	ACACCATAAGGGCCGCTCCGACCCGGGCCC	MED12	83.0	1807.0	0.438311688	0	AZD_200nM	0.4985687108237538
1495	ACACCATAAGGGCCGCTCCGACCCGGGCCC	MED12	83.0	1807.0	0.331168831	0	PLX_2uM	0.4985687108237538
1496	TGCTCATAATCACCCCACGGCCCCAGGACC	CD33	55.77	203.0	0.582251082	0	nodrug	0.5768424626480378
1497	TTTGCATACCTAATCATTATGCTGAGGATT	HPRT1	13.3	29.0	0.21875	0	6TG_2ug/mL	0.6366389798686476
1498	CATTCATACCTGAAAGATGTCAGTTGGACA	CD45	15.66	177.0	0.7039711190000001	0	nodrug	0.6608403552740866
1499	ATCTCATACTGGCTGTCCTTCACCAGGGAG	CD13	17.68	171.0	0.772527473	0	nodrug	0.5333439561325212
1500	TTTTCATAGACTGTCCTGGGAAACTGGCTG	NF1	60.37	1714.0	0.637228261	0	PLX_2uM	0.3580371770550417
1501	TCTGCATAGGAGGTGTCTTCAAACAGGACC	CCDC101	90.1	264.0	0.187919463	0	AZD_200nM	0.3402836021793396
1502	GGATCATCAAAGGGAGAGGGAGGCCGGGGA	MED12	29.08	633.0	0.074675325	0	AZD_200nM	0.3752499148277276
1503	GGATCATCAAAGGGAGAGGGAGGCCGGGGA	MED12	29.08	633.0	0.113636364	0	PLX_2uM	0.3752499148277276
1504	CCCGCATCACAGGCACTGTGTATTTGGCTA	MED12	6.84	149.0	0.053030303	0	AZD_200nM	0.21671079403003993
1505	CCCGCATCACAGGCACTGTGTATTTGGCTA	MED12	6.84	149.0	0.055194805	0	PLX_2uM	0.21671079403003993
1506	GCTCCATCACCTCTTGGGGAGTCCGGGAAG	TADA2B	24.29	102.0	0.415789474	0	AZD_200nM	0.4773944088297654
1507	TCAACATCACGCTTATCCACCCCAAGGACC	CD13	24.82	240.0	0.946153846	1	nodrug	0.7518685014102304
1508	CGGTCATCACGGTGGATACCAGCACGGGGA	CD13	57.6	557.0	0.903296703	1	nodrug	0.7021212989584723
1509	GGGTCATCAGCACCCCTCTGCGCATGGTCT	CCDC101	39.25	115.0	0.44966443	0	AZD_200nM	0.516653505537354
1510	AGCCCATCAGTTTCTGTGGGGTCAGGGACA	CD43	13.42	53.0	0.239130435	0	nodrug	0.5479494439034401
1511	ACAGCATCATCATCTGAGGAGATCTGGAGA	MED12	22.78	496.0	0.527056277	0	AZD_200nM	0.45649676189223315
1512	ACAGCATCATCATCTGAGGAGATCTGGAGA	MED12	22.78	496.0	0.558441558	0	PLX_2uM	0.45649676189223315
1513	TGTACATCCACGGGAACCTGGGGAAGGCCT	TADA2B	28.57	120.0	0.636842105	0	AZD_200nM	0.6259119372726489
1514	GGGGCATCCAGGCGCACACTGCCGAGGAGG	CD15	49.06	260.0	0.32967033	0	nodrug	0.58158506316037
1515	CATGCATCCATCCTCGTCCACTGCAGGTTA	CD45	87.96	994.0	0.5992779779999999	0	nodrug	0.5003640138627689
1516	TGCTCATCCCCAGAGACAGCAGGCTGGTTA	MED12	2.25	49.0	0.608225108	0	AZD_200nM	0.6551211356573998
1517	TGCTCATCCCCAGAGACAGCAGGCTGGTTA	MED12	2.25	49.0	0.5865800870000001	0	PLX_2uM	0.6551211356573998
1518	GTGTCATCCCGCTGCCCCAGTGGAAGGCCA	CCDC101	73.72	216.0	0.973154362	1	AZD_200nM	0.5520657030171028
1519	ACTTCATCCCTTCTGGGGAAGCCTTGGGAA	CD45	86.46	977.0	0.003610108	0	nodrug	0.32435612655043267
1520	GCCTCATCCTCAACCAGGACCAGATGGCAC	MED12	43.32	943.0	0.880952381	1	AZD_200nM	0.6425857925939827
1521	GCCTCATCCTCAACCAGGACCAGATGGCAC	MED12	43.32	943.0	0.8441558440000001	1	PLX_2uM	0.6425857925939827
1522	GCATCATCCTGACCCTTGTACTCCTGGTGG	CD5	78.54	388.0	0.276150628	0	nodrug	0.3927140415843263
1523	CTCCCATCGAATTGGCAAGGGCCTGGGGTC	CD5	46.96	232.0	0.041841004	0	nodrug	0.3963958855859079
1524	GCCTCATCGACTTTGCCATTCAGGTGGGGA	MED12	41.11	895.0	0.7294372290000001	0	AZD_200nM	0.5690845777812898
1525	GCCTCATCGACTTTGCCATTCAGGTGGGGA	MED12	41.11	895.0	0.662337662	0	PLX_2uM	0.5690845777812898
1526	AGAACATCGCCAAGGCCACAATCGAGGTTT	MED12	63.71	1387.0	0.833333333	1	AZD_200nM	0.6963774123022147
1527	AGAACATCGCCAAGGCCACAATCGAGGTTT	MED12	63.71	1387.0	0.803030303	1	PLX_2uM	0.6963774123022147
1528	AGAACATCGCCCGTGACTACAATCTGGTGC	TADA2B	54.05	227.0	0.6894736840000001	0	AZD_200nM	0.5109110159499812
1529	GAGCCATCGGAATCAAATATGCGCTGGGCA	MED12	46.67	1016.0	0.374458874	0	AZD_200nM	0.526527405240106
1530	GAGCCATCGGAATCAAATATGCGCTGGGCA	MED12	46.67	1016.0	0.467532468	0	PLX_2uM	0.526527405240106
1531	TGAGCATCGTAGACGCCAGGAGGAGGGATA	CD33	30.22	110.0	0.772727273	0	nodrug	0.6158654882558687
1532	TACCCATCTATTCAAGCAAAAATATGGGGA	NF1	70.31	1996.0	0.08152173900000001	0	PLX_2uM	0.25735309011802465
1533	ACCCCATCTCAGGGTGAGGGGCTCAGGCAG	H2-K	78.59	290.0	0.118343195	0	nodrug	0.3181382658015292
1534	CTAGCATCTCGCAAGGTAGCATGGAGGAAA	MED12	73.77	1606.0	0.8311688309999999	1	AZD_200nM	0.7681649825287331
1535	CTAGCATCTCGCAAGGTAGCATGGAGGAAA	MED12	73.77	1606.0	0.804112554	1	PLX_2uM	0.7681649825287331
1536	GAAACATCTCGTACAGTGACAAGGAGGTAG	NF2	45.21	269.0	0.8206278029999999	1	PLX_2uM	0.7599721610232423
1537	TGGGCATCTGTGGTGGTGCCTCTTGGGAAG	H2-K	73.71	272.0	0.076923077	0	nodrug	0.3197604315727352
1538	CAGCCATCTTCAGTGCCAGCACCTCGGCTT	NF2	73.11	435.0	0.246636771	0	PLX_2uM	0.6138875358213917
1539	GAAACATGAACATGGCCAGCTTCTCGGTGT	MED12	10.93	238.0	0.164502165	0	AZD_200nM	0.4075948966596949
1540	GAAACATGAACATGGCCAGCTTCTCGGTGT	MED12	10.93	238.0	0.19372294399999998	0	PLX_2uM	0.4075948966596949
1541	AGCACATGAAGACTATAGTAGAAATGGAGA	CUL3	36.2	278.0	0.305194805	0	PLX_2uM	0.40478663171254614
1542	CTTGCATGACATGAACTGGTACAGCGGCCT	TADA2B	62.62	263.0	0.9157894740000001	1	AZD_200nM	0.7357847097593397
1543	AACCCATGACGCCAGTCATGGTTGTGGGCA	MED12	86.4	1881.0	0.46969697	0	AZD_200nM	0.5111458525044162
1544	AACCCATGACGCCAGTCATGGTTGTGGGCA	MED12	86.4	1881.0	0.5995670999999999	0	PLX_2uM	0.5111458525044162
1545	GTACCATGACTCCAATGAGTGCCCAGGGCG	MED12	93.48	2035.0	0.154761905	0	AZD_200nM	0.3049901171016577
1546	GTACCATGACTCCAATGAGTGCCCAGGGCG	MED12	93.48	2035.0	0.151515152	0	PLX_2uM	0.3049901171016577
1547	AGTGCATGAGACCACTGTCTACGTTGGCAT	NF1	40.75	1157.0	0.554347826	0	PLX_2uM	0.709842220318678
1548	GGTTCATGATGTCCCGCACGGTGGTGGGGA	CD13	55.33	535.0	0.705494505	0	nodrug	0.4500914606060341
1549	CTACCATGCACCTCCGTACCTTCATGGGGC	CD13	74.35	719.0	0.324175824	0	nodrug	0.3495436890394249
1550	TACACATGCCATGTGTACCATCAGGGGCTG	H2-K	77.24	285.0	0.585798817	0	nodrug	0.6502109664570211
1551	AGCTCATGCGGGAAGCGATGGCCCCGGCCA	NF2	0.67	4.0	0.170403587	0	PLX_2uM	0.5543066969595971
1552	TGCACATGCTGCACCAGAGGCAAGTGGTAT	MED12	39.83	867.0	0.753246753	0	AZD_200nM	0.7461912072473276
1553	TGCACATGCTGCACCAGAGGCAAGTGGTAT	MED12	39.83	867.0	0.7987012990000001	0	PLX_2uM	0.7461912072473276
1554	TGCCCATGCTTATTGCCTTGGTGGTGGTTT	CD43	65.57	259.0	0.47826087	0	nodrug	0.4839071018739572
1555	TAAACATGGAGAAAAGCTCTACACTGGACT	CUL3	9.64	74.0	0.461038961	0	PLX_2uM	0.6222953080799308
1556	CCAGCATGGCATCAATTCCAATGTAGGTAC	CD45	61.06	690.0	0.8014440429999999	1	nodrug	0.598582783964074
1557	GGGTCATGGCCGACTGCTGCAGCAGGGTCA	CCDC101	41.98	123.0	0.872483221	1	AZD_200nM	0.6512718595578766
1558	AGGACATGGCCGCGCACAGGCCGGTGGAAT	NF1	0.21	6.0	0.379076087	0	PLX_2uM	0.5829515048790362
1559	CCAACATGGCGACCGTTGCTGTTCTGGTTG	H2-K	84.01	310.0	0.035502959	0	nodrug	0.1733681982627119
1560	TTCTCATGGCGGCAGTCCAGGCGAAGGTTT	THY1	21.6	35.0	0.951612903	1	nodrug	0.5737633602806812
1561	GAAGCATGGGATGAACCGGTCCGATGGCTC	MED12	44.19	962.0	0.79004329	0	AZD_200nM	0.6104361526855541
1562	GAAGCATGGGATGAACCGGTCCGATGGCTC	MED12	44.19	962.0	0.847402597	1	PLX_2uM	0.6104361526855541
1563	GGTTCATGGGGCCATTGGAGGAGCTGGTGT	CD33	72.53	264.0	0.41341991299999997	0	nodrug	0.36035032956884727
1564	AGTTCATGGTTACTGGTTCCGGGAAGGAGC	CD33	17.03	62.0	0.67965368	0	nodrug	0.6412534257113361
1565	AGATCATGGTTCCCGATACATAGCTGGAGA	NF2	50.25	299.0	0.529147982	0	PLX_2uM	0.5535146885953403
1566	TGAGCATGTACATCCACGGGAACCTGGGGA	TADA2B	28.1	118.0	0.6105263160000001	0	AZD_200nM	0.42658444938062956
1567	TTGGCATGTCATACCACTTGCCTCTGGTGC	MED12	39.87	868.0	0.457792208	0	AZD_200nM	0.4660771833763365
1568	TTGGCATGTCATACCACTTGCCTCTGGTGC	MED12	39.87	868.0	0.507575758	0	PLX_2uM	0.4660771833763365
1569	TCTCCATGTCCTCAAAGAGAACACTGGAAC	MED12	30.96	674.0	0.687229437	0	AZD_200nM	0.6491222894119947
1570	TCTCCATGTCCTCAAAGAGAACACTGGAAC	MED12	30.96	674.0	0.7824675320000001	0	PLX_2uM	0.6491222894119947
1571	CCAACATGTGACCGTGGACGTGTTCGGCCG	CD15	72.64	385.0	0.304029304	0	nodrug	0.4807014158385774
1572	CAGTCATGTTGATCCATTCCTGTAGGGAGT	NF1	29.41	835.0	0.942934783	1	PLX_2uM	0.5811840092837137
1573	AGATCATTAATGACGCCTTCAACCTGGCCA	CD13	68.98	667.0	0.7	0	nodrug	0.5495299599865519
1574	AATACATTAATGCATCCTTTGTGATGGTAG	CD45	75.13	849.0	0.9494584840000001	1	nodrug	0.5366453257476644
1575	CTATCATTCATATCCGGACCCGCTGGGAAC	NF1	64.46	1830.0	0.79076087	0	PLX_2uM	0.6145870348740574
1576	TTAACATTCTTTAAAATAGTAGTGAGGCCG	NF1	2.08	59.0	0.641304348	0	PLX_2uM	0.6481156199247369
1577	CCGACATTGACAAGACTGAGCTGGTGGAGC	CD13	16.03	155.0	0.7230769229999999	0	nodrug	0.6030254939268279
1578	AGGGCATTGCAGACAAAGCTGTAGCGGTTA	MED12	48.28	1051.0	0.746753247	0	AZD_200nM	0.6758662947661521
1579	AGGGCATTGCAGACAAAGCTGTAGCGGTTA	MED12	48.28	1051.0	0.731601732	0	PLX_2uM	0.6758662947661521
1580	GTTCCATTGCTCCTCTCGTTGTCTAGGTAA	CD28	57.34	125.0	0.527027027	0	nodrug	0.46363818933806233
1581	GTAACATTGGAATCGGGGTCAAGGAGGAAG	CD13	58.74	568.0	0.49670329700000004	0	nodrug	0.6500115796816308
1582	CCTACATTGGAATTGATGCCATGCTGGAAG	CD45	61.5	695.0	0.6028880870000001	0	nodrug	0.5054031556669013
1583	CGGTCATTGTTGAATGATTCCAGGAGGAAG	CUL3	46.48	357.0	0.642857143	0	PLX_2uM	0.7132716013469551
1584	TCCTCATTTCCACACTTAGCATTTTGGACA	CD45	6.11	69.0	0.039711191	0	nodrug	0.12389488584742278
1585	GCTGCATTTCCTGCTCAGCCTCTGCGGCCT	NF2	67.9	404.0	0.6367713	0	PLX_2uM	0.5855128035259071
1586	CTATCCAAAAGCCAAAATGGAAGATGGCCA	NF1	28.18	800.0	0.244565217	0	PLX_2uM	0.5435138703537246
1587	TCCACCAAACAGAAGATCTCGCCCTGGGAT	MED12	77.49	1687.0	0.83982684	1	AZD_200nM	0.5953935229384254
1588	TCCACCAAACAGAAGATCTCGCCCTGGGAT	MED12	77.49	1687.0	0.738095238	0	PLX_2uM	0.5953935229384254
1589	AATGCCAAACAGCAAGTAAAATTTGGGTAA	NF1	76.12	2161.0	0.12092391300000001	0	PLX_2uM	0.35841130948611377
1590	TGTTCCAAACCAGCCCCAAGAGAGTGGTGC	MED12	78.14	1701.0	0.824675325	1	AZD_200nM	0.585972361162086
1591	TGTTCCAAACCAGCCCCAAGAGAGTGGTGC	MED12	78.14	1701.0	0.80952381	1	PLX_2uM	0.585972361162086
1592	TCATCCAAACCCAGCGCTGGCCCGGGGGCC	CD15	54.53	289.0	0.7179487179999999	0	nodrug	0.5327316652079005
1593	AGCACCAAACGTAAAGCAGCAGTTTGGCCA	NF1	9.37	266.0	0.506793478	0	PLX_2uM	0.5001537551993019
1594	GTGGCCAAACTGCTGCTTTACGTTTGGTGC	NF1	9.23	262.0	0.016304348	0	PLX_2uM	0.4363043944548842
1595	ACACCCAAAGACAACAAGAGCTCTTGGTTG	NF1	79.18	2248.0	0.85326087	1	PLX_2uM	0.45506045084757163
1596	ATGACCAACACCAGGTCACGGCTCAGGTGT	MED12	38.86	846.0	0.923160173	1	AZD_200nM	0.6224540204917457
1597	ATGACCAACACCAGGTCACGGCTCAGGTGT	MED12	38.86	846.0	0.991341991	1	PLX_2uM	0.6224540204917457
1598	GTCGCCAACCCCGTCGCGACCGGTGGGCGT	CD15	35.47	188.0	0.842490842	1	nodrug	0.6138557732036714
1599	ACGACCAACCGCTGGTTGCACTCATGGCTG	MED12	34.41	749.0	0.312770563	0	AZD_200nM	0.48116502083795376
1600	ACGACCAACCGCTGGTTGCACTCATGGCTG	MED12	34.41	749.0	0.288961039	0	PLX_2uM	0.48116502083795376
1601	CCATCCAACTCCCCACCACCGTGCGGGACA	CD13	55.43	536.0	0.917582418	1	nodrug	0.6217646760704886
1602	GCAACCAAGAGCTCTTGTTGTCTTTGGGTG	NF1	79.29	2251.0	0.192934783	0	PLX_2uM	0.15368140348850637
1603	TTCTCCAAGAGGGAGTTCATCTCCTGGGGA	MED12	63.11	1374.0	0.7629870129999999	0	AZD_200nM	0.563276291063229
1604	TTCTCCAAGAGGGAGTTCATCTCCTGGGGA	MED12	63.11	1374.0	0.7943722940000001	0	PLX_2uM	0.563276291063229
1605	CGGGCCAAGATCCGAGAACTGCAGCGGTAC	TADA2B	69.52	292.0	0.8578947370000001	1	AZD_200nM	0.6431002417078577
1606	CAAACCAAGGCACTAGGACAGCACAGGAGG	MED12	17.09	372.0	0.9361471859999999	1	AZD_200nM	0.7321985127545897
1607	CAAACCAAGGCACTAGGACAGCACAGGAGG	MED12	17.09	372.0	0.9285714290000001	1	PLX_2uM	0.7321985127545897
1608	GGCACCAAGGCTCGTCCCAGAAGGAGGTGA	CD15	94.15	499.0	0.985347985	1	nodrug	0.45037455831970824
1609	GTTTCCAAGGGGGTCAAAGAAACTGGGATT	CD43	18.23	72.0	0.260869565	0	nodrug	0.5649061278973772
1610	TGGTCCAAGGTGGTGGCCGAGGCGGGGTTG	CD13	6.2	60.0	0.446153846	0	nodrug	0.5575360999179648
1611	TAATCCAAGTAAGCCATTCTCAAGAGGCAG	NF1	12.86	365.0	0.512228261	0	PLX_2uM	0.6289099228721144
1612	ATTTCCAAGTCCCTGGGCATCCTGGGGATC	CD13	1.45	14.0	0.368131868	0	nodrug	0.5679450676866994
1613	TGAACCAAGTGTTAATGGCACTCTGGGATC	MED12	5.1	111.0	0.36688311700000004	0	AZD_200nM	0.5190492210187078
1614	TGAACCAAGTGTTAATGGCACTCTGGGATC	MED12	5.1	111.0	0.37012987	0	PLX_2uM	0.5190492210187078
1615	TACACCACACTCTGCACAATTCCATGGATT	NF1	94.51	2683.0	0.32201087	0	PLX_2uM	0.3607613472516509
1616	GGAACCACAGCCCCCACTTCCTGCAGGCCC	MED12	9.69	211.0	0.334415584	0	AZD_200nM	0.5488914999174077
1617	GGAACCACAGCCCCCACTTCCTGCAGGCCC	MED12	9.69	211.0	0.514069264	0	PLX_2uM	0.5488914999174077
1618	GTCACCACAGCTACTGGGTCTCTGGGGCCC	CD43	49.11	194.0	0.81884058	1	nodrug	0.6273544071053073
1619	CTCCCCACAGGGATGAAGCTGAAATGGAAT	NF2	34.29	204.0	0.197309417	0	PLX_2uM	0.42312418403504704
1620	AATTCCACCACACCTGTGCACCTCAGGCCT	CD5	34.21	169.0	0.476987448	0	nodrug	0.4875349482144731
1621	GGCACCACCACAGATGCCCACTTCTGGAAG	H2-K	71.54	264.0	0.112426036	0	nodrug	0.2862976165021215
1622	TTTTCCACCACCGCGACCTCGTGAAGGGGC	CD15	45.85	243.0	0.838827839	1	nodrug	0.5520241866599398
1623	AAAGCCACCACCTAGAATCGAAAGGGGCTT	NF1	50.58	1436.0	0.84375	1	PLX_2uM	0.754995339143283
1624	AGCACCACCAGGAGTACAAGGGTCAGGATG	CD5	77.94	385.0	0.585774059	0	nodrug	0.5226098449863491
1625	TCAACCACCATGGACTGAACAAGTAGGAAA	NF1	12.15	345.0	0.929347826	1	PLX_2uM	0.6851750230983773
1626	GCCCCCACCCAAGGAGAAGATTGAAGGGAC	MED12	32.98	718.0	0.399350649	0	AZD_200nM	0.49874164024406914
1627	GCCCCCACCCAAGGAGAAGATTGAAGGGAC	MED12	32.98	718.0	0.49025974	0	PLX_2uM	0.49874164024406914
1628	ATTTCCACCCAGTTCCAGCGCCAGGGGCTT	MED12	98.3	2140.0	0.060606060999999996	0	AZD_200nM	0.1494186471633857
1629	ATTTCCACCCAGTTCCAGCGCCAGGGGCTT	MED12	98.3	2140.0	0.051948052	0	PLX_2uM	0.1494186471633857
1630	AGGACCACCCTGTGCCCCTGGCTGAGGGTG	CD13	13.65	132.0	0.420879121	0	nodrug	0.44273157056498597
1631	GCATCCACCGTGTGGAAGGAGATGAGGTCG	CD5	65.79	325.0	0.619246862	0	nodrug	0.6591186008669924
1632	ACTGCCACCTCCTCCCTCCTCCTCTGGAAG	MED12	57.51	1252.0	0.257575758	0	AZD_200nM	0.4030444988792853
1633	ACTGCCACCTCCTCCCTCCTCCTCTGGAAG	MED12	57.51	1252.0	0.26406926399999997	0	PLX_2uM	0.4030444988792853
1634	GCTGCCACGCCCAGGAGGATCCCCAGGATG	CD13	1.55	15.0	0.35714285700000004	0	nodrug	0.5448382256565967
1635	GATTCCACGCTTTACTTTGGTCCAAGGTGG	CD13	6.83	66.0	0.35714285700000004	0	nodrug	0.566997091828997
1636	CATTCCACGGGAAGGAGATCTTGGGGGTCA	NF2	42.52	253.0	0.923766816	1	PLX_2uM	0.7794344968236596
1637	CTGGCCACGTAGTCTCCTGAGGCAGGGATG	CCDC101	51.19	150.0	0.624161074	0	AZD_200nM	0.6631375540620008
1638	TCAACCACGTCTTTGGATATATCCTGGATT	NF1	9.97	283.0	0.828804348	1	PLX_2uM	0.4952516715619537
1639	TCGTCCACGTGGATGAAGGCGCCGCGGGGC	CD15	85.66	454.0	0.9560439559999999	1	nodrug	0.5558111286436073
1640	TATTCCACTAAAGCCTGATGAATCAGGATA	CD45	64.69	731.0	0.17328519899999997	0	nodrug	0.441438695894863
1641	ACAGCCACTCACCTGCCCACAGCAGGGGCA	CD33	2.75	10.0	0.8138528140000001	1	nodrug	0.6388233426629136
1642	CTTCCCACTCGAGGCCAGCTTGAAGGGAGA	TADA1	45.37	152.0	0.146788991	0	AZD_200nM	0.5019795649248302
1643	AGCACCACTCTCTTGGGGCTGGTTTGGAAC	MED12	78.27	1704.0	0.020562771	0	AZD_200nM	0.23880740427819938
1644	AGCACCACTCTCTTGGGGCTGGTTTGGAAC	MED12	78.27	1704.0	0.046536797000000005	0	PLX_2uM	0.23880740427819938
1645	GGATCCACTGCTCGTCCCCATCCACGGCCT	CCDC101	58.02	170.0	0.7315436240000001	0	AZD_200nM	0.5846350625817769
1646	ACATCCACTTTGCCCTCTGCTTCCAGGCCT	CD45	61.95	700.0	0.032490975	0	nodrug	0.27970430770193144
1647	GCTTCCAGAAAACAACGGCCCAGGAGGGCG	CD5	52.02	257.0	0.711297071	0	nodrug	0.6033768218695192
1648	GCAACCAGAACAGCTTCAGTGTCAGGGTTC	NF1	24.62	699.0	0.207880435	0	PLX_2uM	0.6122528822186082
1649	TTCCCCAGAACTACCTGAAGAAGCAGGTCA	CD13	74.87	724.0	0.556043956	0	nodrug	0.5638128478045952
1650	TGTTCCAGAAGGAGCAGCTCGTGCTGGCCC	CCDC101	79.86	234.0	0.838926174	1	AZD_200nM	0.43576441122613124
1651	TGAACCAGAAGGATAACTTCTGGCTGGTGA	MED12	4.73	103.0	0.12121212099999999	0	AZD_200nM	0.5807224242022168
1652	TGAACCAGAAGGATAACTTCTGGCTGGTGA	MED12	4.73	103.0	0.10281385300000001	0	PLX_2uM	0.5807224242022168
1653	CCTTCCAGAAGTGGGCATCTGTGGTGGTGC	H2-K	72.63	268.0	0.44378698200000005	0	nodrug	0.5486747219797459
1654	ATCTCCAGACAAGAGCTACATTTATGGAAG	NF1	41.53	1179.0	0.008152174	0	PLX_2uM	0.21697832194241576
1655	TGACCCAGAGCACAAGGAGGCTGAAGGCAG	MED12	29.81	649.0	0.9523809520000001	1	AZD_200nM	0.6010121284656231
1656	TGACCCAGAGCACAAGGAGGCTGAAGGCAG	MED12	29.81	649.0	0.95021645	1	PLX_2uM	0.6010121284656231
1657	GAGACCAGAGCAGGAGTGGTTCATGGGGCC	CD33	71.15	259.0	0.192640693	0	nodrug	0.4572714051706623
1658	AGCGCCAGAGTGACAGGGACCTTATGGGCA	CD13	69.6	673.0	0.238461538	0	nodrug	0.3074517213524271
1659	TGTACCAGATCCCACAGACTGATATGGCTG	NF1	8.49	241.0	0.460597826	0	PLX_2uM	0.40588236728887506
1660	AGGACCAGATGGCACAGGTCTTTGAGGGGT	MED12	43.55	948.0	0.045454545	0	AZD_200nM	0.4131212872111747
1661	AGGACCAGATGGCACAGGTCTTTGAGGGGT	MED12	43.55	948.0	0.053030303	0	PLX_2uM	0.4131212872111747
1662	ATGACCAGCAAAGAAGTTAAGGATGGGGCC	CD13	33.61	325.0	0.717582418	0	nodrug	0.5844460914531204
1663	GCTTCCAGCACCTTCTGCTCCATCAGGCGC	NF2	71.6	426.0	0.251121076	0	PLX_2uM	0.4240360941246794
1664	AGGGCCAGCACGAGCTGCTCCTTCTGGAAC	CCDC101	78.5	230.0	0.073825503	0	AZD_200nM	0.24441406096978427
1665	AACACCAGCAGCAACAGCAGCAACAGGCGG	MED12	97.47	2122.0	0.015151515	0	AZD_200nM	0.06182158147754244
1666	AACACCAGCAGCAACAGCAGCAACAGGCGG	MED12	97.47	2122.0	0.0995671	0	PLX_2uM	0.06182158147754244
1667	TGAGCCAGCAGCCCTTCTTATCGCTGGTGC	MED12	68.12	1483.0	0.122294372	0	AZD_200nM	0.42741392719638316
1668	TGAGCCAGCAGCCCTTCTTATCGCTGGTGC	MED12	68.12	1483.0	0.08658008699999999	0	PLX_2uM	0.42741392719638316
1669	GTCACCAGCCAGAAGTTATCCTTCTGGTTC	MED12	4.55	99.0	0.34199134200000003	0	AZD_200nM	0.41512366083243557
1670	GTCACCAGCCAGAAGTTATCCTTCTGGTTC	MED12	4.55	99.0	0.480519481	0	PLX_2uM	0.41512366083243557
1671	GCAGCCAGCCAGCTACCAAGACAGAGGTGA	MED12	82.64	1799.0	0.676406926	0	AZD_200nM	0.6303938443027056
1672	GCAGCCAGCCAGCTACCAAGACAGAGGTGA	MED12	82.64	1799.0	0.557359307	0	PLX_2uM	0.6303938443027056
1673	AATGCCAGCCCATCAGTTTCTGTGGGGTCA	CD43	12.91	51.0	0.811594203	1	nodrug	0.7261998931581234
1674	GTAGCCAGCGAGTCATGAAAAGATAGGTCA	MED12	51.58	1123.0	0.938311688	1	AZD_200nM	0.597023593755294
1675	GTAGCCAGCGAGTCATGAAAAGATAGGTCA	MED12	51.58	1123.0	0.924242424	1	PLX_2uM	0.597023593755294
1676	AGCACCAGCGATAAGAAGGGCTGCTGGCTC	MED12	67.94	1479.0	0.47943722899999996	0	AZD_200nM	0.504010120552205
1677	AGCACCAGCGATAAGAAGGGCTGCTGGCTC	MED12	67.94	1479.0	0.43181818200000005	0	PLX_2uM	0.504010120552205
1678	AAACCCAGCGCTGGCCCGGGGGCCTGGGGC	CD15	54.15	287.0	0.014652015	0	nodrug	0.13895094959604687
1679	ACCGCCAGCGCTTGGCAGCCAAGGAGGGGC	TADA1	98.21	329.0	0.009174311999999999	0	AZD_200nM	0.27776149509288317
1680	TCCACCAGCTGGTAGCCGTGGTAGCGGCGG	TADA2B	11.43	48.0	0.357894737	0	AZD_200nM	0.5588473540375443
1681	TCCCCCAGGAGACACACCCTGAGCCGGCGC	CCDC101	70.31	206.0	0.469798658	0	AZD_200nM	0.487734543413843
1682	CTCCCCAGGAGATGAACTCCCTCTTGGAGA	MED12	63.3	1378.0	0.316017316	0	AZD_200nM	0.4920037592574437
1683	CTCCCCAGGAGATGAACTCCCTCTTGGAGA	MED12	63.3	1378.0	0.327922078	0	PLX_2uM	0.4920037592574437
1684	TAATCCAGGATATATCCAAAGACGTGGTTG	NF1	10.11	287.0	0.588315217	0	PLX_2uM	0.7118159471682672
1685	CACACCAGGATCCACCCCAACCTGCGGTCC	CD13	81.9	792.0	0.934065934	1	nodrug	0.6743253870103373
1686	GTCTCCAGGATTCAGAGGCACAATAGGAGC	MED12	36.61	797.0	0.213203463	0	AZD_200nM	0.3744899080412516
1687	GTCTCCAGGATTCAGAGGCACAATAGGAGC	MED12	36.61	797.0	0.16558441599999998	0	PLX_2uM	0.3744899080412516
1688	AGCCCCAGGCCCCCGGGCCAGCGCTGGGTT	CD15	54.91	291.0	0.076923077	0	nodrug	0.23285486725701762
1689	GACCCCAGGCCCTTGCCAATTCGATGGGAG	CD5	47.77	236.0	0.30543933100000004	0	nodrug	0.5181209787174268
1690	GCATCCAGGCGCACACTGCCGAGGAGGTGG	CD15	49.25	261.0	0.641025641	0	nodrug	0.6120244129909297
1691	GTCACCAGGCTTCCCGATCCACAGGGGCAG	CCDC101	45.39	133.0	0.8255033559999999	1	AZD_200nM	0.7630917604103521
1692	CCGGCCAGGGCCTGCAGGAAGTGGGGGCTG	MED12	9.74	212.0	0.452380952	0	AZD_200nM	0.5822477817371954
1693	CCGGCCAGGGCCTGCAGGAAGTGGGGGCTG	MED12	9.74	212.0	0.632034632	0	PLX_2uM	0.5822477817371954
1694	GATCCCAGGGCGAGATCTTCTGTTTGGTGG	MED12	77.31	1683.0	0.27597402600000004	0	AZD_200nM	0.3606186275992364
1695	GATCCCAGGGCGAGATCTTCTGTTTGGTGG	MED12	77.31	1683.0	0.261904762	0	PLX_2uM	0.3606186275992364
1696	GGAGCCAGGGCGGCCGCCAACAGCAGGAGC	H2-K	2.44	9.0	0.627218935	0	nodrug	0.5050944342526672
1697	TGCCCCAGGGCGGGGGCCAGTCGGGGGGCC	CD15	46.79	248.0	0.41758241799999996	0	nodrug	0.31869216550658835
1698	CACTCCAGGGTAAGTTGGTCGGGTGGGCAG	MED12	85.94	1871.0	0.534632035	0	AZD_200nM	0.5070582991803085
1699	CACTCCAGGGTAAGTTGGTCGGGTGGGCAG	MED12	85.94	1871.0	0.45670995700000006	0	PLX_2uM	0.5070582991803085
1700	GGCTCCAGGTAATAGGCGCGGGGCCGGGGC	MED12	79.65	1734.0	0.556277056	0	AZD_200nM	0.32277429485911946
1701	GGCTCCAGGTAATAGGCGCGGGGCCGGGGC	MED12	79.65	1734.0	0.484848485	0	PLX_2uM	0.32277429485911946
1702	AGACCCAGTAGCTGTGGTGACAGGGGGACC	CD43	47.34	187.0	0.565217391	0	nodrug	0.6859550412509791
1703	AGCGCCAGTCAGACAGTCTGGAAAAGGTTC	MED12	75.01	1633.0	0.428571429	0	AZD_200nM	0.45547140264289304
1704	AGCGCCAGTCAGACAGTCTGGAAAAGGTTC	MED12	75.01	1633.0	0.380952381	0	PLX_2uM	0.45547140264289304
1705	TGTGCCAGTCTTGCAGGTGTCCCGAGGGCA	THY1	10.49	17.0	0.838709677	1	nodrug	0.5919690252791368
1706	TTATCCAGTGGTTTAATAGTAAACTGGAAG	NF2	45.55	271.0	0.17937219699999998	0	PLX_2uM	0.4204578367565749
1707	AGTACCAGTGTACCACATGGAAAGGGGAAG	CD45	84.25	952.0	0.837545126	1	nodrug	0.6255342511274555
1708	TCTTCCAGTTTACTATTAAACCACTGGATA	NF2	46.22	275.0	0.38116591899999996	0	PLX_2uM	0.5526822571337173
1709	ACTTCCATAAATGTAGCTCTTGTCTGGAGA	NF1	41.39	1175.0	0.498641304	0	PLX_2uM	0.45105885872121076
1710	CACACCATAAGGGCCGCTCCGACCCGGGCC	MED12	83.05	1808.0	0.451298701	0	AZD_200nM	0.42433211816075417
1711	CACACCATAAGGGCCGCTCCGACCCGGGCC	MED12	83.05	1808.0	0.350649351	0	PLX_2uM	0.42433211816075417
1712	GTGCCCATAAGGTCCCTGTCACTCTGGCGC	CD13	70.01	677.0	0.7769230770000001	0	nodrug	0.48712335795216827
1713	CCAGCCATATCAGTCTGTGGGATCTGGTAC	NF1	8.35	237.0	0.417119565	0	PLX_2uM	0.48589242180775877
1714	TGCTCCATCACCTCTTGGGGAGTCCGGGAA	TADA2B	24.29	102.0	0.578947368	0	AZD_200nM	0.3838143313909421
1715	TCTCCCATCAGAGTGAAGACCCACAGGAGG	CD33	78.3	285.0	0.636363636	0	nodrug	0.576864963517829
1716	CAGCCCATCAGTTTCTGTGGGGTCAGGGAC	CD43	13.16	52.0	0.144927536	0	nodrug	0.34127685876153774
1717	CCTCCCATCGAATTGGCAAGGGCCTGGGGT	CD5	46.96	232.0	0.09623431	0	nodrug	0.3552943111428407
1718	GCAGCCATGAGTGCAACCAGCGGTTGGTCG	MED12	34.59	753.0	0.9675324679999999	1	AZD_200nM	0.6618666856110569
1719	GCAGCCATGAGTGCAACCAGCGGTTGGTCG	MED12	34.59	753.0	0.980519481	1	PLX_2uM	0.6618666856110569
1720	CAATCCATGGAATTGTGCAGAGTGTGGTGT	NF1	94.65	2687.0	0.8097826090000001	1	PLX_2uM	0.4183437935309394
1721	ACTTCCATGTACCGGGGCTCCCCGAGGCCG	H2-K	10.57	39.0	0.852071006	1	nodrug	0.6571443826632192
1722	GGACCCATTCCACCGGCCTGTGCGCGGCCA	NF1	0.14	4.0	0.706521739	0	PLX_2uM	0.5768478736479207
1723	AGGACCATTCGAAAAATGCCCAGCAGGCCT	CD5	14.98	74.0	0.347280335	0	nodrug	0.5107530334426433
1724	GTAGCCATTTAAAGAACAAATTTGGGGAGC	MED12	45.43	989.0	0.7164502159999999	0	AZD_200nM	0.6243550687523345
1725	GTAGCCATTTAAAGAACAAATTTGGGGAGC	MED12	45.43	989.0	0.777056277	0	PLX_2uM	0.6243550687523345
1726	TCTACCCAAGATCCCATAACCACCAGGTCA	CD43	60.51	239.0	0.8768115940000001	1	nodrug	0.6375094498707052
1727	TAGGCCCACACCTGAGCCGTGACCTGGTGT	MED12	38.77	844.0	0.94047619	1	AZD_200nM	0.5971378323342104
1728	TAGGCCCACACCTGAGCCGTGACCTGGTGT	MED12	38.77	844.0	0.882034632	1	PLX_2uM	0.5971378323342104
1729	CCTTCCCACAGCGGCCAAGATTGCCGGTCT	CCDC101	34.13	100.0	0.080536913	0	AZD_200nM	0.39501545363516527
1730	AAGACCCACAGGAGGAAAGCAGCCAGGACA	CD33	79.67	290.0	0.11038961	0	nodrug	0.5213420087555957
1731	CCTCCCCACCATCACCATGGCCAAGGGCTT	CD13	0.21	2.0	0.773626374	0	nodrug	0.6093735278158046
1732	GCTGCCCACCCGACCAACTTACCCTGGAGT	MED12	86.08	1874.0	0.380952381	0	AZD_200nM	0.5172927831731347
1733	GCTGCCCACCCGACCAACTTACCCTGGAGT	MED12	86.08	1874.0	0.39177489200000004	0	PLX_2uM	0.5172927831731347
1734	CACGCCCACCGGTCGCGACGGGGTTGGCGA	CD15	34.91	185.0	0.46153846200000004	0	nodrug	0.5227018531093016
1735	CGCGCCCACGTGGACATGTACGTGCGGAAG	TADA2B	50.0	210.0	0.9736842109999999	1	AZD_200nM	0.7300503445188081
1736	GCTTCCCACTCGAGGCCAGCTTGAAGGGAG	TADA1	45.07	151.0	0.073394495	0	AZD_200nM	0.3909326069763945
1737	CGATCCCAGAGTGCCATTAACACTTGGTTC	MED12	5.28	115.0	0.24783549800000002	0	AZD_200nM	0.4913345286924964
1738	CGATCCCAGAGTGCCATTAACACTTGGTTC	MED12	5.28	115.0	0.310606061	0	PLX_2uM	0.4913345286924964
1739	TCCTCCCAGATTGCAGCTGGTGCCAGGACA	CD5	32.79	162.0	0.029288703	0	nodrug	0.42772624114776975
1740	CACACCCAGCAATACGAATGGCACCGGTAA	NF1	16.31	463.0	0.4375	0	PLX_2uM	0.6376096445519774
1741	TGGACCCAGCATGCCCCAAAGAGGAGGAGA	CD43	2.03	8.0	0.855072464	1	nodrug	0.5857380275014278
1742	AGGCCCCAGCCGCGGCCGCTTCAGGGGCCG	MED12	0.69	15.0	0.545454545	0	AZD_200nM	0.47530886362865266
1743	AGGCCCCAGCCGCGGCCGCTTCAGGGGCCG	MED12	0.69	15.0	0.642857143	0	PLX_2uM	0.47530886362865266
1744	CAGGCCCAGGACACAGAGCAGGTCAGGTTT	CD33	44.51	162.0	0.454545455	0	nodrug	0.42668349213751716
1745	GGCCCCCAGGCTCACCGGGTACGTGGGCTT	NF2	80.84	481.0	0.668161435	0	PLX_2uM	0.5382084128789216
1746	CCACCCCAGGGCGCCTCAGTCCTCAGGATG	CD13	50.05	484.0	0.12857142900000001	0	nodrug	0.45698582683073913
1747	ATGCCCCAGGGCGGGGGCCAGTCGGGGGGC	CD15	46.79	248.0	0.622710623	0	nodrug	0.25951896928900275
1748	GAGACCCAGTAGCTGTGGTGACAGGGGGAC	CD43	47.34	187.0	0.7753623190000001	0	nodrug	0.6293812932757088
1749	AAGACCCAGTGTTGAGTAGTGCCCAGGCGC	MED12	60.4	1315.0	0.04004329	0	AZD_200nM	0.5748697961064307
1750	AAGACCCAGTGTTGAGTAGTGCCCAGGCGC	MED12	60.4	1315.0	0.057359307000000005	0	PLX_2uM	0.5748697961064307
1751	CAATCCCAGTTTCTTTGACCCCCTTGGAAA	CD43	19.24	76.0	0.152173913	0	nodrug	0.4284024038534267
1752	TGTGCCCATCACATCCATCAGAGATGGCAG	CD13	61.22	592.0	0.8780219779999999	1	nodrug	0.5879685495996929
1753	CGTCCCCATCCACGGCCTTCACCCGGGCAG	CCDC101	56.66	166.0	0.657718121	0	AZD_200nM	0.5983899833392925
1754	GGGCCCCATCCTTAACTTCTTTGCTGGTCA	CD13	33.92	328.0	0.123076923	0	nodrug	0.2335187566974653
1755	CCTCCCCATTCAACTGCCAGGTCAGGGTGA	H2-K	64.23	237.0	0.33727810700000005	0	nodrug	0.520505128995253
1756	TCTTCCCATTGACATAGGCAAGTAGGGACA	CD45	25.31	286.0	0.613718412	0	nodrug	0.537432516699283
1757	AGCCCCCCAAAACTGACAAACCGGGGGCTG	MED12	81.4	1772.0	0.511904762	0	AZD_200nM	0.6016142046703403
1758	AGCCCCCCAAAACTGACAAACCGGGGGCTG	MED12	81.4	1772.0	0.39718614700000004	0	PLX_2uM	0.6016142046703403
1759	AGCTCCCCAAATTTGTTCTTTAAATGGCTA	MED12	45.25	985.0	0.038961038999999996	0	AZD_200nM	0.13012202718715915
1760	AGCTCCCCAAATTTGTTCTTTAAATGGCTA	MED12	45.25	985.0	0.014069264	0	PLX_2uM	0.13012202718715915
1761	ATCTCCCCAACTTCCCCACCTGAATGGCAA	MED12	41.11	895.0	0.24242424199999998	0	AZD_200nM	0.5077797325261714
1762	ATCTCCCCAACTTCCCCACCTGAATGGCAA	MED12	41.11	895.0	0.215367965	0	PLX_2uM	0.5077797325261714
1763	CCAGCCCCAAGAGAGTGGTGCTGACGGCTT	MED12	78.0	1698.0	0.560606061	0	AZD_200nM	0.4769373220053252
1764	CCAGCCCCAAGAGAGTGGTGCTGACGGCTT	MED12	78.0	1698.0	0.511904762	0	PLX_2uM	0.4769373220053252
1765	GGTGCCCCACACAGACGTGCATAAGGGCAT	MED12	48.64	1059.0	0.788961039	0	AZD_200nM	0.5579523002383504
1766	GGTGCCCCACACAGACGTGCATAAGGGCAT	MED12	48.64	1059.0	0.726190476	0	PLX_2uM	0.5579523002383504
1767	CTGACCCCACAGAAACTGATGGGCTGGCAT	CD43	11.9	47.0	0.101449275	0	nodrug	0.4866736872952483
1768	GTTTCCCCACAGGGGCCCTGGCTATGGATC	CD33	4.4	16.0	0.305194805	0	nodrug	0.38868141417534247
1769	AGGGCCCCAGAGACCCAGTAGCTGTGGTGA	CD43	48.1	190.0	0.586956522	0	nodrug	0.6395578661059262
1770	GAGGCCCCAGCCGCGGCCGCTTCAGGGGCC	MED12	0.69	15.0	0.300865801	0	AZD_200nM	0.2752303848478776
1771	GAGGCCCCAGCCGCGGCCGCTTCAGGGGCC	MED12	0.69	15.0	0.269480519	0	PLX_2uM	0.2752303848478776
1772	TGGGCCCCAGGACTACTCACTCCTCGGTGC	CD33	53.3	194.0	0.792207792	0	nodrug	0.5560495280884932
1773	GGATCCCCAGGATGCCCAGGGACTTGGAAA	CD13	1.03	10.0	0.125274725	0	nodrug	0.3842492112083785
1774	CCGCCCCCAGGCCCACACTCGCTGAGGTAT	H2-K	7.05	26.0	0.49704142	0	nodrug	0.6422064799357582
1775	TGGCCCCCAGGCTCACCGGGTACGTGGGCT	NF2	80.84	481.0	0.66367713	0	PLX_2uM	0.46135004673598495
1776	GATGCCCCAGGGCGGGGGCCAGTCGGGGGG	CD15	46.98	249.0	0.047619048	0	nodrug	0.2047829792248319
1777	TACACCCCATACCTATCGGGATCATGGTGC	MED12	49.01	1067.0	0.47402597399999996	0	AZD_200nM	0.49072825776425594
1778	TACACCCCATACCTATCGGGATCATGGTGC	MED12	49.01	1067.0	0.505411255	0	PLX_2uM	0.49072825776425594
1779	TCGTCCCCATCCACGGCCTTCACCCGGGCA	CCDC101	56.66	166.0	0.20134228199999998	0	AZD_200nM	0.373197052058516
1780	TCCTCCCCATTCAACTGCCAGGTCAGGGTG	H2-K	64.23	237.0	0.195266272	0	nodrug	0.3127115392139455
1781	GAGCCCCCCAAAACTGACAAACCGGGGGCT	MED12	81.4	1772.0	0.48917748899999997	0	AZD_200nM	0.5691834166322539
1782	GAGCCCCCCAAAACTGACAAACCGGGGGCT	MED12	81.4	1772.0	0.47619047600000003	0	PLX_2uM	0.5691834166322539
1783	CTGACCCCCAAGATCTCCTTCCCGTGGAAT	NF2	43.19	257.0	0.7264573990000001	0	PLX_2uM	0.6392410627484317
1784	GCTGCCCCCACCTCCCTGGGCCCCAGGACT	CD33	51.92	189.0	0.19913419899999998	0	nodrug	0.42175380777669186
1785	ACAGCCCCCACTTCCTGCAGGCCCTGGCCG	MED12	9.6	209.0	0.411255411	0	AZD_200nM	0.46388018109918083
1786	ACAGCCCCCACTTCCTGCAGGCCCTGGCCG	MED12	9.6	209.0	0.359307359	0	PLX_2uM	0.46388018109918083
1787	AGAGCCCCCCAAAACTGACAAACCGGGGGC	MED12	81.35	1771.0	0.544372294	0	AZD_200nM	0.4763248520672347
1788	AGAGCCCCCCAAAACTGACAAACCGGGGGC	MED12	81.35	1771.0	0.5	0	PLX_2uM	0.4763248520672347
1789	GGGCCCCCCGACTGGCCCCCGCCCTGGGGC	CD15	47.55	252.0	0.31868131899999996	0	nodrug	0.24517353217192167
1790	TTCCCCCCCTAGACAAATAGTAGAAGGAAC	CD28	82.57	180.0	0.243243243	0	nodrug	0.38656496018641306
1791	TGGTCCCCCTGTCACCACAGCTACTGGGTC	CD43	48.1	190.0	0.202898551	0	nodrug	0.28255547639925194
1792	GGCCCCCCGACTGGCCCCCGCCCTGGGGCA	CD15	47.55	252.0	0.164835165	0	nodrug	0.222357517173368
1793	CCAACCCCGCCTCGGCCACCACCTTGGACC	CD13	6.62	64.0	0.131868132	0	nodrug	0.48478102652663274
1794	GCCACCCCGGAAGACCATGCGCAGAGGGGT	CCDC101	39.25	115.0	0.496644295	0	AZD_200nM	0.596059019964035
1795	AGGCCCCCGGGCCAGCGCTGGGTTTGGATG	CD15	55.28	293.0	0.813186813	1	nodrug	0.3722307389497474
1796	CCTCCCCCGGGTTCCTCTGTGCCCAGGAGA	CD5	69.23	342.0	0.552301255	0	nodrug	0.45631966000210233
1797	TTCTCCCCTACTATGCCCTGTGAGGGGAAG	MED12	31.88	694.0	0.8170995670000001	1	AZD_200nM	0.6144851943595946
1798	TTCTCCCCTACTATGCCCTGTGAGGGGAAG	MED12	31.88	694.0	0.796536797	0	PLX_2uM	0.6144851943595946
1799	CCTTCCCCTCACAGGGCATAGTAGGGGAGA	MED12	31.69	690.0	0.405844156	0	AZD_200nM	0.6400531929095383
1800	CCTTCCCCTCACAGGGCATAGTAGGGGAGA	MED12	31.69	690.0	0.375541126	0	PLX_2uM	0.6400531929095383
1801	CTGACCCCTCCCCCCACAGTGGTTCGGGAA	CD13	40.74	394.0	0.07032967	0	nodrug	0.34917620078927336
1802	AGCACCCCTCTGCGCATGGTCTTCCGGGGT	CCDC101	38.23	112.0	0.040268456	0	AZD_200nM	0.12487210840148177
1803	CCGGCCCCTGAAGCGGCCGCGGCTGGGGCC	MED12	0.83	18.0	0.41666666700000005	0	AZD_200nM	0.31657402266483353
1804	CCGGCCCCTGAAGCGGCCGCGGCTGGGGCC	MED12	0.83	18.0	0.296536797	0	PLX_2uM	0.31657402266483353
1805	GTCACCCCTGGGGCAGGTACAGCGAGGTTA	CD13	77.77	752.0	0.7010989009999999	0	nodrug	0.6689707114654679
1806	GGTCCCCCTGTCACCACAGCTACTGGGTCT	CD43	48.35	191.0	0.246376812	0	nodrug	0.49014610592979474
1807	CCTGCCCCTGTGGATCGGGAAGCCTGGTGA	CCDC101	46.42	136.0	0.006711409000000001	0	AZD_200nM	0.3892235932438328
1808	TCTTCCCCTTTCCATGTGGTACACTGGTAC	CD45	83.89	948.0	0.342960289	0	nodrug	0.4431867196283586
1809	CAAGCCCCTTTCGATTCTAGGTGGTGGCTT	NF1	50.48	1433.0	0.361413043	0	PLX_2uM	0.513705599561416
1810	GCCCCCCGACTGGCCCCCGCCCTGGGGCAT	CD15	47.55	252.0	0.604395604	0	nodrug	0.5355753783920959
1811	GCTCCCCGAGGCCGGGCCGGGACACGGCGG	H2-K	9.21	34.0	0.42011834299999995	0	nodrug	0.3283231751636781
1812	ATGTCCCGCACGGTGGTGGGGAGTTGGATG	CD13	55.02	532.0	0.736263736	0	nodrug	0.5004814643948243
1813	TGGCCCCGCCACTGTCCAGGAAACAGGGGC	CD15	66.6	353.0	0.761904762	0	nodrug	0.35109432642850563
1814	TGGGCCCGCCTAGTACCTACCTGTAGGATA	MED12	16.86	367.0	0.996753247	1	AZD_200nM	0.7354849248883415
1815	TGGGCCCGCCTAGTACCTACCTGTAGGATA	MED12	16.86	367.0	0.992424242	1	PLX_2uM	0.7354849248883415
1816	GGTACCCGCGGAGGAGTCGCCCGTCGGACC	H2-K	34.69	128.0	0.674556213	0	nodrug	0.6195969972131893
1817	TCCACCCGCTCACTCTCACTTCGAGGGTCC	MED12	26.87	585.0	0.571428571	0	AZD_200nM	0.5433967976959208
1818	TCCACCCGCTCACTCTCACTTCGAGGGTCC	MED12	26.87	585.0	0.593073593	0	PLX_2uM	0.5433967976959208
1819	CCCACCCGCTGTCCACACCCGCCTCGGAGA	CD13	47.47	459.0	0.46043956	0	nodrug	0.5141283395513307
1820	CCACCCCGGAAGACCATGCGCAGAGGGGTG	CCDC101	39.59	116.0	0.342281879	0	AZD_200nM	0.47622958906678753
1821	GATGCCCGGAATTCCTTTGCGAGAAGGTTG	CD28	22.02	48.0	0.18918918899999998	0	nodrug	0.5517908170648044
1822	GCTGCCCGGGTGAAGGCCGTGGATGGGGAC	CCDC101	58.02	170.0	0.24832214800000002	0	AZD_200nM	0.3970177808811571
1823	CCCACCCGTGAACCACAGGGGATGCGGAAC	MED12	56.59	1232.0	0.308441558	0	AZD_200nM	0.5167444564944953
1824	CCCACCCGTGAACCACAGGGGATGCGGAAC	MED12	56.59	1232.0	0.322510823	0	PLX_2uM	0.5167444564944953
1825	CACACCCTACCCACTCCCAAAATCAGGTGA	CD13	35.16	340.0	0.124175824	0	nodrug	0.4298175104449257
1826	GTGTCCCTACTTGCCTATGTCAATGGGAAG	CD45	25.66	290.0	0.400722022	0	nodrug	0.4971286552003441
1827	TTTACCCTCAGGACCCCAAACAGAAGGAGG	MED12	1.42	31.0	0.566017316	0	AZD_200nM	0.5973100637053127
1828	TTTACCCTCAGGACCCCAAACAGAAGGAGG	MED12	1.42	31.0	0.57034632	0	PLX_2uM	0.5973100637053127
1829	TGACCCCTCCCCCCACAGTGGTTCGGGAAC	CD13	40.85	395.0	0.076923077	0	nodrug	0.3039165280163481
1830	CGGACCCTCGAAGTGAGAGTGAGCGGGTGG	MED12	27.06	589.0	0.651515152	0	AZD_200nM	0.5815393406854072
1831	CGGACCCTCGAAGTGAGAGTGAGCGGGTGG	MED12	27.06	589.0	0.792207792	0	PLX_2uM	0.5815393406854072
1832	GCACCCCTCTGCGCATGGTCTTCCGGGGTG	CCDC101	38.23	112.0	0.020134228	0	AZD_200nM	0.19318840266663834
1833	CCTCCCCTCTGGAGGCTGAATACCAGGTAG	CD45	68.5	774.0	0.328519856	0	nodrug	0.40914445845113245
1834	CGGCCCCTGAAGCGGCCGCGGCTGGGGCCT	MED12	0.87	19.0	0.415584416	0	AZD_200nM	0.38019779161552625
1835	CGGCCCCTGAAGCGGCCGCGGCTGGGGCCT	MED12	0.87	19.0	0.477272727	0	PLX_2uM	0.38019779161552625
1836	GGAACCCTGACACTGAAGCTGTTCTGGTTG	NF1	24.76	703.0	0.11005434800000001	0	PLX_2uM	0.3317182385841055
1837	ATCACCCTGACCTGGCAGTTGAATGGGGAG	H2-K	65.31	241.0	0.25443787	0	nodrug	0.3620776937935145
1838	TGCTCCCTGAGCATCGTAGACGCCAGGAGG	CD33	29.67	108.0	0.359307359	0	nodrug	0.520779469180939
1839	CGGACCCTGAGGCCTTGTTCCAGAAGGAGC	CCDC101	78.16	229.0	0.067114094	0	AZD_200nM	0.5038806202550314
1840	CACCCCCTGATGATGCTGAGCAGCAGGCTG	TADA1	76.12	255.0	0.256880734	0	AZD_200nM	0.37033218196621237
1841	CCATCCCTGCCTCAGGAGACTACGTGGCCA	CCDC101	52.56	154.0	0.483221477	0	AZD_200nM	0.667550443614273
1842	GAAGCCCTGGCGACCTCCAGCCCCAGGCCC	CD15	53.77	285.0	0.402930403	0	nodrug	0.5052936918351284
1843	CAGCCCCTGTTTCCTGGACAGTGGCGGGGC	CD15	66.04	350.0	0.8608058609999999	1	nodrug	0.510751882981066
1844	AATGCCCTTATGCACGTCTGTGTGGGGCAC	MED12	48.83	1063.0	0.925324675	1	AZD_200nM	0.6769893232508983
1845	AATGCCCTTATGCACGTCTGTGTGGGGCAC	MED12	48.83	1063.0	0.872294372	1	PLX_2uM	0.6769893232508983
1846	TTCTCCCTTCAAGCTGGCCTCGAGTGGGAA	TADA1	44.18	148.0	0.42201834899999996	0	AZD_200nM	0.47511027291096314
1847	TTTTCCCTTCAGAAAACAAGATTTTGGTAA	CD28	10.09	22.0	0.648648649	0	nodrug	0.2954174225811303
1848	TTTTCCCTTCCGGAGAGAGGCTCCAGGAGT	NF1	23.11	656.0	0.573369565	0	PLX_2uM	0.4727874181587388
1849	AATACCCTTCCTGACACTGGTCGCAGGAAG	MED12	4.18	91.0	0.689393939	0	AZD_200nM	0.5902906220119389
1850	AATACCCTTCCTGACACTGGTCGCAGGAAG	MED12	4.18	91.0	0.6504329000000001	0	PLX_2uM	0.5902906220119389
1851	GGGTCCGACGGGCGACTCCTCCGCGGGTAC	H2-K	35.77	132.0	0.75147929	0	nodrug	0.6026540930629152
1852	AGGCCCGAGCACCCTCTTACCTGTGGGCTC	CD5	31.38	155.0	0.263598326	0	nodrug	0.6195131579601532
1853	AGCACCGAGGAGTGAGTAGTCCTGGGGCCC	CD33	52.2	190.0	0.7813852809999999	0	nodrug	0.7121486128277805
1854	ATCTCCGAGGCGGGTGTGGACAGCGGGTGG	CD13	47.05	455.0	0.69010989	0	nodrug	0.45047068185978173
1855	GCTTCCGCACGTACATGTCCACGTGGGCGC	TADA2B	49.05	206.0	0.878947368	1	AZD_200nM	0.7294720177737586
1856	TGGACCGCAGGTTGGGGTGGATCCTGGTGT	CD13	81.49	788.0	0.40989011	0	nodrug	0.34526151004439776
1857	GGCCCCGCCACTGTCCAGGAAACAGGGGCT	CD15	66.6	353.0	0.897435897	1	nodrug	0.5533592647064182
1858	TTCACCGCCAGCGCTTGGCAGCCAAGGAGG	TADA1	97.91	328.0	0.018348623999999997	0	AZD_200nM	0.20810863769705112
1859	ACTGCCGCCATGAGAATAACACCAAGGATA	THY1	27.16	44.0	0.7419354840000001	0	nodrug	0.750555626785322
1860	TGGCCCGCCGCAATGGCACTGGGCCGGGCC	CD13	31.64	306.0	0.48021978	0	nodrug	0.337704644629523
1861	CGCTCCGCCTCGCGTGCTTCCTGCAGGTCC	NF2	77.14	459.0	0.5067264570000001	0	PLX_2uM	0.400222859004885
1862	ATGGCCGCGCACAGGCCGGTGGAATGGGTC	NF1	0.28	8.0	0.434782609	0	PLX_2uM	0.4128280753940737
1863	TGCCCCGCGGCGCCTTCATCCACGTGGACG	CD15	86.42	458.0	0.750915751	0	nodrug	0.5720380933974014
1864	ACCGCCGCTACCACGGCTACCAGCTGGTGG	TADA2B	12.38	52.0	0.763157895	0	AZD_200nM	0.5487982109799983
1865	CCACCCGCTCCTTGTTGCTGCTGGAGGAGG	CD13	38.88	376.0	0.16043956	0	nodrug	0.5737369839868887
1866	CCTTCCGCTGAGCCTGATCTGCCTAGGTGG	CD5	26.72	132.0	0.874476987	1	nodrug	0.5539871285808401
1867	GGTACCGCTGCAGTTCTCGGATCTTGGCCC	TADA2B	68.57	288.0	0.057894737	0	AZD_200nM	0.3562066163112189
1868	GAACCCGCTGTGTTGGTTTACCACAGGCGA	CUL3	82.94	637.0	0.33766233799999995	0	PLX_2uM	0.5565033182958029
1869	CACCCCGGAAGACCATGCGCAGAGGGGTGC	CCDC101	39.59	116.0	0.946308725	1	AZD_200nM	0.7138230162676603
1870	CTTCCCGGACTCCCCAAGAGGTGATGGAGC	TADA2B	25.24	106.0	0.563157895	0	AZD_200nM	0.5306796948526487
1871	GGGCCCGGCCCAGTGCCATTGCGGCGGGCC	CD13	32.06	310.0	0.796703297	0	nodrug	0.4837429469793308
1872	GGCCCCGGCCCCGCGCCTATTACCTGGAGC	MED12	79.83	1738.0	0.076839827	0	AZD_200nM	0.3206379921387567
1873	GGCCCCGGCCCCGCGCCTATTACCTGGAGC	MED12	79.83	1738.0	0.015151515	0	PLX_2uM	0.3206379921387567
1874	TGGACCGGCGAGTGGCTCGAGGAGAGGAGC	MED12	78.87	1717.0	0.5865800870000001	0	AZD_200nM	0.5238177659421105
1875	TGGACCGGCGAGTGGCTCGAGGAGAGGAGC	MED12	78.87	1717.0	0.681818182	0	PLX_2uM	0.5238177659421105
1876	GGCGCCGGCTCAGGGTGTGTCTCCTGGGGG	CCDC101	68.94	202.0	0.275167785	0	AZD_200nM	0.23841191116080965
1877	GGCACCGGCTGCCCCGGCCCGCCCCGGCCG	CD15	73.4	389.0	0.428571429	0	nodrug	0.35743312963350254
1878	GAGGCCGGGGACCAGGGGCTCCAAAGGCAA	MED12	28.8	627.0	0.344155844	0	AZD_200nM	0.4380745365919993
1879	GAGGCCGGGGACCAGGGGCTCCAAAGGCAA	MED12	28.8	627.0	0.369047619	0	PLX_2uM	0.4380745365919993
1880	TCGGCCGGGGCGGGCCGGGGCAGCCGGTGC	CD15	74.15	393.0	0.124542125	0	nodrug	0.2137617426307076
1881	GGGCCCGGGTCGGAGCGGCCCTTATGGTGT	MED12	83.19	1811.0	0.014069264	0	AZD_200nM	0.21861355278728298
1882	GGGCCCGGGTCGGAGCGGCCCTTATGGTGT	MED12	83.19	1811.0	0.043290043	0	PLX_2uM	0.21861355278728298
1883	CTGCCCGGGTGAAGGCCGTGGATGGGGACG	CCDC101	58.02	170.0	0.771812081	0	AZD_200nM	0.4807214421902448
1884	CTTACCGGTGCCATTCGTATTGCTGGGTGT	NF1	16.17	459.0	0.47554347799999996	0	PLX_2uM	0.5517466352412435
1885	TAGCCCGTCACATTGAGGTTCAGCAGGACC	CD13	64.32	622.0	0.413186813	0	nodrug	0.5473677461664092
1886	GAAGCCGTCAGCACCACTCTCTTGGGGCTG	MED12	78.14	1701.0	0.435064935	0	AZD_200nM	0.4741964803756509
1887	GAAGCCGTCAGCACCACTCTCTTGGGGCTG	MED12	78.14	1701.0	0.41991342	0	PLX_2uM	0.4741964803756509
1888	AAGGCCGTGGATGGGGACGAGCAGTGGATC	CCDC101	59.39	174.0	0.47651006700000004	0	AZD_200nM	0.5577971986678191
1889	ACCGCCGTGTCCCGGCCCGGCCTCGGGGAG	H2-K	10.3	38.0	0.071005917	0	nodrug	0.2422084888133539
1890	GGTACCTAAGAATGTCAGGTCTCCAGGATT	MED12	36.89	803.0	0.135281385	0	AZD_200nM	0.444231033789545
1891	GGTACCTAAGAATGTCAGGTCTCCAGGATT	MED12	36.89	803.0	0.15259740300000002	0	PLX_2uM	0.444231033789545
1892	TTTTCCTACTTGTTCAGTCCATGGTGGTTG	NF1	12.29	349.0	0.819293478	1	PLX_2uM	0.7274607168890074
1893	TTACCCTAGCCAACTTCACCACCAAGGATG	THY1	59.88	97.0	0.919354839	1	nodrug	0.7160202046243961
1894	CCCACCTAGGCAGATCAGGCTCAGCGGAAG	CD5	26.11	129.0	0.9623430959999999	1	nodrug	0.6931798993823927
1895	TGCTCCTATTGTGCCTCTGAATCCTGGAGA	MED12	36.75	800.0	0.148268398	0	AZD_200nM	0.43897973150684005
1896	TGCTCCTATTGTGCCTCTGAATCCTGGAGA	MED12	36.75	800.0	0.271645022	0	PLX_2uM	0.43897973150684005
1897	AGGACCTCAAACAGAAGCTTCCCAAGGCTT	CD45	86.28	975.0	0.628158845	0	nodrug	0.5821978419157766
1898	AATTCCTCAAACTTTGAACTGGTAAGGTTA	NF1	55.13	1565.0	0.055706522	0	PLX_2uM	0.49412119036251134
1899	TACCCCTCAAAGACCTGTGCCATCTGGTCC	MED12	43.36	944.0	0.204545455	0	AZD_200nM	0.4968166382991405
1900	TACCCCTCAAAGACCTGTGCCATCTGGTCC	MED12	43.36	944.0	0.24675324699999998	0	PLX_2uM	0.4968166382991405
1901	TGCACCTCAAGGGCTCCCTGGTGAAGGACA	CD13	17.68	171.0	0.9010989009999999	1	nodrug	0.5708954149770865
1902	TTCTCCTCACTAGACTTGACCCACAGGCCC	CD33	39.29	143.0	0.742424242	0	nodrug	0.6232040838836608
1903	ACACCCTCAGCCAGGGGCACAGGGTGGTCC	CD13	14.06	136.0	0.618681319	0	nodrug	0.7490140675790878
1904	GTGGCCTCATCGACTTTGCCATTCAGGTGG	MED12	41.07	894.0	0.083333333	0	AZD_200nM	0.16926357252565982
1905	GTGGCCTCATCGACTTTGCCATTCAGGTGG	MED12	41.07	894.0	0.04004329	0	PLX_2uM	0.16926357252565982
1906	GCGACCTCATCTCCTTCCACACGGTGGATG	CD5	66.6	329.0	0.5606694560000001	0	nodrug	0.6699092495602252
1907	TCCTCCTCCAGCAGCAACAAGGAGCGGGTG	CD13	39.3	380.0	0.48351648399999997	0	nodrug	0.586124547955499
1908	TCCACCTCCTCGGCAGTGTGCGCCTGGATG	CD15	48.49	257.0	0.267399267	0	nodrug	0.3925083711990797
1909	TTCTCCTCCTCTTTGGGGCATGCTGGGTCC	CD43	3.04	12.0	0.043478261	0	nodrug	0.38769023622961085
1910	CTGACCTCCTGCAGGTGGTCCCACAGGTTC	CD13	53.57	518.0	0.089010989	0	nodrug	0.5052770889568149
1911	ATCACCTCCTTCTGGGACGAGCCTTGGTGC	CD15	94.91	503.0	0.032967033	0	nodrug	0.3060008877756231
1912	AGCCCCTCCTTGGCTGCCAAGCGCTGGCGG	TADA1	97.01	325.0	0.036697247999999995	0	AZD_200nM	0.17160557830923998
1913	CTGCCCTCGGGACACCTGCAAGACTGGCAC	THY1	8.64	14.0	0.37096774200000004	0	nodrug	0.4561982846173513
1914	CCGGCCTCGGGGAGCCCCGGTACATGGAAG	H2-K	11.65	43.0	0.5739644970000001	0	nodrug	0.43977399117382565
1915	CCTCCCTCTACAGCCAGGTGCACCAGGTAC	MED12	69.27	1508.0	0.356060606	0	AZD_200nM	0.4700088921340835
1916	CCTCCCTCTACAGCCAGGTGCACCAGGTAC	MED12	69.27	1508.0	0.433982684	0	PLX_2uM	0.4700088921340835
1917	TGCTCCTCTCCTCGAGCCACTCGCCGGTCC	MED12	78.69	1713.0	0.640692641	0	AZD_200nM	0.4795292476185293
1918	TGCTCCTCTCCTCGAGCCACTCGCCGGTCC	MED12	78.69	1713.0	0.812770563	1	PLX_2uM	0.4795292476185293
1919	GGAGCCTCTCTCCGGAAGGGAAAAGGGAAC	NF1	23.32	662.0	0.644021739	0	PLX_2uM	0.46020426606693837
1920	CACCCCTCTGCGCATGGTCTTCCGGGGTGG	CCDC101	38.23	112.0	0.630872483	0	AZD_200nM	0.6486367393343409
1921	CTCACCTCTGTCTTGGTAGCTGGCTGGCTG	MED12	82.45	1795.0	0.621212121	0	AZD_200nM	0.4370672258749743
1922	CTCACCTCTGTCTTGGTAGCTGGCTGGCTG	MED12	82.45	1795.0	0.544372294	0	PLX_2uM	0.4370672258749743
1923	ACTGCCTCTTGAGAATGGCTTACTTGGATT	NF1	12.75	362.0	0.023097826000000002	0	PLX_2uM	0.3682695870583651
1924	ACTCCCTCTTGGAGAACATCGCCAAGGCCA	MED12	63.53	1383.0	0.922077922	1	AZD_200nM	0.6861120257299307
1925	ACTCCCTCTTGGAGAACATCGCCAAGGCCA	MED12	63.53	1383.0	0.9491341990000001	1	PLX_2uM	0.6861120257299307
1926	AAGACCTGAAAACGTGGACGGCGGCGGACA	H2-K	42.28	156.0	0.36094674600000004	0	nodrug	0.5454718381526287
1927	CCCACCTGAATGGCAAAGTCGATGAGGCCA	MED12	40.88	890.0	0.758658009	0	AZD_200nM	0.6455560481719603
1928	CCCACCTGAATGGCAAAGTCGATGAGGCCA	MED12	40.88	890.0	0.793290043	0	PLX_2uM	0.6455560481719603
1929	TGTCCCTGACCCCACAGAAACTGATGGGCT	CD43	12.41	49.0	0.543478261	0	nodrug	0.5869296444393249
1930	TCATCCTGACCCTTGTACTCCTGGTGGTGC	CD5	78.74	389.0	0.8870292890000001	1	nodrug	0.608022592105291
1931	AAAACCTGACCTGCTCTGTGTCCTGGGCCT	CD33	45.6	166.0	0.248917749	0	nodrug	0.4810144572738271
1932	TCACCCTGACCTGGCAGTTGAATGGGGAGG	H2-K	65.31	241.0	0.414201183	0	nodrug	0.6571518898349086
1933	CGGGCCTGAGCCCCGCGCCATGGCCGGGGC	NF2	0.17	1.0	0.112107623	0	PLX_2uM	0.24871173423667944
1934	CACACCTGAGCCGTGACCTGGTGTTGGTCA	MED12	38.68	842.0	0.99025974	1	AZD_200nM	0.6914274039617639
1935	CACACCTGAGCCGTGACCTGGTGTTGGTCA	MED12	38.68	842.0	0.9783549779999999	1	PLX_2uM	0.6914274039617639
1936	GCATCCTGAGGACTGAGGCGCCCTGGGGTG	CD13	49.64	480.0	0.589010989	0	nodrug	0.38488587236983723
1937	AAGGCCTGAGGTGCACAGGTGTGGTGGAAT	CD5	35.02	173.0	0.757322176	0	nodrug	0.6039784809022879
1938	AGCGCCTGATGGAGCAGAAGGTGCTGGAAG	NF2	72.27	430.0	0.69955157	0	PLX_2uM	0.4560100827518607
1939	ATATCCTGATTCATCAGGCTTTAGTGGAAT	CD45	65.04	735.0	0.064981949	0	nodrug	0.3251433408533926
1940	AGGACCTGCAGGAAGCACGCGAGGCGGAGC	NF2	77.82	463.0	0.856502242	1	PLX_2uM	0.5999836644775931
1941	AGGGCCTGCAGGAAGTGGGGGCTGTGGTTC	MED12	9.83	214.0	0.243506494	0	AZD_200nM	0.4637272314013515
1942	AGGGCCTGCAGGAAGTGGGGGCTGTGGTTC	MED12	9.83	214.0	0.294372294	0	PLX_2uM	0.4637272314013515
1943	TCCTCCTGCAGTTTCTGGATACACAGGCTC	MED12	26.46	576.0	0.885281385	1	AZD_200nM	0.6025535006693664
1944	TCCTCCTGCAGTTTCTGGATACACAGGCTC	MED12	26.46	576.0	0.807359307	1	PLX_2uM	0.6025535006693664
1945	CTTTCCTGCCTCAGGATGAACTGACGGCCT	MED12	1.65	36.0	0.538961039	0	AZD_200nM	0.5847731249596381
1946	CTTTCCTGCCTCAGGATGAACTGACGGCCT	MED12	1.65	36.0	0.494588745	0	PLX_2uM	0.5847731249596381
1947	GCTTCCTGCGACCAGTGTCAGGAAGGGTAT	MED12	4.0	87.0	0.633116883	0	AZD_200nM	0.6410930316685168
1948	GCTTCCTGCGACCAGTGTCAGGAAGGGTAT	MED12	4.0	87.0	0.594155844	0	PLX_2uM	0.6410930316685168
1949	CTACCCTGCTAGAGCCTGAGAAAAAGGCTC	MED12	80.89	1761.0	0.058441558	0	AZD_200nM	0.19574686525311624
1950	CTACCCTGCTAGAGCCTGAGAAAAAGGCTC	MED12	80.89	1761.0	0.017316017	0	PLX_2uM	0.19574686525311624
1951	GGGTCCTGCTGAACCTCAATGTGACGGGCT	CD13	64.74	626.0	0.674725275	0	nodrug	0.5451075326147226
1952	GCAGCCTGCTGCTCAGCATCATCAGGGGGT	TADA1	74.93	251.0	0.39449541299999996	0	AZD_200nM	0.48327373169478993
1953	TGCTCCTGCTGTTGGCGGCCGCCCTGGCTC	H2-K	3.52	13.0	0.384615385	0	nodrug	0.44971284428455066
1954	GTGACCTGCTTCTTCAGGTAGTTCTGGGGA	CD13	74.46	720.0	0.20879120899999998	0	nodrug	0.15198288080500938
1955	AAATCCTGCTTCTTTACAGGTTATTGGAAG	NF1	72.21	2050.0	0.254076087	0	PLX_2uM	0.14432243381028506
1956	AAGGCCTGGAAGCAGAGGGCAAAGTGGATG	CD45	62.3	704.0	0.80866426	1	nodrug	0.692304513413502
1957	TTGGCCTGGACGGCGTAAGAAGCCAGGAGC	NF2	23.87	142.0	0.757847534	0	PLX_2uM	0.5674862092565469
1958	GAATCCTGGAGACCTGACATTCTTAGGTAC	MED12	37.02	806.0	0.08008658	0	AZD_200nM	0.2847370396408851
1959	GAATCCTGGAGACCTGACATTCTTAGGTAC	MED12	37.02	806.0	0.045454545	0	PLX_2uM	0.2847370396408851
1960	TACTCCTGGAGCCTCTCTCCGGAAGGGAAA	NF1	23.21	659.0	0.274456522	0	PLX_2uM	0.635697883041743
1961	GTGTCCTGGCACCAGCTGCAATCTGGGAGG	CD5	32.19	159.0	0.322175732	0	nodrug	0.43951274010363606
1962	TCCTCCTGGCGTCTACGATGCTCAGGGAGC	CD33	28.57	104.0	0.8939393940000001	1	nodrug	0.6356165818085073
1963	CTGTCCTGGCTGCTTTCCTCCTGTGGGTCT	CD33	78.57	286.0	0.393939394	0	nodrug	0.4395273023252388
1964	TGCACCTGGCTGTAGAGGGAGGTAAGGAGT	MED12	68.95	1501.0	0.49025974	0	AZD_200nM	0.5133274131215179
1965	TGCACCTGGCTGTAGAGGGAGGTAAGGAGT	MED12	68.95	1501.0	0.510822511	0	PLX_2uM	0.5133274131215179
1966	TGCTCCTGGCTTCTTACGCCGTCCAGGCCA	NF2	24.54	146.0	0.556053812	0	PLX_2uM	0.5204292889060835
1967	CGCTCCTGGGAACACTTACTGTTCTGGTTC	CD5	86.03	425.0	0.146443515	0	nodrug	0.2774940030911688
1968	TTCTCCTGGGCACAGAGGAACCCGGGGGAG	CD5	68.42	338.0	0.564853556	0	nodrug	0.619602191103779
1969	TGCGCCTGGGCACTACTCAACACTGGGTCT	MED12	60.22	1311.0	0.05952381	0	AZD_200nM	0.5838332219214596
1970	TGCGCCTGGGCACTACTCAACACTGGGTCT	MED12	60.22	1311.0	0.088744589	0	PLX_2uM	0.5838332219214596
1971	GCATCCTGGGGATCCTCCTGGGCGTGGCAG	CD13	1.96	19.0	0.058241758	0	nodrug	0.4628924203023826
1972	TAGTCCTGGGGCCCAGGGAGGTGGGGGCAG	CD33	50.82	185.0	0.25974026	0	nodrug	0.3875767561464091
1973	GGGGCCTGGGGCTGGAGGTCGCCAGGGCTT	CD15	53.02	281.0	0.93040293	1	nodrug	0.5567879079509601
1974	GCTACCTGGTATTCAGCCTCCAGAGGGGAG	CD45	68.14	770.0	0.909747292	1	nodrug	0.560991091380998
1975	TGTACCTGGTGCACCTGGCTGTAGAGGGAG	MED12	69.09	1504.0	0.35281385299999996	0	AZD_200nM	0.45646142519660476
1976	TGTACCTGGTGCACCTGGCTGTAGAGGGAG	MED12	69.09	1504.0	0.324675325	0	PLX_2uM	0.45646142519660476
1977	GTGACCTGGTGGTTATGGGATCTTGGGTAG	CD43	59.49	235.0	0.39130434799999997	0	nodrug	0.4692155464062043
1978	TCTTCCTGTGCCTGCAGAAGGAGTTGGGGG	MED12	74.55	1623.0	0.29004329	0	AZD_200nM	0.28762445490594624
1979	TCTTCCTGTGCCTGCAGAAGGAGTTGGGGG	MED12	74.55	1623.0	0.224025974	0	PLX_2uM	0.28762445490594624
1980	TCCTCCTGTGCTGTCCTAGTGCCTTGGTTT	MED12	17.27	376.0	0.7218614720000001	0	AZD_200nM	0.5481693634932259
1981	TCCTCCTGTGCTGTCCTAGTGCCTTGGTTT	MED12	17.27	376.0	0.742424242	0	PLX_2uM	0.5481693634932259
1982	TGAACCTGTGGGACCACCTGCAGGAGGTCA	CD13	53.98	522.0	0.735164835	0	nodrug	0.6990486331501844
1983	CTCGCCTGTGGTAAACCAACACAGCGGGTT	CUL3	83.46	641.0	0.7012987009999999	0	PLX_2uM	0.6974964125203434
1984	GGAGCCTGTGTATCCAGAAACTGCAGGAGG	MED12	26.27	572.0	0.930735931	1	AZD_200nM	0.6615441851452074
1985	GGAGCCTGTGTATCCAGAAACTGCAGGAGG	MED12	26.27	572.0	0.927489177	1	PLX_2uM	0.6615441851452074
1986	GCCGCCTGTTGCTGCTGTTGCTGCTGGTGT	MED12	97.29	2118.0	0.08982684	0	AZD_200nM	0.15072056264865863
1987	GCCGCCTGTTGCTGCTGTTGCTGCTGGTGT	MED12	97.29	2118.0	0.13203463199999999	0	PLX_2uM	0.15072056264865863
1988	AGCCCCTGTTTCCTGGACAGTGGCGGGGCC	CD15	65.85	349.0	0.450549451	0	nodrug	0.3775800813865651
1989	TTTTCCTTACAGGAAGAGCGTTCGCGGAGC	CCDC101	9.9	29.0	0.429530201	0	AZD_200nM	0.5665302661824292
1990	TTAACCTTACCAGTTCAAAGTTTGAGGAAT	NF1	55.27	1569.0	0.096467391	0	PLX_2uM	0.4251594774243309
1991	CTCTCCTTACCCCATCTCAGGGTGAGGGGC	H2-K	79.13	292.0	0.171597633	0	nodrug	0.42675444887435143
1992	GACTCCTTACCTCCCTCTACAGCCAGGTGC	MED12	69.13	1505.0	0.6980519479999999	0	AZD_200nM	0.5424894644551584
1993	GACTCCTTACCTCCCTCTACAGCCAGGTGC	MED12	69.13	1505.0	0.9004329	1	PLX_2uM	0.5424894644551584
1994	TCCTCCTTAGGCTTCACCATTGGACGGGTA	MED12	20.85	454.0	0.734848485	0	AZD_200nM	0.5965529923695198
1995	TCCTCCTTAGGCTTCACCATTGGACGGGTA	MED12	20.85	454.0	0.707792208	0	PLX_2uM	0.5965529923695198
1996	TCTCCCTTCAAGCTGGCCTCGAGTGGGAAG	TADA1	44.18	148.0	0.49541284399999996	0	AZD_200nM	0.5889640530884259
1997	GGTCCCTTCAATCTTCTCCTTGGGTGGGGG	MED12	32.84	715.0	0.34956709999999996	0	AZD_200nM	0.4205511882324764
1998	GGTCCCTTCAATCTTCTCCTTGGGTGGGGG	MED12	32.84	715.0	0.33658008700000003	0	PLX_2uM	0.4205511882324764
[truncated: 3,311 more rows]
