# Supplementary material for: CRISPRpred: A flexible and efficient tool for sgRNAs on-target activity prediction in CRISPR/Cas9 systems
Source: PLoS One. 2017 Aug 2;12(8):e0181943. doi: 10.1371/journal.pone.0181943 (PMC5540555; doi:10.1371/journal.pone.0181943)
Supplement: S2 File — This file contains 9632 extracted features. (CSV) [file pone.0181943.s002.csv]

X	MeanDecreaseGini
A	4.2952844065
C	3.6010881116
G	3.9471729779
T	3.42665255
AA	2.3005363227
AC	2.6546820374
AG	2.9476551204
AT	2.5748803456
CA	2.788759784
CC	2.3964397061
CG	2.0925868089
CT	2.8661119905
GA	2.5173866913
GC	2.2827773775
GG	3.3900526902
GT	2.4614465958
TA	2.3122145155
TC	2.2814885606
TG	2.673095416
TT	2.285286113
AAA	0.9004350701
AAC	0.954275386
AAG	1.810500026
AAT	0.8511283447
ACA	1.5043546697
ACC	1.3248403749
ACG	1.164183999
ACT	1.1772479246
AGA	1.2726601104
AGC	1.7333568373
AGG	1.7767471478
AGT	1.3940656932
ATA	0.979398125
ATC	1.0027827323
ATG	2.1205488076
ATT	0.8757862049
CAA	1.6572946098
CAC	1.4675235622
CAG	1.8697843864
CAT	1.3530049329
CCA	1.8372318127
CCC	1.2630604338
CCG	1.0273906918
CCT	1.6091534756
CGA	0.8367898316
CGC	0.9291584103
CGG	1.2234715988
CGT	1.3862321478
CTA	0.9339312781
CTC	1.3641991594
CTG	1.792155998
CTT	1.5622783071
GAA	1.4885249121
GAC	1.7905116832
GAG	1.7843401637
GAT	1.5674139666
GCA	1.7549370825
GCC	1.4896284972
GCG	1.1333807817
GCT	1.7076055737
GGA	1.6134340785
GGC	1.9154953743
GGG	2.5150599754
GGT	1.642665408
GTA	1.9401851575
GTC	1.3289007076
GTG	1.5618529903
GTT	1.0665709323
TAA	0.7102003206
TAC	1.242191596
TAG	1.5858090809
TAT	0.687349604
TCA	1.4235630698
TCC	1.3821302123
TCG	1.0202390573
TCT	1.1713373561
TGA	2.4246030616
TGC	1.3368507311
TGG	2.3207642395
TGT	1.5057689512
TTA	0.7295135948
TTC	1.2915326176
TTG	1.4594348893
TTT	0.7435080984
AAAA	0.4572565335
AAAC	0.7626170582
AAAG	0.6569776168
AAAT	0.4181117166
AACA	0.6015246203
AACC	0.6654201175
AACG	0.2974407051
AACT	0.6607448146
AAGA	0.6339547818
AAGC	0.5826503702
AAGG	1.618071976
AAGT	0.6149655269
AATA	0.2808399085
AATC	0.3804228248
AATG	0.6753561541
AATT	0.3293634414
ACAA	0.5057865991
ACAC	0.5134613266
ACAG	1.0624641696
ACAT	0.6063888333
ACCA	1.0441009392
ACCC	0.5783170701
ACCG	0.3846454905
ACCT	0.7772756648
ACGA	0.6284218993
ACGC	0.1623534642
ACGG	0.6993122926
ACGT	0.7332425885
ACTA	0.1942797202
ACTC	0.6980595574
ACTG	0.8164895423
ACTT	0.3727755796
AGAA	0.6469442809
AGAC	0.5342499894
AGAG	0.650141311
AGAT	0.7927895031
AGCA	0.7447970866
AGCC	0.9542280486
AGCG	0.6665377184
AGCT	0.5559105388
AGGA	0.9452143793
AGGC	1.02453223
AGGG	0.9023386965
AGGT	0.7997301925
AGTA	0.4254584045
AGTC	0.4472714924
AGTG	0.6665467818
AGTT	0.7086529775
ATAA	0.1993413187
ATAC	0.5201290348
ATAG	0.3714780067
ATAT	0.2668270977
ATCA	0.8146096072
ATCC	0.6816157176
ATCG	0.4064725372
ATCT	0.4147134352
ATGA	1.285972038
ATGC	0.709756837
ATGG	0.75819407
ATGT	0.4260681593
ATTA	0.279455167
ATTC	0.3746528036
ATTG	0.3640194293
ATTT	0.2260544324
CAAA	0.480366123
CAAC	0.5005976098
CAAG	1.065454687
CAAT	0.7606850237
CACA	0.7225154381
CACC	0.5757599576
CACG	0.8162255115
CACT	0.5069028108
CAGA	0.9824458248
CAGC	1.1184857022
CAGG	1.2323023726
CAGT	0.7661922175
CATA	0.4887522523
CATC	0.748986968
CATG	1.0325908728
CATT	0.3178240091
CCAA	1.0690258085
CCAC	0.7834523025
CCAG	0.8588904878
CCAT	0.4309101672
CCCA	0.772679496
CCCC	0.3992161537
CCCG	0.5938437259
CCCT	0.6013767753
CCGA	0.5924033659
CCGC	0.4420698826
CCGG	0.5589652219
CCGT	0.4819100858
CCTA	0.5487513727
CCTC	0.6029906625
CCTG	0.9107905934
CCTT	0.6080790493
CGAA	0.2583827319
CGAC	0.2098180146
CGAG	0.6391713838
CGAT	0.508418032
CGCA	0.4113868129
CGCC	0.3750337844
CGCG	0.2316610764
CGCT	0.2580519121
CGGA	0.6396001135
CGGC	0.4942554876
CGGG	0.73815689
CGGT	1.0037280343
CGTA	0.5669114095
CGTC	0.4881632507
CGTG	0.6013606782
CGTT	0.2003825842
CTAA	0.3395524814
CTAC	0.553086485
CTAG	0.47642422
CTAT	0.2297966447
CTCA	0.7969252844
CTCC	0.6105258449
CTCG	0.297523506
CTCT	0.6040824172
CTGA	0.837526575
CTGC	0.8196015713
CTGG	1.1591584133
CTGT	1.0250742051
CTTA	0.3207589099
CTTC	0.6340125882
CTTG	0.5620399123
CTTT	0.3510056942
GAAA	0.5888292441
GAAC	0.5967125141
GAAG	0.942848237
GAAT	0.4104640993
GACA	0.8329649143
GACC	0.7046446309
GACG	0.4093572539
GACT	0.8062992594
GAGA	0.6053770186
GAGC	0.8158143337
GAGG	0.8818328879
GAGT	0.6162475088
GATA	1.1445217125
GATC	0.3920201153
GATG	1.1943327062
GATT	0.3780840013
GCAA	0.6197092429
GCAC	0.7452316215
GCAG	0.8834883637
GCAT	1.3024327965
GCCA	0.9218404788
GCCC	0.723136249
GCCG	0.544367218
GCCT	0.9108543212
GCGA	0.5085386113
GCGC	0.4073107116
GCGG	0.8019113266
GCGT	0.4522575534
GCTA	0.3613053102
GCTC	0.5698496624
GCTG	0.9581223925
GCTT	0.4051927381
GGAA	0.9605082386
GGAC	0.6881567002
GGAG	0.9951311607
GGAT	0.8992703339
GGCA	2.1677256486
GGCC	0.931724704
GGCG	0.6273239988
GGCT	0.9156263893
GGGA	0.9676661285
GGGC	0.9225843312
GGGG	1.4726504893
GGGT	0.8021182473
GGTA	0.7157138377
GGTC	1.2400934738
GGTG	1.0702430676
GGTT	0.5455370787
GTAA	0.4710519774
GTAC	0.9284501639
GTAG	0.9248461902
GTAT	0.5007287054
GTCA	0.7857232301
GTCC	0.7779074991
GTCG	0.3690873288
GTCT	0.593615233
GTGA	1.5972359589
GTGC	0.7036709253
GTGG	1.0172272235
GTGT	0.7216686989
GTTA	0.5067274434
GTTC	0.5373611487
GTTG	0.5770475379
GTTT	0.4843206582
TAAA	0.2923459291
TAAC	0.2957800294
TAAG	0.3443784675
TAAT	0.1536316935
TACA	0.6386799223
TACC	0.551915189
TACG	0.2877237792
TACT	0.4749923908
TAGA	0.379767768
TAGC	0.5599971829
TAGG	1.0440985324
TAGT	0.5360124536
TATA	0.3788123356
TATC	0.5109361419
TATG	0.3686852939
TATT	0.2309694071
TCAA	0.5864265424
TCAC	0.4271802339
TCAG	0.7495381817
TCAT	0.5797038629
TCCA	0.7779106072
TCCC	0.6181211759
TCCG	0.4872032677
TCCT	0.5714578881
TCGA	0.3005564286
TCGC	0.4303101883
TCGG	0.5169883083
TCGT	0.6574319844
TCTA	0.3325282177
TCTC	0.601040828
TCTG	0.6864509937
TCTT	0.4744161208
TGAA	0.7598245784
TGAC	0.7986317914
TGAG	1.3089474558
TGAT	0.6088667988
TGCA	0.820245136
TGCC	0.7180951233
TGCG	0.3247411366
TGCT	0.6331987433
TGGA	0.9641341693
TGGC	0.8793405161
TGGG	1.3083980667
TGGT	0.9899939069
TGTA	0.9039628417
TGTC	0.5066186419
TGTG	0.6224945591
TGTT	0.5181864751
TTAA	0.4042807193
TTAC	0.3809732107
TTAG	0.2315032585
TTAT	0.3117599808
TTCA	0.4552383069
TTCC	0.4366129432
TTCG	0.3708161703
TTCT	0.5731754228
TTGA	0.422321082
TTGC	0.4608171729
TTGG	1.0829043771
TTGT	0.5195438278
TTTA	0.3579455891
TTTC	0.4056416997
TTTG	0.5927671259
TTTT	0.1058384047
A_1	0.6537546701
A_2	0.7596662155
A_3	0.7013679697
A_4	0.8990802562
A_5	0.6214100748
A_6	0.708409611
A_7	1.1442652156
A_8	0.8783225508
A_9	0.7004370309
A_10	0.7456539021
A_11	0.7396797818
A_12	0.7038677522
A_13	0.869126069
A_14	1.1934452972
A_15	0.8117933454
A_16	1.1706881188
A_17	0.7000606332
A_18	0.8831322053
A_19	0.8846737717
A_20	0.7141442375
A_21	0.9221533962
A_22	0.7776113908
A_23	0.5924231558
A_24	0.8947861446
A_25	0.7677190492
A_26	0
A_27	0
A_28	0.7686258403
A_29	0.8782035949
A_30	0.8518037505
C_1	0.978477507
C_2	0.892609407
C_3	0.7190559811
C_4	0.7791634153
C_5	0.7883545977
C_6	0.8586198042
C_7	1.1500971559
C_8	0.7258621887
C_9	0.8339048626
C_10	0.810776129
C_11	0.8316288614
C_12	0.8649642135
C_13	0.7932376962
C_14	0.8476639418
C_15	0.6442756654
C_16	0.9920642848
C_17	0.8794875578
C_18	0.6491301286
C_19	0.7543899854
C_20	2.1046577159
C_21	0.9073996527
C_22	1.4436785106
C_23	0.9283420631
C_24	2.0252675259
C_25	0.7512343519
C_26	0
C_27	0
C_28	1.0146909458
C_29	0.8150438798
C_30	0.782703445
G_1	0.709924334
G_2	0.9127736582
G_3	0.7818259628
G_4	0.7501376175
G_5	0.7961469073
G_6	0.6817827715
G_7	0.703414502
G_8	0.9526052821
G_9	0.6992895375
G_10	0.7420116743
G_11	0.9391707924
G_12	0.7028878183
G_13	0.886711875
G_14	0.716464681
G_15	0.8859058413
G_16	0.7592034164
G_17	0.8228396198
G_18	1.2854164922
G_19	0.7413906131
G_20	1.3937290251
G_21	1.240784824
G_22	0.8100066144
G_23	0.8716408753
G_24	2.9326618344
G_25	0.9513734476
G_26	0
G_27	0
G_28	2.2418598757
G_29	0.8604367434
G_30	0.9578875804
T_1	0.9295875096
T_2	0.7472777635
T_3	0.6703533672
T_4	0.8276605867
T_5	0.8891406258
T_6	0.682371748
T_7	0.8495105725
T_8	0.7743648519
T_9	0.7776665176
T_10	0.7919120735
T_11	0.766772236
T_12	0.6953711345
T_13	0.6898656011
T_14	0.6299145494
T_15	0.769262282
T_16	0.7786853132
T_17	0.5581659546
T_18	0.9536711083
T_19	0.7836103235
T_20	0.685488853
T_21	0.8225641818
T_22	1.0159587624
T_23	0.985055465
T_24	0.728034371
T_25	1.1853914936
T_26	0
T_27	0
T_28	0.8985686183
T_29	0.7093975256
T_30	0.7801178575
AA_1	0.3526735878
AA_2	0.302423293
AA_3	0.4094899274
AA_4	0.2181938651
AA_5	0.2284648706
AA_6	0.314250695
AA_7	0.4504692665
AA_8	0.25079195
AA_9	0.2854553716
AA_10	0.2999782036
AA_11	0.2002650873
AA_12	0.3585164375
AA_13	0.4625459542
AA_14	0.3631110092
AA_15	0.411258548
AA_16	0.2677633091
AA_17	0.2400718811
AA_18	0.3621771387
AA_19	0.3086409231
AA_20	0.3288352931
AA_21	0.2089428106
AA_22	0.2204907474
AA_23	0.4183974082
AA_24	0.294970331
AA_25	0
AA_26	0
AA_27	0
AA_28	0.2980295911
AA_29	0.3096991518
AC_1	0.4093993399
AC_2	0.3143127722
AC_3	0.268975044
AC_4	0.3201358753
AC_5	0.312697528
AC_6	0.3774570031
AC_7	0.4343352804
AC_8	0.7028901347
AC_9	0.3651605617
AC_10	0.3942804991
AC_11	0.3316824219
AC_12	0.2957280286
AC_13	0.3672971667
AC_14	0.3797493396
AC_15	0.3018356304
AC_16	0.5365620048
AC_17	0.3679730811
AC_18	0.2788360906
AC_19	0.7484398237
AC_20	0.3793930696
AC_21	1.0583480623
AC_22	0.6954391045
AC_23	0.2687789527
AC_24	0.5738538925
AC_25	0
AC_26	0
AC_27	0
AC_28	0.4176827285
AC_29	0.4189517863
AG_1	0.4276418374
AG_2	0.394523064
AG_3	0.4261431045
AG_4	0.3862106891
AG_5	0.4429902397
AG_6	0.5098946082
AG_7	0.576456851
AG_8	0.3888430811
AG_9	0.3362586458
AG_10	0.3142406466
AG_11	0.4525404512
AG_12	0.5519938918
AG_13	0.5408985293
AG_14	0.472372817
AG_15	0.6852035596
AG_16	0.7239806252
AG_17	0.44408662
AG_18	0.4345999348
AG_19	0.4398756587
AG_20	0.4179414522
AG_21	0.5102614284
AG_22	0.3605534135
AG_23	0.41443392
AG_24	0.4703340677
AG_25	0.7753335516
AG_26	0
AG_27	0
AG_28	0.4953839746
AG_29	0.5057151657
AT_1	0.274517743
AT_2	0.2776286209
AT_3	0.3459642973
AT_4	0.256795203
AT_5	0.3387106578
AT_6	0.389289354
AT_7	0.2869453754
AT_8	0.2942692955
AT_9	0.2949349616
AT_10	0.4129848418
AT_11	0.4408210128
AT_12	0.3156516612
AT_13	0.2979418643
AT_14	0.3357921761
AT_15	0.419374751
AT_16	0.3619525444
AT_17	0.3528200052
AT_18	0.4553485297
AT_19	0.2554295118
AT_20	0.2908147554
AT_21	0.2970660816
AT_22	0.1631900288
AT_23	0.1639211539
AT_24	0.4038815671
AT_25	0
AT_26	0
AT_27	0
AT_28	0.4183227535
AT_29	0.3174363216
CA_1	0.5061979029
CA_2	0.3594085062
CA_3	0.4788459977
CA_4	0.3487415252
CA_5	0.3324567978
CA_6	0.8235562516
CA_7	0.3867039303
CA_8	0.5873191857
CA_9	0.556285185
CA_10	0.4120424751
CA_11	0.4786321984
CA_12	0.4311276791
CA_13	0.4401632199
CA_14	0.43774841
CA_15	0.451037661
CA_16	0.3078650861
CA_17	0.4000522065
CA_18	0.5339963898
CA_19	0.3634642753
CA_20	1.0182865491
CA_21	0.4280655443
CA_22	0.6922071743
CA_23	1.0730099844
CA_24	0.4644819149
CA_25	0
CA_26	0
CA_27	0
CA_28	0.5626554392
CA_29	0.4995571459
CC_1	0.3387028378
CC_2	0.3414698087
CC_3	0.3301655692
CC_4	0.30443048
CC_5	0.3470376753
CC_6	0.2850690436
CC_7	0.353181352
CC_8	0.3397688726
CC_9	0.3505360377
CC_10	0.3253421693
CC_11	0.4100863938
CC_12	0.3955992342
CC_13	0.3268675385
CC_14	0.3545961738
CC_15	0.4154416215
CC_16	0.3562797666
CC_17	0.3684202771
CC_18	0.1894680789
CC_19	0.2434829817
CC_20	1.8306709441
CC_21	0.4883192113
CC_22	0.7889981811
CC_23	0.3382964425
CC_24	0.1620301287
CC_25	0
CC_26	0
CC_27	0
CC_28	0.485398945
CC_29	0.3471274657
CG_1	0.303332049
CG_2	0.2810915948
CG_3	0.3045131795
CG_4	0.229689054
CG_5	0.2110253641
CG_6	0.1753755028
CG_7	0.2548113281
CG_8	0.1754750445
CG_9	0.2529535778
CG_10	0.3776310767
CG_11	0.1255504257
CG_12	0.3112937521
CG_13	0.3061068942
CG_14	0.2550561995
CG_15	0.2186445172
CG_16	0.1468637574
CG_17	0.2008907468
CG_18	0.2386003212
CG_19	0.2205726157
CG_20	0.2854550502
CG_21	0.3431054479
CG_22	0.2437476467
CG_23	1.1332961633
CG_24	0.2488501608
CG_25	0.8633742166
CG_26	0
CG_27	0
CG_28	0.3333912514
CG_29	0.3589515221
CT_1	0.4062794712
CT_2	0.3997980188
CT_3	0.4258005291
CT_4	0.3600398712
CT_5	0.3995097342
CT_6	0.5303195919
CT_7	0.4938412008
CT_8	0.4738981505
CT_9	0.5901913752
CT_10	0.3066965808
CT_11	0.4168102378
CT_12	0.4216648896
CT_13	0.3974151709
CT_14	0.4739503836
CT_15	0.3406111288
CT_16	0.2822297815
CT_17	0.61103339
CT_18	0.3463615797
CT_19	0.316177579
CT_20	0.4311389521
CT_21	0.3598153548
CT_22	0.4054854413
CT_23	0.2746921541
CT_24	1.2132762329
CT_25	0
CT_26	0
CT_27	0
CT_28	0.4706446576
CT_29	0.3581896445
GA_1	0.4133349587
GA_2	0.3976983137
GA_3	0.4451327941
GA_4	0.3501465544
GA_5	0.3756743597
GA_6	0.3996920478
GA_7	0.3050754368
GA_8	0.4184453561
GA_9	0.3597039821
GA_10	0.3791282457
GA_11	0.3729333519
GA_12	0.4412168602
GA_13	0.6334356323
GA_14	0.7530889937
GA_15	0.6245634892
GA_16	0.2577049846
GA_17	1.1911105163
GA_18	0.3555385699
GA_19	0.3195234248
GA_20	0.4275239463
GA_21	0.2938923468
GA_22	0.4296246982
GA_23	0.4655476986
GA_24	0.4867890854
GA_25	0
GA_26	0
GA_27	0.7996457682
GA_28	0.3325890738
GA_29	0.3994140465
GC_1	0.3790635466
GC_2	0.4291365506
GC_3	0.6464518221
GC_4	0.4046536629
GC_5	0.4874804181
GC_6	0.4184567671
GC_7	0.312579398
GC_8	0.6004472117
GC_9	0.3810779164
GC_10	0.3405595796
GC_11	0.4262101158
GC_12	0.3323355978
GC_13	0.4539786975
GC_14	0.4180768827
GC_15	0.2553981698
GC_16	0.3540711629
GC_17	0.3901354974
GC_18	0.5926219828
GC_19	1.4018749232
GC_20	0.3568062863
GC_21	0.4429169698
GC_22	0.2862027671
GC_23	0.3646801757
GC_24	0.88884607
GC_25	0
GC_26	0
GC_27	0.9655880891
GC_28	0.32417388
GC_29	0.3567769311
GG_1	0.4397124431
GG_2	0.3703898106
GG_3	0.3794426314
GG_4	0.3701027512
GG_5	0.3239193135
GG_6	0.3134095019
GG_7	0.395847981
GG_8	0.4444330448
GG_9	0.3644404739
GG_10	0.4384358871
GG_11	0.5178065136
GG_12	0.2375113785
GG_13	0.3015639199
GG_14	0.2372657003
GG_15	0.3033058127
GG_16	0.3780002305
GG_17	0.399349189
GG_18	0.3854612866
GG_19	0.4128359164
GG_20	0.3754229635
GG_21	0.4167853761
GG_22	0.4695725873
GG_23	0.7883600951
GG_24	0.6125705943
GG_25	0.6791005573
GG_26	0.535202574
GG_27	0.3413143147
GG_28	0.3112954433
GG_29	0.3896836586
GT_1	0.4623496448
GT_2	0.2647948864
GT_3	0.3790191681
GT_4	0.3643573133
GT_5	0.3448394308
GT_6	0.427434693
GT_7	0.5159022861
GT_8	0.4402297264
GT_9	0.2678881068
GT_10	0.3783036858
GT_11	0.652027179
GT_12	0.4419382097
GT_13	0.3045914987
GT_14	0.3227192972
GT_15	0.4063321259
GT_16	0.3825478894
GT_17	0.4298029862
GT_18	0.2534048342
GT_19	0.3066043501
GT_20	0.2683719864
GT_21	0.3129549618
GT_22	0.1864445665
GT_23	0.5457889642
GT_24	0.5947301251
GT_25	0
GT_26	0
GT_27	0.8384020261
GT_28	0.2185175579
GT_29	0.2800243724
TA_1	0.2396753446
TA_2	0.287229786
TA_3	0.297632421
TA_4	0.4550135734
TA_5	0.3848372941
TA_6	0.5252692669
TA_7	0.3543021973
TA_8	0.1305140999
TA_9	0.1668184195
TA_10	0.2875389509
TA_11	0.2849549207
TA_12	0.747480949
TA_13	0.4711219243
TA_14	0.203424622
TA_15	0.4797225384
TA_16	0.3814944839
TA_17	0.2916443383
TA_18	0.4177192499
TA_19	0.1791601998
TA_20	0.1342939308
TA_21	0.317974986
TA_22	0.1396824026
TA_23	0.2488779569
TA_24	0.2650603856
TA_25	0
TA_26	0
TA_27	0
TA_28	0.3908101432
TA_29	0.2229818033
TC_1	0.3750287654
TC_2	0.3887417373
TC_3	0.2981516491
TC_4	0.3657510394
TC_5	0.4040623881
TC_6	0.2499866216
TC_7	0.3946274412
TC_8	0.3113889816
TC_9	0.3825177799
TC_10	0.2880395867
TC_11	0.4225227925
TC_12	0.3626959525
TC_13	0.4787832011
TC_14	0.3797655995
TC_15	0.2914128075
TC_16	0.3877433316
TC_17	0.3331267607
TC_18	0.6201948479
TC_19	0.713510085
TC_20	0.3102388228
TC_21	0.4083541181
TC_22	0.3300485534
TC_23	0.5122859646
TC_24	0.1899445993
TC_25	0
TC_26	0
TC_27	0
TC_28	0.6457634802
TC_29	0.2859224427
TG_1	0.6672353488
TG_2	0.5972101546
TG_3	0.3608817203
TG_4	0.4413025441
TG_5	0.4595972227
TG_6	0.3609787799
TG_7	0.5419092964
TG_8	0.2631477926
TG_9	0.7638097949
TG_10	0.5095529046
TG_11	0.3856956908
TG_12	0.4239097606
TG_13	0.4600755137
TG_14	0.4683044086
TG_15	0.4280817173
TG_16	0.3423612854
TG_17	0.350310388
TG_18	0.3825281265
TG_19	0.3678039889
TG_20	0.4688151296
TG_21	0.3829784718
TG_22	0.4289238418
TG_23	0.5936154735
TG_24	0.3297576475
TG_25	0.891801659
TG_26	0
TG_27	0
TG_28	0.5085307342
TG_29	0.6394098139
TT_1	0.5011986981
TT_2	0.2164323494
TT_3	0.5384900191
TT_4	0.4048005412
TT_5	0.2402607679
TT_6	0.2802962114
TT_7	0.2301708669
TT_8	0.3273005736
TT_9	0.3841477063
TT_10	0.2134636563
TT_11	0.4748085916
TT_12	0.2571475566
TT_13	0.2722335436
TT_14	0.2250135068
TT_15	0.2061003889
TT_16	0.2085440878
TT_17	0.2578887875
TT_18	0.2482990877
TT_19	0.1523968686
TT_20	0.1582686329
TT_21	0.3047574887
TT_22	0.2595976631
TT_23	0.3008962332
TT_24	0.3229987412
TT_25	0
TT_26	0
TT_27	0
TT_28	0.2985691333
TT_29	0.2170920999
AAA_1	0.1600588863
AAA_2	0.0847005036
AAA_3	0.1961381666
AAA_4	0.148652487
AAA_5	0.1357213611
AAA_6	0.2958342203
AAA_7	0.1711940408
AAA_8	0.1188686836
AAA_9	0.0571247253
AAA_10	0.1838121209
AAA_11	0.0626402353
AAA_12	0.1044885552
AAA_13	0.4027989752
AAA_14	0.1704879023
AAA_15	0.0918892904
AAA_16	0.2482781148
AAA_17	0.2024355669
AAA_18	0.1788418111
AAA_19	0.192733332
AAA_20	0.1378823359
AAA_21	0.0884980092
AAA_22	0.0481935982
AAA_23	0.1200095279
AAA_24	0
AAA_25	0
AAA_26	0
AAA_27	0
AAA_28	0.1567566316
AAC_1	0.0548950886
AAC_2	0.1075897352
AAC_3	0.1499145547
AAC_4	0.1616670406
AAC_5	0.171613487
AAC_6	0.2242007719
AAC_7	0.5986470907
AAC_8	0.2299142922
AAC_9	0.157370455
AAC_10	0.0975775443
AAC_11	0.1612353119
AAC_12	0.0934933931
AAC_13	0.1430759458
AAC_14	0.1868260914
AAC_15	0.26535168
AAC_16	0.170939985
AAC_17	0.1311259093
AAC_18	0.3842642829
AAC_19	0.1646757138
AAC_20	0.6008096669
AAC_21	0.3081812179
AAC_22	0.0340404698
AAC_23	0.0445376521
AAC_24	0
AAC_25	0
AAC_26	0
AAC_27	0
AAC_28	0.1114165489
AAG_1	0.2396926281
AAG_2	0.4449169842
AAG_3	0.1490470438
AAG_4	0.1487045319
AAG_5	0.3562923648
AAG_6	0.0871446514
AAG_7	0.1877552952
AAG_8	0.1929552936
AAG_9	0.1988491262
AAG_10	0.1086372309
AAG_11	0.2378994694
AAG_12	0.1666512011
AAG_13	0.2933975024
AAG_14	0.6349740751
AAG_15	0.2879482431
AAG_16	0.1202799238
AAG_17	0.1557640757
AAG_18	0.1223847518
AAG_19	0.1452441266
AAG_20	0.1831977351
AAG_21	0.3017997803
AAG_22	0.2136521795
AAG_23	0.3535686898
AAG_24	0.3756785685
AAG_25	0
AAG_26	0
AAG_27	0
AAG_28	0.3234633035
AAT_1	0.2085056008
AAT_2	0.2586613809
AAT_3	0.1145969279
AAT_4	0.2061797958
AAT_5	0.2818187824
AAT_6	0.1299743974
AAT_7	0.21020377
AAT_8	0.0991634003
AAT_9	0.2591331012
AAT_10	0.0511066198
AAT_11	0.2229266658
AAT_12	0.0806664299
AAT_13	0.1482096167
AAT_14	0.165309086
AAT_15	0.1282447257
AAT_16	0.0785343797
AAT_17	0.1639870872
AAT_18	0.1242394711
AAT_19	0.5778697368
AAT_20	0.2104615253
AAT_21	0.0733453943
AAT_22	0.0447069609
AAT_23	0.0677993145
AAT_24	0
AAT_25	0
AAT_26	0
AAT_27	0
AAT_28	0.1209984098
ACA_1	0.1292955765
ACA_2	0.2412692
ACA_3	0.1811112338
ACA_4	0.1431263858
ACA_5	0.2885908099
ACA_6	0.3385734377
ACA_7	0.3676720837
ACA_8	0.5483232929
ACA_9	0.1910494788
ACA_10	0.2243634492
ACA_11	0.215140326
ACA_12	0.1448533728
ACA_13	0.2842015112
ACA_14	0.1951558173
ACA_15	0.1858171118
ACA_16	0.2108313338
ACA_17	0.1337191838
ACA_18	0.2650297616
ACA_19	0.3558961917
ACA_20	0.2220759391
ACA_21	0.2862701764
ACA_22	0.6060382401
ACA_23	0.1720564658
ACA_24	0
ACA_25	0
ACA_26	0
ACA_27	0
ACA_28	0.1876058485
ACC_1	0.2725777807
ACC_2	0.211261232
ACC_3	0.114166383
ACC_4	0.1895224602
ACC_5	0.1128837943
ACC_6	0.1291399919
ACC_7	0.2498618745
ACC_8	0.1454582739
ACC_9	0.1759308247
ACC_10	0.2688868699
ACC_11	0.145050559
ACC_12	0.1848515914
ACC_13	0.1281046657
ACC_14	0.2188050518
ACC_15	0.2455820997
ACC_16	0.5795949273
ACC_17	0.12423638
ACC_18	0.1354288827
ACC_19	0.8324047302
ACC_20	0.3031284367
ACC_21	0.6635881334
ACC_22	0.2814807915
ACC_23	0.0855600789
ACC_24	0
ACC_25	0
ACC_26	0
ACC_27	0
ACC_28	0.1711363344
ACG_1	0.2185998346
ACG_2	0.1447111363
ACG_3	0.0566218694
ACG_4	0.0503248102
ACG_5	0.0939484537
ACG_6	0.036941506
ACG_7	0.0989403757
ACG_8	0.1179786628
ACG_9	0.1360719871
ACG_10	0.1023272478
ACG_11	0.110934474
ACG_12	0.1403017608
ACG_13	0.1361384707
ACG_14	0.1294412226
ACG_15	0.2839822776
ACG_16	0.1175113457
ACG_17	0.160698276
ACG_18	0.2354818705
ACG_19	0.0610176374
ACG_20	0.1392696498
ACG_21	0.1820111552
ACG_22	0.3814051705
ACG_23	0.139773447
ACG_24	0.5046299461
ACG_25	0
ACG_26	0
ACG_27	0
ACG_28	0.2736112494
ACT_1	0.1751278484
ACT_2	0.2627737876
ACT_3	0.121988416
ACT_4	0.1111307152
ACT_5	0.5063605953
ACT_6	0.1098514582
ACT_7	0.3240875824
ACT_8	0.357744449
ACT_9	0.2372411142
ACT_10	0.1394317544
ACT_11	0.1640306183
ACT_12	0.2434851458
ACT_13	0.2371942903
ACT_14	0.317568911
ACT_15	0.1082412204
ACT_16	0.3068871495
ACT_17	0.1828088616
ACT_18	0.0775965774
ACT_19	0.1300940422
ACT_20	0.163118677
ACT_21	0.2403077964
ACT_22	0.1245959169
ACT_23	0.146641087
ACT_24	0
ACT_25	0
ACT_26	0
ACT_27	0
ACT_28	0.200722881
AGA_1	0.2035487627
AGA_2	0.1081459032
AGA_3	0.241396402
AGA_4	0.0848458922
AGA_5	0.1811590463
AGA_6	0.3012778463
AGA_7	0.172467026
AGA_8	0.1591588633
AGA_9	0.1777986136
AGA_10	0.1814999721
AGA_11	0.1540585021
AGA_12	0.219751094
AGA_13	0.2945214803
AGA_14	0.2111145422
AGA_15	0.1964239509
AGA_16	0.3783729637
AGA_17	0.1131318348
AGA_18	0.1551120457
AGA_19	0.2284885717
AGA_20	0.1390015673
AGA_21	0.5116026367
AGA_22	0.2028510069
AGA_23	0.1766549375
AGA_24	0
AGA_25	0
AGA_26	0
AGA_27	0
AGA_28	0.1410559396
AGC_1	0.1276605495
AGC_2	0.1210404982
AGC_3	0.1557759392
AGC_4	0.2220669465
AGC_5	0.4119112989
AGC_6	0.212509917
AGC_7	0.6215529533
AGC_8	0.2191399318
AGC_9	0.2255559884
AGC_10	0.1324072018
AGC_11	0.2239355534
AGC_12	0.4326986374
AGC_13	0.3293083968
AGC_14	0.1570891416
AGC_15	0.2312673187
AGC_16	0.3606555081
AGC_17	0.1237270358
AGC_18	0.8286606217
AGC_19	0.1477062347
AGC_20	0.2920324663
AGC_21	0.3944156689
AGC_22	0.1403514401
AGC_23	0.2511985542
AGC_24	0
AGC_25	0
AGC_26	0
AGC_27	0
AGC_28	0.1924317811
AGG_1	0.332362467
AGG_2	0.4028737863
AGG_3	0.2150355013
AGG_4	0.134918743
AGG_5	0.1264326474
AGG_6	0.3584540935
AGG_7	0.2164583941
AGG_8	0.2119968627
AGG_9	0.1646506408
AGG_10	0.1586446279
AGG_11	0.088392017
AGG_12	0.2342269514
AGG_13	0.1531083923
AGG_14	0.3552594183
AGG_15	0.4252354249
AGG_16	0.2331426497
AGG_17	0.476021745
AGG_18	0.1976761568
AGG_19	0.1731373691
AGG_20	0.1193249919
AGG_21	0.3067459251
AGG_22	0.4416919995
AGG_23	0.579514054
AGG_24	0.4957326555
AGG_25	0.7319081025
AGG_26	0
AGG_27	0
AGG_28	0.2425414128
AGT_1	0.3199398652
AGT_2	0.1594234325
AGT_3	0.1037163155
AGT_4	0.1644166467
AGT_5	0.2694707331
AGT_6	0.2122868515
AGT_7	0.2134395358
AGT_8	0.0756937252
AGT_9	0.0603718415
AGT_10	0.3928606891
AGT_11	0.250310733
AGT_12	0.1761807251
AGT_13	0.4677493653
AGT_14	0.4146155232
AGT_15	0.2364314683
AGT_16	0.3944454511
AGT_17	0.1026624604
AGT_18	0.0826443498
AGT_19	0.1994392006
AGT_20	0.2254833387
AGT_21	0.0691486834
AGT_22	0.1255585336
AGT_23	0.3059658273
AGT_24	0
AGT_25	0
AGT_26	0
AGT_27	0
AGT_28	0.1682543416
ATA_1	0.0791448989
ATA_2	0.2288955755
ATA_3	0.2779343413
ATA_4	0.0810997094
ATA_5	0.3837103669
ATA_6	0.1419468839
ATA_7	0.0631626714
ATA_8	0.0495422788
ATA_9	0.1307790866
ATA_10	0.1430889953
ATA_11	0.27690678
ATA_12	0.1731056079
ATA_13	0.0744919605
ATA_14	0.1174195546
ATA_15	0.2416533238
ATA_16	0.2334691262
ATA_17	0.1483850751
ATA_18	0.0829267576
ATA_19	0.1114196432
ATA_20	0.1420458461
ATA_21	0.0427038244
ATA_22	0.026865524
ATA_23	0.0486893818
ATA_24	0
ATA_25	0
ATA_26	0
ATA_27	0
ATA_28	0.2710641729
ATC_1	0.0804257231
ATC_2	0.1134856144
ATC_3	0.0988714304
ATC_4	0.1914602674
ATC_5	0.0680127788
ATC_6	0.3638342372
ATC_7	0.122289067
ATC_8	0.1615024142
ATC_9	0.1916490173
ATC_10	0.2933740216
ATC_11	0.1841215698
ATC_12	0.2595918653
ATC_13	0.2812690672
ATC_14	0.3427960946
ATC_15	0.1746988299
ATC_16	0.2549099361
ATC_17	0.2569005755
ATC_18	0.41043052
ATC_19	0.1353837992
ATC_20	0.2560344669
ATC_21	0.1780051863
ATC_22	0.0417818523
ATC_23	0.0478803007
ATC_24	0
ATC_25	0
ATC_26	0
ATC_27	0
ATC_28	0.0812540609
ATG_1	0.3696347751
ATG_2	0.2839314055
ATG_3	0.1880528384
ATG_4	0.176457344
ATG_5	0.1073615456
ATG_6	0.2164798275
ATG_7	0.2088586438
ATG_8	0.1816869127
ATG_9	0.3638196638
ATG_10	0.2688898418
ATG_11	0.2834510409
ATG_12	0.0983679981
ATG_13	0.1907862546
ATG_14	0.2241622727
ATG_15	0.2191104428
ATG_16	0.2230403509
ATG_17	0.2556855907
ATG_18	0.2582703885
ATG_19	0.3116106702
ATG_20	0.3200848722
ATG_21	0.403182279
ATG_22	0.215590876
ATG_23	0.1794949893
ATG_24	0.3664765878
ATG_25	0
ATG_26	0
ATG_27	0
ATG_28	0.366357414
ATT_1	0.0998868813
ATT_2	0.1190044894
ATT_3	0.1864540588
ATT_4	0.1586130978
ATT_5	0.1366453561
ATT_6	0.1278635688
ATT_7	0.1452858991
ATT_8	0.112208774
ATT_9	0.072545816
ATT_10	0.074599314
ATT_11	0.0972776732
ATT_12	0.1422356897
ATT_13	0.1096358403
ATT_14	0.1239699842
ATT_15	0.0799350732
ATT_16	0.1323035321
ATT_17	0.2970642745
ATT_18	0.0617488871
ATT_19	0.0924242685
ATT_20	0.0615378462
ATT_21	0.0663797303
ATT_22	0.0093343434
ATT_23	0.0403980827
ATT_24	0
ATT_25	0
ATT_26	0
ATT_27	0
ATT_28	0.1719398831
CAA_1	0.2594474212
CAA_2	0.2038877852
CAA_3	0.2856583365
CAA_4	0.3016665681
CAA_5	0.282737126
CAA_6	0.4882780855
CAA_7	0.1094126131
CAA_8	0.104504524
CAA_9	0.1612758125
CAA_10	0.0841242525
CAA_11	0.1424137312
CAA_12	0.1318626571
CAA_13	0.2794704723
CAA_14	0.1155705031
CAA_15	0.1584491544
CAA_16	0.1296450033
CAA_17	0.1535819211
CAA_18	0.4326087009
CAA_19	0.2334400821
CAA_20	0.3578058357
CAA_21	0.2162962671
CAA_22	0.5280201232
CAA_23	0.2343017785
CAA_24	0
CAA_25	0
CAA_26	0
CAA_27	0
CAA_28	0.1749374407
CAC_1	0.4940786571
CAC_2	0.182879386
CAC_3	0.147399052
CAC_4	0.2060194882
CAC_5	0.1343530008
CAC_6	0.2318565825
CAC_7	0.2135905989
CAC_8	0.2915066545
CAC_9	0.2417387267
CAC_10	0.1487968926
CAC_11	0.2653984045
CAC_12	0.250585681
CAC_13	0.1320792719
CAC_14	0.1570918554
CAC_15	0.24892689
CAC_16	0.1509726366
CAC_17	0.2203231878
CAC_18	0.1967649103
CAC_19	0.0855482334
CAC_20	0.5621410431
CAC_21	0.2170071762
CAC_22	0.2015266061
CAC_23	0.4968984913
CAC_24	0
CAC_25	0
CAC_26	0
CAC_27	0
CAC_28	0.3382329287
CAG_1	0.2579495652
CAG_2	0.1781656669
CAG_3	0.1977973984
CAG_4	0.2753648696
CAG_5	0.2386903096
CAG_6	0.2727168642
CAG_7	0.2303610212
CAG_8	0.1262191548
CAG_9	0.2152111389
CAG_10	0.2224157895
CAG_11	0.4755345185
CAG_12	0.31608777
CAG_13	0.2773233854
CAG_14	0.3011596486
CAG_15	0.3134305077
CAG_16	0.181690526
CAG_17	0.1615729719
CAG_18	0.2885363685
CAG_19	0.2548147289
CAG_20	0.7368447886
CAG_21	0.3505477149
CAG_22	0.4792658685
CAG_23	0.6447262845
CAG_24	0.509378645
CAG_25	0
CAG_26	0
CAG_27	0
CAG_28	0.3758644518
CAT_1	0.1630900966
CAT_2	0.0822620664
CAT_3	0.2071536952
CAT_4	0.1606973786
CAT_5	0.1454010121
CAT_6	0.1778730348
CAT_7	0.1157847587
CAT_8	0.4202467861
CAT_9	0.3787051369
CAT_10	0.513846362
CAT_11	0.2903555477
CAT_12	0.0966287465
CAT_13	0.1876358589
CAT_14	0.2065263632
CAT_15	0.231353383
CAT_16	0.3516736451
CAT_17	0.2635594256
CAT_18	0.2308878923
CAT_19	0.1595891924
CAT_20	0.0920640008
CAT_21	0.0662679507
CAT_22	0.1572390349
CAT_23	0.2137327211
CAT_24	0
CAT_25	0
CAT_26	0
CAT_27	0
CAT_28	0.1925585843
CCA_1	0.2118712616
CCA_2	0.1647755314
CCA_3	0.2278139884
CCA_4	0.1734590874
CCA_5	0.3471859669
CCA_6	0.2075860188
CCA_7	0.1541194523
CCA_8	0.2403806642
CCA_9	0.1703175403
CCA_10	0.2710917578
CCA_11	0.3173171318
CCA_12	0.3006520033
CCA_13	0.1974228028
CCA_14	0.353541357
CCA_15	0.1991624938
CCA_16	0.145030038
CCA_17	0.5030097997
CCA_18	0.2829196336
CCA_19	0.1976763841
CCA_20	0.8129736919
CCA_21	0.5178842438
CCA_22	0.5544494277
CCA_23	0.1636553584
CCA_24	0
CCA_25	0
CCA_26	0
CCA_27	0
CCA_28	0.3661847915
CCC_1	0.238069419
CCC_2	0.229915042
CCC_3	0.107366155
CCC_4	0.1561584733
CCC_5	0.0642241679
CCC_6	0.1501457765
CCC_7	0.1429953471
CCC_8	0.1647732319
CCC_9	0.112313974
CCC_10	0.1619081532
CCC_11	0.1174486113
CCC_12	0.1399347662
CCC_13	0.1853508823
CCC_14	0.2516605613
CCC_15	0.1563238259
CCC_16	0.2043448419
CCC_17	0.2229334324
CCC_18	0.07228751
CCC_19	0.1582472468
CCC_20	1.117406889
CCC_21	0.1633396248
CCC_22	0.1965195057
CCC_23	0.2009143967
CCC_24	0
CCC_25	0
CCC_26	0
CCC_27	0
CCC_28	0.2224894068
CCG_1	0.1287899012
CCG_2	0.1826953739
CCG_3	0.4201047213
CCG_4	0.2266232851
CCG_5	0.0404615512
CCG_6	0.3346770177
CCG_7	0.1309697915
CCG_8	0.1366155866
CCG_9	0.2217173525
CCG_10	0.0760707439
CCG_11	0.4151283571
CCG_12	0.1605718186
CCG_13	0.0921093846
CCG_14	0.0732309078
CCG_15	0.0960922755
CCG_16	0.101576866
CCG_17	0.2319268639
CCG_18	0.0683602285
CCG_19	0.0690936163
CCG_20	0.9383808198
CCG_21	0.3599710787
CCG_22	0.5620469211
CCG_23	0.0648850406
CCG_24	0.2559412212
CCG_25	0
CCG_26	0
CCG_27	0
CCG_28	0.1403417927
CCT_1	0.2579968676
CCT_2	0.3490015991
CCT_3	0.1536962673
CCT_4	0.1015968289
CCT_5	0.2232142137
CCT_6	0.1229203541
CCT_7	0.3088094732
CCT_8	0.2200911624
CCT_9	0.2037861956
CCT_10	0.1175189775
CCT_11	0.1422478389
CCT_12	0.1344207268
CCT_13	0.2237664185
CCT_14	0.1299994017
CCT_15	0.1484057299
CCT_16	0.3316678156
CCT_17	0.2456644167
CCT_18	0.1070677771
CCT_19	0.1411727786
CCT_20	0.1776570923
CCT_21	0.1102112514
CCT_22	0.18089375
CCT_23	0.1721793674
CCT_24	0
CCT_25	0
CCT_26	0
CCT_27	0
CCT_28	0.3162824245
CGA_1	0.1015504992
CGA_2	0.1720207682
CGA_3	0.1230763307
CGA_4	0.1123797784
CGA_5	0.1060947836
CGA_6	0.0753446853
CGA_7	0.1453089355
CGA_8	0.0358100371
CGA_9	0.1156394864
CGA_10	0.2803650176
CGA_11	0.1054518186
CGA_12	0.2584875032
CGA_13	0.2755589753
CGA_14	0.1483434628
CGA_15	0.1187817849
CGA_16	0.1207392968
CGA_17	0.2518618313
CGA_18	0.0445042023
CGA_19	0.1983352729
CGA_20	0.1158574349
CGA_21	0.1674302532
CGA_22	0.3511953983
CGA_23	0.4446197704
CGA_24	0
CGA_25	0
CGA_26	0
CGA_27	0
CGA_28	0.2082487754
CGC_1	0.1719222744
CGC_2	0.280161392
CGC_3	0.1208608771
CGC_4	0.1453274939
CGC_5	0.0912557714
CGC_6	0.1540300839
CGC_7	0.0919355373
CGC_8	0.0473123411
CGC_9	0.0810834754
CGC_10	0.2010692114
CGC_11	0.0572741335
CGC_12	0.0486525295
CGC_13	0.0571580585
CGC_14	0.1827146954
CGC_15	0.1028511663
CGC_16	0.0573653305
CGC_17	0.0766877476
CGC_18	0.2398360878
CGC_19	0.0875429393
CGC_20	0.1435325498
CGC_21	0.1703478308
CGC_22	0.0972099841
CGC_23	0.1970746826
CGC_24	0
CGC_25	0
CGC_26	0
CGC_27	0
CGC_28	0.1354939103
CGG_1	0.1745493428
CGG_2	0.142984635
CGG_3	0.2092046352
CGG_4	0.2379611125
CGG_5	0.0505220177
CGG_6	0.1563652785
CGG_7	0.0816842409
CGG_8	0.207788392
CGG_9	0.2631612702
CGG_10	0.206362359
CGG_11	0.0504708698
CGG_12	0.1303006296
CGG_13	0.1289613107
CGG_14	0.0672425409
CGG_15	0.1338364318
CGG_16	0.1550482486
CGG_17	0.0651255584
CGG_18	0.0400450302
CGG_19	0.0581232566
CGG_20	0.1124869485
CGG_21	0.3192941789
CGG_22	0.2485156276
CGG_23	0.1054221195
CGG_24	0.1587436368
CGG_25	0.683449904
CGG_26	0
CGG_27	0
CGG_28	0.1035943624
CGT_1	0.3121220501
CGT_2	0.0746620782
CGT_3	0.1614313827
CGT_4	0.1907605664
CGT_5	0.1575818218
CGT_6	0.0588138851
CGT_7	0.1041666122
CGT_8	0.2705045176
CGT_9	0.167343019
CGT_10	0.1932293832
CGT_11	0.1933501688
CGT_12	0.1984650224
CGT_13	0.2907943638
CGT_14	0.1025131946
CGT_15	0.3521115792
CGT_16	0.0844494832
CGT_17	0.1390911234
CGT_18	0.3532277537
CGT_19	0.076874943
CGT_20	0.3174870382
CGT_21	0.220840367
CGT_22	0.0786497145
CGT_23	0.4581128108
CGT_24	0
CGT_25	0
CGT_26	0
CGT_27	0
CGT_28	0.1871719456
CTA_1	0.0702249559
CTA_2	0.1110502496
CTA_3	0.1560800322
CTA_4	0.2313940365
CTA_5	0.0748650136
CTA_6	0.1069470562
CTA_7	0.0560914873
CTA_8	0.097231287
CTA_9	0.1538844695
CTA_10	0.1346700193
CTA_11	0.1422192406
CTA_12	0.1522243203
CTA_13	0.099058268
CTA_14	0.2496219898
CTA_15	0.1092599651
CTA_16	0.1878185349
CTA_17	0.6821995787
CTA_18	0.1907282513
CTA_19	0.1448148707
CTA_20	0.2265747546
CTA_21	0.06161282
CTA_22	0.0493885663
CTA_23	0.2318938324
CTA_24	0
CTA_25	0
CTA_26	0
CTA_27	0
CTA_28	0.2007919357
CTC_1	0.1840221029
CTC_2	0.256321218
CTC_3	0.1513221255
CTC_4	0.1607428884
CTC_5	0.1413757122
CTC_6	0.1463160771
CTC_7	0.1131007346
CTC_8	0.2527175848
CTC_9	0.3445259145
CTC_10	0.1743258492
CTC_11	0.1251530225
CTC_12	0.1831054662
CTC_13	0.1639814738
CTC_14	0.1825581751
CTC_15	0.2693216895
CTC_16	0.0911623104
CTC_17	0.3422283069
CTC_18	0.3698767906
CTC_19	0.0960321806
CTC_20	0.17084578
CTC_21	0.1507530571
CTC_22	0.1730332636
CTC_23	0.1129109025
CTC_24	0
CTC_25	0
CTC_26	0
CTC_27	0
CTC_28	0.2842169996
CTG_1	0.2418766886
CTG_2	0.130862137
CTG_3	0.3136313327
CTG_4	0.1284153991
CTG_5	0.3364366324
CTG_6	0.3701651979
CTG_7	0.2121216841
CTG_8	0.2423727755
CTG_9	0.291278319
CTG_10	0.1525014699
CTG_11	0.1623729812
CTG_12	0.1795206921
CTG_13	0.2577082646
CTG_14	0.4849073233
CTG_15	0.2002707434
CTG_16	0.1847950954
CTG_17	0.262642949
CTG_18	0.2599361528
CTG_19	0.1410837317
CTG_20	0.3021805551
CTG_21	0.1877719602
CTG_22	0.3656286679
CTG_23	0.1433524487
CTG_24	1.2711296538
CTG_25	0
CTG_26	0
CTG_27	0
CTG_28	0.2902212856
CTT_1	0.1027897754
CTT_2	0.4978443989
CTT_3	0.4077667898
CTT_4	0.0463600414
CTT_5	0.2032878821
CTT_6	0.2366459272
CTT_7	0.0952758745
CTT_8	0.2464542221
CTT_9	0.1595306332
CTT_10	0.4129993881
CTT_11	0.136539786
CTT_12	0.2380888637
CTT_13	0.1574995289
CTT_14	0.1344005321
CTT_15	0.1594719869
CTT_16	0.1245135628
CTT_17	0.0904862078
CTT_18	0.0973944307
CTT_19	0.0439292277
CTT_20	0.143877433
CTT_21	0.1024286467
CTT_22	0.0733582317
CTT_23	0.1651474195
CTT_24	0
CTT_25	0
CTT_26	0
CTT_27	0
CTT_28	0.214900558
GAA_1	0.2172303358
GAA_2	0.1577721369
GAA_3	0.109687989
GAA_4	0.1110106115
GAA_5	0.2028594739
GAA_6	0.239902341
GAA_7	0.1600201643
GAA_8	0.1818471084
GAA_9	0.1823881711
GAA_10	0.1149298317
GAA_11	0.1956237468
GAA_12	0.4379732267
GAA_13	0.4328225367
GAA_14	0.6037920528
GAA_15	0.1507314901
GAA_16	0.1895962671
GAA_17	0.2983803
GAA_18	0.1412654515
GAA_19	0.1080075244
GAA_20	0.1304097269
GAA_21	0.0909670409
GAA_22	0.311971206
GAA_23	0.1889185208
GAA_24	0
GAA_25	0
GAA_26	0
GAA_27	0.3787145068
GAA_28	0.1774133766
GAC_1	0.1516034356
GAC_2	0.1467370675
GAC_3	0.123380911
GAC_4	0.1318225201
GAC_5	0.0925934648
GAC_6	0.1852810596
GAC_7	0.3335088102
GAC_8	0.1834049563
GAC_9	0.3552259629
GAC_10	0.2082947464
GAC_11	0.1510644904
GAC_12	0.1579407246
GAC_13	0.2552377212
GAC_14	0.238735033
GAC_15	0.4781745991
GAC_16	0.0744349853
GAC_17	0.161675148
GAC_18	0.4665099634
GAC_19	0.2456340254
GAC_20	0.303816391
GAC_21	0.5491404569
GAC_22	0.1797721844
GAC_23	0.2365504421
GAC_24	0
GAC_25	0
GAC_26	0
GAC_27	0.3322295316
GAC_28	0.1824887268
GAG_1	0.1431977953
GAG_2	0.150574719
GAG_3	0.4830584996
GAG_4	0.3308107881
GAG_5	0.2310798461
GAG_6	0.21375952
GAG_7	0.153916926
GAG_8	0.1827366653
GAG_9	0.0871603047
GAG_10	0.1719570679
GAG_11	0.1136488834
GAG_12	0.157160286
GAG_13	0.3122173711
GAG_14	0.3675169092
GAG_15	0.5112140654
GAG_16	0.1890570447
GAG_17	0.4706322629
GAG_18	0.1471016788
GAG_19	0.2391244101
GAG_20	0.2684766622
GAG_21	0.1684432403
GAG_22	0.2045788099
GAG_23	0.1472909779
GAG_24	0.4070311525
GAG_25	0
GAG_26	0
GAG_27	0.544103991
GAG_28	0.1411472371
GAT_1	0.0936658542
GAT_2	0.5842007229
GAT_3	0.195628397
GAT_4	0.2620066081
GAT_5	0.2132160941
GAT_6	0.1398024381
GAT_7	0.1010230626
GAT_8	0.2243180025
GAT_9	0.185603444
GAT_10	0.1746252833
GAT_11	0.1402000948
GAT_12	0.1530956266
GAT_13	0.4032342489
GAT_14	0.240685672
GAT_15	0.2217264894
GAT_16	0.2556912163
GAT_17	0.5552408448
GAT_18	0.2517012849
GAT_19	0.2312302092
GAT_20	0.127635524
GAT_21	0.1175305403
GAT_22	0.1764373371
GAT_23	0.2680980831
GAT_24	0
GAT_25	0
GAT_26	0
GAT_27	0.3888600407
GAT_28	0.0928899871
GCA_1	0.1656006738
GCA_2	0.2856256688
GCA_3	0.2844974592
GCA_4	0.2249662888
GCA_5	0.5414620874
GCA_6	0.2779784714
GCA_7	0.1988031102
GCA_8	0.3840066728
GCA_9	0.1575253547
GCA_10	0.165222625
GCA_11	0.2428025821
GCA_12	0.2802170294
GCA_13	0.2538523434
GCA_14	0.2289891024
GCA_15	0.1729096706
GCA_16	0.1879032121
GCA_17	0.2045499269
GCA_18	0.1218763935
GCA_19	1.2039029001
GCA_20	0.1313012021
GCA_21	0.2280841615
GCA_22	0.3697374417
GCA_23	0.1277232954
GCA_24	0
GCA_25	0
GCA_26	0
GCA_27	0.597745294
GCA_28	0.1427686996
GCC_1	0.2416154574
GCC_2	0.1892923933
GCC_3	0.2884929198
GCC_4	0.2040717728
GCC_5	0.1068072189
GCC_6	0.2493015218
GCC_7	0.2183976823
GCC_8	0.3037275699
GCC_9	0.2075221323
GCC_10	0.3115716242
GCC_11	0.2193314531
GCC_12	0.1002522033
GCC_13	0.2906039242
GCC_14	0.1692019889
GCC_15	0.1919123358
GCC_16	0.2891303535
GCC_17	0.1186635658
GCC_18	0.0993203151
GCC_19	0.3185024806
GCC_20	0.1960141582
GCC_21	0.1906085246
GCC_22	0.1562833575
GCC_23	0.1012340292
GCC_24	0
GCC_25	0
GCC_26	0
GCC_27	0.4957305241
GCC_28	0.1470044786
GCG_1	0.2285005212
GCG_2	0.2287019973
GCG_3	0.2073685242
GCG_4	0.1366390882
GCG_5	0.1673305328
GCG_6	0.0767847433
GCG_7	0.0739487005
GCG_8	0.1578630202
GCG_9	0.2014319271
GCG_10	0.1192669652
GCG_11	0.1464590627
[truncated: 7,633 more rows]
