# Supplementary material for: CRISPRpred: A flexible and efficient tool for sgRNAs on-target activity prediction in CRISPR/Cas9 systems
Source: PLoS One. 2017 Aug 2;12(8):e0181943. doi: 10.1371/journal.pone.0181943 (PMC5540555; doi:10.1371/journal.pone.0181943)
Supplement: S3 File — This file contains scores predicted by CRISPRpred. (CSV) [file pone.0181943.s003.csv]

	gene	result	rank	azimuth	crisprpred
112	CCDC101	1	0.932885906	0.5723678862	0.2848286431
197	CCDC101	0	0.543624161	0.450016491	0.0025887466
267	CCDC101	1	0.912751678	0.7470366691	0.4893471427
305	CCDC101	0	0.66442953	0.5449344734	0.071312743
309	CCDC101	0	0.684563758	0.5602754691	0.5410667197
315	CCDC101	0	0.087248322	0.4358839567	0.0060131349
337	CCDC101	0	0.583892617	0.7301182992	0.3956749932
387	CCDC101	0	0.55704698	0.6129706452	0.3324156574
454	CCDC101	0	0.127516779	0.307841832	-0.0393297351
531	CCDC101	0	0.744966443	0.5420960625	0.2951632516
624	CCDC101	0	0.637583893	0.5811059649	-0.0687525601
675	CCDC101	0	0.785234899	0.3614381939	-0.1790921914
687	CCDC101	0	0.422818792	0.3811501626	0.1439201618
719	CCDC101	1	0.845637584	0.5108965679	0.4633353616
769	CCDC101	1	0.919463087	0.6582314459	0.248131857
822	CCDC101	1	0.926174497	0.566367582	0.3658729312
836	CCDC101	0	0.751677852	0.4735140154	0.2480385701
892	CCDC101	1	0.805369128	0.6637780531	0.4497918459
1035	CCDC101	0	0.55033557	0.4565275926	0.0433524696
1070	CCDC101	0	0.093959732	0.3691548391	0.1974545896
1075	CCDC101	1	0.953020134	0.7101392237	0.1392691066
1137	CCDC101	0	0.302013423	0.4692707534	0.1896679611
1207	CCDC101	0	0.281879195	0.5015839907	-0.0466791249
1222	CCDC101	0	0.11409396	0.4659667232	0.2650101181
1271	CCDC101	0	0.308724832	0.4434145604	0.3466826847
1380	CCDC101	1	0.986577181	0.5258954612	0.2145866739
1422	CCDC101	1	0.852348993	0.5225236837	0.5262893231
1432	CCDC101	0	0.577181208	0.6359203231	0.2637049849
1502	CCDC101	0	0.187919463	0.3402836022	-0.2870809126
1510	CCDC101	0	0.44966443	0.5166535055	0.2449345319
1519	CCDC101	1	0.973154362	0.552065703	0.2667234541
1558	CCDC101	1	0.872483221	0.6512718596	0.4460202449
1638	CCDC101	0	0.624161074	0.6631375541	0.3027587016
1646	CCDC101	0	0.731543624	0.5846350626	0.4451879237
1651	CCDC101	1	0.838926174	0.4357644112	0.3169442287
1665	CCDC101	0	0.073825503	0.244414061	-0.0175830639
1682	CCDC101	0	0.469798658	0.4877345434	0.0548836575
1692	CCDC101	1	0.825503356	0.7630917604	0.298831626
1730	CCDC101	0	0.080536913	0.3950154536	0.0855613756
1754	CCDC101	0	0.657718121	0.5983899833	0.0717191594
1780	CCDC101	0	0.201342282	0.3731970521	0.143715111
1795	CCDC101	0	0.496644295	0.59605902	0.0809880589
1803	CCDC101	0	0.040268456	0.1248721084	0.3788120826
1808	CCDC101	0	0.006711409	0.3892235932	0.2587434384
1821	CCDC101	0	0.342281879	0.4762295891	0.2193267337
1823	CCDC101	0	0.248322148	0.3970177809	0.4926882758
1833	CCDC101	0	0.020134228	0.1931884027	0.0750889517
1840	CCDC101	0	0.067114094	0.5038806203	0.2004630233
1842	CCDC101	0	0.483221477	0.6675504436	0.0500066298
1870	CCDC101	1	0.946308725	0.7138230163	0.3543836377
1877	CCDC101	0	0.275167785	0.2384119112	-0.0152725253
1884	CCDC101	0	0.771812081	0.4807214422	-0.0791605968
1889	CCDC101	0	0.476510067	0.5577971987	-0.0068582159
1921	CCDC101	0	0.630872483	0.6486367393	0.2380280118
1990	CCDC101	0	0.429530201	0.5665302662	0.6803439902
2005	CCDC101	0	0.597315436	0.4637992378	0.1988877269
2047	CCDC101	0	0.268456376	0.5394174507	0.1566312446
2082	CCDC101	0	0.147651007	0.3765594013	0.011856581
2103	CCDC101	0	0.161073826	0.438262716	0.0516010908
2107	CCDC101	0	0.026845638	0.2776568377	-0.1472893366
2144	CCDC101	0	0.402684564	0.5919108086	0.0421773041
2147	CCDC101	0	0.382550336	0.5913651734	-0.0518734045
2155	CCDC101	0	0.167785235	0.3380971108	-0.0443314627
2163	CCDC101	0	0.060402685	0.4679782141	0.0266935982
2179	CCDC101	1	0.979865772	0.6025626014	0.4546491608
2196	CCDC101	0	0.10738255	0.4155836325	0.1803758522
2215	CCDC101	0	0.590604027	0.6234924388	0.3054958454
2260	CCDC101	1	0.939597315	0.5750335666	0.1074659355
2291	CCDC101	0	0.140939597	0.3944214729	0.0949945705
2325	CCDC101	0	0.503355705	0.4020505852	0.2019010157
2364	CCDC101	0	0.765100671	0.5128349115	0.1055607798
2374	CCDC101	0	0.100671141	0.4917606481	0.1964975728
2391	CCDC101	1	0.89261745	0.5540979633	0.1395561506
2411	CCDC101	0	0.228187919	0.3953119358	-0.0981175539
2418	CCDC101	0	0.416107383	0.6190383135	0.1003219634
2441	CCDC101	0	0.295302013	0.4933080351	0.2286308881
2500	CCDC101	0	0.32885906	0.6567723893	0.2878077392
2504	CCDC101	1	0.859060403	0.4427950566	0.2253257844
2515	CCDC101	0	0.174496644	0.5660410845	0.3170676315
2553	CCDC101	0	0.677852349	0.5842880845	0.3644844308
2572	CCDC101	0	0.510067114	0.5569566208	0.3149493077
2632	CCDC101	1	0.88590604	0.7010017006	0.7764373552
2662	CCDC101	0	0.369127517	0.538664329	0.2387083975
2805	CCDC101	0	0.120805369	0.3266277237	-0.1998317093
2831	CCDC101	0	0.704697987	0.6032140966	0.0888566168
2851	CCDC101	1	0.906040268	0.4494726282	0.1801412726
2894	CCDC101	1	0.966442953	0.4836647064	0.1544947904
2899	CCDC101	0	0.154362416	0.4957444575	0.2404057237
2901	CCDC101	0	0.530201342	0.4631070758	0.2789534306
2910	CCDC101	0	0.724832215	0.4858347184	-0.0008585785
2913	CCDC101	0	0.523489933	0.5805474562	-0.0403197651
2931	CCDC101	0	0.013422819	0.3398368634	0.2108890745
3038	CCDC101	0	0.436241611	0.4785581974	0.1731820508
3056	CCDC101	0	0.456375839	0.6802949565	0.2865012807
3059	CCDC101	1	0.865771812	0.510970172	0.0144674461
3068	CCDC101	1	0.818791946	0.6884136753	0.1954188294
3075	CCDC101	0	0.033557047	0.2225494289	0.2152197616
3090	CCDC101	0	0.570469799	0.4642263708	0.2764157471
3117	CCDC101	0	0.181208054	0.4774471435	0.3255386907
3128	CCDC101	0	0.288590604	0.402679493	0.3802271292
3208	CCDC101	0	0.241610738	0.6533639976	0.4416706325
3216	CCDC101	0	0.315436242	0.4009969538	0.1958784995
3320	CCDC101	0	0.255033557	0.2592956659	0.025128698
3327	CCDC101	0	0.322147651	0.4310231295	-0.0118957079
3373	CCDC101	0	0.791946309	0.4872912151	0.2715799689
3405	CCDC101	0	0.697986577	0.5372343016	0.3202976554
3432	CCDC101	0	0.711409396	0.4481766423	-0.2886569078
3462	CCDC101	1	0.812080537	0.3572241366	0.0407461129
3503	CCDC101	0	0.261744966	0.4694054705	0.130487215
3522	CCDC101	0	0.691275168	0.7031256045	0.2716584626
3594	CCDC101	0	0.463087248	0.4918728121	0.1402577445
3598	CCDC101	1	1	0.5231680484	0.2926324486
3637	CCDC101	0	0.046979866	0.2985976335	-0.1722507923
3689	CCDC101	0	0.409395973	0.4226084279	0.1044999002
3726	CCDC101	0	0.234899329	0.4874070117	0.4443901194
3814	CCDC101	0	0.375838926	0.3951280685	0.3012165831
3846	CCDC101	0	0.44295302	0.5664842226	0.4278871335
3860	CCDC101	0	0.395973154	0.566862381	0.3445566318
3865	CCDC101	0	0.610738255	0.5316522561	0.0526888346
3986	CCDC101	0	0.718120805	0.4771292686	0.2067766609
4029	CCDC101	0	0.738255034	0.5439533487	0.3871570746
4270	CCDC101	0	0.134228188	0.5310968338	0.5671128709
4280	CCDC101	0	0.644295302	0.7548279203	0.1230538567
4303	CCDC101	0	0.348993289	0.5627926888	0.0336271832
4324	CCDC101	0	0.208053691	0.5325792148	0.1384101779
4341	CCDC101	1	0.832214765	0.7024105772	0.3963568696
4375	CCDC101	0	0.053691275	0.4345271082	0.3188744346
4431	CCDC101	0	0.758389262	0.4491597988	0.0109629282
4458	CCDC101	1	0.993288591	0.6762633564	0.5360620123
4492	CCDC101	0	0.67114094	0.3736411156	-0.0466826668
4553	CCDC101	1	0.899328859	0.4824800969	0.3683814654
4557	CCDC101	0	0.214765101	0.3692260474	0.0912631299
4567	CCDC101	1	0.879194631	0.6913700662	0.5844995256
4595	CCDC101	1	0.959731544	0.6256726837	0.3784540586
4635	CCDC101	0	0.604026846	0.4276947372	-0.1850417917
4679	CCDC101	0	0.651006711	0.5645546092	0.2305513847
4748	CCDC101	0	0.355704698	0.6253624185	0.2950106259
4766	CCDC101	0	0.33557047	0.5404922802	0.1349508533
4787	CCDC101	0	0.194630872	0.4723357593	-0.1011027348
4873	CCDC101	0	0.617449664	0.6485629855	0.073657061
4874	CCDC101	0	0.516778523	0.4236290707	0.088363655
4909	CCDC101	0	0.389261745	0.4759702145	0.0398898304
4940	CCDC101	0	0.563758389	0.5258272172	0.1380487865
4951	CCDC101	0	0.362416107	0.5633684811	0.3791116925
4986	CCDC101	0	0.489932886	0.5347725781	0.1376875414
4999	CCDC101	0	0.798657718	0.4827903899	0.6142414383
5002	CCDC101	0	0.22147651	0.4362572667	-0.0218515763
5059	CCDC101	0	0.536912752	0.4440077389	-0.0175638491
5237	CCDC101	0	0.77852349	0.425040569	0.2626459949
65	CD13	0	0.752747253	0.5760529154	0.3305850044
96	CD13	0	0.685714286	0.5450770953	0.3701152103
113	CD13	0	0.363736264	0.5852724437	0.1520306835
117	CD13	0	0.078021978	0.4119677088	-0.1228183422
118	CD13	0	0.150549451	0.3998991239	0.0623572962
126	CD13	0	0.279120879	0.4026269412	-0.1667796395
132	CD13	0	0.403296703	0.4723488007	0.3507225674
148	CD13	1	0.992307692	0.5857518339	0.271922896
209	CD13	0	0.597802198	0.5670840793	0.1758576148
226	CD13	0	0.624175824	0.6115119523	0.405673276
231	CD13	1	0.817582418	0.6747295891	0.2302843265
233	CD13	0	0.506593407	0.4749053953	0.0615693011
234	CD13	1	0.972527473	0.7028734546	0.5147659178
276	CD13	0	0.61978022	0.769659643	0.3488436584
278	CD13	0	0.416483516	0.6413991687	0.3031554768
279	CD13	0	0.571428571	0.4772272513	0.1298602368
280	CD13	0	0.292307692	0.3415183653	0.0310592843
283	CD13	0	0.542857143	0.6666796007	0.254989082
285	CD13	0	0.478021978	0.536406011	-0.1768170539
318	CD13	0	0.687912088	0.5930566029	-0.1578358295
319	CD13	0	0.796703297	0.6053745744	0.1767256247
356	CD13	0	0.064835165	0.2148853452	0.0108569145
382	CD13	0	0.686813187	0.5676757691	0.1589210663
396	CD13	0	0.254945055	0.4352165615	0.0051754043
399	CD13	1	0.832967033	0.6610576088	0.377543379
434	CD13	1	0.971428571	0.7040988189	0.1120937235
455	CD13	0	0.3	0.3430096917	-0.0662019113
466	CD13	0	0.585714286	0.4875423457	0.2785059214
468	CD13	0	0.204395604	0.3966389342	-0.1072416302
481	CD13	1	0.97032967	0.7272135242	0.5020977808
499	CD13	1	0.817582418	0.6527396529	0.2373180921
508	CD13	0	0.356043956	0.5324499042	0.0396819196
530	CD13	0	0.43956044	0.5162090171	0.3453486166
532	CD13	1	0.843956044	0.6655728196	0.4732906634
588	CD13	0	0.032967033	0.2046957297	0.1779344473
599	CD13	0	0.442857143	0.4475330398	0.0227729419
603	CD13	0	0.605494505	0.5546737522	0.206178328
607	CD13	1	0.946153846	0.6358253705	0.3200001322
644	CD13	0	0.315384615	0.5367359624	0.2625488244
646	CD13	0	0.453846154	0.6055492512	0.3148427952
659	CD13	0	0.364835165	0.4767249673	0.1620709524
663	CD13	1	0.904395604	0.796768998	0.4403998573
685	CD13	0	0.096703297	0.5568994028	0.1535257136
703	CD13	1	0.906593407	0.5943680071	0.2328512078
709	CD13	0	0.52967033	0.5934264417	0.2505333684
732	CD13	0	0.048351648	0.4429243249	-0.0638169981
734	CD13	0	0.608791209	0.6329857965	0.1796003549
737	CD13	0	0.462637363	0.5149389513	-0.0482616489
744	CD13	0	0.303296703	0.3989063208	0.4985076055
768	CD13	0	0.181318681	0.3578213926	-0.0472065219
808	CD13	0	0.038461538	0.4320247746	0.1734513651
819	CD13	0	0.417582418	0.5080526963	0.0390276257
841	CD13	0	0.596703297	0.567788499	0.3301018522
842	CD13	0	0.603296703	0.4957360442	0.3963226078
907	CD13	0	0.020879121	0.3729125081	0.0830753866
931	CD13	0	0.786813187	0.5023909211	0.0432459867
940	CD13	0	0.42967033	0.4337085128	0.0998737428
959	CD13	1	0.916483516	0.7705754466	0.3780389461
977	CD13	1	0.924175824	0.5216945773	0.683663494
984	CD13	0	0.542857143	0.4655265044	0.1181748263
1014	CD13	0	0.796703297	0.5626298079	0.2927070203
1015	CD13	0	0.227472527	0.5155860941	0.086993258
1024	CD13	0	0.126373626	0.4711921387	0.0567144958
1027	CD13	0	0.416483516	0.4513445368	0.1758198778
1038	CD13	0	0.062637363	0.4960640621	0.06611056
1052	CD13	0	0.661538462	0.4621635741	0.1079560983
1054	CD13	0	0.094505495	0.4260515099	0.1156113249
1071	CD13	0	0.68021978	0.5897954345	0.3114329384
1072	CD13	0	0.325274725	0.4193577248	-0.0820640047
1093	CD13	0	0.298901099	0.4125207604	0.1804798256
1148	CD13	0	0.321978022	0.4876938523	-0.0583888752
1182	CD13	0	0.049450549	0.4737162718	0.0139011661
1183	CD13	0	0.525274725	0.5812728969	0.1194405994
1221	CD13	0	0.584615385	0.5776256224	0.3448981135
1228	CD13	0	0.337362637	0.5554027096	0.3117840521
1272	CD13	0	0.781318681	0.5529296014	0.0441120964
1274	CD13	0	0.479120879	0.6765046946	0.3414717301
1282	CD13	0	0.074725275	0.351853546	-0.1505410128
1283	CD13	0	0.645054945	0.6110157079	0.1075900612
1285	CD13	0	0.567032967	0.4893653078	0.0196131613
1289	CD13	0	0.598901099	0.5607239692	-0.0083851413
1297	CD13	0	0.276923077	0.4674675523	-0.1076460306
1308	CD13	0	0.552747253	0.487742633	0.2311595854
1314	CD13	0	0.452747253	0.4124725969	-0.007637309
1323	CD13	0	0.142857143	0.3595632795	-0.0597736291
1324	CD13	0	0.091208791	0.3966338926	0.1126145539
1325	CD13	0	0.057142857	0.382959306	-0.100492864
1345	CD13	0	0.431868132	0.5232967539	0.0293815799
1351	CD13	0	0.134065934	0.4490339236	-0.0988780591
1361	CD13	0	0.771428571	0.6069951235	-0.1349676933
1366	CD13	0	0.240659341	0.4187575749	0.2405088088
1368	CD13	1	0.950549451	0.68494513	0.2971558078
1372	CD13	0	0.556043956	0.5134211611	0.0638131312
1374	CD13	0	0.710989011	0.6984376452	0.1571316989
1377	CD13	0	0.643956044	0.7042629319	0.4378149521
1393	CD13	0	0.710989011	0.539532	0.0463274343
1402	CD13	0	0.302197802	0.4482065937	-0.0612039535
1406	CD13	0	0.504395604	0.5786273506	0.0801687391
1413	CD13	0	0.349450549	0.4140180598	-0.0701518837
1446	CD13	0	0.196703297	0.4010020031	0.1681821894
1453	CD13	0	0.738461538	0.6574984458	0.1645336508
1459	CD13	0	0.701098901	0.5097116817	0.1489713398
1475	CD13	0	0.298901099	0.5672978932	0.2803177504
1491	CD13	0	0.375824176	0.3807221976	-0.0381888915
1500	CD13	0	0.772527473	0.5333439561	-0.0587240426
1508	CD13	1	0.946153846	0.7518685014	0.3698922622
1509	CD13	1	0.903296703	0.702121299	0.5674914702
1549	CD13	0	0.705494505	0.4500914606	0.2818005422
1550	CD13	0	0.324175824	0.349543689	0.0493092201
1574	CD13	0	0.7	0.54952996	0.4007333302
1578	CD13	0	0.723076923	0.6030254939	-0.0026585345
1582	CD13	0	0.496703297	0.6500115797	0.1186316383
1602	CD13	1	0.917582418	0.6217646761	0.2907083347
1611	CD13	0	0.446153846	0.5575360999	0.299733277
1613	CD13	0	0.368131868	0.5679450677	0.1472429025
1631	CD13	0	0.420879121	0.4427315706	0.0452505189
1635	CD13	0	0.357142857	0.5448382257	0.1599211389
1636	CD13	0	0.357142857	0.5669970918	0.4714513874
1650	CD13	0	0.556043956	0.5638128478	-0.0949484454
1659	CD13	0	0.238461538	0.3074517214	0.2011851708
1663	CD13	0	0.717582418	0.5844460915	0.0997114185
1686	CD13	1	0.934065934	0.674325387	0.3021618073
1713	CD13	0	0.776923077	0.487123358	0.0737213639
1732	CD13	0	0.773626374	0.6093735278	0.3845361829
1747	CD13	0	0.128571429	0.4569858268	0.0417938912
1753	CD13	1	0.878021978	0.5879685496	0.1887841705
1755	CD13	0	0.123076923	0.2335187567	0.0612385193
1774	CD13	0	0.125274725	0.3842492112	-0.1095344726
1794	CD13	0	0.131868132	0.4847810265	-0.0856653234
1802	CD13	0	0.07032967	0.3491762008	-0.0160321827
1806	CD13	0	0.701098901	0.6689707115	0.3846745218
1813	CD13	0	0.736263736	0.5004814644	-0.1211742969
1820	CD13	0	0.46043956	0.5141283396	0.0191293324
1826	CD13	0	0.124175824	0.4298175104	0.1025852961
1830	CD13	0	0.076923077	0.303916528	-0.071588679
1855	CD13	0	0.69010989	0.4504706819	-0.1345109131
1857	CD13	0	0.40989011	0.34526151	-0.1201742771
1861	CD13	0	0.48021978	0.3377046446	-0.1946851468
1866	CD13	0	0.16043956	0.573736984	0.0014351673
1872	CD13	0	0.796703297	0.483742947	0.0388969485
1886	CD13	0	0.413186813	0.5473677462	0.2288405186
1902	CD13	1	0.901098901	0.570895415	0.1918701968
1904	CD13	0	0.618681319	0.7490140676	0.3445682504
1908	CD13	0	0.483516484	0.586124548	-0.1096198982
1911	CD13	0	0.089010989	0.505277089	0.1685840857
1937	CD13	0	0.589010989	0.3848858724	0.0934152192
1952	CD13	0	0.674725275	0.5451075326	0.1631044018
1955	CD13	0	0.208791209	0.1519828808	0.0096607258
1972	CD13	0	0.058241758	0.4628924203	0.1116619851
1983	CD13	0	0.735164835	0.6990486332	0.3093444191
2000	CD13	0	0.478021978	0.5277381715	-0.1044093332
2008	CD13	1	0.878021978	0.7196646687	0.2313537748
2019	CD13	0	0.492307692	0.6072186407	0.0441724918
2025	CD13	0	0.369230769	0.3001505815	0.0214017748
2026	CD13	0	0.674725275	0.5613707447	-0.1278543653
2031	CD13	0	0.618681319	0.5849976766	0.3059749326
2043	CD13	0	0.637362637	0.5495946909	0.2613641368
2057	CD13	1	0.832967033	0.6867260176	0.2052344968
2060	CD13	0	0.567032967	0.5166731036	0.2246128975
2072	CD13	0	0.024175824	0.5977021556	0.3468093483
2086	CD13	0	0.263736264	0.4873472279	0.1527674874
2090	CD13	0	0.046153846	0.2719387564	0.0051014175
2092	CD13	0	0.176923077	0.4176058526	-0.0336841424
2093	CD13	0	0.117582418	0.5056259004	0.2800937405
2096	CD13	0	0.104395604	0.277119219	0.0463273332
2097	CD13	0	0.697802198	0.6795128609	0.2060586133
2112	CD13	0	0.198901099	0.479891737	-0.2138238801
2117	CD13	0	0.128571429	0.4794625167	0.152888129
2124	CD13	0	0.392307692	0.5400484657	0.3713888131
2132	CD13	0	0.254945055	0.6025353599	0.2338314728
2145	CD13	0	0.09010989	0.418543527	0.3287093388
2153	CD13	1	0.82967033	0.6307840388	0.4243054999
2156	CD13	1	0.812087912	0.6263489378	0.6067206883
2172	CD13	0	0.432967033	0.5593496077	0.0389937255
2178	CD13	0	0.716483516	0.5400102086	0.1446745074
2181	CD13	0	0.636263736	0.6665907712	0.4733093822
2186	CD13	0	0.671428571	0.4766524318	0.0213265746
2190	CD13	0	0.527472527	0.6053965688	0.0550693201
2191	CD13	0	0.48021978	0.532209432	0.3552768192
2197	CD13	1	0.847252747	0.6960827935	0.2155734507
2198	CD13	0	0.127472527	0.3339576439	0.0886231827
2207	CD13	1	0.874725275	0.7507233727	0.2019496218
2208	CD13	1	0.906593407	0.5927012341	0.5404471996
2222	CD13	0	0.795604396	0.6808397668	0.2455501804
2232	CD13	0	0.73956044	0.7601914986	0.3164391493
2240	CD13	1	0.896703297	0.4866560767	0.3420903614
2268	CD13	0	0.581318681	0.5988553468	0.3267637957
2281	CD13	1	0.935164835	0.5141943723	0.265187876
2287	CD13	0	0.693406593	0.5902588774	0.0884966978
2288	CD13	0	0.457142857	0.5759421227	0.0848412971
2297	CD13	0	0.213186813	0.5640882106	-0.0288433375
2312	CD13	0	0.39010989	0.4828000547	-0.1462665766
2316	CD13	0	0.105494505	0.3810305748	-0.0454297383
2337	CD13	0	0.498901099	0.6124398774	0.4677557582
2340	CD13	0	0.097802198	0.4536777135	0.0006685119
2370	CD13	0	0.774725275	0.409987282	-0.1708006589
2389	CD13	0	0.347252747	0.4771919039	0.256189817
2401	CD13	0	0.345054945	0.5330015024	0.054376733
2421	CD13	0	0.640659341	0.6967540786	0.2495222502
2422	CD13	0	0.158241758	0.4096035357	0.0003925299
2423	CD13	0	0.474725275	0.6003382617	0.104140941
2431	CD13	0	0.496703297	0.444645829	0.108874745
2436	CD13	0	0.115384615	0.2735119672	0.1644555126
2444	CD13	0	0.324175824	0.4633191915	0.1852821225
2455	CD13	0	0.564835165	0.6379744074	0.295381178
2457	CD13	0	0.358241758	0.491635578	0.1376887787
2467	CD13	0	0.508791209	0.6186896031	0.4029026608
2471	CD13	0	0.326373626	0.4945202393	0.0711241209
2489	CD13	0	0.420879121	0.5651743236	0.1211996402
2490	CD13	0	0.675824176	0.6685115051	0.3215218121
2543	CD13	0	0.696703297	0.5596678802	0.1113604351
2552	CD13	0	0.31978022	0.5157724646	0.2292642117
2558	CD13	0	0.567032967	0.5478941283	0.0465936664
2561	CD13	0	0.516483516	0.5056730007	0.1197165165
2563	CD13	0	0.378021978	0.4550507552	-0.2296360135
2583	CD13	0	0.68021978	0.5677022595	0.1481032033
2595	CD13	0	0.124175824	0.4107764715	0.0884599668
2609	CD13	0	0.103296703	0.4376029036	0.1577316835
2634	CD13	0	0.57032967	0.5717703626	0.1395839631
2644	CD13	0	0.516483516	0.5177537273	0.1944199097
2647	CD13	0	0.506593407	0.5601835392	0.1553598835
2651	CD13	0	0.496703297	0.7330245524	0.175783803
2670	CD13	0	0.158241758	0.4310863504	0.245868121
2684	CD13	1	0.963736264	0.6796134489	0.287242602
2696	CD13	0	0.798901099	0.5834811104	0.2178158187
2700	CD13	0	0.045054945	0.4797176016	0.0380242838
2706	CD13	0	0.198901099	0.3710743534	-0.108460998
2710	CD13	0	0.554945055	0.6506888584	0.1543000868
2712	CD13	0	0.721978022	0.6873722088	0.5483164049
2715	CD13	0	0.5	0.6391404967	0.1963560015
2725	CD13	0	0.071428571	0.2433215454	-0.0015189288
2730	CD13	0	0.683516484	0.5136084521	0.1637586002
2731	CD13	0	0.304395604	0.2115223438	0.0673340205
2754	CD13	0	0.063736264	0.1312993754	0.2214607261
2756	CD13	0	0.037362637	0.3116511511	0.0384141571
2757	CD13	1	0.93956044	0.5967766967	0.4324738732
2770	CD13	0	0.389010989	0.3888156827	0.3302918872
2775	CD13	0	0.593406593	0.4034475564	0.2517060782
2794	CD13	1	0.971428571	0.6982993182	0.4704352079
2798	CD13	0	0.430769231	0.5345948511	0.2909549247
2809	CD13	0	0.554945055	0.6047421775	0.0942630053
2811	CD13	0	0.659340659	0.5933144293	0.1440002979
2835	CD13	0	0.621978022	0.5123282574	0.2795431025
2840	CD13	0	0.520879121	0.5964810518	0.3593243534
2859	CD13	0	0.476923077	0.5734804171	0.1720462545
2877	CD13	0	0.040659341	0.3198599836	0.0994465121
2879	CD13	0	0.486813187	0.5649190173	0.2071975157
2880	CD13	0	0.706593407	0.6588136828	0.2230183999
2886	CD13	0	0.779120879	0.6696950024	0.2554281592
2929	CD13	1	0.967032967	0.7351997197	0.3707052014
2932	CD13	0	0.761538462	0.620684694	0.1038483858
2933	CD13	0	0.361538462	0.5239458341	0.3651348212
2935	CD13	0	0.369230769	0.6201129732	0.2119955702
2940	CD13	0	0.446153846	0.381179888	-0.044643074
2941	CD13	0	0.712087912	0.548312643	0.32708654
2964	CD13	1	0.813186813	0.4245187502	0.2459401297
3005	CD13	0	0.687912088	0.5092318021	0.1354058859
3047	CD13	0	0.47032967	0.5118719341	0.3333564078
3053	CD13	0	0.347252747	0.5425112317	0.2308594667
3062	CD13	0	0.140659341	0.4905200561	0.1381869551
3063	CD13	0	0.172527473	0.3396372938	0.067181589
3080	CD13	0	0.264835165	0.4605483666	-0.0855071656
3103	CD13	0	0.749450549	0.4993183051	0.1738057057
3131	CD13	0	0.752747253	0.6489070495	0.5005824827
3147	CD13	1	0.831868132	0.7529618762	0.2810697462
3157	CD13	0	0.654945055	0.6007697853	0.2256289809
3163	CD13	0	0.428571429	0.5848438589	-0.023939616
3219	CD13	1	0.969230769	0.6520325833	0.5824610809
3233	CD13	0	0.224175824	0.5219032561	0.0958691902
3245	CD13	0	0.441758242	0.6163932294	0.0886193823
3247	CD13	1	0.925274725	0.6760021117	0.6235888317
3249	CD13	1	0.901098901	0.7288836934	0.4512892232
3255	CD13	1	0.874725275	0.6373307545	0.4058731806
3260	CD13	0	0.683516484	0.6588607131	0.3657556482
3279	CD13	0	0.014285714	0.2837738379	0.0628197327
3334	CD13	1	0.803296703	0.6022330236	0.3771229355
3356	CD13	0	0.659340659	0.7188962512	0.1982850002
3365	CD13	0	0.241758242	0.6608120043	0.2236414325
3371	CD13	0	0.264835165	0.2631392134	0.0242962741
3375	CD13	0	0.32967033	0.4719084446	0.4090427685
3385	CD13	0	0.107692308	0.2732840427	-0.0475026593
3386	CD13	0	0.618681319	0.6622177033	0.2660376007
3396	CD13	0	0.124175824	0.3787403873	0.2554828897
3399	CD13	0	0.510989011	0.5053193242	-0.0209697706
3407	CD13	0	0.108791209	0.6903283266	0.4400068378
3411	CD13	0	0.173626374	0.5372413191	0.333506982
3415	CD13	1	0.984615385	0.7571440641	0.300499078
3419	CD13	0	0.42967033	0.5132417461	0.0523847154
3423	CD13	0	0.454945055	0.4429733186	0.1716886669
3429	CD13	0	0.465934066	0.4934106146	0.0382664739
3450	CD13	0	0.504395604	0.6700654793	0.3673848141
3465	CD13	0	0.187912088	0.3008953736	0.3108078622
3504	CD13	0	0.22967033	0.4005671266	0.057357837
3514	CD13	0	0.263736264	0.4580494953	0.2644333641
3526	CD13	0	0.110989011	0.5198491117	0.1599872914
3530	CD13	0	0.065934066	0.5326915838	-0.0407566825
3534	CD13	0	0.523076923	0.5604723314	-0.0276247242
3537	CD13	0	0.307692308	0.3598667501	-0.0077565275
3539	CD13	1	0.812087912	0.6837566227	0.3563439796
3546	CD13	1	0.808791209	0.6297912243	0.6312701527
3553	CD13	0	0.026373626	0.4361117606	0.0802539079
3566	CD13	0	0.158241758	0.3660066439	-0.1321299886
3567	CD13	0	0.503296703	0.5758059215	0.2157007662
3568	CD13	1	0.889010989	0.6067534387	0.2442933172
3569	CD13	0	0.768131868	0.5378771963	0.1887744469
3570	CD13	0	0.301098901	0.4602726178	-0.0594684905
3591	CD13	0	0.20989011	0.3020177226	0.0993443915
3595	CD13	0	0.440659341	0.5105362017	0.217511272
3629	CD13	0	0.674725275	0.6706656943	0.2030578994
3640	CD13	0	0.472527473	0.6478215998	0.1859588357
3648	CD13	0	0.02967033	0.3300762076	0.2769478006
3663	CD13	0	0.254945055	0.4128125761	0.005151339
3669	CD13	0	0.795604396	0.6305015936	0.0058308874
3671	CD13	1	0.847252747	0.7524588749	0.083758068
3690	CD13	0	0.310989011	0.462573678	0.0218418841
3696	CD13	0	0.416483516	0.4656828001	0.2443481269
3706	CD13	0	0.050549451	0.3699535694	0.2159243674
3707	CD13	0	0.362637363	0.4415365757	0.4945224444
3724	CD13	0	0.51978022	0.474534341	0.1892165129
3730	CD13	1	0.850549451	0.5961651405	0.5244173205
3732	CD13	1	0.823076923	0.5998518623	0.6101470886
3737	CD13	0	0.274725275	0.4443993432	0.0695147048
3761	CD13	0	0.214285714	0.5269270092	0.1406784652
3772	CD13	0	0.479120879	0.5140493037	-0.0434838555
3774	CD13	1	0.954945055	0.7149668067	0.2910901412
3775	CD13	0	0.47032967	0.59065388	0.0825662567
3776	CD13	0	0.142857143	0.3753987131	-0.0151677456
3779	CD13	0	0.338461538	0.4772654719	0.1223747494
3791	CD13	0	0.256043956	0.3960389211	-0.142717522
3792	CD13	0	0.313186813	0.358426256	0.035860964
3807	CD13	0	0.282417582	0.4285359436	0.3108434207
3830	CD13	0	0.759340659	0.6880516037	0.268744456
3834	CD13	0	0.404395604	0.6150530808	0.2337080805
3835	CD13	0	0.558241758	0.7278936838	0.4809700334
3836	CD13	0	0.537362637	0.5807033902	0.3090351196
3837	CD13	1	0.843956044	0.6291534918	0.3157070201
3845	CD13	1	0.873626374	0.6202328261	0.7522988953
3852	CD13	1	0.931868132	0.702922798	0.3890602138
3856	CD13	0	0.612087912	0.6602591116	0.3047285108
3869	CD13	0	0.479120879	0.5100009399	0.0003395987
3870	CD13	0	0.524175824	0.565535336	0.0641891083
3897	CD13	0	0.304395604	0.4764478405	0.2688681492
3909	CD13	0	0.20989011	0.401896511	0.0382601176
3916	CD13	0	0.18021978	0.5404205921	0.2207087927
3918	CD13	0	0.423076923	0.6117852497	0.3048990658
3925	CD13	1	0.821978022	0.5804919456	0.4670559119
3938	CD13	0	0.706593407	0.5547386908	-0.0836978044
3946	CD13	0	0.172527473	0.2184017242	0.0233297749
3964	CD13	0	0.68021978	0.6624228279	0.2066582178
3969	CD13	1	0.958241758	0.7485818276	0.4650616756
3994	CD13	1	0.889010989	0.6259582794	0.218265187
3995	CD13	0	0.784615385	0.6888430105	0.2525196795
3996	CD13	0	0.328571429	0.2892030655	0.216021553
4016	CD13	0	0.584615385	0.5640787605	-0.0880383445
4058	CD13	1	0.978021978	0.7414628816	0.3553941223
4062	CD13	0	0.702197802	0.5791580255	0.0232803888
4075	CD13	0	0.640659341	0.4801537317	-0.0122396581
4082	CD13	0	0.672527473	0.4397485876	0.2239188692
4085	CD13	1	0.881318681	0.4352282645	0.4139947279
4090	CD13	0	0.615384615	0.61598474	0.1565516403
4100	CD13	0	0.182417582	0.3743619663	-0.1193210646
4102	CD13	0	0.661538462	0.5197189197	0.1344289161
4133	CD13	0	0.189010989	0.5411473881	0.2560693114
4175	CD13	0	0.618681319	0.6705237269	0.0598238496
4178	CD13	0	0.705494505	0.7112644182	0.2513044014
4186	CD13	0	0.317582418	0.649399499	0.1337038103
4193	CD13	0	0.107692308	0.5146393868	-0.0362358346
4205	CD13	0	0.084615385	0.4912266345	-0.0447268669
4209	CD13	0	0.473626374	0.6148156372	0.2910275027
4218	CD13	0	0.449450549	0.3021439016	0.6227473686
4224	CD13	1	0.978021978	0.7599705727	0.1253829765
4268	CD13	0	0.201098901	0.3984286387	0.3373368668
4292	CD13	0	0.682417582	0.5915142688	0.2245359598
4301	CD13	1	0.842857143	0.7601657111	0.397269094
4308	CD13	0	0.328571429	0.47709121	0.3190743406
4323	CD13	1	0.93956044	0.7848821601	0.3805126906
4329	CD13	0	0.527472527	0.530448544	-0.1561275994
4331	CD13	0	0.381318681	0.4263448973	0.0491053187
4335	CD13	1	0.908791209	0.611465973	0.5793989497
4344	CD13	1	0.938461538	0.6692005349	0.2323873703
4363	CD13	1	0.886813187	0.6902960153	0.2401535753
4390	CD13	1	0.942857143	0.6724783156	0.7045435043
4392	CD13	0	0.107692308	0.3202753344	0.0057750105
4393	CD13	0	0.047252747	0.3419698349	0.0404219895
4396	CD13	0	0.63956044	0.6274437276	0.1559712247
4429	CD13	0	0.771428571	0.5117709055	0.1665121163
4450	CD13	0	0.293406593	0.6679797191	0.5531552562
4451	CD13	1	0.895604396	0.6041778605	0.2345071009
4474	CD13	1	0.864835165	0.4377751482	0.2576997896
4541	CD13	0	0.181318681	0.432245405	-0.0871857368
4546	CD13	1	0.82967033	0.6235739862	0.0369375149
4548	CD13	1	0.876923077	0.6199900807	0.7029216093
4559	CD13	0	0.334065934	0.5261069365	0.1210882295
4564	CD13	0	0.263736264	0.3749097262	0.2960400447
4571	CD13	0	0.764835165	0.6730228042	0.320367449
4579	CD13	1	0.904395604	0.677912632	0.3457250677
4587	CD13	0	0.275824176	0.4191174054	-0.0116729691
4594	CD13	0	0.054945055	0.3202667489	-0.0896234306
4596	CD13	0	0.079120879	0.6021587681	0.6285321389
4614	CD13	0	0.793406593	0.4965762006	0.1412501746
4624	CD13	0	0.548351648	0.3828527628	-0.0628588041
4626	CD13	0	0.182417582	0.3822893541	-0.1967192617
4636	CD13	1	0.871428571	0.5489910333	0.2067024386
4638	CD13	0	0.720879121	0.6774965962	0.4420258887
4654	CD13	0	0.38021978	0.5572006409	0.0171555421
4674	CD13	0	0.231868132	0.353866135	0.0230411306
4690	CD13	0	0.401098901	0.5639967122	-0.1409032294
4697	CD13	0	0.672527473	0.6414100388	0.1113951381
4703	CD13	0	0.664835165	0.538655719	0.2960643286
4705	CD13	1	0.930769231	0.6515783758	0.431473566
4706	CD13	1	0.842857143	0.6014233702	0.4163173134
4713	CD13	0	0.771428571	0.6209862981	0.0077259634
4721	CD13	0	0.781318681	0.445871062	0.0129186072
4737	CD13	0	0.751648352	0.6189655243	0.3145053136
4739	CD13	0	0.547252747	0.6706347583	0.3936083789
4764	CD13	0	0.651648352	0.5156182567	-0.2070710839
4767	CD13	0	0.585714286	0.5831562726	0.072820978
4769	CD13	0	0.628571429	0.6335735917	0.0429625841
4777	CD13	0	0.310989011	0.4720185987	0.1720668134
4791	CD13	0	0.698901099	0.5895871305	0.2809962643
4814	CD13	1	0.861538462	0.5287403925	0.3542372997
4819	CD13	0	0.356043956	0.6204847771	0.3604111827
4834	CD13	0	0.025274725	0.6227448607	0.2284190437
4865	CD13	0	0.321978022	0.4264181082	0.1296394758
4868	CD13	1	0.969230769	0.5842074817	0.2510783229
4872	CD13	0	0.124175824	0.4863221379	0.3512916791
4878	CD13	0	0.154945055	0.3384674675	0.1307593054
4889	CD13	1	0.974725275	0.6927907812	0.5472651445
4896	CD13	0	0.343956044	0.3186263345	0.0955505628
4914	CD13	1	0.824175824	0.7325343228	0.5338249664
4930	CD13	1	0.842857143	0.5809985049	0.6308776027
4938	CD13	0	0.482417582	0.5592150912	0.1509373649
4939	CD13	0	0.104395604	0.3434395581	0.1219714003
4959	CD13	0	0.728571429	0.4534348611	0.0662286701
4964	CD13	0	0.686813187	0.6302433162	0.0098358817
4968	CD13	0	0.537362637	0.6272899538	0.0681570696
4994	CD13	0	0.678021978	0.4970533353	-0.1376508198
4995	CD13	0	0.471428571	0.341200812	0.2603878775
5009	CD13	1	0.97032967	0.6294590392	0.2035941835
5024	CD13	1	0.86043956	0.6383344179	0.2668249492
5031	CD13	0	0.51978022	0.7399441535	0.2723139496
5035	CD13	0	0.114285714	0.3245851209	-0.138693158
5118	CD13	0	0.108791209	0.3536479913	0.0579030039
5135	CD13	0	0.257142857	0.4376726056	0.1256393205
5150	CD13	0	0.50989011	0.4482997574	0.261811428
5166	CD13	0	0.148351648	0.4404215077	-0.1568106376
5189	CD13	0	0.745054945	0.5155822315	0.2282500329
5223	CD13	0	0.527472527	0.6161573436	0.0624039785
5243	CD13	0	0.118681319	0.5358892405	0.0632166196
5247	CD13	0	0.304395604	0.3991371605	0.3115407081
5267	CD13	0	0.207692308	0.3987697406	-0.2421319031
5278	CD13	0	0.389010989	0.5567584536	-0.1390454826
5294	CD13	0	0.658241758	0.6218346017	-0.0013916484
5300	CD13	0	0.121978022	0.3387235582	-0.0181476705
5303	CD13	0	0.724175824	0.5459614016	0.0743270053
158	CD15	0	0.597069597	0.5413139522	0.4197429819
162	CD15	0	0.688644689	0.6558550538	0.0508020654
167	CD15	0	0.582417582	0.5845149949	0.1193781272
193	CD15	0	0.564102564	0.4579991598	0.1164510677
249	CD15	0	0.791208791	0.6996437257	0.1028821666
284	CD15	0	0.725274725	0.6518811447	0.2016016016
323	CD15	0	0.377289377	0.4645988588	-0.1625570263
375	CD15	0	0.736263736	0.6358113641	0.140522732
418	CD15	1	0.882783883	0.494361449	0.0172237028
419	CD15	0	0.406593407	0.4986283308	-0.013369583
426	CD15	0	0.487179487	0.4601766435	0.0772900073
456	CD15	1	0.908424908	0.6723832949	0.4187442622
471	CD15	1	0.996336996	0.6432331854	0.3454860298
513	CD15	1	0.963369963	0.7220038704	0.6263001847
528	CD15	0	0.509157509	0.4062038063	0.2364684941
533	CD15	1	0.868131868	0.553063705	0.3842740864
593	CD15	0	0.054945055	0.3636035349	0.3366877379
598	CD15	0	0.435897436	0.5967951225	-0.0567999965
664	CD15	0	0.476190476	0.4994467618	0.3495730829
696	CD15	0	0.333333333	0.5625968553	0.2180162093
707	CD15	1	0.923076923	0.6494957627	0.169213855
730	CD15	0	0.575091575	0.4546143902	0.0332898639
733	CD15	0	0.43956044	0.4460145082	0.0197460215
770	CD15	0	0.534798535	0.4690794831	-0.2271724754
777	CD15	1	0.919413919	0.68497916	-0.0483691842
782	CD15	0	0.113553114	0.4528252007	-0.1729593701
807	CD15	0	0.611721612	0.4687470885	0.1048436662
810	CD15	0	0.029304029	0.1741227789	-0.0046712725
867	CD15	0	0.743589744	0.6140251824	0.6572373355
888	CD15	1	0.827838828	0.6857128666	0.5256490332
890	CD15	0	0.578754579	0.5703576558	0.2134255675
913	CD15	0	0.512820513	0.5192965207	-0.0081545245
921	CD15	0	0.527472527	0.4645288322	0.1234495975
929	CD15	0	0.703296703	0.5809946426	0.0594370403
936	CD15	0	0.249084249	0.4959962585	-0.0540489972
990	CD15	0	0.065934066	0.3477026842	-0.1250244453
1067	CD15	0	0.498168498	0.6154117052	0.6903867598
1146	CD15	0	0.10989011	0.4028123011	0.0695977658
1160	CD15	1	0.967032967	0.6484942742	0.414616058
1161	CD15	1	0.89010989	0.5829691996	0.6174055811
1168	CD15	0	0.490842491	0.5667942395	0.2767468496
1181	CD15	0	0.516483516	0.5221618972	0.0829291097
1186	CD15	1	0.934065934	0.5492579459	0.3556982276
1256	CD15	1	0.893772894	0.6366351693	0.3307917095
1262	CD15	0	0.721611722	0.5046570435	0.1496430695
1280	CD15	0	0.58974359	0.4960525015	0.4087269334
1302	CD15	0	0.384615385	0.5826248932	-0.0327628249
1303	CD15	0	0.256410256	0.6011684693	0.1360841257
1306	CD15	1	0.875457875	0.7121703539	0.2570209216
1311	CD15	0	0.747252747	0.449221626	-0.0147817305
1328	CD15	1	0.948717949	0.6170791697	0.4158199375
1396	CD15	0	0.395604396	0.5943863226	0.2664439951
1397	CD15	0	0.025641026	0.1617317734	-0.1886506416
1401	CD15	0	0.274725275	0.4291591005	-0.0480293095
1412	CD15	0	0.769230769	0.6165344098	0.1433670361
1435	CD15	0	0.117216117	0.3514236404	0.038380296
1438	CD15	0	0.296703297	0.2644756958	-0.1185882912
1445	CD15	0	0.223443223	0.3993508212	0.0488820488
1452	CD15	0	0.388278388	0.4751580471	-0.048139842
1477	CD15	0	0.351648352	0.4918329302	-0.0526367125
1515	CD15	0	0.32967033	0.5815850632	0.2333463592
1572	CD15	0	0.304029304	0.4807014158	0.3119623728
1593	CD15	0	0.717948718	0.5327316652	0.2514680175
1599	CD15	1	0.842490842	0.6138557732	0.7941394688
1609	CD15	1	0.985347985	0.4503745583	0.3582741035
1623	CD15	1	0.838827839	0.5520241867	0.5775008988
1640	CD15	1	0.956043956	0.5558111286	0.2901459593
1679	CD15	0	0.014652015	0.1389509496	-0.0417223926
1689	CD15	0	0.076923077	0.2328548673	-0.1340668926
1691	CD15	0	0.641025641	0.612024413	-0.058723552
1698	CD15	0	0.417582418	0.3186921655	0.1327441478
1735	CD15	0	0.461538462	0.5227018531	0.3696935593
1748	CD15	0	0.622710623	0.2595189693	-0.0620853117
1777	CD15	0	0.047619048	0.2047829792	-0.055893595
1790	CD15	0	0.318681319	0.2451735322	-0.0116249775
1793	CD15	0	0.164835165	0.2223575172	-0.2553308779
1796	CD15	1	0.813186813	0.3722307389	0.0295652731
1811	CD15	0	0.604395604	0.5355753784	0.339322967
1814	CD15	0	0.761904762	0.3510943264	-0.1564477466
1843	CD15	0	0.402930403	0.5052936918	0.1392909906
1844	CD15	1	0.860805861	0.510751883	0.1886635038
1858	CD15	1	0.897435897	0.5533592647	0.2239388191
1864	CD15	0	0.750915751	0.5720380934	0.3291047668
1878	CD15	0	0.428571429	0.3574331296	-0.0362687716
1881	CD15	0	0.124542125	0.2137617426	-0.0358760293
1909	CD15	0	0.267399267	0.3925083712	-0.0856609232
1912	CD15	0	0.032967033	0.3060008878	-0.1423417631
1974	CD15	1	0.93040293	0.556787908	0.1039233506
1989	CD15	0	0.450549451	0.3775800814	-0.0187082491
2001	CD15	0	0.783882784	0.4786584643	-0.2299236818
2033	CD15	1	0.901098901	0.7237094049	0.2641926401
2035	CD15	0	0.010989011	0.3961085142	0.2966786257
2036	CD15	0	0.593406593	0.4551076833	0.2432439293
2049	CD15	0	0.424908425	0.4890528654	0.1200320283
2055	CD15	1	0.831501832	0.4506812468	0.0674195937
2062	CD15	0	0.358974359	0.4442361111	0.0614048951
2080	CD15	1	0.80952381	0.5007235149	0.1531487756
2081	CD15	0	0.457875458	0.4742592521	-0.0028706422
2085	CD15	1	0.941391941	0.6815078199	0.0518774341
2087	CD15	0	0.344322344	0.3499648178	0.3342248938
2089	CD15	0	0.179487179	0.2710521474	-0.087470556
2094	CD15	0	0.663003663	0.6176693902	0.2330326984
2098	CD15	0	0.084249084	0.2995978537	0.0067998924
2101	CD15	0	0.542124542	0.627270397	0.7461356196
2106	CD15	0	0.161172161	0.1269929226	-0.0796929218
2110	CD15	1	1	0.4674882895	0.4114405529
2111	CD15	0	0.139194139	0.309079931	-0.0009652023
2116	CD15	0	0.06959707	0.2656219033	-0.027105835
2119	CD15	0	0.285714286	0.2280785314	0.105662296
2122	CD15	0	0.19047619	0.4656415585	0.1680601175
2141	CD15	0	0.021978022	0.1623196568	-0.1300725121
2148	CD15	0	0.153846154	0.3048701882	0.0302761945
2149	CD15	0	0.205128205	0.2071444122	-0.0373118331
2151	CD15	0	0.098901099	0.2831034541	0.1455129964
2158	CD15	0	0.67032967	0.6465574993	0.1151143957
2171	CD15	0	0.78021978	0.5000513908	0.0603660389
2175	CD15	0	0.3003663	0.0707343298	-0.3297673527
2180	CD15	0	0.633699634	0.4634985413	-0.0943432361
2182	CD15	0	0.787545788	0.4340672069	0.1094779728
2187	CD15	0	0.758241758	0.4320426577	-0.0502972296
2206	CD15	0	0.677655678	0.4843493439	0.0328801757
2220	CD15	0	0.421245421	0.2872818819	0.0325246116
2234	CD15	0	0.311355311	0.5047042892	-0.0767248489
2283	CD15	0	0.681318681	0.5252244507	0.1964725892
2317	CD15	0	0.062271062	0.3936581145	-0.1254580727
2353	CD15	0	0.794871795	0.6218207235	0.1706396346
2361	CD15	1	0.912087912	0.653830082	0.4444703266
2395	CD15	0	0.545787546	0.4419179338	-0.0362329306
2397	CD15	0	0.549450549	0.5338846561	0.0402106422
2434	CD15	0	0.252747253	0.2845290059	0.2019600817
2440	CD15	0	0.655677656	0.7944540057	0.5376643243
2447	CD15	0	0.128205128	0.2570605491	-0.0493818306
2460	CD15	1	0.816849817	0.4690736515	0.0840537785
2468	CD15	0	0.505494505	0.5534946985	0.4678822773
2491	CD15	0	0.362637363	0.1871978105	0.038116019
2506	CD15	0	0.732600733	0.5049989432	0.1060537604
2518	CD15	1	0.970695971	0.621928131	0.4347615583
2551	CD15	1	0.879120879	0.4755278304	0.0599647352
2576	CD15	0	0.73992674	0.4585171308	0.4839650543
2622	CD15	0	0.315018315	0.439696673	0.3154562405
2623	CD15	0	0.615384615	0.3886292071	0.2158654695
2680	CD15	0	0.754578755	0.517505413	0.1833560539
2695	CD15	0	0.586080586	0.5016762999	0.2674706871
2698	CD15	0	0.227106227	0.4885239992	0.3795781544
2758	CD15	0	0.63003663	0.5136342744	0.0901886886
2759	CD15	0	0.553113553	0.3911917798	0.0775560974
2761	CD15	0	0.293040293	0.322867542	0.1377351865
2771	CD15	0	0.468864469	0.5061182101	-0.0296786935
2776	CD15	0	0.728937729	0.6187310115	0.0846687458
2822	CD15	0	0.102564103	0.4061770599	0.191631737
2826	CD15	1	0.937728938	0.6632905369	0.4412878477
2850	CD15	0	0.241758242	0.4016731281	0.0570193065
2872	CD15	0	0.666666667	0.4215409947	0.3799149746
2993	CD15	0	0.366300366	0.4183827027	-0.0205664619
3041	CD15	0	0.52014652	0.3844026393	0.0227168375
3066	CD15	0	0.531135531	0.4311255462	0.0250788698
3085	CD15	1	0.802197802	0.4488888451	0.4151753711
3097	CD15	0	0.692307692	0.5845991161	-0.098433367
3104	CD15	0	0.501831502	0.4708026475	-0.1035299325
3116	CD15	0	0.080586081	0.2878626241	0.1005745444
3121	CD15	0	0.278388278	0.4306530758	0.1275296884
3123	CD15	1	0.989010989	0.5777453143	0.6538957662
3126	CD15	1	0.992673993	0.5827489168	0.280665666
3127	CD15	0	0.197802198	0.372422871	0.1217942065
3139	CD15	0	0.56043956	0.3560873058	0.1016377375
3141	CD15	0	0.263736264	0.4556414917	0.5270316597
3144	CD15	1	0.886446886	0.4725407794	0.0048730619
3171	CD15	0	0.340659341	0.4027723727	0.4520685243
3172	CD15	0	0.443223443	0.4450107222	-0.2401484991
3175	CD15	0	0.326007326	0.2907375439	-0.1763304863
3184	CD15	0	0.168498168	0.5690784764	0.2195617063
3192	CD15	0	0.556776557	0.3910656851	0.010871598
3195	CD15	0	0.043956044	0.1469127747	-0.0797642851
3197	CD15	0	0.659340659	0.7697823136	0.3565641985
3198	CD15	0	0.194139194	0.5252374253	0.408334797
3206	CD15	0	0.007326007	0.2227194391	0.0938527578
3211	CD15	1	0.864468864	0.4906635615	0.2615735099
3214	CD15	0	0.36996337	0.3806909061	0.231099991
3252	CD15	0	0.230769231	0.4650925351	0.120299647
3253	CD15	0	0.454212454	0.3851454635	0.2226664141
3256	CD15	0	0.776556777	0.4614770461	0.0363339554
3265	CD15	0	0.684981685	0.4164360335	0.0845827741
3272	CD15	0	0.652014652	0.6561300395	0.6265980453
3273	CD15	0	0.391941392	0.5023422045	0.1588822399
3321	CD15	1	0.835164835	0.5747309487	0.0281059381
3331	CD15	0	0.695970696	0.4885175243	0.0721049008
3347	CD15	0	0.201465201	0.401827315	-0.0155126014
3348	CD15	0	0.380952381	0.3975248317	-0.0352230519
3400	CD15	0	0.472527473	0.6273060662	0.0771646284
3437	CD15	0	0.322344322	0.5812071979	0.1798302036
3483	CD15	0	0.347985348	0.4409661224	0.1258970331
3496	CD15	0	0.120879121	0.3169597753	-0.0925465658
3498	CD15	0	0.04029304	0.2102309656	-0.0574344601
3509	CD15	0	0.131868132	0.1463941617	-0.1096379587
3515	CD15	1	0.981684982	0.5954574642	0.435533206
3532	CD15	0	0.465201465	0.5133175711	-0.0608033827
3538	CD15	0	0.289377289	0.5029011939	0.1224414769
3545	CD15	0	0.15018315	0.3836607245	0.0689238614
3551	CD15	0	0.307692308	0.457185819	0.1283324114
3552	CD15	0	0.608058608	0.35356425	0.098615168
3554	CD15	0	0.091575092	0.301321742	-0.2885898063
3555	CD15	0	0.238095238	0.4849979328	-0.0021545974
3558	CD15	0	0.135531136	0.1971581871	0.0303919264
3559	CD15	0	0.036630037	0.4093352639	0.0404712798
3560	CD15	0	0.571428571	0.5290012287	0.2809263605
3565	CD15	0	0.413919414	0.4742305298	-0.007873182
3576	CD15	0	0.432234432	0.5922346079	0.0552385848
3586	CD15	0	0.183150183	0.3300087666	0.2087219559
3639	CD15	0	0.710622711	0.4989059154	0.1779927509
3642	CD15	0	0.051282051	0.1388524595	0.0085633246
3658	CD15	1	0.857142857	0.6049907915	0.5622897119
3661	CD15	0	0.073260073	0.2997055772	0.3460289892
3668	CD15	0	0.146520147	0.229431762	0.0707126077
3686	CD15	1	0.904761905	0.5005343433	0.5142264269
3691	CD15	0	0.282051282	0.2869328726	0.0378658766
3700	CD15	0	0.003663004	0.6199870799	0.6074611306
3714	CD15	0	0.373626374	0.2876855955	0.2552381416
3735	CD15	0	0.106227106	0.3599711485	-0.0485056163
3752	CD15	0	0.619047619	0.4930557159	0.1617731482
3782	CD15	1	0.84981685	0.577472965	0.2877332582
3812	CD15	1	0.820512821	0.4979121928	0.3491877234
3902	CD15	0	0.772893773	0.5837045531	-0.0995387513
3927	CD15	1	0.871794872	0.5697634712	0.2646326925
3930	CD15	0	0.336996337	0.4229734843	0.1724426929
3931	CD15	1	0.974358974	0.639940958	0.5006036749
3945	CD15	0	0.673992674	0.4022189612	0.030589513
3992	CD15	0	0.6996337	0.5374910015	-0.0741585927
4013	CD15	0	0.21978022	0.3625695298	0.1471824797
4037	CD15	0	0.186813187	0.3147315851	0.1529007701
4038	CD15	1	0.853479853	0.5980431129	0.2117036625
4045	CD15	0	0.157509158	0.1829105881	-0.0524514442
4081	CD15	0	0.706959707	0.3415615024	0.1662503016
4084	CD15	0	0.483516484	0.5803473336	0.3638092884
4089	CD15	0	0.399267399	0.3363968441	0.0575238651
4095	CD15	1	0.824175824	0.4738902188	0.2040508458
4190	CD15	1	0.95970696	0.6197433394	0.3188465511
4302	CD15	1	0.978021978	0.5115749659	0.2411377469
4314	CD15	1	0.945054945	0.6423138245	0.3150246295
4380	CD15	0	0.538461538	0.4476347469	0.0309823592
4419	CD15	0	0.087912088	0.3523738854	-0.1555874801
4457	CD15	1	0.952380952	0.506525156	0.2910975999
4482	CD15	0	0.058608059	0.3520986062	0.0254784567
4505	CD15	1	0.846153846	0.4730586042	-0.1145910739
4506	CD15	0	0.018315018	0.222006667	0.0757073313
4508	CD15	0	0.47985348	0.402385261	-0.1079430714
4510	CD15	0	0.234432234	0.2606396306	0.2533168098
4520	CD15	0	0.26007326	0.415188159	0.2739911139
4537	CD15	0	0.626373626	0.4794850292	-0.1021061424
4558	CD15	0	0.355311355	0.6682417241	0.2247761737
4620	CD15	0	0.600732601	0.5090516215	-0.0084244095
4637	CD15	0	0.523809524	0.4062551796	-0.0794854636
4678	CD15	0	0.714285714	0.6629418277	0.4153917864
4691	CD15	1	0.915750916	0.4891400602	0.2134686238
4728	CD15	0	0.446886447	0.2842169858	0.1510837313
4732	CD15	1	0.926739927	0.6985503516	0.683907524
4761	CD15	0	0.216117216	0.5941569834	0.2562069297
4803	CD15	0	0.172161172	0.1751417143	-0.0078247504
4827	CD15	0	0.212454212	0.3331661718	0.0713060838
4847	CD15	0	0.494505495	0.508282005	0.0926400985
4861	CD15	0	0.271062271	0.3359278048	0.2618148843
4877	CD15	0	0.095238095	0.2837061219	-0.0811806004
4915	CD15	0	0.245421245	0.2002355635	0.2818201974
4962	CD15	1	0.805860806	0.5151826568	0.2397502413
4971	CD15	0	0.798534799	0.3629834291	0.1343899336
5006	CD15	0	0.637362637	0.6295578767	-0.1093849811
5013	CD15	0	0.208791209	0.3310003568	0.2009113482
5029	CD15	0	0.142857143	0.2637774991	-0.1189663143
5141	CD15	0	0.644688645	0.567253757	0.0872751416
5190	CD15	0	0.41025641	0.3722976907	-0.1058026771
5207	CD15	0	0.765567766	0.4812799831	-0.1003876066
5246	CD15	0	0.648351648	0.5923923375	0.5487037023
5287	CD15	0	0.567765568	0.5746134938	0.3576233882
5288	CD15	0	0.175824176	0.4031559456	-0.1698200593
24	CD28	0	0.013513514	0.443900453	-0.142617412
44	CD28	0	0.405405405	0.5893242228	-0.0622293248
63	CD28	0	0.5	0.3304016684	0.110982087
100	CD28	0	0.054054054	0.2430828261	0.1120476254
194	CD28	0	0.635135135	0.4704458166	0.4476366998
240	CD28	0	0.581081081	0.5566997886	0.2838539002
345	CD28	1	0.824324324	0.6465818079	0.5099783176
346	CD28	0	0.108108108	0.3492774112	0.2499315191
392	CD28	1	0.837837838	0.534983483	0.135950565
442	CD28	0	0.175675676	0.31351084	-0.0449009825
449	CD28	0	0.567567568	0.5627434065	0.2337140657
458	CD28	0	0.621621622	0.4986931769	0.1642343257
480	CD28	0	0.702702703	0.5737588942	0.3873962797
509	CD28	0	0.135135135	0.2750977701	0.2619761713
726	CD28	0	0.540540541	0.5821685212	0.1633321116
880	CD28	0	0.121621622	0.1926616647	-0.0172749921
914	CD28	0	0.324324324	0.451989501	-0.0215124188
964	CD28	0	0.72972973	0.4681628683	0.5803588534
998	CD28	0	0.378378378	0.5631504595	0.2061861521
1057	CD28	0	0.067567568	0.5010035278	-0.0720239364
1114	CD28	0	0.662162162	0.5522416129	0.3451117613
1206	CD28	0	0.716216216	0.7253199144	0.5193989151
1480	CD28	0	0.040540541	0.1640325769	-0.0536541768
1581	CD28	0	0.527027027	0.4636381893	-0.0264578796
1791	CD28	0	0.243243243	0.3865649602	-0.0564201185
1822	CD28	0	0.189189189	0.5517908171	0.0937562669
1848	CD28	0	0.648648649	0.2954174226	0.0331852447
2004	CD28	0	0.22972973	0.3675020001	0.0306572806
2050	CD28	0	0.351351351	0.4230539264	0.1335590332
2063	CD28	0	0.689189189	0.5044126639	0.371114955
2088	CD28	0	0.094594595	0.4740384498	0.1168455066
2099	CD28	0	0.77027027	0.6567265405	0.4366390185
2123	CD28	0	0.391891892	0.3667954671	-0.0326959119
2128	CD28	0	0.162162162	0.4030183164	-0.0401301804
2223	CD28	0	0.364864865	0.5664088413	0.2173388595
2224	CD28	1	0.959459459	0.685649974	0.1881879671
2247	CD28	1	0.972972973	0.6064793131	0.4799190491
2248	CD28	0	0.486486486	0.4164357968	0.1328820042
2330	CD28	0	0.783783784	0.4929081796	0.2034372849
2349	CD28	0	0.027027027	0.4311711494	0.1922819561
2362	CD28	1	0.891891892	0.6389137127	0.536747967
2371	CD28	0	0.554054054	0.3305701924	0.2818079437
2726	CD28	1	0.810810811	0.306601208	0.4148172164
3040	CD28	0	0.513513514	0.3853596394	0.4262561557
3057	CD28	0	0.418918919	0.3906541965	-0.1074173686
3180	CD28	0	0.445945946	0.5561878728	0.1248149237
3215	CD28	0	0.256756757	0.37820332	0.1978869284
3322	CD28	0	0.797297297	0.6041315267	0.3574310887
3339	CD28	1	0.918918919	0.8503143739	0.4285214266
3357	CD28	0	0.310810811	0.2930494368	0.2661879703
3987	CD28	0	0.081081081	0.4683369754	-0.0260027749
4061	CD28	0	0.432432432	0.3308168091	0.3688954582
4080	CD28	1	1	0.6568762554	0.3573071458
4151	CD28	0	0.459459459	0.4707809166	0.0592879264
4192	CD28	0	0.216216216	0.3241326118	0.2377699284
4367	CD28	1	0.986486486	0.6475927835	0.0711373603
4504	CD28	0	0.594594595	0.3165673924	0.2183162973
4512	CD28	1	0.851351351	0.6355049014	0.4789774984
4525	CD28	0	0.756756757	0.6168221541	0.3983376718
4640	CD28	1	0.905405405	0.6399623144	0.4994654031
4715	CD28	0	0.337837838	0.2765986136	0.2215304162
4742	CD28	0	0.608108108	0.6926719042	0.257350926
4816	CD28	0	0.148648649	0.4322615019	-0.2696292883
4840	CD28	0	0.283783784	0.3732730783	0.0219970116
4901	CD28	0	0.472972973	0.2735610375	0.0114173059
4963	CD28	1	0.945945946	0.6292256561	0.147387133
5025	CD28	0	0.202702703	0.4654779639	0.2278439917
5088	CD28	0	0.743243243	0.5664610022	0.2195874235
5130	CD28	1	0.864864865	0.676961112	0.4273428641
5132	CD28	0	0.27027027	0.6107421145	-0.0178521555
5138	CD28	0	0.675675676	0.4859721333	0.196547742
5139	CD28	0	0.297297297	0.322022404	-0.1238298673
5181	CD28	1	0.878378378	0.4361733356	0.1588078886
5220	CD28	1	0.932432432	0.7019663455	0.3540626088
43	CD33	0	0.264069264	0.540375454	0.0851255482
80	CD33	0	0.201298701	0.5120353802	0.2117273409
232	CD33	0	0.235930736	0.5400431623	0.2418788015
262	CD33	0	0.251082251	0.530826198	-0.1271363664
314	CD33	0	0.484848485	0.5940261973	0.1646700095
326	CD33	0	0.751082251	0.5828453036	0.4180519471
379	CD33	0	0.463203463	0.4237995914	-0.257027478
402	CD33	0	0.517316017	0.5665236981	0.3021384652
414	CD33	0	0.614718615	0.5454269939	0.2897287861
430	CD33	0	0.454545455	0.4333728904	0.0779916376
436	CD33	0	0.346320346	0.4342608343	-0.1864091815
503	CD33	0	0.603896104	0.3222077334	0.0774346656
539	CD33	0	0.543290043	0.542816464	0.0863864524
565	CD33	0	0.015151515	0.3997502561	-0.1219225499
581	CD33	0	0.612554113	0.5075116463	-0.1316710521
809	CD33	0	0.696969697	0.6085752522	0.2676407617
821	CD33	0	0.064935065	0.3580407678	0.1497468324
831	CD33	0	0.329004329	0.5374603705	0.2464230827
832	CD33	0	0.33982684	0.361211258	-0.0222648678
838	CD33	0	0.322510823	0.6141230233	0.3231852764
860	CD33	0	0.69047619	0.5837156815	0.2374323316
872	CD33	0	0.45021645	0.6306266223	0.0425534583
887	CD33	0	0.03030303	0.2368818315	-0.127522916
901	CD33	0	0.216450216	0.4604504909	0.0585340263
906	CD33	0	0.028138528	0.1692940542	0.1080633741
930	CD33	0	0.374458874	0.4289056034	0.1031116429
954	CD33	0	0.329004329	0.3265631151	0.3192211161
999	CD33	1	0.948051948	0.6407031534	0.5899737797
1032	CD33	0	0.255411255	0.6600367462	0.451693979
1058	CD33	0	0.359307359	0.5894505661	-0.0424772986
1079	CD33	1	0.913419913	0.7230442177	0.0880881878
1117	CD33	0	0.11038961	0.3301134972	-0.0830611252
1200	CD33	0	0.705627706	0.5468596964	0.0910433717
1286	CD33	0	0.582251082	0.4704699135	-0.1217998685
1287	CD33	0	0.134199134	0.5610578503	0.3293368882
1313	CD33	0	0.571428571	0.6347711073	0.2524262922
1347	CD33	0	0.751082251	0.6267679725	-0.0534947698
1385	CD33	0	0.25974026	0.4683114673	-0.0017007904
1408	CD33	0	0.383116883	0.4565212821	0.1296929116
1443	CD33	0	0.279220779	0.3868611804	0.0574793952
1444	CD33	0	0.119047619	0.4144011074	0.0809393975
1461	CD33	0	0.149350649	0.4457069016	0.0253718369
1462	CD33	0	0.37012987	0.3312706976	0.0787653025
1487	CD33	0	0.082251082	0.2969097814	0.0861451358
1497	CD33	0	0.582251082	0.5768424626	-0.0884225977
1532	CD33	0	0.772727273	0.6158654883	0.0394964836
1564	CD33	0	0.413419913	0.3603503296	0.0414802724
1565	CD33	0	0.67965368	0.6412534257	0.3103975706
1642	CD33	1	0.813852814	0.6388233427	0.1729503673
1658	CD33	0	0.192640693	0.4572714052	0.1584312215
1716	CD33	0	0.636363636	0.5768649635	0.0767828369
1731	CD33	0	0.11038961	0.5213420088	0.0842912353
1745	CD33	0	0.454545455	0.4266834921	0.079883099
1769	CD33	0	0.305194805	0.3886814142	-0.1462044319
1773	CD33	0	0.792207792	0.5560495281	-0.0860017018
1785	CD33	0	0.199134199	0.4217538078	-0.0152958512
1839	CD33	0	0.359307359	0.5207794692	0.1849093182
1854	CD33	0	0.781385281	0.7121486128	0.0397974783
1903	CD33	0	0.742424242	0.6232040839	0.6805964036
1932	CD33	0	0.248917749	0.4810144573	0.2813545601
1963	CD33	1	0.893939394	0.6356165818	0.3209728629
1964	CD33	0	0.393939394	0.4395273023	0.1054780587
1973	CD33	0	0.25974026	0.3875767561	0.056035577
2023	CD33	0	0.761904762	0.5667216887	0.0496703435
2125	CD33	0	0.054112554	0.4898233911	0.301029945
2135	CD33	0	0.53030303	0.4170115406	0.0827271413
2136	CD33	0	0.454545455	0.5179213801	-0.0588812855
2169	CD33	0	0.021645022	0.5333631138	0.0965010276
2184	CD33	1	0.837662338	0.6727669806	0.2186385536
2386	CD33	0	0.567099567	0.4629850819	0.0699429423
2425	CD33	0	0.435064935	0.4975004427	0.0361088299
2487	CD33	0	0.422077922	0.459814799	-0.0711933155
2537	CD33	0	0.554112554	0.6267121924	0.0944130115
2631	CD33	0	0.186147186	0.4923196861	0.1182757877
2637	CD33	0	0.201298701	0.637767781	0.0611074108
2640	CD33	0	0.456709957	0.5159883348	0.1176396433
2642	CD33	1	0.891774892	0.7831546528	0.3103958219
2693	CD33	0	0.545454545	0.6690179547	0.1611916162
2716	CD33	1	0.844155844	0.6935521358	0.1597412849
2718	CD33	0	0.640692641	0.4158761715	0.0533420588
2733	CD33	0	0.612554113	0.5531738081	0.1630553323
2766	CD33	0	0.428571429	0.402637566	-0.0450192981
2867	CD33	1	0.935064935	0.7326279155	0.3014523889
2971	CD33	1	0.898268398	0.7277121216	0.3394123422
3008	CD33	0	0.573593074	0.5152099912	0.1688122546
3050	CD33	1	0.863636364	0.5751260283	0.1478799522
3077	CD33	1	0.887445887	0.5390891936	0.3672935972
3091	CD33	0	0.597402597	0.4640532452	0.3077952641
3153	CD33	1	0.939393939	0.6299782365	0.5844913653
3164	CD33	0	0.41991342	0.6264285111	0.2836373348
3231	CD33	0	0.586580087	0.5702329033	0.3384405037
3232	CD33	0	0.720779221	0.7011782163	0.0122326157
3262	CD33	0	0.422077922	0.5418514651	-0.1004137005
3354	CD33	1	0.922077922	0.6141914435	0.4185845147
3358	CD33	1	0.91991342	0.615793567	0.3171039512
3366	CD33	0	0.337662338	0.6038183143	0.1478734143
3441	CD33	1	0.904761905	0.6446760952	0.2933219041
3447	CD33	0	0.5995671	0.4798427402	0.0687356666
3490	CD33	0	0.519480519	0.4740941443	0.2820615876
3540	CD33	1	0.896103896	0.6577242111	0.3127626333
3589	CD33	0	0.170995671	0.4404544259	0.0336751317
3617	CD33	0	0.584415584	0.5358557325	0.0090955416
3620	CD33	0	0.229437229	0.450495247	0.3668799908
3624	CD33	0	0.036796537	0.1811163179	0.0459754977
3635	CD33	0	0.103896104	0.4680472813	-0.0399027723
3641	CD33	0	0.686147186	0.6109221441	-0.0850446564
3678	CD33	0	0.121212121	0.4284401344	0.3745444077
3679	CD33	0	0.67965368	0.6055748532	0.006557023
3785	CD33	0	0.696969697	0.544455298	0.0559894122
3872	CD33	1	0.915584416	0.6743291035	0.2294069904
3880	CD33	0	0.186147186	0.3167937766	-0.0819802472
3921	CD33	0	0.244588745	0.3864467425	0.1290076055
3956	CD33	0	0.766233766	0.5653237101	-0.0471808549
3974	CD33	0	0.090909091	0.3582077734	0.025452367
4022	CD33	0	0.662337662	0.5339872127	-0.1282210325
4030	CD33	0	0.597402597	0.5720945613	0.1558800236
4064	CD33	0	0.5	0.5565860717	-0.2382258681
4070	CD33	1	0.885281385	0.4822446364	0.4317461073
4170	CD33	0	0.138528139	0.4411044131	-0.016993842
4210	CD33	0	0.463203463	0.5687976549	0.1466568212
4213	CD33	0	0.612554113	0.5729213785	0.303889715
4261	CD33	1	0.902597403	0.6975881265	0.3375173648
4276	CD33	1	0.831168831	0.6105454084	0.4168730542
4345	CD33	0	0.341991342	0.4299906801	0.2864430345
4355	CD33	0	0.495670996	0.2765948353	0.0484527631
4404	CD33	0	0.586580087	0.5705093723	0.107767677
4461	CD33	0	0.681818182	0.7121588262	0.168134853
4485	CD33	1	0.846320346	0.4597084612	0.6643767458
4487	CD33	0	0.296536797	0.3164961507	0.0007780215
4489	CD33	0	0.238095238	0.3526674673	-0.1327766059
4534	CD33	0	0.554112554	0.4772156821	0.0109058541
4611	CD33	0	0.792207792	0.5954710415	0.2986299125
4632	CD33	1	0.818181818	0.6912171347	0.3350938083
4657	CD33	1	0.971861472	0.7088992348	0.5491127596
4708	CD33	0	0.04978355	0.2241108882	-0.0993458811
4735	CD33	0	0.385281385	0.6134345487	0.2743468463
4749	CD33	0	0.545454545	0.4207708392	0.2742812355
4770	CD33	0	0.406926407	0.4654113965	-0.1301269766
4832	CD33	0	0.192640693	0.3894892903	-0.0785315164
4841	CD33	0	0.712121212	0.4647171588	-0.140496958
4869	CD33	0	0.103896104	0.4608906731	0.0844035344
4879	CD33	0	0.095238095	0.2155189311	0.0724446658
4910	CD33	0	0.435064935	0.4437709545	0.0255176112
4919	CD33	1	0.974025974	0.8164068312	0.4281587537
4945	CD33	0	0.445887446	0.502573274	0.2477371681
4948	CD33	0	0.748917749	0.6040894962	0.155514107
4966	CD33	1	0.928571429	0.5035651987	0.2681823757
4978	CD33	1	0.917748918	0.682119163	0.4181703198
4997	CD33	1	0.800865801	0.5215263889	0.2908666206
5010	CD33	0	0.383116883	0.3790848083	0.1000746162
5026	CD33	0	0.718614719	0.4747083919	-0.0813145549
5028	CD33	1	0.848484848	0.6585131227	0.1681582439
5182	CD33	0	0.058441558	0.3869095074	0.068007998
5186	CD33	0	0.792207792	0.5663692255	-0.0795459243
34	CD43	0	0.007246377	0.1918936941	0.0437726816
39	CD43	0	0.644927536	0.5940822656	-0.2301751251
130	CD43	0	0.065217391	0.2432617326	-0.1384489742
133	CD43	0	0.057971014	0.3217474861	0.0703450911
136	CD43	1	0.862318841	0.5929168435	0.2012590977
159	CD43	0	0.384057971	0.4585157291	-0.1004964702
175	CD43	0	0.557971014	0.6331357199	0.2812559841
256	CD43	1	0.963768116	0.7111980945	0.5788180403
265	CD43	0	0.717391304	0.739006944	0.1805756976
269	CD43	1	0.949275362	0.7210738525	0.647643683
313	CD43	0	0.355072464	0.4930750535	-0.0343871638
327	CD43	0	0.615942029	0.7414279087	0.2411339435
371	CD43	0	0.492753623	0.4671215728	-0.1045325548
374	CD43	0	0.710144928	0.6448940508	0.1284357465
400	CD43	0	0.608695652	0.5535652872	0.0259949333
431	CD43	0	0.579710145	0.496682021	0.0362865609
435	CD43	0	0.188405797	0.2855362323	-0.1012481138
525	CD43	0	0.442028986	0.5037433107	0.2600670282
550	CD43	0	0.782608696	0.7600831416	0.4530281335
583	CD43	0	0.268115942	0.4190840325	0.1095367101
587	CD43	1	0.826086957	0.6079657355	0.3709087575
619	CD43	0	0.347826087	0.5861035518	0.5674242005
622	CD43	0	0.746376812	0.4525486218	0.2071782653
759	CD43	0	0.289855072	0.4885702054	0.1447854176
775	CD43	0	0.666666667	0.7108760306	-0.0893454187
804	CD43	0	0.369565217	0.5603146291	0.2760888797
846	CD43	0	0.413043478	0.5547144629	0.0167557367
852	CD43	0	0.789855072	0.5271289899	0.2714875294
883	CD43	0	0.5	0.6564518595	0.1656990707
932	CD43	1	0.905797101	0.5541999362	0.2213560639
1055	CD43	0	0.231884058	0.5420307685	0.0573065325
1056	CD43	0	0.630434783	0.599669156	-0.1652441134
1175	CD43	0	0.601449275	0.6810923025	0.2973557979
1223	CD43	1	0.804347826	0.7659031173	0.2615088841
1245	CD43	0	0.195652174	0.339284494	0.1333696908
1259	CD43	0	0.166666667	0.2584774463	-0.1005113933
1260	CD43	0	0.768115942	0.5908237142	0.1280469008
1350	CD43	0	0.224637681	0.3523334603	0.1591170205
1511	CD43	0	0.239130435	0.5479494439	0.036358318
1555	CD43	0	0.47826087	0.4839071019	-0.0752382763
1610	CD43	0	0.260869565	0.5649061279	0.1719770559
1619	CD43	1	0.81884058	0.6273544071	0.1835517237
1674	CD43	1	0.811594203	0.7261998932	0.6032430451
1703	CD43	0	0.565217391	0.6859550413	0.2803477813
1717	CD43	0	0.144927536	0.3412768588	0.2507692733
1727	CD43	1	0.876811594	0.6375094499	0.467914308
1742	CD43	1	0.855072464	0.5857380275	0.1206535879
1749	CD43	0	0.775362319	0.6293812933	0.1765574256
1752	CD43	0	0.152173913	0.4284024039	0.0725340537
1768	CD43	0	0.101449275	0.4866736873	0.1290438725
1770	CD43	0	0.586956522	0.6395578661	-0.1541599368
1792	CD43	0	0.202898551	0.2825554764	-0.1884518449
1807	CD43	0	0.246376812	0.4901461059	-0.0263680043
1910	CD43	0	0.043478261	0.3876902362	0.2469907301
1930	CD43	0	0.543478261	0.5869296444	0.2103336486
1978	CD43	0	0.391304348	0.4692155464	0.1014041055
2028	CD43	0	0.333333333	0.5245427519	-0.1292604931
2039	CD43	0	0.652173913	0.7026411826	0.2760713871
2048	CD43	0	0.702898551	0.6798192866	0.2421103136
2308	CD43	0	0.514492754	0.6333775622	0.0002012965
2387	CD43	1	0.869565217	0.630593373	0.3531454338
2450	CD43	0	0.275362319	0.2670087701	0.1948092597
2525	CD43	1	0.898550725	0.7043792099	0.2124550128
2582	CD43	1	0.971014493	0.6989622746	0.3552857729
2592	CD43	0	0.108695652	0.2731363654	-0.0396331744
2598	CD43	0	0.463768116	0.6204479925	-0.0649759403
2610	CD43	0	0.15942029	0.3821793659	0.1460208604
2629	CD43	1	0.884057971	0.6559464718	0.3238496126
2653	CD43	0	0.028985507	0.4852299263	0.0058519932
2685	CD43	0	0.427536232	0.5450559629	0.1420064895
2722	CD43	1	0.920289855	0.5588738528	0.6048121774
2732	CD43	0	0.014492754	0.4060081295	0.1122430519
2752	CD43	0	0.31884058	0.4500753147	0.2245334887
2783	CD43	0	0.434782609	0.4360331829	0.0926912616
2804	CD43	0	0.65942029	0.6497357802	0.2206981554
2833	CD43	0	0.072463768	0.4863627957	0.3227768867
2849	CD43	0	0.18115942	0.4770426769	0.4776460454
2853	CD43	0	0.507246377	0.6912785485	0.2400456706
2870	CD43	0	0.471014493	0.603560185	0.3022293535
2947	CD43	1	0.927536232	0.6354046348	0.3804476174
2991	CD43	1	0.833333333	0.5245723102	0.16815141
3026	CD43	1	1	0.6295437336	0.5899955746
3027	CD43	1	1	0.6295437336	0.5898912685
3028	CD43	1	1	0.6295437336	0.5899957545
3029	CD43	1	1	0.6295437336	0.5898914489
3030	CD43	1	1	0.6295437336	0.5899959352
3031	CD43	1	1	0.6295437336	0.58989163
3032	CD43	1	1	0.6295437336	0.5899961166
3033	CD43	1	1	0.6295437336	0.5898918119
3078	CD43	0	0.637681159	0.5204973269	0.2137187314
3098	CD43	0	0.036231884	0.4681461488	0.1142650201
3111	CD43	0	0.210144928	0.4377520609	0.2274790837
3268	CD43	1	0.942028986	0.5449991445	0.542682497
3269	CD43	1	0.913043478	0.5702468474	0.6226468383
3285	CD43	0	0.405797101	0.5689045775	0.4228939049
3292	CD43	1	0.847826087	0.641993475	0.1713463988
3318	CD43	1	0.84057971	0.6034747672	0.2454379872
3323	CD43	0	0.695652174	0.6773325479	0.2651205624
3338	CD43	0	0.086956522	0.2403067809	0.0480310065
3340	CD43	0	0.282608696	0.4880576635	0.1575346725
3392	CD43	1	0.891304348	0.7081216409	0.1023232688
3472	CD43	0	0.572463768	0.5730552487	0.2837993987
3475	CD43	0	0.376811594	0.6648376956	0.0060606071
3507	CD43	0	0.550724638	0.6489169519	0.2968387994
3556	CD43	0	0.362318841	0.6080522268	0.1116885851
3636	CD43	0	0.485507246	0.6263841356	0.3174142486
3638	CD43	0	0.130434783	0.4642613239	-0.1629714549
3653	CD43	1	0.956521739	0.637241418	0.2945229698
3709	CD43	0	0.724637681	0.3993125076	0.0218549459
3736	CD43	0	0.731884058	0.6530863353	0.0697682431
3754	CD43	1	0.985507246	0.5601487642	0.1344991957
3763	CD43	0	0.304347826	0.4753428495	-0.2479750938
3817	CD43	0	0.123188406	0.3367031545	0.2771203812
3843	CD43	1	0.97826087	0.6430328267	0.3979622348
3881	CD43	0	0.688405797	0.5879471525	0.022005965
3932	CD43	0	0.079710145	0.2860484063	0.0453591261
4049	CD43	0	0.623188406	0.6841424245	0.3484687015
4168	CD43	0	0.536231884	0.6715472344	0.1693358304
4206	CD43	0	0.398550725	0.538848214	0.2226676994
4214	CD43	0	0.673913043	0.5569153735	0.1928346458
4291	CD43	0	0.050724638	0.2845643122	0.0544918266
4315	CD43	0	0.797101449	0.7357824287	0.292014839
4391	CD43	0	0.02173913	0.3116099748	-0.002597041
4465	CD43	0	0.420289855	0.3041897787	-0.0416294045
4473	CD43	0	0.217391304	0.5021686083	0.1524998027
4516	CD43	0	0.594202899	0.5297375358	-0.0369380115
4521	CD43	0	0.528985507	0.569270193	-0.1123140303
4575	CD43	0	0.297101449	0.4802767343	0.0373365041
4591	CD43	0	0.760869565	0.4593662976	-0.0335779017
4675	CD43	0	0.34057971	0.5560136696	0.1803283515
4692	CD43	0	0.326086957	0.4332560632	0.2262585095
4707	CD43	0	0.115942029	0.1312188609	0.0249540985
4722	CD43	0	0.311594203	0.5029738164	0.0448631549
4730	CD43	0	0.449275362	0.5246755856	0.2157412951
4792	CD43	0	0.094202899	0.4976238105	0.0848815774
4898	CD43	0	0.753623188	0.4735695875	0.0774980313
4913	CD43	1	0.992753623	0.6130203351	0.3940992227
4960	CD43	0	0.456521739	0.5557230546	0.19658517
4998	CD43	0	0.68115942	0.6676577778	0.2616932573
5004	CD43	0	0.253623188	0.5237479374	-0.192732171
5171	CD43	0	0.52173913	0.4756826538	0.3554062196
5176	CD43	0	0.739130435	0.6544414761	0.3283570627
5177	CD43	0	0.173913043	0.5248448494	0.2108923326
5185	CD43	1	0.934782609	0.6221448937	0.3597345258
5201	CD43	0	0.137681159	0.1432633121	-0.0695734007
14	CD45	0	0.581227437	0.6174712871	0.192233914
33	CD45	0	0.657039711	0.5713270027	0.4055189908
38	CD45	1	0.996389892	0.6728217154	0.5310935095
42	CD45	0	0.725631769	0.5854654185	0.1122476403
54	CD45	0	0.653429603	0.674194574	0.1351638325
74	CD45	1	0.931407942	0.629647012	0.1425239912
77	CD45	0	0.386281588	0.5747327853	0.0197639171
82	CD45	0	0.288808664	0.4860502206	0.0905401203
83	CD45	0	0.458483755	0.4816440129	0.1926129667
109	CD45	0	0.108303249	0.4593547437	0.0317887381
121	CD45	1	0.83032491	0.7086022491	0.1802685596
142	CD45	0	0.259927798	0.3913974233	-0.028106392
143	CD45	0	0.306859206	0.3196097605	0.1689977583
160	CD45	0	0.566787004	0.6248557973	0.2124954539
181	CD45	1	0.895306859	0.6464816008	0.4498362575
195	CD45	0	0.750902527	0.5495129605	0.2799706381
199	CD45	1	0.841155235	0.6837122273	0.3999670535
207	CD45	1	0.819494585	0.7471209869	0.2165635446
218	CD45	0	0.115523466	0.2792008946	-0.1102593463
239	CD45	1	0.823104693	0.5470504323	0.2394166196
242	CD45	0	0.223826715	0.4251787447	0.1905510171
243	CD45	1	0.938628159	0.5928112453	0.2279383379
244	CD45	1	0.927797834	0.5565319565	0.5264937837
257	CD45	0	0.25631769	0.5175943196	0.3471332496
293	CD45	0	0.559566787	0.5148935777	-0.037180064
328	CD45	0	0.23465704	0.5076730395	0.0665672057
336	CD45	1	0.870036101	0.547008283	0.2250671494
357	CD45	1	0.971119134	0.6341377211	0.2634631984
366	CD45	0	0.231046931	0.7171882258	0.4160182007
373	CD45	0	0.209386282	0.5754600376	0.1445567939
388	CD45	0	0.436823105	0.4151702972	-0.0142775607
389	CD45	0	0.620938628	0.6280335573	0.4838708322
393	CD45	0	0.584837545	0.4523672927	0.2596690379
401	CD45	0	0.483754513	0.4406618778	0.1439609138
432	CD45	0	0.16967509	0.5932952017	0.0576917969
433	CD45	0	0.779783394	0.5689173247	0.2009251446
450	CD45	1	0.884476534	0.7177750723	0.3368484735
451	CD45	0	0.545126354	0.5056658268	-0.087106413
489	CD45	0	0.548736462	0.6310308114	0.343870923
534	CD45	0	0.180505415	0.1971841599	0.0101459881
553	CD45	1	0.924187726	0.5598786855	0.4338577393
562	CD45	0	0.314079422	0.3805168695	0.0866156332
564	CD45	0	0.592057762	0.7084276289	0.1756432272
566	CD45	0	0.422382671	0.4759713468	-0.0115314551
582	CD45	1	0.906137184	0.721639926	0.4684908284
589	CD45	1	0.989169675	0.7242266382	0.3323145385
595	CD45	0	0.19133574	0.3177153612	0.1595845708
609	CD45	0	0.736462094	0.5121376028	0.3700145322
620	CD45	0	0.707581227	0.4563142107	0.123621736
627	CD45	0	0.296028881	0.494312395	0.0368604424
632	CD45	0	0.689530686	0.5826642481	0.5824245196
643	CD45	0	0.42599278	0.601790246	0.3780482197
757	CD45	0	0.238267148	0.4293447452	0.4579354577
761	CD45	0	0.59566787	0.625429	0.021568665
765	CD45	0	0.465703971	0.348559385	-0.0975570419
781	CD45	0	0.028880866	0.3181331511	0.2894512429
828	CD45	0	0.40433213	0.6088850104	-0.0264369878
879	CD45	0	0.501805054	0.5778178244	0.3543848305
893	CD45	0	0.332129964	0.4536999524	0.3596930834
905	CD45	0	0.418772563	0.4274102216	-0.1978346601
911	CD45	1	0.888086643	0.5258813804	0.2802788928
934	CD45	0	0.606498195	0.5537392284	0.0620870759
937	CD45	0	0.631768953	0.6336778137	-0.0117201578
947	CD45	0	0.205776173	0.318413432	0.2648867985
960	CD45	0	0.454873646	0.5583043903	0.4019863128
961	CD45	1	0.960288809	0.6785906688	0.4869289254
962	CD45	1	0.981949458	0.5933200617	0.4940972736
966	CD45	1	0.942238267	0.5383865672	0.5704298722
983	CD45	1	0.898916968	0.6817481611	0.8768697833
985	CD45	0	0.462093863	0.5742792982	0.1794703225
986	CD45	1	0.859205776	0.5996319239	0.3976221201
987	CD45	0	0.133574007	0.3103733416	-0.0938474702
1002	CD45	0	0.010830325	0.2714240422	0.1176650994
1019	CD45	0	0.487364621	0.4700505783	-0.0352211443
1023	CD45	0	0.74368231	0.5998088605	0.1018309781
1043	CD45	0	0.57400722	0.3983660158	0.1635980741
1044	CD45	0	0.270758123	0.3179074724	0.1228813325
1076	CD45	0	0.38267148	0.503445165	-0.0078778854
1083	CD45	0	0.407942238	0.5619996169	-0.0153921183
1085	CD45	0	0.505415162	0.5922612023	0.2004803906
1097	CD45	0	0.018050542	0.5539688938	0.1795195531
1098	CD45	0	0.772563177	0.5503531856	0.2562387046
1104	CD45	0	0.184115523	0.5598012417	0.1954129103
1110	CD45	0	0.335740072	0.5484591554	0.2087944027
1121	CD45	0	0.046931408	0.2174537904	-0.1619073692
1154	CD45	0	0.530685921	0.5333360228	0.1208388927
1162	CD45	0	0.519855596	0.5515987863	0.2307785772
1176	CD45	0	0.78700361	0.6923905086	0.2250242134
1184	CD45	0	0.119133574	0.097734108	-0.21322507
1188	CD45	0	0.061371841	0.4906009496	-0.1863063781
1197	CD45	0	0.61732852	0.5170881596	0.372133918
1202	CD45	0	0.472924188	0.3354871801	0.2046115284
1233	CD45	0	0.375451264	0.4318270207	0.0512307992
1243	CD45	0	0.292418773	0.4989792358	0.3663887275
1269	CD45	0	0.790613718	0.6226808363	0.2133341566
1300	CD45	0	0.303249097	0.3874087393	0.1892178203
1354	CD45	0	0.671480144	0.4205489128	-0.0657505539
1367	CD45	0	0.227436823	0.3881370911	0.0065476798
1409	CD45	1	0.902527076	0.5530703296	0.5897360147
1471	CD45	0	0.498194946	0.5657282271	0.2217725065
1499	CD45	0	0.703971119	0.6608403553	0.146269679
1516	CD45	0	0.599277978	0.5003640139	0.3557401799
1520	CD45	0	0.003610108	0.3243561266	0.0730738674
1557	CD45	1	0.801444043	0.598582784	0.5559039521
1575	CD45	1	0.949458484	0.5366453257	0.4992405952
1583	CD45	0	0.602888087	0.5054031557	0.0850740308
1585	CD45	0	0.039711191	0.1238948858	0.1679880825
1641	CD45	0	0.173285199	0.4414386959	0.0838035408
1647	CD45	0	0.032490975	0.2797043077	-0.0951098048
1708	CD45	1	0.837545126	0.6255342511	0.5624739398
1757	CD45	0	0.613718412	0.5374325167	-0.1522749473
1809	CD45	0	0.342960289	0.4431867196	0.1215488863
1827	CD45	0	0.400722022	0.4971286552	0.0927196006
1834	CD45	0	0.328519856	0.4091444585	-0.0913810454
1898	CD45	0	0.628158845	0.5821978419	-0.0859641101
1940	CD45	0	0.064981949	0.3251433409	0.0023409925
1957	CD45	1	0.80866426	0.6923045134	0.235542926
1975	CD45	1	0.909747292	0.5609910914	0.0933142741
2012	CD45	0	0.144404332	0.2713142442	0.3174804184
2029	CD45	0	0.415162455	0.5415131828	-0.0024364414
2064	CD45	0	0.494584838	0.5134217329	0.3106525944
2071	CD45	0	0.527075812	0.424531888	0.0005085785
2079	CD45	0	0.166064982	0.5588176122	0.2784455605
2228	CD45	0	0.198555957	0.3792247215	0.4688199802
2264	CD45	0	0.711191336	0.60008549	0.3096584296
2298	CD45	0	0.516245487	0.5864454741	0.0913604595
2310	CD45	0	0.104693141	0.2479185674	0.0346052628
2356	CD45	0	0.097472924	0.3809939315	0.0106100625
2363	CD45	0	0.649819495	0.5429219378	0.1767490627
2383	CD45	1	0.891696751	0.6265891223	0.4793473627
2438	CD45	0	0.512635379	0.6056455944	0.2502427298
2470	CD45	0	0.21299639	0.2751279313	-0.0732032238
2472	CD45	0	0.642599278	0.703669219	0.2859061025
2494	CD45	0	0.353790614	0.4572533511	0.2975406965
2503	CD45	0	0.079422383	0.2037591614	0.1231421912
2526	CD45	0	0.324909747	0.4153986899	-0.1249143667
2550	CD45	0	0.476534296	0.5093047905	0.0849288609
2564	CD45	0	0.429602888	0.5909905685	-0.0924981438
2624	CD45	0	0.740072202	0.5852431856	0.4119657554
2636	CD45	0	0.321299639	0.4828336055	0.1219891527
2699	CD45	0	0.761732852	0.6367117985	0.4491660907
2701	CD45	0	0.646209386	0.607931828	0.1697915403
2723	CD45	0	0.411552347	0.5991257757	0.1478123698
2727	CD45	0	0.158844765	0.2867119681	0.088727383
2784	CD45	0	0.664259928	0.5521391812	0.151247152
2785	CD45	0	0.570397112	0.4951753139	0.0704649396
2810	CD45	1	0.974729242	0.6100853214	0.1565859379
2829	CD45	0	0.635379061	0.5399102808	0.4002353391
2841	CD45	0	0.776173285	0.4656015675	-0.0006302947
2852	CD45	0	0.480144404	0.4728353978	0.0632911878
2855	CD45	1	0.855595668	0.6618631701	0.4269601631
2863	CD45	1	0.815884477	0.6641219227	0.2155897961
2873	CD45	1	0.963898917	0.6814814437	0.4847011738
2937	CD45	0	0.368231047	0.6845473293	0.1262777991
3006	CD45	0	0.393501805	0.4969975496	0.2689513981
3042	CD45	1	0.945848375	0.5762197507	0.4772490848
3076	CD45	1	0.833935018	0.7660055449	0.240015546
3168	CD45	0	0.768953069	0.5616395904	0.112049907
3286	CD45	0	0.732851986	0.5305546229	-0.1569383656
3350	CD45	1	0.920577617	0.7062456483	0.2824330387
3370	CD45	0	0.357400722	0.397527912	0.1971121716
3380	CD45	0	0.758122744	0.6203983851	0.0570347266
3454	CD45	1	0.916967509	0.5992729628	0.3059721988
3464	CD45	0	0.216606498	0.4035507578	-0.111357782
3548	CD45	0	0.14801444	0.1302091363	-0.0801693594
3549	CD45	0	0.667870036	0.3816227375	0.381648598
3571	CD45	0	0.122743682	0.3347548008	0.1259961799
3615	CD45	0	0.068592058	0.4435894853	0.3843514968
3649	CD45	1	0.967509025	0.6086154032	0.2256824165
3652	CD45	1	0.953068592	0.6339571224	0.5547812946
3664	CD45	0	0.797833935	0.6188261829	0.1681357004
3674	CD45	0	0.057761733	0.2774098231	-0.1223331758
3725	CD45	0	0.187725632	0.2546927982	0.3095609246
3749	CD45	0	0.162454874	0.4744965993	0.0223316996
3750	CD45	0	0.685920578	0.5819884451	0.1032993454
3755	CD45	0	0.397111913	0.4706120834	0.1708133416
3842	CD45	1	0.812274368	0.5544918	0.3369930266
3848	CD45	1	0.97833935	0.7920782925	0.6024783348
3855	CD45	0	0.718411552	0.6644866718	0.5957466121
3866	CD45	1	0.913357401	0.6635040018	0.2070818586
3868	CD45	0	0.55234657	0.5064131483	-0.1985765414
3889	CD45	0	0.660649819	0.5134608376	0.0539549571
3898	CD45	0	0.678700361	0.6058489453	-0.0163977848
3910	CD45	0	0.523465704	0.4957126883	-0.0791765592
3917	CD45	0	0.682310469	0.5164820494	0.0513570498
3957	CD45	0	0.440433213	0.4970634548	0.1620543655
3983	CD45	0	0.036101083	0.3246744214	-0.2131853902
4014	CD45	0	0.794223827	0.6666120366	0.037998157
4031	CD45	1	0.880866426	0.6956707242	0.2082944831
4060	CD45	0	0.714801444	0.5240786777	0.0685502249
4118	CD45	0	0.252707581	0.3566386273	0.0832440137
4120	CD45	0	0.371841155	0.550117199	0.2900807163
4122	CD45	1	0.873646209	0.6581596879	0.2850203409
4136	CD45	1	0.9566787	0.5844805915	0.1970006069
4139	CD45	0	0.277978339	0.4833537787	0.2261592141
4161	CD45	0	0.202166065	0.3825976956	0.3980690301
4173	CD45	0	0.176895307	0.5053096742	0.1375858883
4182	CD45	0	0.729241877	0.507606309	0.1179702589
4207	CD45	0	0.610108303	0.6323668393	0.1686145673
4212	CD45	1	0.877256318	0.5660923783	0.3083514606
4216	CD45	0	0.310469314	0.4479716929	0.0580628203
4227	CD45	1	0.992779783	0.7319602922	0.3159074927
4257	CD45	0	0.083032491	0.3706299292	0.1744182413
4258	CD45	0	0.155234657	0.445277982	-0.2363805297
4259	CD45	1	1	0.5872203373	0.4315693001
4273	CD45	1	0.848375451	0.6198356826	0.4699118252
4279	CD45	0	0.151624549	0.5417340517	0.3196660898
4281	CD45	0	0.555956679	0.4493734307	-0.1281567166
4287	CD45	0	0.090252708	0.2453389039	-0.2042931768
4293	CD45	0	0.02166065	0.2673354517	-0.0615794204
4307	CD45	0	0.747292419	0.6147940001	0.4830992919
4313	CD45	0	0.339350181	0.6580757262	0.3676282981
4320	CD45	0	0.693140794	0.5492740409	0.2340829231
4322	CD45	0	0.76534296	0.5628209498	0.2154415632
4356	CD45	0	0.469314079	0.5835128173	0.2015328241
4366	CD45	1	0.805054152	0.695299994	0.3619256871
4401	CD45	0	0.285198556	0.4295403243	-0.0601770985
4420	CD45	1	0.866425993	0.4575290911	0.2385740108
4426	CD45	0	0.783393502	0.5965004544	0.5020699473
4441	CD45	0	0.299638989	0.4707930771	0.1290496455
4459	CD45	0	0.44765343	0.4612230579	0.0237221697
4531	CD45	0	0.696750903	0.5311632239	0.1695980209
4544	CD45	0	0.444043321	0.3876742611	0.0244254637
4549	CD45	0	0.534296029	0.4967147573	-0.1227294584
4550	CD45	0	0.086642599	0.2709938238	0.296847643
4552	CD45	0	0.014440433	0.2161458312	0.2508555601
4583	CD45	0	0.451263538	0.48191373	0.0223825099
4601	CD45	0	0.577617329	0.5945491803	0.1781724955
4642	CD45	0	0.624548736	0.5568619065	0.1027328479
4644	CD45	0	0.754512635	0.6158451849	0.1452877961
4656	CD45	0	0.054151625	0.1482839654	0.0588722267
4685	CD45	0	0.346570397	0.3696929783	0.244890072
4686	CD45	0	0.0433213	0.437564989	-0.1253334305
4768	CD45	1	0.826714801	0.4824762056	0.3130945404
4793	CD45	0	0.722021661	0.5493552484	-0.022254226
4808	CD45	0	0.675090253	0.5509588839	0.2071934966
4880	CD45	0	0.007220217	0.3104219781	0.0179797976
4920	CD45	0	0.379061372	0.5866313727	0.0063700917
4926	CD45	0	0.317689531	0.4296549051	0.0974769452
4954	CD45	0	0.490974729	0.5263626361	0.2821560376
4955	CD45	0	0.129963899	0.5612587837	0.3037189848
4985	CD45	1	0.935018051	0.7806058235	0.156565274
4987	CD45	0	0.126353791	0.3060844419	0.0143319963
4988	CD45	0	0.541516245	0.5411784886	0.0234502654
4993	CD45	0	0.63898917	0.4616994288	0.2070072017
5027	CD45	0	0.563176895	0.541695046	0.3100349426
5062	CD45	1	0.844765343	0.6842250706	0.3422713388
5073	CD45	0	0.364620939	0.483592159	0.8164233227
5075	CD45	0	0.588447653	0.4934317094	0.4364405467
5077	CD45	0	0.220216606	0.4672163909	-0.144015185
5086	CD45	0	0.350180505	0.3477436498	0.3051945992
5093	CD45	1	0.985559567	0.7550673627	0.4589231003
5097	CD45	0	0.025270758	0.0641395166	0.3338890224
5109	CD45	1	0.85198556	0.5803704684	0.2288332069
5117	CD45	0	0.050541516	0.3388617945	0.082657352
5124	CD45	0	0.537906137	0.5472850582	0.3310703753
5131	CD45	0	0.509025271	0.5294414944	0.0103710404
5136	CD45	0	0.433212996	0.5427322587	0.4301779029
5194	CD45	0	0.137184116	0.4116319154	0.3379244793
5251	CD45	1	0.862815884	0.7105106137	0.0129770601
5254	CD45	0	0.093862816	0.2587386275	0.2390454076
5257	CD45	0	0.101083032	0.193293836	-0.0244738659
5259	CD45	0	0.072202166	0.3426877528	-0.2015479589
5280	CD45	0	0.281588448	0.6320102147	0.1358857214
5282	CD45	0	0.700361011	0.6833711895	0.3192809541
5284	CD45	0	0.140794224	0.5123655255	0.1763733891
1	CD5	0	0.083682008	0.5444118584	0.0336973807
3	CD5	0	0.184100418	0.4762318347	0.0297825215
7	CD5	0	0.188284519	0.592484894	0.0895521744
25	CD5	0	0.715481172	0.6305218551	0.1792255242
89	CD5	0	0.468619247	0.4556350807	0.0249005394
108	CD5	0	0.054393305	0.3809323069	0.0594274116
125	CD5	0	0.213389121	0.4007831946	0.1968528788
173	CD5	0	0.025104603	0.354725368	0.1223121019
180	CD5	0	0.686192469	0.5850487978	0.4785802797
191	CD5	0	0.644351464	0.5257021314	0.2632943289
196	CD5	0	0.669456067	0.823828433	0.2580774865
273	CD5	0	0.556485356	0.5656056976	-0.03967528
287	CD5	0	0.623430962	0.6077374338	0.088043354
308	CD5	0	0.769874477	0.6958696087	0.095696852
332	CD5	0	0.380753138	0.4233928845	0.1610664414
335	CD5	0	0.728033473	0.5941336609	0.0770068237
351	CD5	0	0.661087866	0.5622325235	0.1073204511
376	CD5	0	0.627615063	0.6163996221	0.0885998462
384	CD5	0	0.117154812	0.5566816145	0.0084001052
385	CD5	1	0.820083682	0.6000693367	0.1635450009
386	CD5	0	0.523012552	0.3906349574	0.046268466
409	CD5	0	0.30125523	0.4942743545	0.1777191118
438	CD5	0	0.376569038	0.5973732155	0.1765549782
467	CD5	0	0.790794979	0.6112476413	0.3779581871
494	CD5	0	0.615062762	0.5866371252	0.2640842389
518	CD5	1	0.815899582	0.6932374193	0.3361428318
535	CD5	0	0.217573222	0.415142091	0.4384001207
538	CD5	1	0.878661088	0.6181836871	0.1183818024
577	CD5	0	0.765690377	0.5409172532	0.1652945474
592	CD5	0	0.062761506	0.3213620666	0.0205245392
637	CD5	1	0.807531381	0.7080825955	0.301750375
642	CD5	0	0.372384937	0.4759634864	0.1698534089
669	CD5	0	0.259414226	0.4344247939	0.1879400568
695	CD5	0	0.79916318	0.5088160733	0.2703946354
746	CD5	0	0.175732218	0.4318237697	0.1671847976
751	CD5	0	0.481171548	0.3934952994	0.1715978319
767	CD5	0	0.108786611	0.5575637876	0.2456034338
806	CD5	1	0.970711297	0.6300807582	0.4175259596
811	CD5	0	0.60251046	0.6303982752	0.1114088666
827	CD5	0	0.242677824	0.5074294232	-0.0769297006
858	CD5	0	0.368200837	0.3137631618	-0.1802670021
900	CD5	1	0.89958159	0.5289132886	0.4155108384
910	CD5	0	0.640167364	0.6617259904	0.1944610217
935	CD5	0	0.121338912	0.4713177586	0.0442465903
963	CD5	0	0.39748954	0.5522240106	0.136970945
969	CD5	1	0.933054393	0.6224446541	0.4037426984
976	CD5	0	0.577405858	0.4871156047	0.2965083287
1011	CD5	0	0.255230126	0.5524880078	0.2668689471
1026	CD5	0	0.753138075	0.6858855069	0.2255929052
1045	CD5	1	0.853556485	0.6347452748	0.4775831364
1048	CD5	0	0.125523013	0.2624487892	-0.1085738732
1061	CD5	0	0.694560669	0.6929396151	0.3119353035
1118	CD5	1	0.912133891	0.5795030126	0.2608882105
1123	CD5	0	0.682008368	0.6130329796	0.2764145096
1203	CD5	0	0.071129707	0.3153703449	0.2553567279
1204	CD5	0	0.393305439	0.5046175105	-0.014059661
1218	CD5	1	0.991631799	0.6647060288	0.4934713002
1248	CD5	0	0.569037657	0.4833373567	0.345605551
1268	CD5	0	0.205020921	0.5261339777	0.0552515408
1273	CD5	0	0.464435146	0.6283287029	0.0475595413
1279	CD5	0	0.238493724	0.5305445826	0.0454580386
1281	CD5	1	0.824267782	0.6131023117	0.4109462455
1291	CD5	0	0.355648536	0.3905551655	0.1176833421
1298	CD5	0	0.70292887	0.5102398132	0.3262210278
1318	CD5	1	0.920502092	0.6605866281	0.2177480349
1329	CD5	0	0.774058577	0.6568502895	-0.1502303803
1336	CD5	0	0.313807531	0.607619014	0.1344107138
1369	CD5	1	0.836820084	0.6792052709	0.2878405652
1373	CD5	0	0.251046025	0.4753182374	0.3314392061
1386	CD5	0	0.133891213	0.3607832501	-0.0601741253
1403	CD5	1	0.941422594	0.6454799011	0.2714019667
1414	CD5	1	0.80334728	0.6858751304	0.3458311523
1415	CD5	0	0.673640167	0.6342438162	-0.0421841568
1416	CD5	0	0.782426778	0.7047437786	0.4586588428
1431	CD5	0	0.046025105	0.3631712539	-0.0036211012
1436	CD5	0	0.443514644	0.5532937544	0.010500744
1469	CD5	0	0.033472803	0.4763106197	0.2623907976
1483	CD5	1	0.870292887	0.613918838	0.4021378091
1488	CD5	0	0.158995816	0.4360651521	0.034092287
1489	CD5	0	0.179916318	0.4327816603	-0.0692165262
1523	CD5	0	0.276150628	0.3927140416	-0.1295573754
1524	CD5	0	0.041841004	0.3963958856	-0.1503628936
1621	CD5	0	0.476987448	0.4875349482	0.1856074618
1625	CD5	0	0.585774059	0.522609845	0.2001051492
1632	CD5	0	0.619246862	0.6591186009	0.1972609303
1648	CD5	0	0.711297071	0.6033768219	0.0199603942
1690	CD5	0	0.305439331	0.5181209787	-0.0944461079
1718	CD5	0	0.09623431	0.3552943111	-0.2181938062
1724	CD5	0	0.347280335	0.5107530334	0.0832283772
1740	CD5	0	0.029288703	0.4277262411	-0.0012530385
1797	CD5	0	0.552301255	0.45631966	0.0701567975
1853	CD5	0	0.263598326	0.619513158	0.1436536061
1867	CD5	1	0.874476987	0.5539871286	0.2649256275
1895	CD5	1	0.962343096	0.6931798994	0.5424065982
1907	CD5	0	0.560669456	0.6699092496	0.1385418237
1931	CD5	1	0.887029289	0.6080225921	0.355476466
1938	CD5	0	0.757322176	0.6039784809	0.2560313738
1962	CD5	0	0.322175732	0.4395127401	0.0822459106
1968	CD5	0	0.146443515	0.2774940031	-0.1801157862
1969	CD5	0	0.564853556	0.6196021911	0.357564258
2034	CD5	1	0.828451883	0.6454467152	0.3054944303
2137	CD5	0	0.150627615	0.4610053065	0.1650356842
2168	CD5	0	0.786610879	0.540298489	0.1244428101
2202	CD5	0	0.29707113	0.4647999566	0.0528418901
2259	CD5	0	0.794979079	0.7701865271	0.0195266252
2309	CD5	0	0.50209205	0.5223683017	0.2806149429
2324	CD5	0	0.167364017	0.3465038197	0.1229314024
2335	CD5	0	0.539748954	0.4177658684	0.2788827376
2347	CD5	0	0.610878661	0.5986032526	0.1328232912
2394	CD5	1	0.861924686	0.5966240743	0.3824527712
2403	CD5	0	0.581589958	0.4738124692	0.0698243769
2406	CD5	0	0.510460251	0.4267490486	0.2465811106
2417	CD5	0	0.267782427	0.5405796219	-0.1014882003
2452	CD5	1	0.907949791	0.5926441917	0.3096359565
2463	CD5	1	0.90376569	0.7314767432	0.4844775741
2469	CD5	0	0.087866109	0.3872851702	0.0225629628
2493	CD5	0	0.066945607	0.4941060512	0.0193047663
2510	CD5	0	0.234309623	0.4060691651	0.2219903956
2524	CD5	0	0.334728033	0.5855206922	0.0707996299
2546	CD5	0	0.456066946	0.5436281943	-0.0733400638
2585	CD5	0	0.410041841	0.3048354943	0.050155673
2604	CD5	0	0.514644351	0.500050926	0.1343858696
2671	CD5	0	0.748953975	0.685951462	0.1776571855
2714	CD5	0	0.573221757	0.5718574263	0.1263171916
2724	CD5	0	0.451882845	0.63281658	0.2132045598
2746	CD5	0	0.460251046	0.4205788247	0.3049132593
2774	CD5	0	0.49790795	0.5281027989	0.1157742227
2808	CD5	1	0.832635983	0.5480670089	0.2712351183
2827	CD5	0	0.129707113	0.3724010614	-0.1792134096
2889	CD5	1	0.966527197	0.7668852817	0.1947080107
2916	CD5	0	0.493723849	0.5777885301	-0.0406327833
2923	CD5	0	0.435146444	0.5108914518	-0.0193643267
2926	CD5	0	0.761506276	0.4983571962	0.1630354917
2982	CD5	1	0.841004184	0.4950647502	0.2350916856
3022	CD5	0	0.740585774	0.5412964164	0.1192953792
3067	CD5	1	0.916317992	0.7723195844	0.2958944297
3109	CD5	1	0.945606695	0.5515445572	0.4843227859
3135	CD5	0	0.221757322	0.5907341658	0.0574232764
3160	CD5	0	0.384937238	0.5236240482	-0.0836264893
3176	CD5	0	0.589958159	0.5452086874	-0.1205513086
3190	CD5	0	0.317991632	0.6658051776	0.0613594526
3199	CD5	0	0.414225941	0.5430136608	0.1060510768
3250	CD5	0	0.330543933	0.4120966586	0.2125505375
3263	CD5	1	0.845188285	0.6007704823	0.3633430377
3293	CD5	0	0.543933054	0.3628702281	-0.0930014237
3297	CD5	1	0.882845188	0.5183910287	0.2206895127
3303	CD5	0	0.079497908	0.3417675238	0.2776056317
3344	CD5	0	0.058577406	0.4552980436	0.3565110188
3351	CD5	1	0.9958159	0.7263601165	0.2778083734
3379	CD5	0	0.690376569	0.5327727536	0.2587249231
3401	CD5	0	0.606694561	0.4856526024	0.0105123207
3481	CD5	0	0.309623431	0.5117865776	0.2764874585
3482	CD5	1	0.89539749	0.6581929968	0.2620590707
3492	CD5	1	0.987447699	0.6211686773	0.3659635907
3495	CD5	0	0.707112971	0.5827245223	0.0326419456
3517	CD5	0	0.531380753	0.519327821	0.182367204
3533	CD5	0	0.037656904	0.2699001704	-0.1923809091
3542	CD5	0	0.112970711	0.4957880628	-0.0627389256
3563	CD5	0	0.288702929	0.5263856954	0.0660674877
3578	CD5	1	0.953974895	0.6201711126	0.2091479623
3584	CD5	0	0.527196653	0.3394168551	0.0725862165
3593	CD5	0	0.719665272	0.6480418895	-0.0368709423
3618	CD5	1	0.983263598	0.5734053754	0.2694659263
3623	CD5	0	0.439330544	0.5897956006	0.2903281708
3651	CD5	0	0.163179916	0.1776379599	-0.0093040863
3656	CD5	0	0.271966527	0.4360613808	0.0628055913
3657	CD5	1	0.857740586	0.6369405183	0.3238321502
3685	CD5	0	0.10460251	0.1130860809	0.0440897628
3699	CD5	0	0.548117155	0.5805326984	0.3262568003
3708	CD5	1	0.979079498	0.7131496233	0.3706189426
3717	CD5	0	0.138075314	0.3557490255	-0.1632461736
3718	CD5	0	0.652719665	0.5616749182	0.1011080649
3757	CD5	1	0.974895397	0.6458093968	0.3895604579
3773	CD5	0	0.422594142	0.6263716873	0.1561208766
3793	CD5	0	0.050209205	0.1894834334	0.0232221797
3798	CD5	1	0.928870293	0.6943816309	0.5583660535
3804	CD5	0	0.485355649	0.4366334922	0.157929716
3844	CD5	1	0.849372385	0.6615187515	0.5430348411
3876	CD5	0	0.230125523	0.482972999	0.1796184867
3879	CD5	0	0.20083682	0.5184476043	0.1247866921
3920	CD5	0	0.677824268	0.4537464943	0.3509725868
3924	CD5	1	0.811715481	0.5215483678	0.3291646344
3952	CD5	0	0.326359833	0.3620966091	0.0686128349
3977	CD5	0	0.075313808	0.2508558557	0.1781364053
4010	CD5	0	0.447698745	0.4687123396	0.1322997163
4015	CD5	0	0.225941423	0.4319567633	0.0207544944
4018	CD5	0	0.648535565	0.4905522843	0.0885567605
4020	CD5	0	0.19665272	0.4163868105	0.2788556945
4035	CD5	0	0.280334728	0.4237168069	0.1753769408
4036	CD5	1	0.937238494	0.6889338139	0.2200988153
4057	CD5	0	0.656903766	0.5677437196	0.1344532773
4306	CD5	0	0.732217573	0.6647335967	0.2928946496
4350	CD5	1	0.866108787	0.5573524532	0.1431037007
4395	CD5	0	0.0041841	0.4137978082	-0.0255566851
4442	CD5	0	0.209205021	0.4157278337	-0.1105046579
4470	CD5	0	0.351464435	0.5611718328	0.3175775379
4472	CD5	0	0.535564854	0.4986449195	0.0751552754
4484	CD5	0	0.192468619	0.3033409337	0.1105564657
4488	CD5	0	0.430962343	0.5420953044	0.3224660283
4556	CD5	0	0.723849372	0.549706366	0.3363521644
4570	CD5	1	0.958158996	0.6108563693	0.475221976
4586	CD5	1	0.949790795	0.7522305948	0.4400137058
4599	CD5	0	0.389121339	0.4733350644	0.3858928147
4618	CD5	0	0.171548117	0.4937364678	0.0683144591
4651	CD5	0	0.418410042	0.6109769226	0.0312669008
4662	CD5	1	0.891213389	0.6209059154	0.2243828622
4663	CD5	0	0.142259414	0.2389498659	-0.0534753417
4688	CD5	0	0.092050209	0.3490307596	0.0652706403
4704	CD5	0	0.10041841	0.3578457281	0.3726087898
4731	CD5	0	0.665271967	0.636502832	0.1448817344
4753	CD5	0	0.635983264	0.5904467613	0.164197907
4756	CD5	0	0.284518828	0.340252181	0.1807489029
4817	CD5	0	0.020920502	0.4622817895	-0.0136950362
4833	CD5	0	0.292887029	0.5698318245	0.2290700457
4852	CD5	0	0.69874477	0.6073180621	0.2126479243
4853	CD5	1	0.924686192	0.6131960283	0.3645015706
4881	CD5	0	0.338912134	0.4574115321	0.0361814757
4888	CD5	0	0.744769874	0.6314639891	0.1402807118
4922	CD5	0	0.008368201	0.1254868101	-0.028508493
4958	CD5	0	0.40167364	0.3603620033	0.0480072028
4973	CD5	0	0.59832636	0.5442401968	0.0531445358
4974	CD5	0	0.778242678	0.6656873639	0.2753287028
4984	CD5	0	0.736401674	0.6322912832	0.0028339385
5001	CD5	0	0.154811715	0.3694457555	-0.0821061563
5005	CD5	0	0.518828452	0.4750224291	-0.0892937977
5011	CD5	0	0.246861925	0.4025935247	0.3405263296
5032	CD5	0	0.343096234	0.5948053137	0.2851416946
5119	CD5	0	0.631799163	0.6253527029	0.2475879335
5123	CD5	0	0.012552301	0.4547941127	0.1752780733
5125	CD5	0	0.359832636	0.4587744459	0.2106150185
5140	CD5	0	0.405857741	0.4457538554	0.184778082
5144	CD5	0	0.364016736	0.4138285811	0.2956491416
5147	CD5	0	0.594142259	0.5373143525	-0.1359655019
5167	CD5	0	0.472803347	0.4605399734	-0.0911164119
5172	CD5	0	0.506276151	0.4926773053	0.4059574824
5196	CD5	0	0.426778243	0.4129239297	-0.015242389
5205	CD5	1	1	0.7081869105	0.5668692043
5206	CD5	0	0.016736402	0.2909655409	0.1189623687
5234	CD5	0	0.489539749	0.3974785696	-0.1109624154
5	CUL3	0	0.149350649	0.2908406197	-0.1400652179
12	CUL3	0	0.188311688	0.4143436943	0.3932903934
18	CUL3	0	0.246753247	0.4098619261	0.0598152402
29	CUL3	0	0.071428571	0.3396189216	0.1997250415
45	CUL3	0	0.279220779	0.4613847192	0.0902613353
48	CUL3	0	0.62987013	0.4996671892	-0.1197247895
56	CUL3	0	0.506493506	0.484396172	0.3782043561
67	CUL3	0	0.75974026	0.3776143351	0.2687539952
85	CUL3	0	0.285714286	0.5916450041	0.3981373337
124	CUL3	0	0.558441558	0.5783741795	0.0249873856
161	CUL3	1	0.974025974	0.6333755612	0.5227738252
170	CUL3	0	0.324675325	0.5089672142	0.1755307964
190	CUL3	1	0.857142857	0.619344621	0.2611684937
192	CUL3	1	0.883116883	0.6182077555	0.5641019108
210	CUL3	1	0.961038961	0.5802073391	0.3542629754
212	CUL3	0	0.298701299	0.5362805726	0.3049942225
230	CUL3	0	0.123376623	0.3182334093	0.2987847005
250	CUL3	0	0.603896104	0.5158039794	-0.0268954486
261	CUL3	0	0.25974026	0.4521333503	0.4457394268
270	CUL3	1	0.88961039	0.3728315515	0.2653755474
329	CUL3	1	0.922077922	0.5800066862	0.2677581079
372	CUL3	1	0.87012987	0.5279474357	0.3427382855
394	CUL3	0	0.12987013	0.5269383178	0.4754379786
398	CUL3	0	0.74025974	0.5281654562	0.0493941954
474	CUL3	0	0.512987013	0.552877242	0.2523840788
543	CUL3	0	0.168831169	0.1072196248	0.0502251298
606	CUL3	0	0.636363636	0.5109215355	0.1457199006
612	CUL3	0	0.532467532	0.4584024943	0.6377207486
634	CUL3	0	0.785714286	0.5571031782	0.4096426039
748	CUL3	1	0.876623377	0.5683908486	0.2171789386
766	CUL3	0	0.253246753	0.3423492589	-0.0978958183
796	CUL3	0	0.474025974	0.5529725826	0.1945630408
919	CUL3	0	0.779220779	0.5832454915	0.0732112308
933	CUL3	0	0.707792208	0.6068998739	0.1150705665
946	CUL3	0	0.077922078	0.297642409	0.0817497021
951	CUL3	1	0.928571429	0.6807799555	0.4115633055
958	CUL3	0	0.155844156	0.0721630192	0.2043685888
967	CUL3	0	0.220779221	0.2983257974	0.1851349306
971	CUL3	0	0.727272727	0.4470930336	0.3830271866
995	CUL3	0	0.584415584	0.7161805453	0.2178833629
1053	CUL3	0	0.448051948	0.7070802772	0.3995949941
1090	CUL3	0	0.272727273	0.4021551635	0.0388220863
1107	CUL3	0	0.350649351	0.5709612175	0.1976563977
1109	CUL3	0	0.545454545	0.3380230431	-0.0440373331
1111	CUL3	0	0.564935065	0.5775533421	-0.0327923955
1127	CUL3	0	0.266233766	0.4822256142	0.1743801753
1152	CUL3	0	0.136363636	0.2668567266	0.1877376285
1171	CUL3	0	0.363636364	0.5885063318	0.4473626783
1214	CUL3	0	0.422077922	0.6198976532	0.279653243
1225	CUL3	1	1	0.5458153157	0.3770065191
1238	CUL3	0	0.233766234	0.3610227856	0.2571104518
1420	CUL3	1	0.824675325	0.5739958768	0.189782728
1486	CUL3	0	0.681818182	0.6676589218	0.2606030999
1542	CUL3	0	0.305194805	0.4047866317	-0.2567575849
1556	CUL3	0	0.461038961	0.6222953081	0.197854634
1584	CUL3	0	0.642857143	0.7132716013	0.4867791938
1869	CUL3	0	0.337662338	0.5565033183	0.2058195997
1984	CUL3	0	0.701298701	0.6974964125	0.4200167553
2041	CUL3	0	0.175324675	0.2978515458	0.1489508888
2052	CUL3	1	0.993506494	0.6754793077	0.5629225259
2249	CUL3	0	0.142857143	0.2926495666	0.0075688884
2255	CUL3	0	0.649350649	0.6588709193	0.2849864037
2280	CUL3	0	0.24025974	0.5116480121	-0.133668684
2351	CUL3	1	0.837662338	0.4266142916	0.2791716839
2381	CUL3	0	0.045454545	0.3508608653	0.0218981945
2402	CUL3	0	0.772727273	0.558944812	-0.0911531746
2505	CUL3	0	0.798701299	0.5581268957	0.3130867637
2523	CUL3	1	0.805194805	0.5009389023	0.5981571649
2599	CUL3	0	0.162337662	0.5719521936	0.0991696488
2601	CUL3	0	0.064935065	0.3391751091	-0.18219125
2613	CUL3	1	0.987012987	0.5090038043	0.103504732
2705	CUL3	0	0.688311688	0.5940828422	0.0579648317
2711	CUL3	0	0.733766234	0.6078577273	0.2084812384
2744	CUL3	0	0.675324675	0.568093199	-0.2571311487
2760	CUL3	0	0.415584416	0.4670000896	-0.0141792265
2807	CUL3	0	0.227272727	0.4072386343	-0.0038214028
2818	CUL3	1	0.980519481	0.6906278498	0.6774472446
2832	CUL3	0	0.577922078	0.4750029409	0.1511423437
2922	CUL3	0	0.194805195	0.2605379959	-0.0172340567
2930	CUL3	0	0.344155844	0.5272533909	0.2895461187
2980	CUL3	0	0.454545455	0.4985322258	0.2958092951
2998	CUL3	1	0.811688312	0.6834039732	0.4970637447
3021	CUL3	0	0.694805195	0.514307309	0.2825694906
3129	CUL3	1	0.948051948	0.587916119	0.2554292289
3146	CUL3	0	0.409090909	0.6028063161	0.1973706545
3177	CUL3	0	0.032467532	0.289062357	-0.0364878292
3178	CUL3	0	0.214285714	0.5352472807	0.0884749999
3240	CUL3	0	0.623376623	0.4457504196	-0.0447498528
3254	CUL3	0	0.038961039	0.2167696963	-0.010164859
3259	CUL3	0	0.720779221	0.728161177	-0.038839342
3308	CUL3	0	0.662337662	0.4648796273	0.2005439821
3326	CUL3	0	0.525974026	0.6370374224	-0.0850125101
3352	CUL3	0	0.467532468	0.5464038672	0.2133448477
3359	CUL3	0	0.538961039	0.6714412579	-0.0037473988
3383	CUL3	0	0.201298701	0.4928014306	0.1868985238
3457	CUL3	0	0.480519481	0.4834177957	0.1496136114
3716	CUL3	1	0.954545455	0.5343203153	0.4425488318
3744	CUL3	0	0.519480519	0.4639665447	0.1375603048
3794	CUL3	1	0.941558442	0.6381597208	0.4640822998
3867	CUL3	0	0.396103896	0.6916497278	0.2884156854
3926	CUL3	0	0.37012987	0.5790697671	0.3873147072
3993	CUL3	0	0.428571429	0.3653058222	0.182698437
4021	CUL3	0	0.668831169	0.5088414158	0.2115836257
4025	CUL3	0	0.207792208	0.2931420567	0.5323638443
4028	CUL3	0	0.38961039	0.5347933618	0.6392251125
4046	CUL3	0	0.435064935	0.5739796118	0.2730935954
4056	CUL3	0	0.753246753	0.3402189986	0.1606545467
4069	CUL3	0	0.616883117	0.5205958089	0.5039159678
4086	CUL3	0	0.487012987	0.389348099	-0.0662025226
4155	CUL3	0	0.441558442	0.5419221509	0.1607500063
4159	CUL3	0	0.551948052	0.5143790703	0.2486017167
4169	CUL3	0	0.493506494	0.5109153075	0.1780925998
4174	CUL3	0	0.311688312	0.3449601918	0.0696632042
4188	CUL3	0	0.597402597	0.4573870835	0.3154054223
4198	CUL3	0	0.11038961	0.3551859153	0.0422414696
4219	CUL3	0	0.376623377	0.5186056083	0.2517354119
4220	CUL3	1	0.902597403	0.6397757527	0.6214933708
4244	CUL3	0	0.5	0.5079519503	0.2748629612
4246	CUL3	0	0.714285714	0.4686150125	0.1127471888
4264	CUL3	1	0.935064935	0.6984846053	0.4339008954
4289	CUL3	0	0.012987013	0.3307594596	-0.1644475273
4294	CUL3	0	0.292207792	0.5248958979	0.0913670178
4370	CUL3	0	0.116883117	0.3561359108	0.2585172597
4454	CUL3	0	0.331168831	0.3394648613	0.4635191027
4497	CUL3	0	0.181818182	0.5502875433	0.2003400752
4554	CUL3	0	0.051948052	0.2539283424	0.1861790222
4630	CUL3	0	0.61038961	0.5388353973	-0.0424691846
4653	CUL3	1	0.909090909	0.5956476838	0.3744189067
4655	CUL3	0	0.590909091	0.4696609389	0.0216413405
4760	CUL3	0	0.006493506	0.2357087957	0.1993084184
4842	CUL3	0	0.357142857	0.7208637174	0.0206463659
4897	CUL3	0	0.792207792	0.5865105623	0.0532849388
4921	CUL3	0	0.383116883	0.2815381131	-0.0736106791
4943	CUL3	0	0.318181818	0.5461933283	0.1791315507
4957	CUL3	0	0.746753247	0.3917948912	0.1453947834
4996	CUL3	0	0.058441558	0.242727519	-0.0170023597
5038	CUL3	1	0.818181818	0.5303599248	0.2057023877
5041	CUL3	0	0.766233766	0.4789034807	0.1585108286
5044	CUL3	0	0.097402597	0.4080050375	0.2184110913
5074	CUL3	1	0.967532468	0.4256667676	0.5095593897
5092	CUL3	0	0.025974026	0.4327680574	0.3412785148
5096	CUL3	0	0.084415584	0.4426900041	-0.0572310469
5149	CUL3	1	0.915584416	0.7635148715	0.3134936786
5178	CUL3	0	0.090909091	0.2384941004	0.3231754748
5188	CUL3	0	0.655844156	0.6441981647	0.218354664
5232	CUL3	1	0.863636364	0.6551229014	0.379687151
5250	CUL3	0	0.019480519	0.2613794248	0.286798055
5273	CUL3	1	0.831168831	0.5926680265	0.2574343741
5275	CUL3	1	0.844155844	0.6224393329	0.5364563031
5276	CUL3	0	0.402597403	0.3243334575	0.0347158639
5286	CUL3	1	0.896103896	0.6066104053	0.2424168334
5298	CUL3	0	0.103896104	0.175718236	0.3225538659
5306	CUL3	1	0.850649351	0.5867579731	0.0282480246
5307	CUL3	0	0.571428571	0.4920657478	0.230313364
21	H2-K	0	0.692307692	0.6424022417	0.3649109399
94	H2-K	0	0.426035503	0.5072004452	-0.0820984186
95	H2-K	0	0.769230769	0.6002272873	0.218920935
122	H2-K	0	0.526627219	0.5197948337	0.0142788183
127	H2-K	0	0.473372781	0.4851404289	0.0405537793
154	H2-K	0	0.165680473	0.4769984453	0.1254343567
172	H2-K	0	0.591715976	0.5836526308	0.2321579859
208	H2-K	0	0.568047337	0.5179235075	0.2889734993
330	H2-K	0	0.029585799	0.2875153505	0.1749896805
347	H2-K	0	0.639053254	0.5993645492	-0.1685485832
350	H2-K	0	0.047337278	0.4520434738	0.2375267374
410	H2-K	0	0.284023669	0.419371669	-0.2470878386
411	H2-K	0	0.159763314	0.4284917887	0.1122954577
422	H2-K	0	0.059171598	0.4824440288	0.0216760075
444	H2-K	0	0.349112426	0.5105636564	-0.1291042991
502	H2-K	0	0.514792899	0.5322902044	0.1502468795
584	H2-K	1	0.875739645	0.6794619714	0.4796384101
594	H2-K	0	0.355029586	0.7052477673	0.1490720779
600	H2-K	0	0.704142012	0.6737584651	0.0921843565
608	H2-K	1	0.828402367	0.5418126833	0.3590727106
633	H2-K	0	0.710059172	0.6538654459	0.4144124578
674	H2-K	0	0.792899408	0.3812112779	0.2187035861
702	H2-K	0	0.218934911	0.3502847201	0.0590111061
715	H2-K	0	0.50887574	0.5160074796	0.6679593874
720	H2-K	1	0.899408284	0.3841485358	0.2660384733
820	H2-K	1	0.822485207	0.6499636949	0.1875302385
839	H2-K	1	0.881656805	0.6310936649	0.4862947839
850	H2-K	0	0.366863905	0.7038988769	0.2021488086
866	H2-K	0	0.378698225	0.5247937397	0.1006370231
889	H2-K	0	0.733727811	0.6879206657	0.3075446592
945	H2-K	0	0.562130178	0.3971110605	0.4350273585
1028	H2-K	0	0.609467456	0.4646402213	-0.1007539328
1082	H2-K	0	0.449704142	0.4557883661	-0.051470685
1099	H2-K	0	0.455621302	0.6109343623	0.2476996234
1147	H2-K	0	0.431952663	0.4972132045	0.0255698847
1219	H2-K	1	0.976331361	0.7120392424	0.5690358556
1231	H2-K	0	0.437869822	0.3653312255	0.1793652688
1239	H2-K	1	0.911242604	0.627826327	0.1904013903
1251	H2-K	0	0.289940828	0.4084536089	0.1357456087
1255	H2-K	1	0.857988166	0.5242830834	0.0844120628
1284	H2-K	0	0.065088757	0.2153992308	0.0343271177
1301	H2-K	0	0.485207101	0.6592537039	0.3750296775
1305	H2-K	0	0.579881657	0.4981973714	0.2054344318
1317	H2-K	0	0.124260355	0.3376431934	-0.1590604498
1458	H2-K	0	0.130177515	0.4831551456	-0.0779300066
1472	H2-K	0	0.686390533	0.5627430458	0.2748449005
1476	H2-K	0	0.278106509	0.473111771	0.1323538088
1534	H2-K	0	0.118343195	0.3181382658	0.1088578107
1538	H2-K	0	0.076923077	0.3197604316	0.1864248178
1551	H2-K	0	0.585798817	0.6502109665	0.1212005641
1560	H2-K	0	0.035502959	0.1733681983	0.0356053162
1622	H2-K	0	0.112426036	0.2862976165	0.2698926332
1654	H2-K	0	0.443786982	0.548674722	0.223775427
1697	H2-K	0	0.627218935	0.5050944343	0.0572128982
1722	H2-K	1	0.852071006	0.6571443827	0.4309029305
1756	H2-K	0	0.337278107	0.520505129	0.3637827203
1775	H2-K	0	0.49704142	0.6422064799	0.4298535815
1781	H2-K	0	0.195266272	0.3127115392	-0.0528952541
1812	H2-K	0	0.420118343	0.3283231752	0.2202815013
1817	H2-K	0	0.674556213	0.6195969972	0.1563414687
1838	H2-K	0	0.25443787	0.3620776938	-0.2070911254
1852	H2-K	0	0.75147929	0.6026540931	0.3909473938
1890	H2-K	0	0.071005917	0.2422084888	0.0446758753
1915	H2-K	0	0.573964497	0.4397739912	-0.090209403
1927	H2-K	0	0.360946746	0.5454718382	0.0774263492
1933	H2-K	0	0.414201183	0.6571518898	0.2474191838
1954	H2-K	0	0.384615385	0.4497128443	-0.0203823882
1992	H2-K	0	0.171597633	0.4267544489	-0.067239268
2018	H2-K	1	0.834319527	0.6449380918	0.227920951
2024	H2-K	1	0.905325444	0.6751461112	0.3594899841
2040	H2-K	0	0.532544379	0.5802157843	0.2418206144
2083	H2-K	0	0.088757396	0.272312327	-0.0299253736
2102	H2-K	0	0.319526627	0.4634977189	-0.0340240516
2105	H2-K	0	0.189349112	0.3116911611	0.2144239154
2108	H2-K	0	0.479289941	0.4384063131	0.073817952
2118	H2-K	1	0.99408284	0.6190925342	0.1819756957
2146	H2-K	1	0.952662722	0.7102490886	0.4457323746
2154	H2-K	0	0.75739645	0.6112203716	0.1341191757
2161	H2-K	0	0.538461538	0.6093227882	0.3292675015
2194	H2-K	1	0.946745562	0.724273577	0.2605434533
2195	H2-K	1	0.816568047	0.5277908458	0.0999242596
2212	H2-K	0	0.325443787	0.7250566178	0.4930239874
2216	H2-K	0	0.520710059	0.5384631648	0.4958124545
2233	H2-K	0	0.798816568	0.6453275845	0.1491160431
2296	H2-K	0	0.230769231	0.3170158686	0.189532156
2323	H2-K	0	0.603550296	0.6229145796	-0.0267286687
2328	H2-K	0	0.224852071	0.5146328066	-0.0815617042
2384	H2-K	1	0.98816568	0.7748426681	0.3130158021
2393	H2-K	0	0.136094675	0.3295035607	0.2864965864
2477	H2-K	0	0.644970414	0.4953192177	0.1608864878
[truncated: 3,311 more rows]
